# Supplementary material
Source: publisher site journal article supplement (https://www.spandidos-publications.com/5451/downloadSupplementary)
Supplement: Supplementary file 1 [file downloadSupplementary]

## Sheet: g2_VS_g1_p005fc2_m
TableSIV. Differential expression of mRNAs between GC-MSCs and BM-MSCs.
ProbeName	pvalues	foldchange	GC_1_NS	GC_2_NS	GC_3_NS	GC_1_flags	GC_2_flags	GC_3_flags	BM_1_NS	BM_2_NS	BM_3_NS	BM_1_flags	BM_2_flags	BM_3_flags	ProbeName.1	Type	ProbeSeq	Accession	Source	Chromosome	Strand	Start	End	GeneSymbol	Gene_ID	Description	GO	Relation	Associated_gene	Associated_gene_description	Associated_gene_strand	circRNA_ID	circ_chrom	Hsa_hg19_circRNA_start	Hsa_hg19_circRNA_end	Hsa_hg19_circRNA_strand	genomic_length	spliced_seq_length	best_transcript	hostgene
LNCV6_134171_PI430048170	0.00363381	0.474248	4.99232	5.15473	4.70417	P	P	P	6.239	5.98888	5.86189	P	P	P	LNCV6_134171_PI430048170	mRNA	GGTACCTGTGTTGAGTTGATAAACATTTCCATCTTCATTAAAACTGCTTCCAAACTAGTA	NM_014376	RefSeq	chr5	+	157269341	157395598	CYFIP2	26999	cytoplasmic FMR1 interacting protein 2, transcript variant 3	GO:0005515|GO:0043005|GO:0048010|GO:0048471|GO:0030054|GO:0006915|GO:0045202|GO:0097202|GO:0045862|GO:0005829|GO:0005737|GO:0016337|GO:0016020|GO:0045087|GO:0038096|GO:0070062	.	NA	-	.	NA	NA	NA	NA	NA	NA	NA	NA	NA
LNCV6_144194_PI430048170	0.00169747	2.15185	5.18461	5.07593	4.8501	P	P	P	4.06208	3.7154	4.01254	P	P	P	LNCV6_144194_PI430048170	mRNA	GGCTTACTGTAGTAGAAACTTTAGTTTTGATGATGCACAAAATAAACAGCAGTGGTTCTC	NM_001018113	RefSeq	chrX	-	14843406	14873062	FANCB	2187	Fanconi anemia, complementation group B, transcript variant 1	GO:0005515|GO:0006281|GO:0005654|GO:0043240	.	NA	-	.	NA	NA	NA	NA	NA	NA	NA	NA	NA
LNCV6_131507_PI430048170	1.26966e-05	0.429027	12.0381	11.9352	11.9409	P	P	P	13.2147	13.1372	13.2258	P	P	P	LNCV6_131507_PI430048170	mRNA	TTATCCTTCCAGTTTCAAGTAGAATATATTCATAACCTCAATAAAGTTCTCCCTGCTCCC	NM_147780	RefSeq	chr8	-	11842524	11868137	CTSB	1508	cathepsin B, transcript variant 2	GO:0005515|GO:0097067|GO:0048471|GO:0005518|GO:0005764|GO:0005615|GO:0043231|GO:0005739|GO:0005622|GO:0046697|GO:0022617|GO:0030198|GO:0051603|GO:0036021|GO:0030574|GO:0030855|GO:0006508|GO:0070062|GO:0042470|GO:0005730|GO:0043394|GO:0005576|GO:0042981|GO	.	NA	-	.	NA	NA	NA	NA	NA	NA	NA	NA	NA
LNCV6_130194_PI430048170	0.000308913	0.225135	2.70492	2.87672	2.71946	P	P	P	5.11319	4.85172	4.77368	P	P	P	LNCV6_130194_PI430048170	mRNA	GACAAGTTTGTTGTGTTTAACTCACCAACACGTGGTGTATAATGAAGACAGAACTATAAT	NM_020873	RefSeq	chr3	+	3799436	3847703	LRRN1	57633	leucine rich repeat neuronal 1	GO:0016021	.	NA	-	.	NA	NA	NA	NA	NA	NA	NA	NA	NA
LNCV6_50037_PI430048170	0.00132647	2.45023	5.12656	4.99459	5.23553	P	P	P	4.02	3.80594	3.63634	P	P	P	LNCV6_50037_PI430048170	mRNA	ACAATTTAGAAACAGAAAAACTGTGTGACTACTTCTCAGAGCACCTGGGTGTCTACCGGC	NM_031232	RefSeq	chr20	-	33657086	33674458	NECAB3	63941	N-terminal EF-hand calcium binding protein 3, transcript variant 2	GO:0005515|GO:0005737|GO:0000137|GO:0009306|GO:0005509|GO:0005789|GO:0005634|GO:0042984|GO:0019538	.	NA	-	.	NA	NA	NA	NA	NA	NA	NA	NA	NA
LNCV6_144896_PI430048170	0.0111348	2.16141	11.6862	11.4202	11.2772	P	P	P	10.38	10.3445	10.3531	P	P	P	LNCV6_144896_PI430048170	mRNA	GCCAAATCTTGTTTTATGTCCTGTCCTCATCTCTTAAGCTAAATCTGTTTGGATCATATT	NM_015529	RefSeq	chr6	-	132296054	132401534	MOXD1	26002	monooxygenase, DBH-like 1	GO:0005507|GO:0005789|GO:0016021|GO:0016715|GO:0055114	.	NA	-	.	NA	NA	NA	NA	NA	NA	NA	NA	NA
LNCV6_136315_PI430048170	0.0244248	0.464968	3.00486	2.32504	2.21439	P	P	A	3.80008	3.32322	3.81585	P	P	P	LNCV6_136315_PI430048170	mRNA	ATCATTAGGCTGAACTGTCTCTTATAGAATGAGGTCAAAGACACTCCCAGTTGCAGGGAG	NM_152654	RefSeq	chr19	+	12969617	12974753	DAND5	199699	DAN domain family member 5, BMP antagonist	GO:1900108|GO:0030514|GO:0016015|GO:0003140|GO:0003283|GO:0005576|GO:0003281|GO:0038101|GO:0061371|GO:0030512	.	NA	-	.	NA	NA	NA	NA	NA	NA	NA	NA	NA
LNCV6_128911_PI430048170	3.31804e-07	0.0479119	10.1874	10.0925	10.034	P	P	P	14.4683	14.4402	14.5575	P	P	P	LNCV6_128911_PI430048170	mRNA	GATCTCCTGCTGCCTTTTCTGGAGTTTGTAAAATTGTTCCTGAATACAAGCCTATGCGTG	NM_003881	RefSeq	chr20	+	44715243	44727811	WISP2	8839	WNT1 inducible signaling pathway protein 2	GO:0007165|GO:0005178|GO:0005886|GO:0060548|GO:0007267|GO:0005578|GO:0007155|GO:0008201|GO:0005615|GO:0001558|GO:0070062|GO:0005520	.	NA	-	.	NA	NA	NA	NA	NA	NA	NA	NA	NA
LNCV6_133790_PI430048170	0.000165233	2.16913	6.99356	6.95184	7.08356	P	P	P	5.8777	5.9937	5.80294	P	P	P	LNCV6_133790_PI430048170	mRNA	AGTCGTCCTCAGTCCTGAGTTGTGACATCTCCAGAAATAACAAATACATCGTGACAGGCT	NM_001300846	RefSeq	chr19	-	2997637	3029201	TLE2	7089	transducin-like enhancer of split 2, transcript variant 4	GO:0005515|GO:0007165|GO:0007219|GO:0003714|GO:0009887|GO:0005654|GO:0005634|GO:0016055|GO:0090090|GO:0045892|GO:0005615|GO:0006351	.	NA	-	.	NA	NA	NA	NA	NA	NA	NA	NA	NA
LNCV6_136919_PI430048170	0.000382854	0.197575	9.69397	9.69228	9.52625	P	P	P	11.9909	11.9585	11.9879	P	P	P	LNCV6_136919_PI430048170	mRNA	GCTAAAGGGGAAATGGACTTTAAATTTTAAAGAGCTCATTTGCAATGCACTTGTATACAC	NM_021229	RefSeq	chr12	-	95657806	95790758	NTN4	59277	netrin 4	GO:0016322|GO:0060668|GO:0005886|GO:0030198|GO:0007411|GO:0043237|GO:0005604	.	NA	-	.	NA	NA	NA	NA	NA	NA	NA	NA	NA
LNCV6_139116_PI430048170	0.000763774	0.359944	5.14015	5.40463	5.00334	P	P	P	6.56423	6.86413	6.54906	P	P	P	LNCV6_139116_PI430048170	mRNA	CGCCTTAAGTGTTTCAATTGTCCTTTGTAGAAAAGCCAGATAAATGAGTTCACTTTGAAT	NM_020949	RefSeq	chr3	-	170459553	170586074	SLC7A14	57709	solute carrier family 7, member 14	GO:0015171|GO:0010923|GO:0016021|GO:0005765|GO:0003333	.	NA	-	.	NA	NA	NA	NA	NA	NA	NA	NA	NA
LNCV6_129329_PI430048170	0.00130815	2.4702	4.56802	4.93216	4.68354	P	P	P	3.59038	3.19059	3.4841	P	P	P	LNCV6_129329_PI430048170	mRNA	TGTGACCTAAGGGTCCGCATTACTGCCCTTCTTCGGAGGAACTGGTTTGTTTTTAAAAAA	NM_022377	RefSeq	chr19	+	10286966	10288584	ICAM4	3386	intercellular adhesion molecule 4 (Landsteiner-Wiener blood group), transcript variant 2	GO:0016337|GO:0005737|GO:0005178|GO:0005886|GO:0030198|GO:0005887|GO:0050776|GO:0016021|GO:0007155|GO:0005615	.	NA	-	.	NA	NA	NA	NA	NA	NA	NA	NA	NA
LNCV6_138637_PI430048170	0.000296985	0.496921	9.691	9.70243	9.58388	P	P	P	10.7694	10.6583	10.5725	P	P	P	LNCV6_138637_PI430048170	mRNA	AAAGATTAACTTTTGACTAACCCTGGAATATCTCTTATCTCACTTATAGCTTCAGGCATG	NM_001289758	RefSeq	chr10	+	89327818	89340968	IFIT3	3437	interferon-induced protein with tetratricopeptide repeats 3, transcript variant 3	GO:0005515|GO:0043066|GO:0008285|GO:0035457|GO:0019221|GO:0009615|GO:0005829|GO:0042802|GO:0005739|GO:0003674|GO:0005737|GO:0051607|GO:0060337	.	NA	-	.	NA	NA	NA	NA	NA	NA	NA	NA	NA
LNCV6_143307_PI430048170	0.000420596	0.0133221	0.300308	0.234118	0.207762	A	A	A	6.63905	6.58975	6.15838	P	P	P	LNCV6_143307_PI430048170	mRNA	GCACTTGTTAAACTGTGATGAACTTGTGATTTTGTGTTTTACTTGACCAAAACCAAGTGT	NM_005664	RefSeq	chr15	+	23565306	23568019	MKRN3	7681	makorin ring finger protein 3	GO:0005515|GO:0016567|GO:0030529|GO:0016874|GO:0008270	.	NA	-	.	NA	NA	NA	NA	NA	NA	NA	NA	NA
LNCV6_129820_PI430048170	1.5754e-05	0.0367481	7.13796	6.98705	6.81172	P	P	P	11.7161	11.6774	11.8542	P	P	P	LNCV6_129820_PI430048170	mRNA	CTGCTGGATGCTGCTTGTAATCCATTTGGTGTACAGAATCAACAATAAATAATATACATG	NM_001135057	RefSeq	chr3	-	194355246	194369743	LRRC15	131578	leucine rich repeat containing 15, transcript variant 1	GO:0030335|GO:0043236|GO:0005518|GO:0090005|GO:0016021|GO:0001968|GO:0046813|GO:0070062	.	NA	-	.	NA	NA	NA	NA	NA	NA	NA	NA	NA
LNCV6_143292_PI430048170	0.00634566	0.410734	2.41311	2.91367	2.31184	A	P	A	3.98899	3.98232	3.55073	P	P	P	LNCV6_143292_PI430048170	mRNA	TAAAAAGCCAGCAAACTATCTTCAAACTCTTCCGTCCTTAATGTCTTCCATGGCTATTGC	NM_030788	RefSeq	chr8	+	104339795	104356689	DCSTAMP	81501	dendrocyte expressed seven transmembrane protein, transcript variant 1	GO:0005515|GO:0030308|GO:0072675|GO:0036006|GO:0009986|GO:0030316|GO:0030176|GO:0045780|GO:0045657|GO:0005887|GO:0033116|GO:0071356|GO:0005789|GO:0071353|GO:0061025|GO:0016021|GO:0043011|GO:0010008|GO:0034241	.	NA	-	.	NA	NA	NA	NA	NA	NA	NA	NA	NA
LNCV6_142217_PI430048170	0.000279226	0.331017	9.90291	9.67764	9.61403	P	P	P	11.3285	11.429	11.2316	P	P	P	LNCV6_142217_PI430048170	mRNA	GGTGTGTGAGGAAGTCACTACTCCTAGCCTTTGTTAAGATGTAATTTTAAATATTCAGTT	NM_015225	RefSeq	chr9	-	76611375	76906087	PRUNE2	158471	prune homolog 2 (Drosophila)	GO:0016462|GO:0005737|GO:0008152|GO:0006915|GO:0046872	.	NA	-	.	NA	NA	NA	NA	NA	NA	NA	NA	NA
LNCV6_134358_PI430048170	0.00100052	5.02074	8.11636	8.10719	7.94299	P	P	P	5.9113	5.78401	5.45683	P	P	P	LNCV6_134358_PI430048170	mRNA	TTGTGCTTTCCTGAAAGCAGTAACCAAGAGTTAAGATATCCCTAATGTTTTGCTTAAACT	NM_001049	RefSeq	chr14	+	38207998	38213063	SSTR1	6751	somatostatin receptor 1	GO:0043005|GO:0008285|GO:0005886|GO:0007584|GO:0007586|GO:0007267|GO:0007268|GO:0021549|GO:0007215|GO:0007283|GO:0004994|GO:0005737|GO:0042594|GO:0042923|GO:0005887|GO:0007187|GO:0007218|GO:0071392|GO:0030900|GO:0007166	.	NA	-	.	NA	NA	NA	NA	NA	NA	NA	NA	NA
LNCV6_142851_PI430048170	0.0160471	0.415922	3.82986	4.59522	4.17502	P	P	P	5.63614	5.53475	5.309	P	P	P	LNCV6_142851_PI430048170	mRNA	TCTCAAATGTTACCTACTAAGGGATGCCTGGGTAAGCCACTCAGCTACCTAATTCCTCAA	NM_020056	RefSeq	chr6	+	32741385	32746887	HLA-DQA2	3118	major histocompatibility complex, class II, DQ alpha 2	GO:0050852|GO:0012507|GO:0005886|GO:0019221|GO:0031295|GO:0042613|GO:0005765|GO:0032588|GO:0030666|GO:0019886|GO:0006955|GO:0000139|GO:0005887|GO:0071556|GO:0032395|GO:0030669|GO:0010008|GO:0060333|GO:0030658	.	NA	-	.	NA	NA	NA	NA	NA	NA	NA	NA	NA
LNCV6_135718_PI430048170	0.000906349	0.397032	10.3233	10.2274	9.95111	P	P	P	11.6276	11.5533	11.3276	P	P	P	LNCV6_135718_PI430048170	mRNA	TTAATGAAATCTGTATGGATATGGAAATGCTTGCCCTAATAAAAGCCTACATATACCTCC	NM_015469	RefSeq	chr9	+	104747687	104760122	NIPSNAP3A	25934	nipsnap homolog 3A (C. elegans)	GO:0005515|GO:0005634|GO:0005829	.	NA	-	.	NA	NA	NA	NA	NA	NA	NA	NA	NA
LNCV6_136090_PI430048170	0.00050443	0.41186	8.46644	8.46725	8.38139	P	P	P	9.59997	9.81326	9.73484	P	P	P	LNCV6_136090_PI430048170	mRNA	GGGAGTTGGCTGTGTTAAAGAAAGACCATTAAATGCTTTAGACAGTGTATTTATACCAGT	NM_144586	RefSeq	chr2	-	132644763	132670908	LYPD1	116372	LY6/PLAUR domain containing 1, transcript variant 1	GO:0005886|GO:0031225	.	NA	-	.	NA	NA	NA	NA	NA	NA	NA	NA	NA
LNCV6_136633_PI430048170	0.000208653	3.92614	6.41262	6.16066	6.04993	P	P	P	4.28838	4.39075	4.02477	P	P	P	LNCV6_136633_PI430048170	mRNA	GCTGCCTATGAATGGAGATTCAGTAGTCATTGTATGCATCTTTAAGTCAAATGTGTATTA	NM_003812	RefSeq	chr2	+	206443643	206621131	ADAM23	8745	ADAM metallopeptidase domain 23	GO:0005515|GO:0005178|GO:0005887|GO:0006508|GO:0008270|GO:0005576|GO:0007417|GO:0007155|GO:0004222|GO:0008237	.	NA	-	.	NA	NA	NA	NA	NA	NA	NA	NA	NA
LNCV6_107426_PI430048170	0.000115291	0.291308	5.70067	5.46985	5.52179	P	P	P	7.42289	7.27828	7.3359	P	P	P	LNCV6_107426_PI430048170	mRNA	ATCTCTAGATCAACAAGCAAAGGAGGTGCCAAGCCTGTTTGTCTTCATTGTGACACTGGA	NM_001280794	RefSeq	chr7	+	142855013	142871093	EPHB6	2051	EPH receptor B6, transcript variant 2	GO:0005003|GO:0048013|GO:0005886|GO:0007411|GO:0005887|GO:0006468|GO:0005576|GO:0004872|GO:0005524|GO:0005829	.	NA	-	.	NA	NA	NA	NA	NA	NA	NA	NA	NA
LNCV6_133366_PI430048170	0.00162681	0.236617	1.26918	1.73647	1.94479	A	A	A	3.52227	4.00385	3.70119	P	P	P	LNCV6_133366_PI430048170	mRNA	ATGAAAAGGTCATAGAACACATCATGGAGGACCTGGACACAAATGCAGACAAGCAGCTGA	NM_002965	RefSeq	chr1	+	153357853	153361027	S100A9	6280	S100 calcium binding protein A9	GO:0005515|GO:0008017|GO:0035662|GO:0050544|GO:0005886|GO:0030307|GO:0045471|GO:0050832|GO:0007267|GO:0005634|GO:0001816|GO:0005615|GO:0010043|GO:0005829|GO:0051092|GO:0006954|GO:0050786|GO:0032602|GO:0032496|GO:0004871|GO:0005856|GO:0042742|GO:0070062|GO	.	NA	-	.	NA	NA	NA	NA	NA	NA	NA	NA	NA
LNCV6_132143_PI430048170	0.0491771	0.320864	1.85819	2.9158	1.48797	A	P	A	4.00385	3.71277	3.84859	P	P	P	LNCV6_132143_PI430048170	mRNA	GGGTGTGAACTATGGTTTAGAAGGTTCAAGTTTCCAATTAAAGTCATTGAAGAAAACTTG	NM_001172439	RefSeq	chr12	-	47709734	47725572	ENDOU	8909	endonuclease, polyU-specific, transcript variant 1	GO:0007565|GO:0030145|GO:0005886|GO:0003723|GO:0005576|GO:0004521|GO:0005615|GO:0006898|GO:0005737|GO:0006955|GO:0006508|GO:0008236|GO:0030247|GO:0008083|GO:0005044	.	NA	-	.	NA	NA	NA	NA	NA	NA	NA	NA	NA
LNCV6_138577_PI430048170	0.000425679	2.6186	3.80863	4.09616	4.08065	P	P	P	2.67557	2.43097	2.71421	P	A	P	LNCV6_138577_PI430048170	mRNA	CAAGGAGGTAAAGGAAGGCTTTAAAAGGTTGGTTGCAAGAGTCTTCTTAATCAAGAAATA	NM_012367	RefSeq	chr6	+	27957240	27958182	OR2B6	26212	olfactory receptor, family 2, subfamily B, member 6	GO:0050911|GO:0004984|GO:0007186|GO:0005886|GO:0004930|GO:0016021	.	NA	-	.	NA	NA	NA	NA	NA	NA	NA	NA	NA
LNCV6_136156_PI430048170	0.00235795	2.29329	6.14562	5.95149	5.71734	P	P	P	4.52727	4.74259	4.95272	P	P	P	LNCV6_136156_PI430048170	mRNA	AAATGGTACAGCAGGTGCACTGTTAACAGTGTGATGGAATGACCACCCAAAGAGAAAAAA	NM_001303133	RefSeq	chr13	+	111316184	111344247	TEX29	121793	testis expressed 29, transcript variant 1	GO:0016021	.	NA	-	.	NA	NA	NA	NA	NA	NA	NA	NA	NA
LNCV6_140420_PI430048170	0.00959045	0.490254	11.3871	11.0569	11.1085	P	P	P	12.2152	12.2273	12.2176	P	P	P	LNCV6_140420_PI430048170	mRNA	AAATGCGACGAACCTCTGAGCATCCTGGTGAGGAATAACAAGGGCCGCAGCAGCACCTAC	NM_005101	RefSeq	chr1	+	1013466	1014539	ISG15	9636	ISG15 ubiquitin-like modifier	GO:0005515|GO:0032020|GO:0019221|GO:0005576|GO:0005829|GO:0032649|GO:0051607|GO:0060337|GO:0045648|GO:0045087|GO:0019941|GO:0016032|GO:0031386|GO:0034340|GO:0031397|GO:0032480|GO:0042742|GO:0045071	.	NA	-	.	NA	NA	NA	NA	NA	NA	NA	NA	NA
LNCV6_142880_PI430048170	0.000124863	0.0675975	5.61037	5.31475	5.15025	P	P	P	9.3386	9.11488	9.31056	P	P	P	LNCV6_142880_PI430048170	mRNA	CCAGAAAATGAAATCCGTGAAGTCACATTCCACATCTGTTTCAAACTGAATTTGTTCTTA	NM_004093	RefSeq	chr13	-	106489730	106535040	EFNB2	1948	ephrin-B2	GO:0005515|GO:0010839|GO:0048013|GO:0005886|GO:0002042|GO:0007267|GO:0009653|GO:2000727|GO:0046875|GO:0050920|GO:0005887|GO:0007411|GO:0009887|GO:0016032|GO:0007155|GO:0005925|GO:0001945	.	NA	-	.	NA	NA	NA	NA	NA	NA	NA	NA	NA
LNCV6_141329_PI430048170	0.00527857	0.474774	4.27953	4.16224	3.81481	P	P	P	5.22806	5.00478	5.27317	P	P	P	LNCV6_141329_PI430048170	mRNA	TTTACCTGCTCCTCAAGCCTTATTAAACACAAGAGAAGTCATACTGGAGACAGACCTACA	NM_001159522	RefSeq	chr7	+	64045442	64078549	ZNF727	442319	zinc finger protein 727	GO:0006355|GO:0005634|GO:0003677|GO:0046872|GO:0006351	.	NA	-	.	NA	NA	NA	NA	NA	NA	NA	NA	NA
LNCV6_133809_PI430048170	0.000287303	2.60252	8.80648	8.96764	8.84774	P	P	P	7.48484	7.53316	7.46826	P	P	P	LNCV6_133809_PI430048170	mRNA	GCTGAAGTTGTGTGTACAAGACTCTTGACAGTTGTGCTTCTCTAGGAGGTTGGGTTTTTT	NM_001718	RefSeq	chr6	+	7726777	7881728	BMP6	654	bone morphogenetic protein 6	GO:0051216|GO:0001654|GO:0050714|GO:0060395|GO:0005615|GO:0006879|GO:0030539|GO:0005737|GO:0006955|GO:0006954|GO:0045944|GO:0043408|GO:0010039|GO:0032026|GO:0032332|GO:0032526|GO:0050679|GO:0014823|GO:0030501|GO:0046982|GO:0001822|GO:0031988|GO:0010862|GO	.	NA	-	.	NA	NA	NA	NA	NA	NA	NA	NA	NA
LNCV6_141680_PI430048170	0.00520003	0.109157	0.357239	0.300674	0.314633	A	A	A	3.05191	3.54672	3.85135	P	P	P	LNCV6_141680_PI430048170	mRNA	GTGAACATGTACAAGGAAGTGATGGAGAGAGATCACCTTCAAGACATACAGAGGAAAAGA	NM_024867	RefSeq	chr5	+	35617886	35814611	SPEF2	79925	sperm flagellar 2, transcript variant 1	GO:0009566|GO:0060541|GO:0035082|GO:0005794|GO:0002177|GO:0097225|GO:0046983|GO:0010259|GO:0007283|GO:0002520|GO:0048702|GO:0048854	.	NA	-	.	NA	NA	NA	NA	NA	NA	NA	NA	NA
LNCV6_140386_PI430048170	0.000169147	17.2718	4.64285	4.62528	4.255	P	P	P	0.188056	0.183616	0.770516	A	A	A	LNCV6_140386_PI430048170	mRNA	ATAGTGATGGTAAGGCAAGATTCTAGCAAAGAGAGATGGGAGATAAATGGCTGAGAGTTC	NM_153210	RefSeq	chr17	+	9645536	9729686	USP43	124739	ubiquitin specific peptidase 43, transcript variant 1	GO:0004197|GO:0016579|GO:0004843|GO:0061136|GO:0043161	.	NA	-	.	NA	NA	NA	NA	NA	NA	NA	NA	NA
LNCV6_130223_PI430048170	0.00437466	4.1403	4.10043	4.13385	3.4406	P	P	P	1.69076	1.83309	2.07529	A	A	A	LNCV6_130223_PI430048170	mRNA	GCGCTGTTTCCTTCACAAATTAGACATTGGTTTGGGAAACAATGTAGCCTCGTTAAACAT	NM_005440	RefSeq	chr17	+	43025240	43032041	RND2	8153	Rho family GTPase 2	GO:0005515|GO:0007165|GO:0047485|GO:0007264|GO:0008152|GO:0003924|GO:0005525|GO:0002080|GO:0005769|GO:0048672	.	NA	-	.	NA	NA	NA	NA	NA	NA	NA	NA	NA
LNCV6_137474_PI430048170	0.0447546	3.31699	3.66167	3.69011	3.97097	P	P	P	2.5106	2.20321	1.09119	A	A	A	LNCV6_137474_PI430048170	mRNA	GAAGCTTTCAGATAAGTTTAGGCTATTCAACTTTTCTAAAGAGATGGTTGGTTCACCTAA	NM_031913	RefSeq	chr3	+	138434572	138478414	ESYT3	83850	extended synaptotagmin-like protein 3	GO:0005515|GO:0005543|GO:0005887|GO:0006869|GO:0044232|GO:0031227|GO:0046872|GO:0031234	.	NA	-	.	NA	NA	NA	NA	NA	NA	NA	NA	NA
LNCV6_133623_PI430048170	0.00161236	2.20896	14.4529	14.1968	14.2287	P	P	P	13.1372	13.1031	13.2193	P	P	P	LNCV6_133623_PI430048170	mRNA	TTTCCTTCCCCATCTCTTGTACACATTTTAATAAAATAAGGGTTGGCTTCTGAACTACAA	NM_015430	RefSeq	chr11	-	35431828	35526031	PAMR1	25891	peptidase domain containing associated with muscle regeneration 1, transcript variant 1	GO:0008152|GO:0005576|GO:0003824	.	NA	-	.	NA	NA	NA	NA	NA	NA	NA	NA	NA
LNCV6_144711_PI430048170	0.000105638	0.0440379	5.19192	5.01004	4.67473	P	P	P	9.58219	9.52678	9.31641	P	P	P	LNCV6_144711_PI430048170	mRNA	GCAATTGTTAATATGACCTGGTCCTATGGGGTAGAACTTAGGAAAAATAAAGTTGGTTCT	NM_080826	RefSeq	chr20	+	13221770	13300650	ISM1	140862	isthmin 1, angiogenesis inhibitor	GO:0005576	.	NA	-	.	NA	NA	NA	NA	NA	NA	NA	NA	NA
LNCV6_128749_PI430048170	0.00682969	0.418474	3.23197	2.98536	3.3841	P	P	P	4.4845	4.42372	4.49038	P	P	P	LNCV6_128749_PI430048170	mRNA	GGGGAAAAAAGTAGGCTGTTTTCCTGATAGGTCTAGCCATTCATTCAGTAAACCATATTG	NM_018718	RefSeq	chr7	-	130393770	130441210	CEP41	95681	centrosomal protein 41kDa, transcript variant 1	GO:0005515|GO:0005813|GO:0006996|GO:0005814|GO:0072372|GO:0015031|GO:0036064|GO:0005829|GO:0018095|GO:0042384|GO:0016020|GO:0000086|GO:0000278	.	NA	-	.	NA	NA	NA	NA	NA	NA	NA	NA	NA
LNCV6_134785_PI430048170	0.000212089	0.0308119	6.41261	6.47664	6.15306	P	P	P	11.3565	11.3474	11.4183	P	P	P	LNCV6_134785_PI430048170	mRNA	TTCCCAGTGGGGTGGACAGTATATCAGATGGTCAGAACAAATAAAGTTCAGTGTCAAATG	NM_003637	RefSeq	chr1	-	145891207	145910189	ITGA10	8515	integrin, alpha 10, transcript variant 1	GO:0008305|GO:0034680|GO:0007160|GO:0005886|GO:0030198|GO:0007596|GO:0007411|GO:0007229|GO:0005518|GO:0046872	.	NA	-	.	NA	NA	NA	NA	NA	NA	NA	NA	NA
LNCV6_132649_PI430048170	0.0110106	7.38064	5.80684	5.85312	5.65535	P	P	P	3.0524	3.24966	2.1499	P	P	A	LNCV6_132649_PI430048170	mRNA	GCTTCAGGAAAACTGCTCTTTTGTAAAAAGAATAGCGATGACATTTTCTAATGTGCAGAA	NM_030965	RefSeq	chr1	+	76867500	77064052	ST6GALNAC5	81849	ST6 (alpha-N-acetyl-neuraminyl-2,3-beta-galactosyl-1,3)-N-acetylgalactosaminide alpha-2,6-sialyltransferase 5	GO:0001665|GO:0009312|GO:0008373|GO:0000139|GO:0006688|GO:0016021|GO:0006488|GO:0044267|GO:0043687|GO:0018279	.	NA	-	.	NA	NA	NA	NA	NA	NA	NA	NA	NA
LNCV6_133878_PI430048170	0.00466634	5.35944	4.46607	4.65244	4.53629	P	P	P	1.69274	2.35417	2.26309	A	A	A	LNCV6_133878_PI430048170	mRNA	AAGCAGTAAAAGTAAATGAATCCCACCTTTACTAAAACACTTTCTCTGAACCCCCCTTGC	NM_005386	RefSeq	chr20	+	37521204	37523688	NNAT	4826	neuronatin, transcript variant 1	GO:0009249|GO:0007420|GO:0030182|GO:0006810	.	NA	-	.	NA	NA	NA	NA	NA	NA	NA	NA	NA
LNCV6_128282_PI430048170	0.0011959	0.400074	8.47574	8.53259	8.32555	P	P	P	9.76358	9.79951	9.74307	P	P	P	LNCV6_128282_PI430048170	mRNA	CTGCTGTTCGTGACTCAGAAACAGAAGAAAAACACTGAGAAAAAGCATTAAAAATAAGCC	NM_001670	RefSeq	chr22	-	19969878	20016786	ARVCF	421	armadillo repeat gene deleted in velocardiofacial syndrome	GO:0016339|GO:0005622|GO:0005515|GO:0016337|GO:0005737|GO:0030054|GO:0005886|GO:0007275|GO:0005654|GO:0007155	.	NA	-	.	NA	NA	NA	NA	NA	NA	NA	NA	NA
LNCV6_141873_PI430048170	0.000148703	0.140671	1.95423	2.23367	2.39583	A	A	A	4.93736	4.95683	5.1976	P	P	P	LNCV6_141873_PI430048170	mRNA	GTCCGAAGCTGCCAGGAAGAAGAACAGAACTTTGTGTGTTTATTTCATGATAAAGTGATT	NM_002183	RefSeq	chrY	+	1336615	1382689	IL3RA	3563	interleukin 3 receptor, alpha (low affinity), transcript variant 1	GO:0038156|GO:0005886|GO:0004912|GO:0016021|GO:0036016	.	NA	-	.	NA	NA	NA	NA	NA	NA	NA	NA	NA
LNCV6_139603_PI430048170	0.00122506	0.402456	5.5922	5.31989	5.22381	P	P	P	6.68238	6.82409	6.58434	P	P	P	LNCV6_139603_PI430048170	mRNA	CACCGTTAGCCTGGACAGTTGCTTATGGCATCGATAGGGTTGGATAATATTCTGGGATTT	NM_007250	RefSeq	chrX	+	56232388	56287889	KLF8	11279	Kruppel-like factor 8, transcript variant 1	GO:0006355|GO:0005634|GO:0003677|GO:0046872|GO:0006351	.	NA	-	.	NA	NA	NA	NA	NA	NA	NA	NA	NA
LNCV6_113775_PI430048170	0.0487781	0.341217	1.6467	1.86338	0.428574	A	A	A	3.53029	2.73027	2.48412	P	P	P	LNCV6_113775_PI430048170	mRNA	GCCACCCAGAAAGCTATGAATTCCAATATACACCACTGATCGTGCAAGTTAGGGTTTTTT	NM_001033723	RefSeq	chr8	-	80628450	80874781	ZNF704	619279	zinc finger protein 704	GO:0046872	.	NA	-	.	NA	NA	NA	NA	NA	NA	NA	NA	NA
LNCV6_141068_PI430048170	0.00111081	0.0824929	10.0634	9.85889	9.60722	P	P	P	13.4327	13.4906	13.4402	P	P	P	LNCV6_141068_PI430048170	mRNA	GATAGAGTTGAGGAGTGTGAGGCTGTTAGACTGTTAGATTTAAATGTATATTGATGAGAT	NM_000557	RefSeq	chr20	-	35433348	35438190	GDF5	8200	growth differentiation factor 5	GO:0005515|GO:0035137|GO:0035136|GO:0005886|GO:0050680|GO:0007267|GO:0030326|GO:0060395|GO:0005615|GO:0042802|GO:0043524|GO:0030198|GO:0002062|GO:0040014|GO:0043408|GO:0007179|GO:0032332|GO:0048468|GO:0010862|GO:0005576|GO:0042981|GO:0030509|GO:0005160|GO	.	NA	-	.	NA	NA	NA	NA	NA	NA	NA	NA	NA
LNCV6_134284_PI430048170	0.0309022	0.445321	2.28671	1.95458	1.93056	A	A	A	2.98899	3.69039	2.88209	P	P	P	LNCV6_134284_PI430048170	mRNA	CTATTAGTAGAACCAAATTTCTAAGCTGTGGCGTGCTGAAAATAAAATGCTTATGAAGCA	NM_001463	RefSeq	chr2	-	182833275	182866770	FRZB	2487	frizzled-related protein	GO:0042813|GO:0017147|GO:0010721|GO:0030308|GO:0043065|GO:0008285|GO:0004930|GO:0030178|GO:0005615|GO:0070367|GO:0060029|GO:0061053|GO:0001501|GO:0016020|GO:0014033|GO:0045600|GO:0090103|GO:0061037|GO:0016021|GO:0090090|GO:0035567	.	NA	-	.	NA	NA	NA	NA	NA	NA	NA	NA	NA
LNCV6_137102_PI430048170	0.00351417	3.32971	12.7549	12.4815	12.382	P	P	P	10.7999	10.7922	10.8458	P	P	P	LNCV6_137102_PI430048170	mRNA	CTATGTGTGACTTTAAACTGTAAAATTAAACACTGCTTTTGTGGGTTCAGTGGGCATAAT	NM_007038	RefSeq	chr21	-	26917911	26967120	ADAMTS5	11096	ADAM metallopeptidase with thrombospondin type 1 motif, 5	GO:0005515|GO:0005578|GO:0005576|GO:0036066|GO:0005178|GO:0006493|GO:0022617|GO:0030198|GO:0006508|GO:0005788|GO:0008270|GO:0004222|GO:0044267|GO:0042742|GO:0008237|GO:0043687	.	NA	-	.	NA	NA	NA	NA	NA	NA	NA	NA	NA
LNCV6_138790_PI430048170	0.00159704	25.9133	8.43823	8.50484	8.3119	P	P	P	3.2121	3.90898	3.94283	P	P	P	LNCV6_138790_PI430048170	mRNA	GTCAGATGCCCTAGTTAATCATGTAATTTAATTCTGGTATTGTGAGTGGTTAGCAATCAA	NM_152754	RefSeq	chr7	-	84995555	85121931	SEMA3D	223117	sema domain, immunoglobulin domain (Ig), short basic domain, secreted, (semaphorin) 3D	GO:0016020|GO:0005576|GO:0004872|GO:0030154|GO:0007399	.	NA	-	.	NA	NA	NA	NA	NA	NA	NA	NA	NA
LNCV6_136968_PI430048170	0.00519292	0.113092	0.69453	1.45193	0.395709	A	A	A	4.04388	4.24421	3.8766	P	P	P	LNCV6_136968_PI430048170	mRNA	CTCACCACTTACCCGGGATAGTAAACATGATACACATCAATAAAGGCAGACTTTATTGTG	NM_178468	RefSeq	chr20	-	35285730	35292422	FAM83C	128876	family with sequence similarity 83, member C	NA	.	NA	-	.	NA	NA	NA	NA	NA	NA	NA	NA	NA
LNCV6_144594_PI430048170	0.00201929	0.0719586	2.8299	2.13388	2.58058	P	A	A	6.25771	6.39785	6.35917	P	P	P	LNCV6_144594_PI430048170	mRNA	AGGAACAAGATTCTCACAGCCACAGTGGACAATGCCAATGTCCTTCTGCAGATTGACAAT	NM_000526	RefSeq	chr17	-	41582278	41586895	KRT14	3861	keratin 14, type I	GO:0005515|GO:0005882|GO:0042633|GO:0034329|GO:0007568|GO:0005634|GO:0010043|GO:0071944|GO:0005829|GO:0005737|GO:0008544|GO:0010212|GO:0030855|GO:0045110|GO:0005200|GO:0031581|GO:0045095|GO:0070062	.	NA	-	.	NA	NA	NA	NA	NA	NA	NA	NA	NA
LNCV6_82921_PI430048170	1.72647e-06	2.70366	10.3154	10.3706	10.2967	P	P	P	8.86869	8.94065	8.86846	P	P	P	LNCV6_82921_PI430048170	mRNA	TGTGCCTGATGCCAGGACAGCTGTGCTCTCAGATGTAAATAGAGCAACCTATATAAACCT	NM_005952	RefSeq	chr16	+	56682469	56684196	MT1X	4501	metallothionein 1X	GO:0071294|GO:0048471|GO:0007263|GO:0006882|GO:0005634|GO:0046872|GO:0036018|GO:0010273|GO:0005737|GO:0010038|GO:0008270|GO:0071276|GO:0045926	.	NA	-	.	NA	NA	NA	NA	NA	NA	NA	NA	NA
LNCV6_73378_PI430048170	0.000906361	2.93457	6.33306	6.76183	6.63913	P	P	P	5.2095	4.99359	4.88548	P	P	P	LNCV6_73378_PI430048170	mRNA	CTCTGCTCTTCTGTGATCTTAAAACAAAATGAAATAAACGTGAAAAGGAGATGTGTCTTC	NM_002338	RefSeq	chr3	-	115802362	116445538	LSAMP	4045	limbic system-associated membrane protein	GO:0005515|GO:0043005|GO:0016337|GO:0050767|GO:0009986|GO:0005886|GO:0005911|GO:0043025|GO:0031225|GO:0035641|GO:0007399	.	NA	-	.	NA	NA	NA	NA	NA	NA	NA	NA	NA
LNCV6_137330_PI430048170	0.00173853	2.1653	4.98459	5.36611	5.20049	P	P	P	4.20074	4.13006	3.88293	P	P	P	LNCV6_137330_PI430048170	mRNA	TGCCCGCTTCCAAATCCATCTGCGTGTAGAATGTACTGTAGATTGTAAGAATGTAATATA	NM_133448	RefSeq	chr12	-	129071725	129903667	TMEM132D	121256	transmembrane protein 132D	GO:0005515|GO:0010923|GO:0016021	.	NA	-	.	NA	NA	NA	NA	NA	NA	NA	NA	NA
LNCV6_141081_PI430048170	0.00141757	0.391194	5.58199	5.68964	5.33814	P	P	P	6.84548	7.00197	6.84067	P	P	P	LNCV6_141081_PI430048170	mRNA	GGTGAAGTTTGTATGTTTACCTAATATTACCTGTTTTGTATACCTGAGAGCCTGCTATGT	NM_002607	RefSeq	chr7	-	497259	519844	PDGFA	5154	platelet-derived growth factor alpha polypeptide, transcript variant 1	GO:0005515|GO:0050730|GO:0005518|GO:0005615|GO:0042803|GO:0010035|GO:0007173|GO:0030198|GO:0032956|GO:0009887|GO:0051781|GO:0007179|GO:0070374|GO:0001942|GO:0032355|GO:0035793|GO:0048839|GO:0060683|GO:0030335|GO:0048286|GO:0046982|GO:0009986|GO:0048407|GO	.	NA	-	.	NA	NA	NA	NA	NA	NA	NA	NA	NA
LNCV6_142743_PI430048170	0.00459831	2.19405	5.05949	5.43417	5.09645	P	P	P	3.98232	4.34498	3.84511	P	P	P	LNCV6_142743_PI430048170	mRNA	GTGGCCTAGACTTCTGAGTAATTAATAAAGAAAAAGAAGTACCCTTTGGCCTACAAAAAA	NM_002031	RefSeq	chr6	-	115941529	116060758	FRK	2444	fyn-related Src family tyrosine kinase	GO:0005515|GO:0008285|GO:0030036|GO:0005102|GO:0005634|GO:0005524|GO:0030154|GO:0031234|GO:0005622|GO:0005737|GO:0016477|GO:0045087|GO:0042127|GO:0006468|GO:0038083|GO:0004715|GO:0007169|GO:0070062	.	NA	-	.	NA	NA	NA	NA	NA	NA	NA	NA	NA
LNCV6_130446_PI430048170	0.00200187	2.0439	6.44385	6.56295	6.40754	P	P	P	5.43944	5.44746	5.43807	P	P	P	LNCV6_130446_PI430048170	mRNA	CACAGTCAAGAATTAGCAGAAACCCTCTGCATTTACAAACACTTTGTGCTATAAAAAAGT	NM_004631	RefSeq	chr1	-	53242369	53328149	LRP8	7804	low density lipoprotein receptor-related protein 8, apolipoprotein e receptor, transcript variant 1	GO:0006629|GO:0005515|GO:0008035|GO:0030424|GO:0005886|GO:0007603|GO:0061098|GO:0019221|GO:0050731|GO:0030425|GO:0071397|GO:0030229|GO:0043025|GO:0006508|GO:0061003|GO:1900006|GO:0021541|GO:0042493|GO:0005875|GO:0005509|GO:0050804|GO:0014069|GO:0005576|GO	.	NA	-	.	NA	NA	NA	NA	NA	NA	NA	NA	NA
LNCV6_131307_PI430048170	0.00103863	5.80611	4.66095	4.59273	4.51252	P	P	P	1.78586	2.16237	2.17614	A	A	A	LNCV6_131307_PI430048170	mRNA	GCTGCAAATATGCTTTCCAAGTGCTTTGCTTTCAAATTTTGTTTATGGTGCTTTTTGACA	NM_015351	RefSeq	chr14	+	70641786	70675360	TTC9	23508	tetratricopeptide repeat domain 9	NA	.	NA	-	.	NA	NA	NA	NA	NA	NA	NA	NA	NA
LNCV6_131407_PI430048170	0.00105516	0.449684	12.9204	12.7835	12.6025	P	P	P	13.9221	13.8272	14.0267	P	P	P	LNCV6_131407_PI430048170	mRNA	TGAACAGAAACCAATACTGCTGTGCACTGAGAATAAAAACTCATGCCCACTTGTAAAAAA	NM_001001396	RefSeq	chr1	+	203626786	203744081	ATP2B4	493	ATPase, Ca++ transporting, plasma membrane 4, transcript variant 1	GO:0005515|GO:0050998|GO:1900082|GO:0005516|GO:0030346|GO:0030018|GO:0005886|GO:0046872|GO:0055074|GO:0033138|GO:0034220|GO:0045019|GO:0097110|GO:2000481|GO:0006357|GO:0006874|GO:0030315|GO:0070885|GO:0055085|GO:0005524|GO:0010751|GO:0005388|GO:0043234|GO	.	NA	-	.	NA	NA	NA	NA	NA	NA	NA	NA	NA
LNCV6_127268_PI430048170	6.94942e-05	7.00734	11.96	11.8516	11.5585	P	P	P	9.1519	9.01742	8.77901	P	P	P	LNCV6_127268_PI430048170	mRNA	CCTGTTATGCTTACAAAATGGTGATGGCTTATGGAAGGCTGTTAAATTAATATTCCTGTT	NM_145244	RefSeq	chr4	-	100185869	100190498	DDIT4L	115265	DNA-damage-inducible transcript 4-like	GO:0005737|GO:0009968	.	NA	-	.	NA	NA	NA	NA	NA	NA	NA	NA	NA
LNCV6_136762_PI430048170	3.55412e-05	0.113444	10.2135	10.1919	9.95002	P	P	P	13.3921	13.3334	13.0403	P	P	P	LNCV6_136762_PI430048170	mRNA	GCCACGTACTCAGAGTATAACAATGTGTTCTCATTAAAAAATACATCCCACGGAAACCTC	NM_001204375	RefSeq	chr5	+	32711331	32791724	NPR3	4883	natriuretic peptide receptor 3, transcript variant 1	GO:0033688|GO:0048015|GO:0042562|GO:0007200|GO:0008528|GO:0048662|GO:0030157|GO:0007194|GO:0007193|GO:0042803|GO:0001501|GO:0016941|GO:0051000|GO:0005887|GO:0008217|GO:0002158|GO:0017046|GO:0035810|GO:0070062	.	NA	-	.	NA	NA	NA	NA	NA	NA	NA	NA	NA
LNCV6_113673_PI430048170	0.00422973	2.07689	13.943	13.88	13.6746	P	P	P	12.7795	12.8155	12.752	P	P	P	LNCV6_113673_PI430048170	mRNA	ATGCTGCTCAAGTGGAAAGGGTATTGCTAAAAGGATGTTTCCAAAAATCTTGTATATAAG	NM_002009	RefSeq	chr15	+	49423177	49487326	FGF7	2252	fibroblast growth factor 7	GO:0008286|GO:0005515|GO:0010838|GO:0008284|GO:0051549|GO:0010463|GO:0050731|GO:0031069|GO:0060665|GO:0007173|GO:0060501|GO:0051781|GO:0008201|GO:0050679|GO:0048011|GO:0005794|GO:0031532|GO:0048015|GO:0009611|GO:0005576|GO:0005104|GO:0042056|GO:0050918|GO	.	NA	-	.	NA	NA	NA	NA	NA	NA	NA	NA	NA
LNCV6_143427_PI430048170	5.72896e-05	0.403514	4.46654	4.47782	4.32655	P	P	P	5.78833	5.74279	5.67013	P	P	P	LNCV6_143427_PI430048170	mRNA	CGTATCTTCTTTTGGTTCCCTCAAAGGTAAAAATAAGACCCAGAATCTGAGTAAATCTAT	NM_001047160	RefSeq	chr10	+	5412550	5459056	NET1	10276	neuroepithelial cell transforming 1, transcript variant 1	GO:0051056|GO:0048011|GO:0070301|GO:0043065|GO:0005886|GO:0007264|GO:0005634|GO:0097190|GO:0001558|GO:0071479|GO:0005829|GO:0005085|GO:0007165|GO:1900026|GO:0032321|GO:0017049|GO:0005089|GO:0051451	.	NA	-	.	NA	NA	NA	NA	NA	NA	NA	NA	NA
LNCV6_127905_PI430048170	0.000576323	0.0300961	4.47746	4.61756	4.92266	P	P	P	9.74316	9.70991	9.76342	P	P	P	LNCV6_127905_PI430048170	mRNA	CGCCCACACTGATGGTTTTGCACTGGTTTTTGTGAATGTTTCTTACAAAAAGAAAAAGGA	NM_130783	RefSeq	chr11	+	44764425	44932426	TSPAN18	90139	tetraspanin 18	GO:0016021	.	NA	-	.	NA	NA	NA	NA	NA	NA	NA	NA	NA
LNCV6_143083_PI430048170	0.0025161	0.423043	7.79822	7.70069	7.68837	P	P	P	9.03753	9.07948	8.77809	P	P	P	LNCV6_143083_PI430048170	mRNA	AGGAGGTGCTGATCCAGGAGTGGTTCACCCTGGTCAACAAGAAGAACGCTCTCATCCGGA	NM_001099409	RefSeq	chr11	+	65576037	65592645	EHBP1L1	254102	EH domain binding protein 1-like 1	GO:0008150|GO:0003674|GO:0016020	.	NA	-	.	NA	NA	NA	NA	NA	NA	NA	NA	NA
LNCV6_135724_PI430048170	0.0133792	9.82432	5.15164	5.03855	4.39037	P	P	P	2.46077	0.655029	1.01333	A	A	A	LNCV6_135724_PI430048170	mRNA	GGGATATTATGAAGGGCCTTGAGCATCTGGATTCTGCCTAATAAAAAACATTTATTTTCA	NM_000518	RefSeq	chr11	-	5225465	5227071	HBB	3043	hemoglobin, beta	GO:0005515|GO:0042542|GO:0072562|GO:0044281|GO:0051291|GO:0070293|GO:0005829|GO:0045429|GO:0030492|GO:0031838|GO:0004601|GO:0050880|GO:0030185|GO:0071682|GO:0042744|GO:0010942|GO:0031720|GO:0070062|GO:0005833|GO:0005506|GO:0005576|GO:0006898|GO:0015671|GO	.	NA	-	.	NA	NA	NA	NA	NA	NA	NA	NA	NA
LNCV6_119670_PI430048170	0.000768903	0.227122	4.89313	4.92192	4.90169	P	P	P	7.03408	7.15679	6.93265	P	P	P	LNCV6_119670_PI430048170	mRNA	AGTCTCTTAAACAAAAGCAAAAGAATAAGCTTCGGGCGCTGTAGTACCTGCCAGCTTTCG	NM_001199771	RefSeq	chr12	+	55720366	55724742	RDH5	5959	retinol dehydrogenase 5 (11-cis/9-cis), transcript variant 1	GO:0007603|GO:0042572|GO:0005789|GO:0005788|GO:0004745|GO:0007601|GO:0001523|GO:0044297|GO:0055114	.	NA	-	.	NA	NA	NA	NA	NA	NA	NA	NA	NA
LNCV6_144932_PI430048170	0.000382122	2.9089	9.02816	8.93621	9.01104	P	P	P	7.5146	7.51317	7.31925	P	P	P	LNCV6_144932_PI430048170	mRNA	GGTGCATGTAAATACAGTATGCTCTTTGGATGTAAATCTTAGAAATGCAGTGTGAATGTA	NM_001876	RefSeq	chr11	-	68754882	68841931	CPT1A	1374	carnitine palmitoyltransferase 1A (liver), transcript variant 1	GO:0014070|GO:0001676|GO:0006635|GO:0004095|GO:0042493|GO:0006853|GO:0005743|GO:0005741|GO:0044281|GO:0042802|GO:0071398|GO:0005739|GO:0050796|GO:0016020|GO:0030855|GO:0032000|GO:0006006|GO:0006641|GO:0007623|GO:0051260|GO:0042755|GO:0031307|GO:0009437|GO	.	NA	-	.	NA	NA	NA	NA	NA	NA	NA	NA	NA
LNCV6_131664_PI430048170	0.00220668	2.61556	7.9012	7.62123	7.48181	P	P	P	6.38726	6.1708	6.30862	P	P	P	LNCV6_131664_PI430048170	mRNA	ACTATGTTATCCATCCTGAGTTTGTGTCTGAGACCTATCCCGACTATCGTTGCTGGTAGA	NM_032596	RefSeq	chr9	-	34379019	34397851	C9orf24	84688	chromosome 9 open reading frame 24, transcript variant 1	GO:0048471|GO:0043014|GO:0002177|GO:0005634|GO:0007283|GO:0043623|GO:0030154	.	NA	-	.	NA	NA	NA	NA	NA	NA	NA	NA	NA
LNCV6_141335_PI430048170	0.000192827	0.233124	5.13129	5.52231	5.33194	P	P	P	7.49321	7.53947	7.26735	P	P	P	LNCV6_141335_PI430048170	mRNA	ACACTGTAAACGACACAAGAGAACAAGAATAAAACAATAACTGTGTGTGTTCTGGCTGAG	NM_001175	RefSeq	chr12	-	14942015	14961628	ARHGDIB	397	Rho GDP dissociation inhibitor (GDI) beta	GO:0051056|GO:0030036|GO:0007264|GO:0006928|GO:0007275|GO:0007266|GO:0005829|GO:0043547|GO:0050790|GO:0005737|GO:0006955|GO:0007162|GO:0016023|GO:0005856|GO:0005094|GO:0070062|GO:0005096	.	NA	-	.	NA	NA	NA	NA	NA	NA	NA	NA	NA
LNCV6_127717_PI430048170	1.37039e-06	0.0107103	2.32113	2.46658	2.37685	A	P	A	8.92428	8.97299	8.90476	P	P	P	LNCV6_127717_PI430048170	mRNA	AGCCAAAGATTTTATTATGTTCAGAAACCTGTAGTCTGAAATAAAGTGTACACTGTGCTC	NM_001426	RefSeq	chr2	-	118842170	118848183	EN1	2019	engrailed homeobox 1	GO:0005634|GO:0009954|GO:0000122|GO:0009953|GO:0042220|GO:0000978|GO:0009653|GO:0001078|GO:0001501|GO:0035264|GO:0016020|GO:0048666|GO:0045944|GO:0043473|GO:0030917|GO:0030901|GO:0035115|GO:0030902	.	NA	-	.	NA	NA	NA	NA	NA	NA	NA	NA	NA
LNCV6_71360_PI430048170	0.000774199	2.81588	7.92012	7.79407	7.97731	P	P	P	6.49963	6.49591	6.20143	P	P	P	LNCV6_71360_PI430048170	mRNA	ACAAGCACAGCGACGAGTACAAGATCCGGCGCGAGCGCAACAACATCGCCGTGCGCAAGA	NM_005194	RefSeq	chr20	+	50190582	50192691	CEBPB	1051	CCAAT/enhancer binding protein (C/EBP), beta, transcript variant 1	GO:0005515|GO:0060850|GO:0000790|GO:0034976|GO:0003700|GO:0006366|GO:0003705|GO:0045408|GO:0005634|GO:0035259|GO:0042803|GO:0016363|GO:0043524|GO:0005737|GO:0006955|GO:0060644|GO:0006954|GO:0071230|GO:0045944|GO:0030182|GO:0032496|GO:0006355|GO:0046982|GO	.	NA	-	.	NA	NA	NA	NA	NA	NA	NA	NA	NA
LNCV6_133476_PI430048170	5.43377e-05	0.210014	4.97167	5.04336	4.89289	P	P	P	7.14816	7.14632	7.36097	P	P	P	LNCV6_133476_PI430048170	mRNA	AGGCTGCTCAATGAGATAATTGCTGATTTTGATGAGCTGCTCTCCAAGCCCAAGTTCAGT	NM_001198568	RefSeq	chr14	-	24318348	24335071	ADCY4	196883	adenylate cyclase 4, transcript variant 3	GO:0005515|GO:0005886|GO:0007268|GO:0007202|GO:0044281|GO:0007193|GO:0030425|GO:0046872|GO:0035556|GO:0005737|GO:0007173|GO:0071377|GO:0006171|GO:0006833|GO:0034199|GO:0048011|GO:0055085|GO:0005524|GO:0003091|GO:0007165|GO:0006112|GO:0004016|GO:0016020|GO	.	NA	-	.	NA	NA	NA	NA	NA	NA	NA	NA	NA
LNCV6_132273_PI430048170	6.30945e-05	2070.4	11.4881	11.2013	11.0755	P	P	P	0.297659	0.243927	0.206283	A	A	A	LNCV6_132273_PI430048170	mRNA	AGTGCCATGGGGGTGAAACCAGTGCTAAATGGAGGTAAAATAAAGTTTGTAAGAGCCCAA	NM_024768	RefSeq	chr3	+	129001628	129040742	EFCC1	79825	EF-hand and coiled-coil domain containing 1	GO:0005509	.	NA	-	.	NA	NA	NA	NA	NA	NA	NA	NA	NA
LNCV6_128796_PI430048170	0.0009202	3.22632	9.21657	9.23344	9.16079	P	P	P	7.46775	7.40776	7.65494	P	P	P	LNCV6_128796_PI430048170	mRNA	GGGCAGAAGAAAGAAATAAACCTCATCCTATATTTTACAAAGCATGTGAATTCTGGCATT	NM_014762	RefSeq	chr1	-	54849626	54887248	DHCR24	1718	24-dehydrocholesterol reductase	GO:0006695|GO:0008285|GO:0008762|GO:0005783|GO:0050660|GO:0007265|GO:0005634|GO:0044281|GO:0016628|GO:0005829|GO:0030539|GO:0008104|GO:0050614|GO:0042605|GO:0009888|GO:0061024|GO:0007050|GO:0009725|GO:0043154|GO:0005856|GO:0006979|GO:0042987|GO:0043066|GO	.	NA	-	.	NA	NA	NA	NA	NA	NA	NA	NA	NA
LNCV6_95119_PI430048170	0.0094092	0.455357	11.9053	11.796	11.5233	P	P	P	12.8759	12.9025	12.8772	P	P	P	LNCV6_95119_PI430048170	mRNA	GCCTTATCTAAATCACCAGAGACCAAACAAGGACTAATCCAATACCTCTTGGATTTTATT	NM_000270	RefSeq	chr14	+	20469378	20478006	PNP	4860	purine nucleoside phosphorylase	GO:0046638|GO:0004731|GO:0034356|GO:0044281|GO:0005829|GO:0005622|GO:0006955|GO:0006195|GO:0005737|GO:0001882|GO:0008144|GO:0042102|GO:0043101|GO:0002060|GO:0005856|GO:0070062|GO:0070970|GO:0042493|GO:0055086|GO:0006738|GO:0034418|GO:0006148|GO:0006139|GO	.	NA	-	.	NA	NA	NA	NA	NA	NA	NA	NA	NA
LNCV6_143987_PI430048170	5.35009e-05	0.367559	9.03531	9.11329	9.0317	P	P	P	10.4156	10.5335	10.5605	P	P	P	LNCV6_143987_PI430048170	mRNA	CGCCAAAATTCGCTATGTTTACAGTGATACTATTAAGAAAATGAATGTGATTCTGCTCTG	NM_000147	RefSeq	chr1	-	23845080	23868369	FUCA1	2517	fucosidase, alpha-L- 1, tissue	GO:0005737|GO:0004560|GO:0006027|GO:0016139|GO:0042806|GO:0006004|GO:0005764|GO:0070062	.	NA	-	.	NA	NA	NA	NA	NA	NA	NA	NA	NA
LNCV6_135270_PI430048170	0.0120857	0.339538	2.3128	2.82236	3.17184	A	P	P	4.45347	4.49764	4.12983	P	P	P	LNCV6_135270_PI430048170	mRNA	CTCCTTGGGCATTCGTACTTAGGATTCAATAGAAACATGTACAGGGTAAACAATTTTTTA	NM_015900	RefSeq	chr3	+	119597847	119629811	PLA1A	51365	phospholipase A1 member A, transcript variant 1	GO:0016042|GO:0006629|GO:0008970|GO:0006658|GO:0002080|GO:0070062	.	NA	-	.	NA	NA	NA	NA	NA	NA	NA	NA	NA
LNCV6_142678_PI430048170	3.1202e-05	0.335398	7.07233	7.0886	7.20421	P	P	P	8.65474	8.69963	8.74125	P	P	P	LNCV6_142678_PI430048170	mRNA	AACTTCGTTCTGTAGAGAACTATTTTTGTTTGTATTCACTGTCCCCTGCAAGGGGGACGG	NM_032536	RefSeq	chr9	+	132161946	132242833	NTNG2	84628	netrin G2	GO:0005515|GO:0030424|GO:0003674|GO:0007409|GO:0046658	.	NA	-	.	NA	NA	NA	NA	NA	NA	NA	NA	NA
LNCV6_135229_PI430048170	0.00528064	0.145872	1.46749	2.35276	1.98686	A	P	A	4.83149	4.81916	4.61149	P	P	P	LNCV6_135229_PI430048170	mRNA	CGTGGGGCTTGTAATCTGTCTCTTTCTACTATTTACATCTGATTTAAATAAACCATTCCA	NM_013416	RefSeq	chr22_KI270877v1_alt	+	81781	101331	NCF4	4689	neutrophil cytosolic factor 4, 40kDa, transcript variant 2	GO:0005515|GO:0048010|GO:0002474|GO:0051701|GO:0042590|GO:0032266|GO:0043085|GO:0005829|GO:0006955|GO:0016020|GO:0016176|GO:0046983|GO:0002479|GO:0032010|GO:0043020|GO:0090382|GO:0010008|GO:0055114	.	NA	-	.	NA	NA	NA	NA	NA	NA	NA	NA	NA
LNCV6_137318_PI430048170	3.22759e-06	0.118761	7.45715	7.43824	7.40943	P	P	P	10.5429	10.4525	10.5298	P	P	P	LNCV6_137318_PI430048170	mRNA	AAAGCGATTTGAGATGCCAATACCTGTGAATACCTGTTAATAAAGAGCTGTTAAATAGAC	NM_001508	RefSeq	chr2	+	132416573	132646596	GPR39	2863	G protein-coupled receptor 39	GO:0007186|GO:0005886|GO:0005887|GO:0004930|GO:0046872	.	NA	-	.	NA	NA	NA	NA	NA	NA	NA	NA	NA
LNCV6_142082_PI430048170	0.0014754	19.5586	4.88195	4.76626	4.96964	P	P	P	0.112103	0.789281	0.75872	A	A	A	LNCV6_142082_PI430048170	mRNA	TCGGTCAGCGACTGGATGCTCGCCATCAAGGTCCAGTGGAAGTTCTTCAAGAGGAAAGGC	NM_001958	RefSeq	chr20	-	63488011	63499315	EEF1A2	1917	eukaryotic translation elongation factor 1 alpha 2	GO:0005853|GO:0043065|GO:0010035|GO:0043025|GO:0003924|GO:0005634|GO:0005525|GO:0003746|GO:0008135|GO:0006414	.	NA	-	.	NA	NA	NA	NA	NA	NA	NA	NA	NA
LNCV6_139531_PI430048170	0.000944872	0.395011	7.37395	7.02621	7.04307	P	P	P	8.47464	8.6689	8.32658	P	P	P	LNCV6_139531_PI430048170	mRNA	ACGAAGCACAAGTCTGTTAAGCAGAAGGCTCCAAGCTGTATTCTATACTTGGGAATCCTT	NM_058229	RefSeq	chr8	-	123497886	123541253	FBXO32	114907	F-box protein 32, transcript variant 1	GO:0005515|GO:0030018|GO:0016567|GO:0005730|GO:0014894|GO:0071549	.	NA	-	.	NA	NA	NA	NA	NA	NA	NA	NA	NA
LNCV6_127884_PI430048170	0.00116733	2.72626	7.87066	7.81723	7.67436	P	P	P	6.35675	6.35128	6.32025	P	P	P	LNCV6_127884_PI430048170	mRNA	GAGGGTGGTTCCTGTTCTCAGCATCCACTAATATTCAGTCCTGTATATTTTAATAAAATA	NM_013434	RefSeq	chr2	+	95297323	95386077	KCNIP3	30818	Kv channel interacting protein 3, calsenilin, transcript variant 1	GO:0005886|GO:0005783|GO:0015459|GO:0005634|GO:0006886|GO:0030425|GO:0005829|GO:0043523|GO:0032993|GO:0034765|GO:0043679|GO:0071805|GO:0005794|GO:0005244|GO:0006357|GO:0003714|GO:0005509|GO:0005267|GO:0006915|GO:0000122|GO:0008022|GO:0003677|GO:0006351|GO	.	NA	-	.	NA	NA	NA	NA	NA	NA	NA	NA	NA
LNCV6_144629_PI430048170	0.00268447	5.1363	5.92478	5.14271	5.17266	P	P	P	3.3566	3.12618	2.75555	P	P	P	LNCV6_144629_PI430048170	mRNA	TTCAGAACCAGCTGGCGCTGCTGCAGAAGGAACCTTGCGGCCCAGATGAGGAAGGAACCC	NM_021920	RefSeq	chr11_KI270832v1_alt	-	156211	157072	SCT	6343	secretin	GO:0097150|GO:0021542|GO:0043524|GO:0005179|GO:0008542|GO:0005576|GO:0030157|GO:0005575	.	NA	-	.	NA	NA	NA	NA	NA	NA	NA	NA	NA
LNCV6_128044_PI430048170	0.00136048	0.329738	8.40604	8.09669	7.96083	P	P	P	9.80319	9.87018	9.61692	P	P	P	LNCV6_128044_PI430048170	mRNA	GTCACCCTTAGCCCTTCAGATAAGCCTAGCCAGTACATATTTCAGCACAGGCAGTTTTTT	NM_001002901	RefSeq	chr1	+	161721543	161728143	FCRLB	127943	Fc receptor-like B, transcript variant 1	GO:0005737|GO:0050777|GO:0005783	.	NA	-	.	NA	NA	NA	NA	NA	NA	NA	NA	NA
LNCV6_135723_PI430048170	0.000173473	75.4747	8.45411	8.49488	8.07499	P	P	P	2.124	2.47704	1.61954	A	A	A	LNCV6_135723_PI430048170	mRNA	ATGCCTACTTCAAGGGTATGGCTTCTGCCTAATAAAGAATGTTCAGCTCAACTTCCTGAT	NM_000519	RefSeq	chr11	-	5232828	5234628	HBD	3045	hemoglobin, delta	GO:0019825|GO:0005833|GO:0005506|GO:0007596|GO:0005344|GO:0072562|GO:0020037|GO:0015671|GO:0005829	.	NA	-	.	NA	NA	NA	NA	NA	NA	NA	NA	NA
LNCV6_142182_PI430048170	0.00160098	0.46888	3.62727	3.42469	3.71316	P	P	P	4.64613	4.63923	4.76914	P	P	P	LNCV6_142182_PI430048170	mRNA	CAAGCTTGAGTAATGTTCATGCCTGCTTTTCATTGAAATAGAATGAAAAGGTTGCACAAT	NM_001004419	RefSeq	chr12	+	9669707	9699555	CLEC2D	29121	C-type lectin domain family 2, member D, transcript variant 2	GO:0016020|GO:0009986|GO:0005887|GO:0005783|GO:0030246|GO:0007166|GO:0004888	.	NA	-	.	NA	NA	NA	NA	NA	NA	NA	NA	NA
LNCV6_145282_PI430048170	0.00391986	2.11192	3.36771	2.9111	3.17402	P	P	P	1.84044	2.23107	2.15282	A	A	A	LNCV6_145282_PI430048170	mRNA	AGTTCTGAAATGCATTTCGTAAGTCTCCTCAAAAGAGGAGGAGACTTCTGTGGCGGGTTT	NM_001098272	RefSeq	chr5	-	43287469	43313512	HMGCS1	3157	3-hydroxy-3-methylglutaryl-CoA synthase 1 (soluble), transcript variant 1	GO:0006629|GO:0006695|GO:0005886|GO:0009645|GO:0005634|GO:0044281|GO:0014074|GO:0042803|GO:0005829|GO:0071372|GO:0005737|GO:0071397|GO:0008144|GO:0033197|GO:0044255|GO:0004421|GO:0043177|GO:0042493|GO:0046690|GO:0008299|GO:0001889|GO:0007420|GO:0055094|GO	.	NA	-	.	NA	NA	NA	NA	NA	NA	NA	NA	NA
LNCV6_65000_PI430048170	0.000830697	0.373536	3.26175	3.44999	3.39616	P	P	P	4.60132	4.93725	4.81796	P	P	P	LNCV6_65000_PI430048170	mRNA	GCGAAGACGCCAGGTTCAGCATGGGAAAATGGGACTGTGGAAATAAAGTATATGTGTGGA	NM_144577	RefSeq	chr19	-	48296451	48320075	CCDC114	93233	coiled-coil domain containing 114	GO:0005515|GO:0005929|GO:0036157|GO:0036158	.	NA	-	.	NA	NA	NA	NA	NA	NA	NA	NA	NA
LNCV6_129250_PI430048170	0.000141983	3.01171	7.67825	7.55991	7.46746	P	P	P	6.09025	6.01538	5.82298	P	P	P	LNCV6_129250_PI430048170	mRNA	GGGTGCCATTTTGTTTTCAAAAGTTATTCATTGTAATCCACTGTTTTGGCTTTCATGAAC	NM_004681	RefSeq	chrY	+	20575710	20593154	EIF1AY	9086	eukaryotic translation initiation factor 1A, Y-linked, transcript variant 1	GO:0005515|GO:0003743|GO:0006413	.	NA	-	.	NA	NA	NA	NA	NA	NA	NA	NA	NA
LNCV6_134685_PI430048170	0.00233436	0.147082	1.27185	0.854507	0.423037	A	A	A	3.85515	3.44661	3.63833	P	P	P	LNCV6_134685_PI430048170	mRNA	CCAGTTCCACGAGTGTACGTTTGGATTTTCAACTTGGTTTCGTATCTGCCAAAGCTTTGT	NM_019066	RefSeq	chr15	-	23643548	23647846	MAGEL2	54551	melanoma antigen family L2	GO:0034314|GO:0005515|GO:0070534|GO:0004842|GO:0042752|GO:0042147|GO:0005634|GO:0045892|GO:0005769|GO:0030904|GO:0005768	.	NA	-	.	NA	NA	NA	NA	NA	NA	NA	NA	NA
LNCV6_141003_PI430048170	0.00393667	2.10763	6.48902	6.3078	6.03263	P	P	P	5.2515	5.37877	4.98023	P	P	P	LNCV6_141003_PI430048170	mRNA	CTGCTACTTTGAAACCAGAAAATAATGACTGGCCATTCGTTACATCTGTCTTAGTTGAAA	NM_001111283	RefSeq	chr12	-	102395866	102480600	IGF1	3479	insulin-like growth factor 1 (somatomedin C), transcript variant 1	GO:0010468|GO:0005515|GO:0033160|GO:0009408|GO:0005159|GO:0005158|GO:0046579|GO:0030879|GO:0005615|GO:0030104|GO:0046326|GO:0045445|GO:0045821|GO:0014834|GO:0045740|GO:0030168|GO:0045840|GO:0014068|GO:0014904|GO:0030166|GO:0001501|GO:0007517|GO:0005178|GO	.	NA	-	.	NA	NA	NA	NA	NA	NA	NA	NA	NA
LNCV6_136588_PI430048170	6.26016e-05	0.17065	9.37217	9.26895	9.23459	P	P	P	11.866	11.955	11.6994	P	P	P	LNCV6_136588_PI430048170	mRNA	CTGTGTTAATTCTATCTCCAGTAGGCCTAATGCTTGAATAAGCAAGATGTCTAATCAATA	NM_020474	RefSeq	chr18	+	35654568	35711834	GALNT1	2589	polypeptide N-acetylgalactosaminyltransferase 1	GO:0048471|GO:0005794|GO:0030145|GO:0016266|GO:0005576|GO:0004653|GO:0000139|GO:0006493|GO:0016020|GO:0018242|GO:0032580|GO:0030246|GO:0018243|GO:0016021|GO:0044267|GO:0043687	.	NA	-	.	NA	NA	NA	NA	NA	NA	NA	NA	NA
LNCV6_117787_PI430048170	0.000190696	4.30614	7.09227	6.88531	6.83471	P	P	P	4.80389	4.91168	4.78745	P	P	P	LNCV6_117787_PI430048170	mRNA	GCCTGTTGGGCCAGAAGACAGAAACTCCAACTGGCAAAAAAGCAAGCATCTAAGAAAAAA	NM_001145460	RefSeq	chr4	-	56647987	56681706	HOPX	84525	HOP homeobox, transcript variant 5	GO:0016575|GO:0048286|GO:0008016|GO:0043393|GO:0005634|GO:0000122|GO:0001829|GO:0003677|GO:0006351|GO:0007507|GO:0043415|GO:0051155|GO:0045596	.	NA	-	.	NA	NA	NA	NA	NA	NA	NA	NA	NA
LNCV6_130345_PI430048170	0.000175164	5.79733	6.779	6.72017	6.34387	P	P	P	3.99813	4.3302	3.91133	P	P	P	LNCV6_130345_PI430048170	mRNA	ACAGGATCTTTATTGGTGACCTTTTGTAAGACATTAGTTTGAGGTACTACCTATGTACTT	NM_000702	RefSeq	chr1	+	160115729	160143584	ATP1A2	477	ATPase, Na+/K+ transporting, alpha 2 polypeptide	GO:0008344|GO:0005886|GO:0051087|GO:0006883|GO:0045202|GO:0006942|GO:0006940|GO:0060048|GO:0046872|GO:0019229|GO:0040011|GO:0005737|GO:0002087|GO:0034220|GO:0043197|GO:0045988|GO:0006814|GO:0045822|GO:0006813|GO:0086004|GO:0005391|GO:0030007|GO:0051481|GO	.	NA	-	.	NA	NA	NA	NA	NA	NA	NA	NA	NA
LNCV6_95151_PI430048170	0.00204512	0.278094	3.54479	3.41054	3.70731	P	P	P	5.41622	5.39466	5.40609	P	P	P	LNCV6_95151_PI430048170	mRNA	AACACCCGTGGTGGCTATAAGTGCATTGATCTTTGTCCAAATGGAATGACCAAGGCAGAA	NM_031935	RefSeq	chr1	+	185734550	186190953	HMCN1	83872	hemicentin 1	GO:0031012|GO:0030054|GO:0005509|GO:0007601|GO:0005938|GO:0050896|GO:0070062|GO:0005604	.	NA	-	.	NA	NA	NA	NA	NA	NA	NA	NA	NA
LNCV6_132788_PI430048170	0.0012544	332.998	9.18188	8.93769	8.93296	P	P	P	0.133148	1.28335	0.206283	A	A	A	LNCV6_132788_PI430048170	mRNA	CAGATCACATGGCCTAGAGGCAATGTTGCATATACCTTAATCTTTGATATGAATAATATC	NM_007332	RefSeq	chr8	-	72021250	72075584	TRPA1	8989	transient receptor potential cation channel, subfamily A, member 1	GO:0042542|GO:0005262|GO:0005886|GO:0042493|GO:0009409|GO:0032421|GO:0055085|GO:0034220|GO:0005887|GO:0070588|GO:0050968|GO:0050955|GO:0048265|GO:0050966|GO:0006811|GO:0015267	.	NA	-	.	NA	NA	NA	NA	NA	NA	NA	NA	NA
LNCV6_140749_PI430048170	0.000185466	0.314053	12.08	11.8053	11.8213	P	P	P	13.6264	13.6571	13.4436	P	P	P	LNCV6_140749_PI430048170	mRNA	CACTGCCTCTATAGGGTAACCTGGAACATTCTCTAGGTTATATCAATATAAAACAATGTA	NM_001267571	RefSeq	chr9	-	98198997	98255721	TBC1D2	55357	TBC1 domain family, member 2, transcript variant 1	GO:0005515|GO:0045296|GO:0030054|GO:0032851|GO:0016023|GO:0031410|GO:0005097	.	NA	-	.	NA	NA	NA	NA	NA	NA	NA	NA	NA
LNCV6_128303_PI430048170	0.000866566	159.492	8.217	8.24219	8.13896	P	P	P	0.438089	0.837449	1.25689	A	A	A	LNCV6_128303_PI430048170	mRNA	CTGAGCTTGTTCATCCTTTGTTTTGAAAAAATTACTCAACCAATCCATTACAGCTTAACC	NM_001286650	RefSeq	chr4	-	99306386	99321442	ADH1B	125	alcohol dehydrogenase 1B (class I), beta polypeptide, transcript variant 2	GO:0006805|GO:0006069|GO:0004024|GO:0008270|GO:0044281|GO:0005829	.	NA	-	.	NA	NA	NA	NA	NA	NA	NA	NA	NA
LNCV6_143094_PI430048170	0.000375986	0.43819	7.31518	7.24349	7.16437	P	P	P	8.41234	8.55709	8.31861	P	P	P	LNCV6_143094_PI430048170	mRNA	GAAGGGCAAACATATTTCTTAATGAGAGGCAGTCCTTCATGTTTTGCAATAAAATGACTT	NM_014157	RefSeq	chr16	+	58249935	58283830	CCDC113	29070	coiled-coil domain containing 113, transcript variant 1	GO:0005515|GO:0043234|GO:0042384|GO:0005737|GO:0034451|GO:0005654	.	NA	-	.	NA	NA	NA	NA	NA	NA	NA	NA	NA
LNCV6_143866_PI430048170	0.00456298	3.28971	11.3108	11.0684	10.8544	P	P	P	9.38039	9.32208	9.41197	P	P	P	LNCV6_143866_PI430048170	mRNA	TGCTCACTGTCTGATGCAAATGTCTGGTCTATTTGTTAGTAAATAACAGGGAAATCATTT	NM_138288	RefSeq	chr14	-	34432937	34462262	SPTSSA	171546	serine palmitoyltransferase, small subunit A	GO:0005515|GO:0004758|GO:0030148|GO:0005789|GO:0016021|GO:0017059	.	NA	-	.	NA	NA	NA	NA	NA	NA	NA	NA	NA
LNCV6_135592_PI430048170	1.34955e-05	0.289768	4.2314	4.36363	4.25999	P	P	P	6.09792	6.09949	6.02068	P	P	P	LNCV6_135592_PI430048170	mRNA	CAAGTATAATAATTGCCTTTATTACAGCTCTGGCTGAGTGTTCAGCCTGAGGATATTTTT	NM_024503	RefSeq	chr1	-	41506364	41918707	HIVEP3	59269	human immunodeficiency virus type I enhancer binding protein 3, transcript variant 1	GO:0005737|GO:0005634|GO:0045893|GO:0035914|GO:0003677|GO:0046872|GO:0006351	.	NA	-	.	NA	NA	NA	NA	NA	NA	NA	NA	NA
LNCV6_129938_PI430048170	0.000776425	5.25788	4.19429	3.63575	3.61951	P	P	P	1.712	1.23226	1.35497	A	A	A	LNCV6_129938_PI430048170	mRNA	TTCTTGTCTATTTTAACCCGTCTGCTTCTAAATGATGTCTAGCTGCTTACCAACTTTAAA	NM_032803	RefSeq	chrX	-	70925579	70931125	SLC7A3	84889	solute carrier family 7 (cationic amino acid transporter, y+ system), member 3, transcript variant 1	GO:0005886|GO:0015181|GO:0006865|GO:0016021|GO:0015809|GO:0055085|GO:0015189|GO:0006811	.	NA	-	.	NA	NA	NA	NA	NA	NA	NA	NA	NA
LNCV6_137316_PI430048170	0.00229983	5.40325	5.79522	5.59719	5.53717	P	P	P	3.50986	3.2091	2.8463	P	P	P	LNCV6_137316_PI430048170	mRNA	ATTGCTGGGGTCTATTACTTCACCTACCACATCACTGTTTTCTCCAGGAATGTTCAGGTG	NM_001007537	RefSeq	chr13	-	23891098	23897006	C1QTNF9B	387911	C1q and tumor necrosis factor related protein 9B, transcript variant 1	GO:0005581|GO:0070062	.	NA	-	.	NA	NA	NA	NA	NA	NA	NA	NA	NA
LNCV6_138683_PI430048170	0.00229074	0.128979	0.0832085	0.128567	0.164343	A	A	A	3.09193	2.7834	3.31715	P	P	P	LNCV6_138683_PI430048170	mRNA	CTTCCCAAATCAGCTTCCAATTGGTTTAACCAGTATGCAACATTAAAGATTTTACTCAGA	NM_001038603	RefSeq	chr5_GL339449v2_alt	+	198534	225032	MARVELD2	153562	MARVEL domain containing 2, transcript variant 1	GO:0005515|GO:0043220|GO:0007605|GO:0031410|GO:0045216|GO:0016323|GO:0005737|GO:0016324|GO:0033010|GO:0070830|GO:0061028|GO:0005923|GO:0016021	.	NA	-	.	NA	NA	NA	NA	NA	NA	NA	NA	NA
LNCV6_143789_PI430048170	2.22306e-05	0.00928938	4.48992	4.13764	4.02993	P	P	P	10.9699	10.8535	11.1139	P	P	P	LNCV6_143789_PI430048170	mRNA	CCACCAGAGAGGATGTGTGTGAGGAGCCAGAAACGCTGAATCCAATTAAGAGAGAAAAAT	NM_178568	RefSeq	chr17	-	1934676	2025345	RTN4RL1	146760	reticulon 4 receptor-like 1	GO:0031103|GO:0009986|GO:0045121|GO:0004872|GO:0046658|GO:0009897|GO:0070062	.	NA	-	.	NA	NA	NA	NA	NA	NA	NA	NA	NA
LNCV6_138534_PI430048170	0.0074068	2.28818	6.06691	6.0918	5.67354	P	P	P	4.80661	4.80797	4.66749	P	P	P	LNCV6_138534_PI430048170	mRNA	GAACACTGACTCTTACAAGTATGTCATGAAATACTTTATGCTGTGAGCAGGTATACATGT	NM_020139	RefSeq	chr4	-	103077624	103099867	BDH2	56898	3-hydroxybutyrate dehydrogenase, type 2	GO:0005739|GO:0005737|GO:0051287|GO:0006635|GO:0030855|GO:0003858|GO:0042168|GO:0016628|GO:0055072|GO:0019290|GO:0070062	.	NA	-	.	NA	NA	NA	NA	NA	NA	NA	NA	NA
LNCV6_130667_PI430048170	1.33152e-05	5.37527	13.0683	12.9472	12.9453	P	P	P	10.5225	10.565	10.5968	P	P	P	LNCV6_130667_PI430048170	mRNA	CTTTGGGGGAATGTTTGGCAACCTTTGTGTTACAGATTAAAAATTCAGCAATTCAGTAAA	NM_003102	RefSeq	chr4	+	24795462	24800845	SOD3	6649	superoxide dismutase 3, extracellular	GO:0005515|GO:0005802|GO:0001666|GO:0005507|GO:0005796|GO:0005576|GO:0005634|GO:0005615|GO:0031012|GO:0005737|GO:0019430|GO:0008270|GO:0046688|GO:0000302|GO:0008201|GO:0070062|GO:0055114|GO:0004784	.	NA	-	.	NA	NA	NA	NA	NA	NA	NA	NA	NA
LNCV6_130003_PI430048170	0.000109259	0.262168	2.76757	2.8708	2.91781	P	P	A	4.73953	4.92499	4.67847	P	P	P	LNCV6_130003_PI430048170	mRNA	ATGGTCATCACAGAGGTGTGGGACAACGTGGCTGAGATGCACATGGCCCTGAACAACCAG	NM_001243537	RefSeq	chr22	-	20148585	20149908	LOC388849	NA	uncharacterized LOC388849	NA	.	NA	-	.	NA	NA	NA	NA	NA	NA	NA	NA	NA
LNCV6_83413_PI430048170	1.26404e-05	4.08099	13.5266	13.4838	13.354	P	P	P	11.4306	11.5202	11.3259	P	P	P	LNCV6_83413_PI430048170	mRNA	GTCTGTAATCTGTAATTGTGATGCCTCTGATGGAATAAATTATCTTTTTCAGTCTCCTCT	NM_001162371	RefSeq	chr17	-	5499426	5500999	LOC728392	728392	uncharacterized LOC728392	NA	.	NA	-	.	NA	NA	NA	NA	NA	NA	NA	NA	NA
LNCV6_129338_PI430048170	0.00579783	0.364761	8.31384	8.13729	7.74859	P	P	P	9.43525	9.50396	9.67155	P	P	P	LNCV6_129338_PI430048170	mRNA	TTTGAACTTGGCAGCTCTGGCTGCAACCCGCTGGCTCGGAAAAGATTTTATGAACTCCAC	NM_001012974	RefSeq	chr6	-	43506964	43510343	LRRC73	221424	leucine rich repeat containing 73, transcript variant 1	NA	.	NA	-	.	NA	NA	NA	NA	NA	NA	NA	NA	NA
LNCV6_142975_PI430048170	0.00261261	0.407077	9.76201	9.67858	9.48191	P	P	P	10.8028	10.7865	11.1984	P	P	P	LNCV6_142975_PI430048170	mRNA	GCGTTGTTACCTGTTGAATTTTGTATTATGTGAATCAGTGAGATGTTAGTAGAATAAGCC	NM_025225	RefSeq	chr22	+	43923738	43947568	PNPLA3	80339	patatin-like phospholipase domain containing 3	GO:0051265|GO:0051264|GO:0004806|GO:0044281|GO:0016020|GO:0004623|GO:0005789|GO:0019432|GO:0036155|GO:0016021|GO:0019433|GO:0006644|GO:0046474	.	NA	-	.	NA	NA	NA	NA	NA	NA	NA	NA	NA
LNCV6_105233_PI430048170	0.00214032	2.4499	12.3869	12.0989	12.0786	P	P	P	10.889	10.8361	10.9786	P	P	P	LNCV6_105233_PI430048170	mRNA	TGGCTTGAAAAACCCTTGCCCAGTTTTGATCCCTTCAAGACTTTGTCACAGCCTCTATCA	NM_006867	RefSeq	chr8	+	30384500	30572261	RBPMS	11030	RNA binding protein with multiple splicing, transcript variant 4	GO:0005515|GO:0006396|GO:0006355|GO:0005737|GO:0000166|GO:0008143|GO:0003713|GO:0010862|GO:0005654|GO:0060391|GO:0006351	.	NA	-	.	NA	NA	NA	NA	NA	NA	NA	NA	NA
LNCV6_129902_PI430048170	5.83225e-06	12.7656	14.2504	14.0636	13.975	P	P	P	10.3103	10.5393	10.4216	P	P	P	LNCV6_129902_PI430048170	mRNA	GTGTGTGATGTGAAGCCAATTCAGACAGGCAAATAAAAGTGACCTTTTACACTGAAAAAA	NM_130444	RefSeq	chr21	+	45455509	45513720	COL18A1	80781	collagen, type XVIII, alpha 1, transcript variant 3	GO:0005515|GO:0008284|GO:0005581|GO:0008285|GO:0005615|GO:0046872|GO:0042802|GO:0022617|GO:0030198|GO:0030574|GO:0009887|GO:0007155|GO:0070062|GO:0030335|GO:0042493|GO:0005576|GO:0001525|GO:0005604|GO:0031012|GO:0005198|GO:0001886|GO:0051599|GO:0005788|GO	.	NA	-	.	NA	NA	NA	NA	NA	NA	NA	NA	NA
LNCV6_137723_PI430048170	0.0123693	0.424393	11.6133	11.4333	11.0144	P	P	P	12.5116	12.5958	12.7192	P	P	P	LNCV6_137723_PI430048170	mRNA	AATGATACACCTCTGACCCCAGCGTTCTGAATAAAATGCTAATTTTGGATCTGGAAAAAA	NM_001792	RefSeq	chr18	-	27950962	28177446	CDH2	1000	cadherin 2, type 1, N-cadherin (neuronal)	GO:0005515|GO:0008013|GO:0005886|GO:0048514|GO:0045202|GO:0016342|GO:0005916|GO:0016339|GO:0042692|GO:0016324|GO:0005913|GO:0014704|GO:0005911|GO:0007155|GO:0090090|GO:0007156|GO:0007157|GO:0070062|GO:0097150|GO:0045295|GO:0045294|GO:0019903|GO:0034329|GO	.	NA	-	.	NA	NA	NA	NA	NA	NA	NA	NA	NA
LNCV6_100781_PI430048170	0.000150127	2.72613	5.02915	4.85558	4.81709	P	P	P	3.48996	3.37233	3.50433	P	P	P	LNCV6_100781_PI430048170	mRNA	ACAATCTCTGGTGAAACCTCAGAAAAGAGATATGCTTTTGTCTTAGATGGATGTCAGCAG	NM_001242394	RefSeq	chr6	+	158650013	158764876	SYTL3	94120	synaptotagmin-like 3, transcript variant 2	GO:0005544|GO:0017137|GO:0006887|GO:0042043|GO:0006886|GO:0019897|GO:0012505	.	NA	-	.	NA	NA	NA	NA	NA	NA	NA	NA	NA
LNCV6_130461_PI430048170	0.0183538	0.142775	0.730293	1.7007	0.127911	A	A	A	3.7813	4.00813	3.60883	P	P	P	LNCV6_130461_PI430048170	mRNA	GCAGGTTGTCTTATTATGTGATCAACAGATGTCCAGGAACTAATGAGTGGAATTTAATAT	NM_001251851	RefSeq	chr17	-	8878915	8965712	PIK3R5	23533	phosphoinositide-3-kinase, regulatory subunit 5, transcript variant 3	GO:0051897|GO:0006661|GO:0030168|GO:0005634|GO:0044281|GO:0031683|GO:0014065|GO:0005829|GO:0005737|GO:0046935|GO:0007186|GO:0016020|GO:0043551|GO:0007596|GO:0043406|GO:0006644|GO:0005944	.	NA	-	.	NA	NA	NA	NA	NA	NA	NA	NA	NA
LNCV6_103323_PI430048170	0.000317676	0.10068	3.02625	3.41593	2.98005	P	P	P	6.59025	6.38807	6.41266	P	P	P	LNCV6_103323_PI430048170	mRNA	GAGACTCTCCAAAGTCAACAAGTACATCTGTGAAAAAATCATGGATATCAATAAATCCTG	NM_001302082	RefSeq	chr1	-	48727522	48776969	BEND5	79656	BEN domain containing 5, transcript variant 2	GO:0005794	.	NA	-	.	NA	NA	NA	NA	NA	NA	NA	NA	NA
LNCV6_144526_PI430048170	0.00501988	0.387592	9.34538	9.04462	8.82702	P	P	P	10.3909	10.3845	10.5821	P	P	P	LNCV6_144526_PI430048170	mRNA	CCTTTTTAAAAAATAACCCCTCCATCCAGGATATGGAATCCAGCACCACAGTGCACAGGT	NM_014824	RefSeq	chr11	-	72836744	73142098	FCHSD2	9873	FCH and double SH3 domains 2	GO:0005515	.	NA	-	.	NA	NA	NA	NA	NA	NA	NA	NA	NA
LNCV6_68014_PI430048170	0.00313094	0.337631	2.39068	2.4172	2.56088	A	P	A	3.86294	3.89256	4.27999	P	P	P	LNCV6_68014_PI430048170	mRNA	TCCGATTTGAAATTGAAGATGTCAACAATAAAACTGAATGTGAAAAGCTTATGGAGGGGA	NM_014191	RefSeq	chr12	+	51591235	51812864	SCN8A	6334	sodium channel, voltage gated, type VIII alpha subunit, transcript variant 1	GO:0030018|GO:0086010|GO:0005886|GO:0042552|GO:0007605|GO:0005248|GO:0009636|GO:0005524|GO:0030425|GO:0019228|GO:0007399|GO:0050905|GO:0043194|GO:0033268|GO:0007517|GO:0007422|GO:0043025|GO:0007628|GO:0016023|GO:0035725|GO:0034765|GO:0001518|GO:0016021|GO	.	NA	-	.	NA	NA	NA	NA	NA	NA	NA	NA	NA
LNCV6_131305_PI430048170	0.00482426	0.376689	8.01096	7.83413	7.60837	P	P	P	9.26716	9.25635	9.18216	P	P	P	LNCV6_131305_PI430048170	mRNA	GAGGAAGAACTGAAAGGCTTTTCAACCACAAAACTCATCTGGAGTTCTCAAAGACCTGGG	NM_000214	RefSeq	chr20	-	10637683	10674046	JAG1	182	jagged 1	GO:0005515|GO:0007220|GO:0005886|GO:0045599|GO:0003184|GO:0005112|GO:0072017|GO:0003215|GO:0061073|GO:2000737|GO:0061314|GO:0045639|GO:0007219|GO:0045944|GO:0042127|GO:0045445|GO:0045446|GO:0097150|GO:0045747|GO:0030097|GO:0030334|GO:0042491|GO:0002011|GO	.	NA	-	.	NA	NA	NA	NA	NA	NA	NA	NA	NA
LNCV6_128642_PI430048170	0.000528552	2.72293	6.97122	6.71453	6.89439	P	P	P	5.60312	5.37858	5.25281	P	P	P	LNCV6_128642_PI430048170	mRNA	ACTGAACACTGTAGGGTACCTTCCAGTCTTTTTCAAGATTGTTAAATTGAGACAAGTAAT	NM_021116	RefSeq	chr7	+	45574525	45723115	ADCY1	107	adenylate cyclase 1 (brain), transcript variant 1	GO:0005516|GO:0005886|GO:0007268|GO:0005634|GO:0044281|GO:0007202|GO:0007409|GO:0007193|GO:0046872|GO:0035556|GO:0005737|GO:0007173|GO:0071377|GO:0006171|GO:0006833|GO:0034199|GO:0070062|GO:0048011|GO:0007616|GO:0042493|GO:0008294|GO:0055085|GO:0005524|GO	.	NA	-	.	NA	NA	NA	NA	NA	NA	NA	NA	NA
LNCV6_144174_PI430048170	0.0468727	2.01701	3.09655	3.73711	2.89805	P	P	P	2.53442	2.43311	1.74571	P	P	A	LNCV6_144174_PI430048170	mRNA	GTAATTCCTGCTTCTTTTATCTTTCTCTGTGTATTAAATGCTGCTCTCACGAGATTTAAG	NM_001166246	RefSeq	chr10	-	98457076	99235875	HPSE2	60495	heparanase 2 (inactive), transcript variant 4	GO:0005622|GO:0008150|GO:0005886|GO:0005975|GO:0030305|GO:0009405|GO:0005578|GO:0006027|GO:0043395|GO:0044281|GO:0030203	.	NA	-	.	NA	NA	NA	NA	NA	NA	NA	NA	NA
LNCV6_127599_PI430048170	0.00174747	10.6868	6.73477	6.75195	6.49089	P	P	P	2.80598	3.59457	3.23173	P	P	P	LNCV6_127599_PI430048170	mRNA	CATAGAAAGCAACGTGGAGACTCAGAAGCAAGCACAGCATCAAGGAATGATCAATAAAAA	NM_031895	RefSeq	chr19	+	53963035	53990215	CACNG8	59283	calcium channel, voltage-dependent, gamma subunit 8	GO:0030666|GO:0030054|GO:0005886|GO:0005245|GO:0045211|GO:0032281|GO:2000311|GO:0070588|GO:0014069|GO:0007268|GO:0006816|GO:0005891	.	NA	-	.	NA	NA	NA	NA	NA	NA	NA	NA	NA
LNCV6_55421_PI430048170	0.000869341	50.892	6.33619	6.31004	6.54406	P	P	P	1.01645	0.850882	0.206283	A	A	A	LNCV6_55421_PI430048170	mRNA	AGTCAAGAAAATGAGATGTTTTCCATCAGAGACAGTGCACACAGGCGGTTTCTGCTATTC	NM_001185156	RefSeq	chr1	+	206897442	206904139	IL24	11009	interleukin 24, transcript variant 3	GO:0008284|GO:0030336|GO:0008285|GO:0005783|GO:0042517|GO:0006915|GO:0005125|GO:0005615|GO:0046427|GO:0043280|GO:0006955|GO:0071222|GO:0006954|GO:0033136|GO:0042060|GO:0071353|GO:0043154	.	NA	-	.	NA	NA	NA	NA	NA	NA	NA	NA	NA
LNCV6_136994_PI430048170	0.000661472	3.30719	10.2612	10.3276	10.0933	P	P	P	8.51741	8.53565	8.46109	P	P	P	LNCV6_136994_PI430048170	mRNA	GGGCAGAAGGGGGAAAAACAGCAAAGAGGGATAAAATAGTTTTTGACTCTAATACTGTAT	NM_018288	RefSeq	chr6	-	169703905	169724010	PHF10	55274	PHD finger protein 10, transcript variant 1	GO:0006355|GO:0008270|GO:0071564|GO:0006351|GO:0007399	.	NA	-	.	NA	NA	NA	NA	NA	NA	NA	NA	NA
LNCV6_127854_PI430048170	0.000929427	2.34001	4.84954	4.69473	4.49353	P	P	P	3.58775	3.48036	3.29727	P	P	P	LNCV6_127854_PI430048170	mRNA	GCTCAGCTGTCCACCTTTTCAAATACCAGGCTAAAATCAATCTCATATTTTTGCTAAATT	NM_001191016	RefSeq	chr11	-	104885717	104898670	CASP12	100506742	-	GO:0072559|GO:0004197|GO:0005737|GO:0070059|GO:0072557|GO:0050727|GO:0006508|GO:0097194|GO:0042981|GO:0097169|GO:0030968	.	NA	-	.	NA	NA	NA	NA	NA	NA	NA	NA	NA
LNCV6_141672_PI430048170	0.00277337	0.4866	8.53088	8.45205	8.20108	P	P	P	9.52991	9.42784	9.35886	P	P	P	LNCV6_141672_PI430048170	mRNA	CTCATAAAAGAGAAGAGTGTTCCATTTCAGTCTCAATAAACACTTCCCTCATTCTTTCAA	NM_004170	RefSeq	chr9	+	4490426	4587469	SLC1A1	6505	solute carrier family 1 (neuronal/epithelial high affinity glutamate transporter, system Xag), member 1	GO:0015501|GO:0005886|GO:0051938|GO:0070779|GO:0005313|GO:0007268|GO:0055085|GO:0016324|GO:0016020|GO:0042883|GO:0005887|GO:0051260|GO:0016595|GO:0017153|GO:0070062|GO:0006811|GO:0033229	.	NA	-	.	NA	NA	NA	NA	NA	NA	NA	NA	NA
LNCV6_145213_PI430048170	4.20477e-06	0.0794055	7.19396	7.09607	7.05298	P	P	P	10.7288	10.8043	10.7764	P	P	P	LNCV6_145213_PI430048170	mRNA	GCATCACTGTCATACTCACAACTTCGTGAATAAAGTTGTGTGCTTTATTCGTAGAAAAAA	NM_001003408	RefSeq	chr10	-	114431109	114684655	ABLIM1	3983	actin binding LIM protein 1, transcript variant 3	GO:0005515|GO:0001725|GO:0030032|GO:0003779|GO:0015629|GO:0030027|GO:0042384|GO:0005737|GO:0007411|GO:0045944|GO:0007010|GO:0009887|GO:0008270|GO:0007601	.	NA	-	.	NA	NA	NA	NA	NA	NA	NA	NA	NA
LNCV6_132220_PI430048170	0.000890387	0.319155	9.65221	9.41632	9.32881	P	P	P	11.1747	11.2981	10.8511	P	P	P	LNCV6_132220_PI430048170	mRNA	CTACTCCACATTGCAACATTTCCATCAGACAGCATTTCAATTCCAGTATTATGTATATTG	NM_003480	RefSeq	chr12	-	8645942	8662888	MFAP5	8076	microfibrillar associated protein 5, transcript variant 1	GO:0030198|GO:0001527|GO:0005576|GO:0043206|GO:0005201	.	NA	-	.	NA	NA	NA	NA	NA	NA	NA	NA	NA
LNCV6_126935_PI430048170	0.019328	0.402114	3.07975	2.81063	3.07409	P	P	P	4.30895	4.64836	3.85972	P	P	P	LNCV6_126935_PI430048170	mRNA	CCCTTCGTGGAACAACAGCGGGGGTAATCATATCACTAATTTTGTATGAATAAATGAAAA	NM_152665	RefSeq	chr1	+	66752456	66779047	TCTEX1D1	200132	Tctex1 domain containing 1	NA	.	NA	-	.	NA	NA	NA	NA	NA	NA	NA	NA	NA
LNCV6_131750_PI430048170	9.92053e-05	40.9112	9.48357	9.35425	9.14082	P	P	P	3.72198	4.31374	3.82906	P	P	P	LNCV6_131750_PI430048170	mRNA	GTGTATCTCGTGGAATCAGTGGTTAGCATTGCCGCTATTATATTTACTCATTTTATCATT	NM_002515	RefSeq	chr14	-	26445882	26597754	NOVA1	4857	neuro-oncological ventral antigen 1, transcript variant 1	GO:0008380|GO:0006396|GO:0051252|GO:0000398|GO:0003723|GO:0005730|GO:0007268|GO:0007626|GO:0005634|GO:0003729|GO:0043231	.	NA	-	.	NA	NA	NA	NA	NA	NA	NA	NA	NA
LNCV6_127095_PI430048170	7.80879e-05	0.242499	3.62131	3.79902	3.4939	P	P	P	5.82581	5.52862	5.69272	P	P	P	LNCV6_127095_PI430048170	mRNA	CATTACAATTGGGTGAAACACATTTTACAGCTCTCAATAAATGTTTGCTGTCGCTCTTAA	NM_152435	RefSeq	chr12	+	95943292	95968592	AMDHD1	144193	amidohydrolase domain containing 1	GO:0034641|GO:0003674|GO:0050480|GO:0019557|GO:0019556|GO:0006548|GO:0044281|GO:0046872|GO:0005829	.	NA	-	.	NA	NA	NA	NA	NA	NA	NA	NA	NA
LNCV6_98985_PI430048170	0.000239768	0.408196	8.8035	8.66671	8.57082	P	P	P	9.89297	9.98984	10.0418	P	P	P	LNCV6_98985_PI430048170	mRNA	CCAGGGAGATTTCTCCATTTTCCTCTTGTCTACAGTGCGGCTACAAATCTGGGATTTTTT	NM_002356	RefSeq	chr6	+	113857334	113863475	MARCKS	4082	myristoylated alanine-rich protein kinase C substrate	GO:0005516|GO:0005813|GO:0005886|GO:0044281|GO:0015629|GO:0006112|GO:0051015|GO:0050796|GO:0005080|GO:0042585|GO:0005925|GO:0005938|GO:0070062	.	NA	-	.	NA	NA	NA	NA	NA	NA	NA	NA	NA
LNCV6_138246_PI430048170	0.00367618	0.31275	3.90258	3.49913	3.79615	P	P	P	5.40758	5.46932	5.3799	P	P	P	LNCV6_138246_PI430048170	mRNA	GAGATCCTACAATGGAAGAATAAAATCACCTCATTCTTCATTTCAGATCTGAACATTAGC	NM_054027	RefSeq	chr5	-	14704799	14871778	ANKH	56172	ANKH inorganic pyrophosphate transport regulator	GO:0030500|GO:0001501|GO:0005886|GO:0005887|GO:0019867|GO:0035435|GO:0015114|GO:0007626|GO:0005315|GO:0016021|GO:0030504|GO:0030505	.	NA	-	.	NA	NA	NA	NA	NA	NA	NA	NA	NA
LNCV6_144905_PI430048170	0.0194931	0.0496481	0.177476	1.89448	2.32949	A	A	A	6.01549	6.14377	5.98877	P	P	P	LNCV6_144905_PI430048170	mRNA	TTCCTGTCATTACCCATTGTAACAGAGCCACAAACTAATACTATGCAATGTTTTACCAAT	NM_002164	RefSeq	chr8	+	39913808	39928791	IDO1	3620	indoleamine 2,3-dioxygenase 1	GO:0006569|GO:0070233|GO:0032693|GO:0046006|GO:0070234|GO:0002534|GO:0032735|GO:0044281|GO:0046872|GO:0030485|GO:0005829|GO:0042130|GO:0034641|GO:0002678|GO:0032496|GO:0007565|GO:0004833|GO:0009055|GO:0032421|GO:0033555|GO:0002666|GO:0019441|GO:0033754|GO	.	NA	-	.	NA	NA	NA	NA	NA	NA	NA	NA	NA
LNCV6_135467_PI430048170	0.000218693	0.262448	9.08484	8.918	8.8044	P	P	P	10.816	10.8367	10.9542	P	P	P	LNCV6_135467_PI430048170	mRNA	TGACTTCTCTGATCTGTCTTGGTCGTTTGTGTTATAAAACCAAAGTTCTCTACAGACTTT	NM_001190468	RefSeq	chr5	-	37812676	37835827	GDNF	2668	glial cell derived neurotrophic factor, transcript variant 3	GO:0001656|GO:0008344|GO:0001658|GO:0001755|GO:0001759|GO:0060676|GO:0031175|GO:0042803|GO:0051584|GO:0043524|GO:0007411|GO:0045944|GO:2001240|GO:0001941|GO:0048255|GO:0090190|GO:0043066|GO:0005102|GO:0072107|GO:0005576|GO:0060688|GO:0030432|GO:0072108|GO	.	NA	-	.	NA	NA	NA	NA	NA	NA	NA	NA	NA
LNCV6_144405_PI430048170	0.000333882	2.40975	9.5381	9.47182	9.35998	P	P	P	8.26777	8.25533	8.03396	P	P	P	LNCV6_144405_PI430048170	mRNA	GAAAGGTGAATTGGCTCTAGAGGCCCTGTATGCTAGTATCATTTTCTTTTTTAATTTTTG	NM_001172743	RefSeq	chrX	-	17800048	17861337	RAI2	10742	retinoic acid induced 2, transcript variant 1	GO:0005515|GO:0003674|GO:0009790|GO:0005575	.	NA	-	.	NA	NA	NA	NA	NA	NA	NA	NA	NA
LNCV6_142926_PI430048170	0.00453694	52.631	8.43881	8.33911	8.1125	P	P	P	2.60641	3.15317	1.59389	A	P	A	LNCV6_142926_PI430048170	mRNA	CTGTACAAGTCTCTATACAATGTCTTTATCCCTGTGGGCAGCAAGCAATGATGATAATGA	NM_015567	RefSeq	chr13	+	87672614	87679615	SLITRK5	26050	SLIT and NTRK-like family, member 5	GO:0043235|GO:0048813|GO:0021756|GO:0007268|GO:0043588|GO:0030534|GO:0016021|GO:0007625|GO:0007409|GO:0072358|GO:0009410	.	NA	-	.	NA	NA	NA	NA	NA	NA	NA	NA	NA
LNCV6_140532_PI430048170	0.0168072	0.407783	13.9484	13.5485	13.3075	P	P	P	14.9645	14.9434	14.8498	P	P	P	LNCV6_140532_PI430048170	mRNA	CATGTCCTGTAAAGGTTACAAGCCTGCACAATAAAAATGTTTAACGGTTAAACAGTCAAA	NM_001172895	RefSeq	chr7	+	116525008	116561185	CAV1	857	caveolin 1, caveolae protein, 22kDa, transcript variant 2	GO:0005515|GO:0043627|GO:0019915|GO:0010524|GO:0030879|GO:0006940|GO:0030301|GO:0005113|GO:0042802|GO:0005622|GO:0016050|GO:0000165|GO:0031397|GO:0032507|GO:0005938|GO:0042632|GO:0005811|GO:0019901|GO:0000122|GO:0019217|GO:0044325|GO:0016504|GO:0043234|GO	.	NA	-	.	NA	NA	NA	NA	NA	NA	NA	NA	NA
LNCV6_137340_PI430048170	0.000118677	0.0323138	0.882965	0.552038	0.377931	A	A	A	5.69973	5.81192	5.10873	P	P	P	LNCV6_137340_PI430048170	mRNA	TACCTTCAATGGGAACTTAAACTGTTACATGTATCACATTCCAGCTACAATACTTCCATT	NM_003013	RefSeq	chr4	-	153780589	153789076	SFRP2	6423	secreted frizzled-related protein 2	GO:0017147|GO:0030308|GO:0030307|GO:0090263|GO:0050680|GO:0050732|GO:0005615|GO:0002063|GO:0030199|GO:0031668|GO:0010667|GO:0061185|GO:0048018|GO:0030336|GO:0004930|GO:0001843|GO:0048546|GO:2000035|GO:0071425|GO:0005178|GO:0060349|GO:0061056|GO:0045600|GO	.	NA	-	.	NA	NA	NA	NA	NA	NA	NA	NA	NA
LNCV6_136358_PI430048170	0.00200326	0.0029023	0.130265	1.36443	0.208844	A	A	A	9.18904	9.08801	9.06228	P	P	P	LNCV6_136358_PI430048170	mRNA	ACAGCAACAACAGTGACAATGATGACAACAGAAAAACTGACTTTTGAACTTGAGTATATC	NM_207645	RefSeq	chr11	+	109422119	109429167	C11orf87	399947	chromosome 11 open reading frame 87	GO:0016021	.	NA	-	.	NA	NA	NA	NA	NA	NA	NA	NA	NA
LNCV6_132344_PI430048170	0.00244017	0.32868	4.31575	4.26876	3.79962	P	P	P	5.93939	5.69059	5.60261	P	P	P	LNCV6_132344_PI430048170	mRNA	CATCTTTGATAAGGGAAATGGTTTCGTGACATGTACACAGTTGCTATTAAAATGTAACTC	NM_001143773	RefSeq	chr10	-	59246128	59362903	FAM13C	220965	family with sequence similarity 13, member C, transcript variant 3	NA	.	NA	-	.	NA	NA	NA	NA	NA	NA	NA	NA	NA
LNCV6_127960_PI430048170	0.00318469	0.00839154	0.183847	1.04699	1.62786	A	A	A	8.06535	7.91411	7.9118	P	P	P	LNCV6_127960_PI430048170	mRNA	CTGCCTGGTTTTTATTTGAACATTGCTGGTTATACAATCTTTGTTGGTTGTTTAACACGA	NM_033267	RefSeq	chr5	-	2746164	2751655	IRX2	153572	iroquois homeobox 2, transcript variant 1	GO:0043565|GO:0006355|GO:0072272|GO:0005634|GO:0072086	.	NA	-	.	NA	NA	NA	NA	NA	NA	NA	NA	NA
LNCV6_141129_PI430048170	0.000820964	0.296482	5.06776	4.8031	4.7689	P	P	P	6.73907	6.78743	6.35679	P	P	P	LNCV6_141129_PI430048170	mRNA	TAAAGTCATGTGGGCCACACAAGTGCAGTAGTGCAGTTCACCATGAGGGAAGAATAAAGA	NM_000475	RefSeq	chrX	-	30304421	30309378	NR0B1	190	nuclear receptor subfamily 0, group B, member 1	GO:0005515|GO:0008406|GO:0010467|GO:0006694|GO:0006367|GO:0030325|GO:0003723|GO:0021983|GO:0035258|GO:0033144|GO:0003707|GO:0050682|GO:0005634|GO:0007283|GO:0043433|GO:0042803|GO:0060008|GO:0005737|GO:0008104|GO:0042788|GO:0030238|GO:0043401|GO:0004879|GO	.	NA	-	.	NA	NA	NA	NA	NA	NA	NA	NA	NA
LNCV6_133270_PI430048170	7.535e-05	654.627	11.4369	11.1835	11.2663	P	P	P	1.5853	2.24574	1.92857	A	A	A	LNCV6_133270_PI430048170	mRNA	CCAGAGAAGCTGGAAGCCTGCCGAAAACAGGAGCAAATGGCGTTTTATAAATTATTTTTT	NM_213647	RefSeq	chr5	+	177086871	177098142	FGFR4	2264	fibroblast growth factor receptor 4, transcript variant 3	GO:0030133|GO:0005515|GO:0008286|GO:2000188|GO:0008284|GO:0005886|GO:0005783|GO:2000573|GO:0001759|GO:0010715|GO:0061144|GO:0005737|GO:0046777|GO:0007173|GO:0070857|GO:0005911|GO:0070374|GO:0008201|GO:0005007|GO:0048011|GO:0005794|GO:0017134|GO:0048015|GO	.	NA	-	.	NA	NA	NA	NA	NA	NA	NA	NA	NA
LNCV6_138868_PI430048170	0.000585431	0.0280564	2.20321	2.01659	1.67604	A	A	A	7.19837	7.1003	7.11027	P	P	P	LNCV6_138868_PI430048170	mRNA	AAAGGAAAACAAGCTCATCAATTCCACGCAGCCCAGCGGGGAGGACTCAGAGGCAAAGGC	NM_024014	RefSeq	chr7	-	27145582	27147774	HOXA6	3203	homeobox A6	GO:0043565|GO:0006355|GO:0003700|GO:0048704|GO:0005634|GO:0009952|GO:0006351	.	NA	-	.	NA	NA	NA	NA	NA	NA	NA	NA	NA
LNCV6_144617_PI430048170	0.00496564	5.41541	8.62134	9.06252	9.20687	P	P	P	6.51493	6.55769	6.56863	P	P	P	LNCV6_144617_PI430048170	mRNA	GCCTTGGAAATCCAGATCTTTAAAATTTTATGTATTTATTAACATCGCCATTGGACCCCA	NM_139155	RefSeq	chr10	+	70672802	70762439	ADAMTS14	140766	ADAM metallopeptidase with thrombospondin type 1 motif, 14, transcript variant 1	GO:0030198|GO:0030199|GO:0030574|GO:0006508|GO:0005578|GO:0008270|GO:0005576|GO:0004222	.	NA	-	.	NA	NA	NA	NA	NA	NA	NA	NA	NA
LNCV6_144001_PI430048170	0.000423729	0.131017	4.28029	4.24939	4.25063	P	P	P	7.32249	7.14764	7.09713	P	P	P	LNCV6_144001_PI430048170	mRNA	GCTCTTGGGATATTTTTAAGCATAATAAGCTCATTGGATTCAGGTATTTTTCCCTTTGCA	NM_001277313	RefSeq	chr15_KI270905v1_alt	-	4980140	5140748	FMN1	342184	formin 1, transcript variant 1	GO:0005737|GO:0005912|GO:0005886|GO:0005884|GO:0005634|GO:0003779|GO:0045010	.	NA	-	.	NA	NA	NA	NA	NA	NA	NA	NA	NA
LNCV6_115962_PI430048170	0.000765203	3.82594	8.13915	8.01578	8.10491	P	P	P	6.16255	6.30155	5.9723	P	P	P	LNCV6_115962_PI430048170	mRNA	ATAGTGCGAGCCAACGACATCCTGAAGCTGCCTTACAGCACCTTCCGCACCTACGTGTTC	NM_005994	RefSeq	chr17	+	61399895	61409466	TBX2	6909	T-box 2	GO:0005515|GO:0060045|GO:0008284|GO:0060596|GO:0005634|GO:0048596|GO:0060021|GO:0005667|GO:0007569|GO:0035909|GO:0003203|GO:0007521|GO:0000122|GO:0000978|GO:0003677|GO:0060560|GO:0006351|GO:0003151|GO:0043565|GO:0048738|GO:0001078|GO:0060465|GO:0003148|GO	.	NA	-	.	NA	NA	NA	NA	NA	NA	NA	NA	NA
LNCV6_141555_PI430048170	0.00359773	0.252973	4.73577	4.51548	4.19809	P	P	P	6.54849	6.49929	6.39616	P	P	P	LNCV6_141555_PI430048170	mRNA	TTGCCTATAAAAGGACCTTAGGATTTAAGGAAGGGGCTTCTTAATGTAGAAAGGGAAGAA	NM_017821	RefSeq	chr1	-	38885805	38941830	RHBDL2	54933	rhomboid, veinlet-like 2 (Drosophila), transcript variant 2	GO:0005886|GO:0004252|GO:0006508|GO:0016021	.	NA	-	.	NA	NA	NA	NA	NA	NA	NA	NA	NA
LNCV6_142513_PI430048170	5.01169e-06	0.449021	4.5022	4.5846	4.55857	P	P	P	5.68017	5.67694	5.75361	P	P	P	LNCV6_142513_PI430048170	mRNA	GCACTACACATGATCCTTCTGTGCTTGCTTGCATCTTTAATAAAGACATGTTCCCGGCGT	NM_014351	RefSeq	chr22	-	43824506	43862498	SULT4A1	25830	sulfotransferase family 4A, member 1	GO:0005515|GO:0008150|GO:0006805|GO:0050427|GO:0008146|GO:0044281|GO:0008202|GO:0005829	.	NA	-	.	NA	NA	NA	NA	NA	NA	NA	NA	NA
LNCV6_129778_PI430048170	0.00145174	18.4726	8.80907	8.70635	8.56189	P	P	P	4.72394	4.64523	3.99096	P	P	P	LNCV6_129778_PI430048170	mRNA	CTTGCAAGAATCAGTGCAAAGATTTGCTTTAATTGTTAAGATATGATGTCCCTATGGAAG	NM_006273	RefSeq	chr17	+	34270215	34272242	CCL7	6354	chemokine (C-C motif) ligand 7	GO:0008009|GO:0030335|GO:0008360|GO:0006874|GO:0007267|GO:0005576|GO:0005615|GO:0002548|GO:0031726|GO:0007165|GO:0071361|GO:0006955|GO:0006954|GO:0006935|GO:0031727|GO:0007010|GO:0048245|GO:0010332|GO:0008201|GO:2000503	.	NA	-	.	NA	NA	NA	NA	NA	NA	NA	NA	NA
LNCV6_145707_PI430048170	0.00979329	2.57252	4.15388	4.168	4.17072	P	P	P	2.64346	3.06303	2.65597	P	P	P	LNCV6_145707_PI430048170	mRNA	GTTGTGATGATGGAAGCAGTAAATCAAAATTATGGAAATTTGCACTGTTGAAAAGCATGC	NM_207371	RefSeq	chr10	-	21513479	21525682	SKIDA1	387640	SKI/DACH domain containing 1	GO:0005634	.	NA	-	.	NA	NA	NA	NA	NA	NA	NA	NA	NA
LNCV6_139739_PI430048170	0.000646194	16.2153	7.74868	7.5126	7.42395	P	P	P	3.09932	3.80001	3.6572	P	P	P	LNCV6_139739_PI430048170	mRNA	CAGGTGACCACTGGCATCTATGCTTAGCTATGAAAGTGAATAAAGCAGAATAAAAATAAA	NM_001038633	RefSeq	chr1	-	37611349	37634923	RSPO1	284654	R-spondin 1, transcript variant 1	GO:0005515|GO:0010468|GO:0001664|GO:0090263|GO:0005102|GO:0030177|GO:0005576|GO:0005634|GO:0005615|GO:2000254|GO:2000052|GO:0001934|GO:0002090|GO:0008201|GO:0060070|GO:0007140	.	NA	-	.	NA	NA	NA	NA	NA	NA	NA	NA	NA
LNCV6_135905_PI430048170	0.000431342	0.409822	8.96337	8.80056	8.68118	P	P	P	10.1687	10.1491	9.99589	P	P	P	LNCV6_135905_PI430048170	mRNA	ATGTGAAATTAGTAGAATCAGGGAGGACGGGACTTATGCTGTGGTAGGCAACAGAAAAAA	NM_031953	RefSeq	chr4	+	185210129	185363966	SNX25	83891	sorting nexin 25	GO:0003674|GO:0034713|GO:0032801|GO:0038032|GO:0005575|GO:0060394|GO:0035091|GO:0015031|GO:0030512|GO:0010008	.	NA	-	.	NA	NA	NA	NA	NA	NA	NA	NA	NA
LNCV6_105909_PI430048170	1.12241e-05	3.94106	7.93697	8.09064	8.01769	P	P	P	6.02846	6.09306	5.99024	P	P	P	LNCV6_105909_PI430048170	mRNA	GAGGTGCTTTCCCCATTGAGAATATTTACAGTGCAACTAAAATAGGAAAAGAAAGTTGCT	NM_004100	RefSeq	chr6	+	133241356	133532120	EYA4	2070	EYA transcriptional coactivator and phosphatase 4, transcript variant 1	GO:0005515|GO:0006355|GO:0007605|GO:0005634|GO:0007275|GO:0009653|GO:0046872|GO:0006351|GO:0035335|GO:0005737|GO:0006281|GO:0007601|GO:0004725|GO:0016568	.	NA	-	.	NA	NA	NA	NA	NA	NA	NA	NA	NA
LNCV6_80258_PI430048170	0.0204021	0.055851	2.0238	2.32322	0.174489	A	P	A	6.02391	6.02269	5.71527	P	P	P	LNCV6_80258_PI430048170	mRNA	AATGGAATCCACTGTGTTGAAGACTCTTGATATCATGTGCTTGTCTAACCATTTTTTGTT	NM_174911	RefSeq	chr8	-	126552437	126558466	FAM84B	157638	family with sequence similarity 84, member B	GO:0005515|GO:0005737|GO:0005886	.	NA	-	.	NA	NA	NA	NA	NA	NA	NA	NA	NA
LNCV6_129511_PI430048170	0.00156909	0.334948	4.59377	4.36551	4.20036	P	P	P	6.03336	6.17426	5.66691	P	P	P	LNCV6_129511_PI430048170	mRNA	GACAAGGTCAGCATCATTTGCTCTCCTGAATTTATGAGGTTTATTTATTTTTCTCTTTCC	NM_004573	RefSeq	chr15	-	40287896	40307973	PLCB2	5330	phospholipase C, beta 2, transcript variant 1	GO:0043647|GO:0005509|GO:0007268|GO:0007202|GO:0044281|GO:0005829|GO:0016042|GO:0035556|GO:0004629|GO:0050913|GO:0004435|GO:0008152|GO:0004871|GO:0006644	.	NA	-	.	NA	NA	NA	NA	NA	NA	NA	NA	NA
LNCV6_131882_PI430048170	0.00153994	0.124553	3.59939	3.35599	3.16777	P	P	P	6.41528	6.36904	6.38656	P	P	P	LNCV6_131882_PI430048170	mRNA	TGTAACTCTTGGTATCTTTACTGCATCATAGTCAATAAACTTCTTTGTACCCTTTGGCTA	NM_198275	RefSeq	chr11	-	118226689	118252368	MPZL3	196264	myelin protein zero-like 3, transcript variant 1	GO:0005515|GO:0042633|GO:0030198|GO:0016021|GO:0007155	.	NA	-	.	NA	NA	NA	NA	NA	NA	NA	NA	NA
LNCV6_144086_PI430048170	1.49915e-05	16.974	9.56295	9.50862	9.23877	P	P	P	5.39402	5.44905	5.22239	P	P	P	LNCV6_144086_PI430048170	mRNA	GGTCACTAACCTTACTTGATGCAGATAAAATCACTTGTCAATGCAAAATGTGTTAGAACT	NM_017709	RefSeq	chr1	+	117605981	117628389	FAM46C	54855	family with sequence similarity 46, member C	NA	.	NA	-	.	NA	NA	NA	NA	NA	NA	NA	NA	NA
LNCV6_127936_PI430048170	0.00107402	3.6477	6.37046	6.18445	6.36988	P	P	P	4.4468	4.44712	4.43775	P	P	P	LNCV6_127936_PI430048170	mRNA	TCAGGAAAACAATTGTATTCCCAGCCTGTGTCCCATGGGCACAAGCAAATCCCAAATTCT	NM_006905	RefSeq	chr19	-	42867205	42879719	PSG1	5669	pregnancy specific beta-1-glycoprotein 1, transcript variant 1	GO:0007565|GO:0005576	.	NA	-	.	NA	NA	NA	NA	NA	NA	NA	NA	NA
LNCV6_139556_PI430048170	0.000344906	3.31835	10.3347	10.1683	10.1085	P	P	P	8.43835	8.53175	8.45795	P	P	P	LNCV6_139556_PI430048170	mRNA	GTGGCATTGGCTTTTGAATATGAAATCTTCTCATAGCTGCCTAAAAAAGACTAGAATGTA	NM_020464	RefSeq	chr6	-	138422043	138572531	NHSL1	57224	NHS-like 1, transcript variant 1	NA	.	NA	-	.	NA	NA	NA	NA	NA	NA	NA	NA	NA
LNCV6_71645_PI430048170	0.00171442	0.187045	2.40685	2.86855	2.60221	A	P	A	5.01764	5.02172	5.12857	P	P	P	LNCV6_71645_PI430048170	mRNA	CAATAACCTGCAGATTCTCAACATCAATAAAAGTGATGAAGGTATATACAGATGTGAAGG	NM_004540	RefSeq	chr21	+	20998314	21540196	NCAM2	4685	neural cell adhesion molecule 2	GO:0030424|GO:0007608|GO:0007413|GO:0005886|GO:0016021|GO:0007158	.	NA	-	.	NA	NA	NA	NA	NA	NA	NA	NA	NA
LNCV6_131742_PI430048170	0.000689559	2.97518	5.15678	5.08112	5.24222	P	P	P	3.71012	3.40173	3.63621	P	P	P	LNCV6_131742_PI430048170	mRNA	ACATATTTTAACCCACCTAAGGTTTTACAGACTTTAGCCTCACTCAAACTTTATCACCCT	NM_152406	RefSeq	chr5	+	149271837	149341804	AFAP1L1	134265	actin filament associated protein 1-like 1, transcript variant 1	GO:0005737|GO:0030054|GO:0005886|GO:0071437|GO:0002102|GO:0005634	.	NA	-	.	NA	NA	NA	NA	NA	NA	NA	NA	NA
LNCV6_130174_PI430048170	0.000505788	2.20407	7.80164	7.82788	7.71352	P	P	P	6.75885	6.61916	6.53832	P	P	P	LNCV6_130174_PI430048170	mRNA	GAAACTTCTGTCAGGATAACATCAGCAAATTCTCAAACAGTTATGGACTCTCAGGAGCAT	NM_001001436	RefSeq	chr16	-	46802046	46831162	C16orf87	388272	chromosome 16 open reading frame 87	GO:0005515	.	NA	-	.	NA	NA	NA	NA	NA	NA	NA	NA	NA
LNCV6_127063_PI430048170	9.00548e-05	4.53189	7.26198	7.38429	7.04572	P	P	P	4.95108	5.23594	4.96663	P	P	P	LNCV6_127063_PI430048170	mRNA	CCTCAGATGTATCTAGTGGATAGTAACCATTAACAGATGACTAATTTGTTTCACTGTATC	NM_024717	RefSeq	chr5	-	94705536	95284575	MCTP1	79772	multiple C2 domains, transmembrane 1, transcript variant L	GO:0005544|GO:0019722|GO:0005509|GO:0016021	.	NA	-	.	NA	NA	NA	NA	NA	NA	NA	NA	NA
LNCV6_128824_PI430048170	9.65949e-05	0.464169	5.68961	5.76758	5.78566	P	P	P	6.78867	6.83369	6.93992	P	P	P	LNCV6_128824_PI430048170	mRNA	TTGAAAATGATTACTGGGATCAAAGTACATTCATGTCGCAATTACAGAGAGAGAGAGAAA	NM_001029874	RefSeq	chr12	+	27696494	27697633	REP15	NA	RAB15 effector protein	NA	.	NA	-	.	NA	NA	NA	NA	NA	NA	NA	NA	NA
LNCV6_139418_PI430048170	0.0282092	0.274403	2.84469	1.51873	2.20321	P	A	A	3.92257	4.22578	4.28751	P	P	P	LNCV6_139418_PI430048170	mRNA	CCAGCTTCTCAGAAAGAATTAAAGAACTTGCTGTTCAAATTAAGTAGAAAGTGAGACTCA	NM_015039	RefSeq	chr1	-	183248236	183418499	NMNAT2	23057	nicotinamide nucleotide adenylyltransferase 2, transcript variant 1	GO:0005802|GO:0005794|GO:0005770|GO:0019674|GO:0006767|GO:0045202|GO:0044281|GO:0005524|GO:0000139|GO:0000309|GO:0006766|GO:0004515|GO:0009435	.	NA	-	.	NA	NA	NA	NA	NA	NA	NA	NA	NA
LNCV6_139045_PI430048170	2.1838e-05	16.7634	15.2381	15.0848	14.9706	P	P	P	10.9695	11.024	11.1074	P	P	P	LNCV6_139045_PI430048170	mRNA	TCAGGTGCAGAAGGGAACCTTGTATTTCACAGGCCTCATTTTGATGGCAAAAAGACAGTG	NM_001198695	RefSeq	chr17	-	19383441	19387219	MFAP4	4239	microfibrillar-associated protein 4, transcript variant 1	GO:0005515|GO:0009650|GO:0010712|GO:0001527|GO:0005576|GO:0071953|GO:0071493|GO:0031012|GO:0003674|GO:0030198|GO:0043206|GO:0007155|GO:0048251|GO:0070062	.	NA	-	.	NA	NA	NA	NA	NA	NA	NA	NA	NA
LNCV6_136521_PI430048170	0.0158886	0.203762	0.489633	1.34551	1.53826	A	A	A	3.56206	3.37499	3.51484	P	P	P	LNCV6_136521_PI430048170	mRNA	CTAGATTGGATGTGTGTGTTCTAAGAAGTTGTCATAAATAAAACCTGAATGACCAATGTC	NM_001252100	RefSeq	chr1	-	200969385	201023700	KIF21B	23046	kinesin family member 21B, transcript variant 1	GO:0008017|GO:0005871|GO:0005737|GO:0008152|GO:0005874|GO:0003777|GO:0016887|GO:0005524|GO:0007018	.	NA	-	.	NA	NA	NA	NA	NA	NA	NA	NA	NA
LNCV6_135471_PI430048170	0.0104858	2.0579	11.4868	11.1914	11.0436	P	P	P	10.2882	10.1646	10.178	P	P	P	LNCV6_135471_PI430048170	mRNA	CTTTCTGTAACACTTAAAGAATTCCCTCATTCATTACCTTACAGTGTAAACAGGAGTCTA	NM_144778	RefSeq	chr13	+	97222295	97394120	MBNL2	10150	muscleblind-like splicing regulator 2, transcript variant 1	GO:0008380|GO:0006397|GO:0005737|GO:0000381|GO:0043484|GO:0005634|GO:0046872	.	NA	-	.	NA	NA	NA	NA	NA	NA	NA	NA	NA
LNCV6_135451_PI430048170	8.90621e-05	0.238855	11.5158	11.4785	11.5708	P	P	P	13.5919	13.5765	13.5955	P	P	P	LNCV6_135451_PI430048170	mRNA	TATCACTCTCCCCAACAACCTAGATGTGAAAACAGAATAAACTTCACCCAGAAAACACTT	NM_022873	RefSeq	chr1	-	27666060	27672213	IFI6	2537	interferon, alpha-inducible protein 6, transcript variant 3	GO:0005739|GO:0005515|GO:0006955|GO:0060337|GO:0005886|GO:0051902|GO:0019221|GO:2001240|GO:0001836|GO:0016021|GO:0043154	.	NA	-	.	NA	NA	NA	NA	NA	NA	NA	NA	NA
LNCV6_128843_PI430048170	0.000113482	0.392693	11.3807	11.3329	11.1649	P	P	P	12.7294	12.659	12.5379	P	P	P	LNCV6_128843_PI430048170	mRNA	GGTACATTACTGCAATGTTCTCTTAACAGTTAAACAAGCTGTTTACAGTTTAAACTGCTG	NM_018948	RefSeq	chr1	-	8011718	8026333	ERRFI1	54206	ERBB receptor feedback inhibitor 1	GO:0005515|GO:0060426|GO:0060428|GO:0019901|GO:0048286|GO:0006950|GO:0005634|GO:0005100|GO:0031234|GO:0031953|GO:0045616|GO:0005737|GO:0032321|GO:0007175|GO:0043589	.	NA	-	.	NA	NA	NA	NA	NA	NA	NA	NA	NA
LNCV6_2146_PI430048170	0.0188388	2.52847	4.35653	3.75746	3.79714	P	P	P	2.11255	3.05604	2.65699	A	P	P	LNCV6_2146_PI430048170	mRNA	TCCAATTGTTTCTTTAAACATGTATGATTATTTTATTTATAACCAGGTAGAGTATTTATA	NM_001300977	RefSeq	chr11	+	83193738	83215200	ANKRD42	338699	ankyrin repeat domain 42, transcript variant 6	GO:1900017|GO:0051092|GO:0051059|GO:0005634	.	NA	-	.	NA	NA	NA	NA	NA	NA	NA	NA	NA
LNCV6_140645_PI430048170	0.0131304	5.07273	5.03107	5.15669	4.54405	P	P	P	3.04261	1.72906	2.7052	P	A	P	LNCV6_140645_PI430048170	mRNA	TCAAGGCTTTCGAGGAGGAGCAGAACCTGCGGGGTAACCTCACCAACATGGAGACCAATG	NM_001171993	RefSeq	chr12	-	121839526	121888611	HPD	3242	4-hydroxyphenylpyruvate dioxygenase, transcript variant 2	GO:0034641|GO:0006559|GO:0003868|GO:0044281|GO:0006572|GO:0046872|GO:0070062|GO:0055114|GO:0005829	.	NA	-	.	NA	NA	NA	NA	NA	NA	NA	NA	NA
LNCV6_133055_PI430048170	0.0234808	3.38365	3.39937	2.64245	3.16327	P	P	P	1.58316	1.68702	0.480395	A	A	A	LNCV6_133055_PI430048170	mRNA	AAGATTCTACCTTTCTAAGACATCTGGAGTCAGACAGACCTGAGTTCAAGTCGTGCCTTC	NM_174943	RefSeq	chr14	+	77760829	77769742	C14orf178	283579	chromosome 14 open reading frame 178, transcript variant 1	NA	.	NA	-	.	NA	NA	NA	NA	NA	NA	NA	NA	NA
LNCV6_137601_PI430048170	0.000775444	0.472389	10.9121	11.0385	11.1747	P	P	P	12.0719	12.291	12.0044	P	P	P	LNCV6_137601_PI430048170	mRNA	TTGTCAGGATTACCCTCGGGCTAAAGAGGAAAAATAAAGATGTTGAGCTACCACTCTGGA	NM_033518	RefSeq	chrX	-	48458536	48470256	SLC38A5	92745	solute carrier family 38, member 5	GO:0015816|GO:0005886|GO:0005887|GO:0006865|GO:0015187|GO:0055085|GO:0003333|GO:0006811	.	NA	-	.	NA	NA	NA	NA	NA	NA	NA	NA	NA
LNCV6_128743_PI430048170	0.0020942	4.24628	5.23018	4.79678	4.70563	P	P	P	3.09928	2.38336	2.95291	P	P	P	LNCV6_128743_PI430048170	mRNA	AAAGTGAAACTGGCGGGACGTTCCCCTTTGAAAATTTTAAACGGCTCTTTTCAGAGCCAC	NM_005320	RefSeq	chr6	-	26234211	26234988	HIST1H1D	3007	histone cluster 1, H1d	GO:0000790|GO:0005719|GO:0006334|GO:0016584|GO:0000786|GO:0031490	.	NA	-	.	NA	NA	NA	NA	NA	NA	NA	NA	NA
LNCV6_132346_PI430048170	0.00115627	2.47904	11.7136	11.8139	11.5338	P	P	P	10.4229	10.311	10.4094	P	P	P	LNCV6_132346_PI430048170	mRNA	ATTAATTTTCTATGTGTTGTGTTTGTAGTCTTGTCTTAGCTCTGGACGTGAAATACTTCG	NM_018952	RefSeq	chr17	-	48595736	48604972	HOXB6	3216	homeobox B6	GO:0043565|GO:0006355|GO:0003700|GO:0034101|GO:0048704|GO:0005634|GO:0009952|GO:0006351	.	NA	-	.	NA	NA	NA	NA	NA	NA	NA	NA	NA
LNCV6_141051_PI430048170	0.0311741	4.14379	7.8513	8.94549	8.91878	P	P	P	6.62434	6.63677	6.54434	P	P	P	LNCV6_141051_PI430048170	mRNA	AATCTGTTTCCTACCTGTTCAGCCATGTTCCTTTATAACAGAATAACTTCTAGGTTATGC	NM_175886	RefSeq	chr7	-	18026775	18027863	PRPS1L1	221823	phosphoribosyl pyrophosphate synthetase 1-like 1	GO:0016310|GO:0000287|GO:0016301|GO:0004749|GO:0006015|GO:0005575|GO:0005524|GO:0042803|GO:0009165|GO:0009156	.	NA	-	.	NA	NA	NA	NA	NA	NA	NA	NA	NA
LNCV6_134531_PI430048170	0.00021184	0.176992	9.66711	9.35332	9.3705	P	P	P	11.8438	11.7952	12.2285	P	P	P	LNCV6_134531_PI430048170	mRNA	TGTGGGTTCTGCCGGTGGGGCTTCAGGAGTAATAAAGTGTCACCCTATCCTTGTAAAAAA	NM_014427	RefSeq	chr16	+	89575767	89597246	CPNE7	27132	copine VII, transcript variant 2	GO:0006629|GO:0005215|GO:0006810|GO:0070062	.	NA	-	.	NA	NA	NA	NA	NA	NA	NA	NA	NA
LNCV6_105802_PI430048170	0.0147089	2.25205	4.72129	4.08789	4.43558	P	P	P	3.29527	3.1269	3.3674	P	P	P	LNCV6_105802_PI430048170	mRNA	TTCCTGAAGACACATAAATCCGGGAGCAGCTCTGTGCTGAGCCTGCTTCACCGCTATGGG	NM_024637	RefSeq	chr7	-	100159241	100168750	GAL3ST4	79690	galactose-3-O-sulfotransferase 4	GO:0006790|GO:0001733|GO:0009311|GO:0050698|GO:0007267|GO:0050694|GO:0050656|GO:0030166|GO:0009100|GO:0016020|GO:0032580|GO:0016021|GO:0070062	.	NA	-	.	NA	NA	NA	NA	NA	NA	NA	NA	NA
LNCV6_102400_PI430048170	0.00888088	2.29746	6.06831	5.85994	5.9854	P	P	P	4.44963	4.96499	4.85696	P	P	P	LNCV6_102400_PI430048170	mRNA	TTCCTTCTTGTGGACCATTAAGCGAGACCCACCATCTTACTTCTTTGGCACAATCCATGT	NM_001277053	RefSeq	chr2	-	84821666	84881245	TRABD2A	129293	TraB domain containing 2A, transcript variant 1	GO:0017147|GO:0031301|GO:0005887|GO:0018158|GO:0008152|GO:0030178|GO:0006508|GO:0060322|GO:0016055|GO:0004222|GO:0046872	.	NA	-	.	NA	NA	NA	NA	NA	NA	NA	NA	NA
LNCV6_133945_PI430048170	0.000231669	0.362617	8.14058	7.96448	7.86236	P	P	P	9.54699	9.47109	9.34656	P	P	P	LNCV6_133945_PI430048170	mRNA	GGCTTTAGAGAGCAATCTTTGTATGACACCAGAAAACTCTTCATGCTATTGAATGATAAA	NM_001165032	RefSeq	chr6	+	13924866	13980009	RNF182	221687	ring finger protein 182, transcript variant 1	GO:0005515|GO:0005737|GO:0004842|GO:0016567|GO:0016874|GO:0008270|GO:0016021	.	NA	-	.	NA	NA	NA	NA	NA	NA	NA	NA	NA
LNCV6_143750_PI430048170	0.000107006	3.52428	8.13838	8.40166	8.37888	P	P	P	6.56123	6.55003	6.36155	P	P	P	LNCV6_143750_PI430048170	mRNA	TCCTGTGCTGCAGCCCCCCAAATATATTTTTCTGATATAGACCTTGTATATGGCTTTAAT	NM_181900	RefSeq	chr15	-	81312665	81324183	STARD5	80765	StAR-related lipid transfer (START) domain containing 5	GO:0032052|GO:0006869|GO:0006700|GO:0044281|GO:0008202|GO:0005829	.	NA	-	.	NA	NA	NA	NA	NA	NA	NA	NA	NA
LNCV6_128810_PI430048170	0.0011799	0.414779	9.07354	9.0517	8.76098	P	P	P	10.3094	10.2794	10.1196	P	P	P	LNCV6_128810_PI430048170	mRNA	TTATTGCTGCGTGACTCTGTATTACTTTGGTGCATAAAAGTTGAACATTGTTGTTTACTG	NM_002514	RefSeq	chr8	+	119416311	119424438	NOV	4856	nephroblastoma overexpressed	GO:0010468|GO:0030424|GO:0005578|GO:0007267|GO:0001558|GO:0030425|GO:0043231|GO:0007165|GO:0005178|GO:0060548|GO:0043025|GO:0007155|GO:0008083|GO:0008201|GO:0005520	.	NA	-	.	NA	NA	NA	NA	NA	NA	NA	NA	NA
LNCV6_131976_PI430048170	4.44553e-05	8.16289	8.02361	7.97045	7.66394	P	P	P	4.67559	5.06269	4.83147	P	P	P	LNCV6_131976_PI430048170	mRNA	CAGACCCAAGGCTGTTTTGCAGTTTTCATATGTTGTTTGCTGAAGTCATTGTAATTTTTT	NM_030797	RefSeq	chr2	-	16549461	16665866	FAM49A	81553	family with sequence similarity 49, member A	GO:0005622	.	NA	-	.	NA	NA	NA	NA	NA	NA	NA	NA	NA
LNCV6_134734_PI430048170	0.00971069	0.074812	3.64701	3.17283	2.31289	P	P	A	6.84635	6.84819	6.95568	P	P	P	LNCV6_134734_PI430048170	mRNA	GACAAACTGCTTTTGAACAGTGTCTTCAATGTATCAAGCACAAATAACTCTTTCTTCAAC	NM_004440	RefSeq	chr6	-	93240020	93419582	EPHA7	2045	EPH receptor A7, transcript variant 1	GO:0005515|GO:0031290|GO:0031594|GO:0005886|GO:0050730|GO:0030425|GO:0031952|GO:0005004|GO:0043525|GO:0007411|GO:0045211|GO:0043025|GO:0070372|GO:0022407|GO:0048013|GO:0050919|GO:0018108|GO:0005524|GO:0016310|GO:0045499|GO:0043281|GO:0046875|GO:0007420|GO	.	NA	-	.	NA	NA	NA	NA	NA	NA	NA	NA	NA
LNCV6_128734_PI430048170	8.49211e-06	10.41	7.52277	7.46085	7.34162	P	P	P	4.15976	4.1059	3.91437	P	P	P	LNCV6_128734_PI430048170	mRNA	GAGATGAAGATCCTGGCTCTGTGCTGTGCACATAGGTGTTTAATAAACATTTGTTGGCAG	NM_013389	RefSeq	chr7	-	44512535	44541315	NPC1L1	29881	NPC1-like 1, transcript variant 1	GO:0042632|GO:0005515|GO:0006695|GO:0017137|GO:0005886|GO:0042493|GO:0044281|GO:0031526|GO:0030301|GO:0030299|GO:0031489|GO:0007165|GO:0016324|GO:0008144|GO:0042157|GO:0015918|GO:0008158|GO:0016021|GO:0030659	.	NA	-	.	NA	NA	NA	NA	NA	NA	NA	NA	NA
LNCV6_143656_PI430048170	0.00296708	61.7797	6.89782	6.91	6.85185	P	P	P	1.25673	1.13961	0.206283	A	A	A	LNCV6_143656_PI430048170	mRNA	GCTCTGGGAAAGCAACAGACAGTGAATGGGCCCAATAAACAATCATTTCAAACCTACTGA	NM_207341	RefSeq	chr11	+	60867541	60875691	ZP1	22917	zona pellucida glycoprotein 1 (sperm receptor)	GO:0007338|GO:0005794|GO:0005886|GO:0005578|GO:0005576|GO:0016021|GO:0030141|GO:0007339|GO:0032504	.	NA	-	.	NA	NA	NA	NA	NA	NA	NA	NA	NA
LNCV6_143592_PI430048170	0.000317573	3.97943	5.06181	4.98525	4.70506	P	P	P	3.13782	2.69965	2.92773	P	P	P	LNCV6_143592_PI430048170	mRNA	GGGCGGGAGTGGGAAGGCTAAGAATCTGCTTAGTAAATGGTTTGAACTCTCTCCAAAAAA	NM_001130861	RefSeq	chr22	-	19523023	19525337	CLDN5	7122	claudin 5, transcript variant 1	GO:0016338|GO:0005886|GO:0005911|GO:0005198|GO:0016021|GO:0005923|GO:0070062|GO:0042802	.	NA	-	.	NA	NA	NA	NA	NA	NA	NA	NA	NA
LNCV6_132582_PI430048170	0.00418956	0.218418	2.1111	2.26123	2.19675	A	P	A	4.05298	4.39398	4.64931	P	P	P	LNCV6_132582_PI430048170	mRNA	ATTGGGCATTTTTGTGGCTGACTTTGAACGTCAGAAAAAAGTCTACAGTCAATTTTATTG	NM_000866	RefSeq	chr3	+	87982575	87993769	HTR1F	3355	5-hydroxytryptamine (serotonin) receptor 1F, G protein-coupled	GO:0004993|GO:0005886|GO:0007187|GO:0005887|GO:0007268|GO:0051378|GO:0007193|GO:0007210	.	NA	-	.	NA	NA	NA	NA	NA	NA	NA	NA	NA
LNCV6_141963_PI430048170	0.00138203	0.327577	6.41062	6.1753	6.13005	P	P	P	7.88963	7.87034	7.80076	P	P	P	LNCV6_141963_PI430048170	mRNA	TCAGTCTTTTCCGCTACCAGATCAGGTTAGCACAGTATAGAGCACTTAACTATTAAAAAA	NM_015559	RefSeq	chr18	+	44680897	45068510	SETBP1	26040	SET binding protein 1, transcript variant 1	GO:0005634|GO:0003677	.	NA	-	.	NA	NA	NA	NA	NA	NA	NA	NA	NA
LNCV6_136900_PI430048170	1.79436e-07	0.0157023	0.155164	0.311019	0.129624	A	A	A	6.28027	6.20017	6.09478	P	P	P	LNCV6_136900_PI430048170	mRNA	CTCAAATAAATGGAGCTGCTTACAAGCCTGTTGACATGTGTGGCTTGCACAACACGTTAA	NM_030949	RefSeq	chr6	+	150143051	150250392	PPP1R14C	81706	protein phosphatase 1, regulatory (inhibitor) subunit 14C	GO:0042325|GO:0005737|GO:0016020|GO:0004865|GO:0043086	.	NA	-	.	NA	NA	NA	NA	NA	NA	NA	NA	NA
LNCV6_139607_PI430048170	6.84583e-05	3.55385	16.4389	16.291	16.3698	P	P	P	14.5945	14.6084	14.4035	P	P	P	LNCV6_139607_PI430048170	mRNA	ATTCCCACGCTACCCCCTGCCTTGGGAGGTGTGTGGAATAAATTATTTTTGTTAAGGCAA	NM_002826	RefSeq	chr1	+	180154832	180198034	QSOX1	5768	quiescin Q6 sulfhydryl oxidase 1, transcript variant 1	GO:0030173|GO:0005794|GO:0006457|GO:0016971|GO:0003756|GO:0045454|GO:0005615|GO:0070062|GO:0055114|GO:0045171|GO:0043231	.	NA	-	.	NA	NA	NA	NA	NA	NA	NA	NA	NA
LNCV6_138581_PI430048170	0.0374574	6.28384	4.70025	5.08365	4.95745	P	P	P	2.83774	2.45711	0.877951	A	A	A	LNCV6_138581_PI430048170	mRNA	TGCAATACAAAAATCGTATCTCAAGGGAAAATACTCAAAGAAAGAAAAGTGGCAGCACTT	NM_001882	RefSeq	chr5	+	76952854	76969474	CRHBP	1393	corticotropin releasing hormone binding protein	GO:0005515|GO:0005783|GO:0051424|GO:2000310|GO:0031045|GO:0005634|GO:0005615|GO:0030425|GO:0005622|GO:0045055|GO:0006954|GO:0035865|GO:0071392|GO:0071356|GO:0001963|GO:0043196|GO:0071277|GO:0007611|GO:0043204|GO:0043679|GO:0051460|GO:0030141|GO:0042277|GO	.	NA	-	.	NA	NA	NA	NA	NA	NA	NA	NA	NA
LNCV6_134208_PI430048170	0.00201691	0.464595	10.2312	10.0071	10.0022	P	P	P	11.234	11.1932	11.1417	P	P	P	LNCV6_134208_PI430048170	mRNA	CCTTTTGAATGTTGTCTTCTCACTCAGCATCAGCACTTCGATCTAAATGCAGACTAGGTA	NM_015036	RefSeq	chr11	+	95089809	95132651	ENDOD1	23052	endonuclease domain containing 1	GO:0004519|GO:0090305|GO:0016020|GO:0003676|GO:0046872|GO:0070062	.	NA	-	.	NA	NA	NA	NA	NA	NA	NA	NA	NA
LNCV6_142347_PI430048170	0.00200949	6.48813	6.41835	6.54315	6.5395	P	P	P	3.4831	3.8684	4.00955	P	P	P	LNCV6_142347_PI430048170	mRNA	ACAGCTTCAGTGTATAAATGCATGAGTATTCTTTCTGTTCTGTTTTGTGCTCTCTTGTAC	NM_152284	RefSeq	chr8	+	81732452	81759513	CHMP4C	92421	charged multivesicular body protein 4C	GO:0005515|GO:0032466|GO:0006997|GO:0019058|GO:0030496|GO:0010824|GO:0015031|GO:0042803|GO:0005829|GO:0009838|GO:0050792|GO:0000920|GO:0007034|GO:0031902|GO:0016197|GO:0061024|GO:0016032|GO:0007080|GO:0070062	.	NA	-	.	NA	NA	NA	NA	NA	NA	NA	NA	NA
LNCV6_131103_PI430048170	0.0377235	0.190049	2.9479	4.76373	3.78391	P	P	P	6.48066	6.45108	6.3079	P	P	P	LNCV6_131103_PI430048170	mRNA	GGTGATTCAGCTGTTCCATTTCCATATTCTCCCTTATTAGAAATGACCACTATATTATGT	NM_173644	RefSeq	chr20	+	60055924	60072953	C20orf197	284756	chromosome 20 open reading frame 197, transcript variant 1	NA	.	NA	-	.	NA	NA	NA	NA	NA	NA	NA	NA	NA
LNCV6_72426_PI430048170	0.00329217	2.35019	7.55357	7.53234	7.58035	P	P	P	6.376	6.41814	6.16127	P	P	P	LNCV6_72426_PI430048170	mRNA	GCTATTGCCTTATTTTTTCTCATGGATGTTCTTCTTCGAGTATTTGTAGAAGGGTAAGTT	NM_001289912	RefSeq	chr22	-	38290690	38398522	LOC400927-CSNK1E	NA	LOC400927-CSNK1E readthrough	NA	.	NA	-	.	NA	NA	NA	NA	NA	NA	NA	NA	NA
LNCV6_126699_PI430048170	0.000427142	0.406799	9.27053	9.18007	9.00286	P	P	P	10.4926	10.5737	10.2767	P	P	P	LNCV6_126699_PI430048170	mRNA	GAGGGGGTAATTTTTGGATGTATCTGGACTTTTAAAAAATGTGCCTATATTTATAGCACC	NM_021021	RefSeq	chr8	-	120535744	120812069	SNTB1	6641	syntrophin, beta 1 (dystrophin-associated protein A1, 59kDa, basic component 1)	GO:0042383|GO:0005515|GO:0043234|GO:0005516|GO:0005737|GO:0006936|GO:0016010|GO:0045202|GO:0003779|GO:0030165|GO:0005856|GO:0005925	.	NA	-	.	NA	NA	NA	NA	NA	NA	NA	NA	NA
LNCV6_60077_PI430048170	2.56284e-06	28.3881	12.5783	12.4126	12.2735	P	P	P	7.71379	7.61751	7.45603	P	P	P	LNCV6_60077_PI430048170	mRNA	CCTGCTTGCAGCATATTAGAACAGACGATCCATGCTAATATTGTATTTTCTCTTAAAACA	NM_014059	RefSeq	chr13	+	41457405	41470877	RGCC	28984	regulator of cell cycle	GO:0005515|GO:0008285|GO:2000573|GO:0010718|GO:0005634|GO:2000048|GO:0050715|GO:0050710|GO:0071158|GO:0003331|GO:0006956|GO:0005737|GO:0051091|GO:0045944|GO:0001100|GO:0005813|GO:0072537|GO:0019901|GO:0071456|GO:0090272|GO:0045840|GO:0070412|GO:0030295|GO	.	NA	-	.	NA	NA	NA	NA	NA	NA	NA	NA	NA
LNCV6_100727_PI430048170	0.000409268	0.443912	8.95347	8.71432	8.79925	P	P	P	9.83586	10.0878	10.0558	P	P	P	LNCV6_100727_PI430048170	mRNA	TGCATTCTCCTGTGCCTACCACGTAACCAAAAATGAAGGAGAACTACTGTTTACAAGCCG	NM_001797	RefSeq	chr16	-	64946779	65122016	CDH11	1009	cadherin 11, type 2, OB-cadherin (osteoblast)	GO:0005886|GO:0021957|GO:0034329|GO:0005509|GO:0045216|GO:0001501|GO:0005737|GO:0001503|GO:0016021|GO:0007155|GO:0007156|GO:0034332|GO:0070062	.	NA	-	.	NA	NA	NA	NA	NA	NA	NA	NA	NA
LNCV6_41244_PI430048170	9.13019e-05	0.175293	8.13593	7.86842	7.75988	P	P	P	10.2467	10.4215	10.6328	P	P	P	LNCV6_41244_PI430048170	mRNA	TTCTAAAGTTCCTGTTGCTTCAGACAATGGATGAGCAATCACAAGGAATGCAAGGGCCAC	NM_133494	RefSeq	chr1	+	198156977	198322418	NEK7	140609	NIMA-related kinase 7	GO:0005815|GO:0005874|GO:0009966|GO:0005524|GO:0051225|GO:0046872|GO:0000910|GO:0007346|GO:0000922|GO:0005737|GO:0004674|GO:0005654|GO:0006468	.	NA	-	.	NA	NA	NA	NA	NA	NA	NA	NA	NA
LNCV6_131334_PI430048170	0.0170856	3.01681	5.27052	5.29218	5.29993	P	P	P	3.48536	3.40622	4.09089	P	P	P	LNCV6_131334_PI430048170	mRNA	ATGGGGGAGGGGTTATTGTAGAATCACATGTATTTTTAAAGTATATATGTCATGAGGCCA	NM_032184	RefSeq	chr1	-	85157672	85201045	SYDE2	84144	synapse defective 1, Rho GTPase, homolog 2 (C. elegans)	GO:0051056|GO:0007264|GO:0032862|GO:0005100|GO:0005829	.	NA	-	.	NA	NA	NA	NA	NA	NA	NA	NA	NA
LNCV6_65185_PI430048170	0.00135045	0.140771	0.273903	0.809679	0.172263	A	A	A	3.73498	2.88126	3.06391	P	P	P	LNCV6_65185_PI430048170	mRNA	CCCAGTTCTCTGGGTTGTGCTTTACTCCACGCATCAATAAATAATTTTGAAGGCCTCACA	NM_002287	RefSeq	chr19	-	54353623	54365114	LAIR1	3903	leukocyte-associated immunoglobulin-like receptor 1, transcript variant a	GO:0005515|GO:0005886|GO:0016021|GO:0070062|GO:0002376	.	NA	-	.	NA	NA	NA	NA	NA	NA	NA	NA	NA
LNCV6_137742_PI430048170	0.000395309	4.51489	8.60276	9.03314	8.9324	P	P	P	6.85827	6.78762	6.38982	P	P	P	LNCV6_137742_PI430048170	mRNA	GTCCGGACAGCCCTGCTCGAAGATATAGAAAGAGTGACCTGCACAAACTTGGAATTTTTT	NM_005946	RefSeq	chr16	+	56638665	56640088	MT1A	4489	metallothionein 1A	GO:0071294|GO:0005515|GO:0048471|GO:0005737|GO:0008270|GO:0005634|GO:0071276|GO:0045926	.	NA	-	.	NA	NA	NA	NA	NA	NA	NA	NA	NA
LNCV6_135494_PI430048170	3.30618e-06	0.160791	7.48597	7.47363	7.34981	P	P	P	10.0683	10.0244	10.129	P	P	P	LNCV6_135494_PI430048170	mRNA	GGAAATTTATTTATAGCATGAAAATAAACCTGGTGGCTGGAGTCTGCTTGTACGGTCAAA	NM_002705	RefSeq	chr16	-	4882506	4937135	PPL	5493	periplakin	GO:0030057|GO:0005739|GO:0005515|GO:0005886|GO:0031424|GO:0005200|GO:0005634|GO:0005856|GO:0070062	.	NA	-	.	NA	NA	NA	NA	NA	NA	NA	NA	NA
LNCV6_134103_PI430048170	0.00111676	0.214274	10.9924	10.8128	10.712	P	P	P	13.0837	13.0441	13.0707	P	P	P	LNCV6_134103_PI430048170	mRNA	CTGTATTTCCTGCTTCCCTGTTGAATTGGTGAATAAAACCTTGCTCTTTACATACAAAAA	NM_021077	RefSeq	chr15	-	84655128	84658571	NMB	4828	neuromedin B, transcript variant 1	GO:0031710|GO:0043005|GO:0008284|GO:0007267|GO:0005576|GO:0042593|GO:0007204|GO:0046888|GO:0007165|GO:0005179|GO:0007218|GO:0046887|GO:0050482	.	NA	-	.	NA	NA	NA	NA	NA	NA	NA	NA	NA
LNCV6_142895_PI430048170	0.000694199	0.236185	6.92728	6.90525	6.70177	P	P	P	8.95923	8.93033	8.90071	P	P	P	LNCV6_142895_PI430048170	mRNA	GACACCCAAGCAGAGCAATCAGTTAGTGAATTGAATGGAAATAAACGCTTTAGTTATAAT	NM_004442	RefSeq	chr1	+	22710837	22921500	EPHB2	2048	EPH receptor B2, transcript variant 2	GO:0005515|GO:0031290|GO:0030424|GO:0005886|GO:0071679|GO:0001655|GO:0048593|GO:0030425|GO:0005829|GO:0005005|GO:0007413|GO:0007411|GO:0043025|GO:0060021|GO:0060996|GO:0060997|GO:0007612|GO:0051965|GO:0042472|GO:0048013|GO:0005102|GO:0005576|GO:0018108|GO	.	NA	-	.	NA	NA	NA	NA	NA	NA	NA	NA	NA
LNCV6_134465_PI430048170	0.000412724	0.0177001	2.57299	2.03084	2.47376	P	A	A	8.11435	8.21724	8.25815	P	P	P	LNCV6_134465_PI430048170	mRNA	GTGCTTCTGTTTGTTATGGTAGAACAGCCCTGTGTTAATATATTGAAGTCACTTAACCAG	NM_006897	RefSeq	chr12	+	54000092	54003336	HOXC9	3225	homeobox C9	GO:0043565|GO:0006355|GO:0048704|GO:0005634|GO:0009952|GO:0006351	.	NA	-	.	NA	NA	NA	NA	NA	NA	NA	NA	NA
LNCV6_132746_PI430048170	1.69062e-05	5.01795	9.46002	9.462	9.25453	P	P	P	7.17107	7.08011	6.94482	P	P	P	LNCV6_132746_PI430048170	mRNA	CTGGCAAAACCTCTAAAACTGTCAAGAAAATGCTTGAAAGTTGATTTGTCATAGTGCAAA	NM_032270	RefSeq	chr1	+	89633084	89719535	LRRC8C	84230	leucine rich repeat containing 8 family, member C	GO:0005515|GO:0016020|GO:0005886|GO:0005789|GO:0045444|GO:0016021|GO:0006811	.	NA	-	.	NA	NA	NA	NA	NA	NA	NA	NA	NA
LNCV6_135377_PI430048170	2.76588e-05	6.18629	5.98905	6.19757	6.03188	P	P	P	3.54036	3.27466	3.51037	P	P	P	LNCV6_135377_PI430048170	mRNA	CCAGCATGTACAAAAGTACCATAGAACAGAACTGCTAAATACTGTACATAGATGTATCAT	NM_002240	RefSeq	chr21	-	37624222	37916438	KCNJ6	3763	potassium channel, inwardly rectifying subfamily J, member 6	GO:0005515|GO:0005242|GO:0005794|GO:0005886|GO:0015467|GO:0008076|GO:0010107|GO:0007268|GO:0034765|GO:0006813	.	NA	-	.	NA	NA	NA	NA	NA	NA	NA	NA	NA
LNCV6_145206_PI430048170	8.72099e-05	8.33058	15.3318	15.0652	15.168	P	P	P	12.1358	12.1923	12.0717	P	P	P	LNCV6_145206_PI430048170	mRNA	GTTCTACCCCTGGGATGTTTTGAGGGTCTTTGCAAGAATCATTAATACAAAGAATTTTTT	NM_002982	RefSeq	chr17	+	34255276	34257201	CCL2	6347	chemokine (C-C motif) ligand 2	GO:0009408|GO:0035684|GO:0008360|GO:0019221|GO:0045202|GO:0005615|GO:0030968|GO:0043524|GO:0006935|GO:0000165|GO:0044299|GO:0031727|GO:0009887|GO:0007179|GO:0031663|GO:0010332|GO:0046677|GO:0005791|GO:0008009|GO:0032869|GO:0036006|GO:0032760|GO:0002523|GO	.	NA	-	.	NA	NA	NA	NA	NA	NA	NA	NA	NA
LNCV6_143161_PI430048170	0.00420086	2.39155	6.42376	6.68202	6.62426	P	P	P	5.42381	5.48211	5.0205	P	P	P	LNCV6_143161_PI430048170	mRNA	TAATGTATTGCCAAATAGCACCATTCTTCTTCTCTCACTCTCTTGCCATGGGGGCTCTTA	NM_182767	RefSeq	chr12	-	84859487	84912829	SLC6A15	55117	solute carrier family 6 (neutral amino acid transporter), member 15, transcript variant 1	GO:0005886|GO:0005328|GO:0005326|GO:0006865|GO:0005298|GO:0055085|GO:0015804|GO:0015820|GO:0005887|GO:0035524|GO:0015824|GO:0006836|GO:0016021|GO:0006814|GO:0006811	.	NA	-	.	NA	NA	NA	NA	NA	NA	NA	NA	NA
LNCV6_143364_PI430048170	0.000390596	0.00785938	3.0326	2.38749	2.5851	P	P	A	9.6792	9.60523	9.76768	P	P	P	LNCV6_143364_PI430048170	mRNA	GGACATCAGTCTGATTAAAGGTGGTGCCAATTTATTTACATTTAAACTTGTCAGGGTATA	NM_000211	RefSeq	chr21	-	44885953	44921050	ITGB2	3689	integrin, beta 2 (complement component 3 receptor 3 and 4 subunit), transcript variant 1	GO:0005515|GO:0034142|GO:0005886|GO:0050730|GO:0008360|GO:0034687|GO:0007267|GO:0050900|GO:0035987|GO:0032403|GO:0046872|GO:0045429|GO:0051092|GO:0006954|GO:0001948|GO:0030101|GO:0030198|GO:0007159|GO:0034113|GO:0007155|GO:0050839|GO:0070062|GO:0008305|GO	.	NA	-	.	NA	NA	NA	NA	NA	NA	NA	NA	NA
LNCV6_125249_PI430048170	2.12918e-05	13.8271	11.7083	11.3603	11.3498	P	P	P	7.86803	7.53725	7.65479	P	P	P	LNCV6_125249_PI430048170	mRNA	GAGCTCACGGAAGCCCAGCGCCGGGGCCTGCAGGTGGCCCTGGAGGAATTTCACAAGCAC	NM_002889	RefSeq	chr7	-	150338317	150341674	RARRES2	5919	retinoic acid receptor responder (tazarotene induced) 2	GO:0005515|GO:0005102|GO:0005576|GO:0048566|GO:0050994|GO:0001523|GO:0001701|GO:0031012|GO:2001275|GO:0006954|GO:0050921|GO:0006935|GO:0050873|GO:0001934|GO:0010759|GO:0045600|GO:0070062	.	NA	-	.	NA	NA	NA	NA	NA	NA	NA	NA	NA
LNCV6_127867_PI430048170	0.0137707	0.075445	1.10634	2.68807	1.37083	A	P	A	5.71859	5.67395	5.47651	P	P	P	LNCV6_127867_PI430048170	mRNA	ATTACAAATGAGCCCGAATCATGACAGTCAGCAACATGATACCTGGATCCAGCCATTCCT	NM_003332	RefSeq	chr19	-	35904400	35908309	TYROBP	7305	TYRO protein tyrosine kinase binding protein, transcript variant 1	GO:0005515|GO:0005886|GO:0009986|GO:2001204|GO:0005102|GO:0042802|GO:0035556|GO:0007165|GO:0006968|GO:0002281|GO:0005887|GO:0007229|GO:0007411|GO:0045087|GO:0050776|GO:0002283|GO:0005057	.	NA	-	.	NA	NA	NA	NA	NA	NA	NA	NA	NA
LNCV6_116684_PI430048170	0.0303334	0.300302	1.96258	1.91545	0.771099	A	A	A	3.41557	3.08119	3.59572	P	P	P	LNCV6_116684_PI430048170	mRNA	TCAGGCTATTTGTATGCTGGAAAGACGAGAGAAACCTTCACCAAGCATGTTTGGTGAGCT	NM_152586	RefSeq	chr10	-	73497537	73575675	USP54	159195	ubiquitin specific peptidase 54	GO:0005515|GO:0006511	.	NA	-	.	NA	NA	NA	NA	NA	NA	NA	NA	NA
LNCV6_78697_PI430048170	6.02586e-05	2.17081	11.077	10.9695	11.0196	P	P	P	9.82357	9.9705	9.91554	P	P	P	LNCV6_78697_PI430048170	mRNA	GAAATTTGGTGAAGCTATTGGTATGGGTTTTCCTGTGAAAGTTCCCTACAGGAAAATCAC	NM_032999	RefSeq	chr7	+	74657664	74760692	GTF2I	2969	general transcription factor IIi, transcript variant 1	GO:0005515|GO:0006355|GO:0003700|GO:0006367|GO:0006366|GO:0051481|GO:0005634|GO:0042995|GO:0003677|GO:0007165|GO:0005737|GO:0014886|GO:0016020|GO:0016525|GO:0043025|GO:0005654|GO:0051019	.	NA	-	.	NA	NA	NA	NA	NA	NA	NA	NA	NA
LNCV6_140187_PI430048170	0.00323408	2.76576	6.9716	7.03551	6.65884	P	P	P	5.45877	5.47596	5.35256	P	P	P	LNCV6_140187_PI430048170	mRNA	CTGTGTCCAGAATTTTAATAGGCTCTCTATTGGAAGGAGAAAGAATTTCAAGTTAACAGT	NM_001130690	RefSeq	chr6	-	165327286	165662100	PDE10A	10846	phosphodiesterase 10A, transcript variant 1	GO:0004114|GO:0004118|GO:0047555|GO:0010738|GO:0046069|GO:0046872|GO:0005829|GO:0007165|GO:0030552|GO:0030553|GO:0007596|GO:0043949|GO:0006198	.	NA	-	.	NA	NA	NA	NA	NA	NA	NA	NA	NA
LNCV6_143248_PI430048170	0.000288933	0.0014936	2.86459	2.3222	2.23474	P	P	A	11.8368	11.8665	11.96	P	P	P	LNCV6_143248_PI430048170	mRNA	CTGTACTCACCCTGTACCACAAACACATTACATTATTAAATGTTTCTCAAAGATGGAGTT	NM_022555	RefSeq	chr6_GL000251v2_alt	-	3934020	3947089	HLA-DRB3	3125	major histocompatibility complex, class II, DR beta 3	GO:0005515|GO:0002437|GO:0050852|GO:0005886|GO:0019221|GO:0031295|GO:0042088|GO:0005765|GO:0042130|GO:0019886|GO:0006955|GO:0002381|GO:0042605|GO:2001179|GO:0071556|GO:0032689|GO:0060333|GO:0030658|GO:0012507|GO:0051262|GO:0035774|GO:0042613|GO:0032588|GO	.	NA	-	.	NA	NA	NA	NA	NA	NA	NA	NA	NA
LNCV6_128671_PI430048170	0.000538949	0.319937	4.30921	4.25795	4.01534	P	P	P	5.8407	5.76335	5.92319	P	P	P	LNCV6_128671_PI430048170	mRNA	GAAAAATGAACTCCCTGAGAATGGCTGGATGGGAATCAGATAGTCTGCTTCCATTCAGGA	NM_020754	RefSeq	chr3	+	119294372	119419476	ARHGAP31	57514	Rho GTPase activating protein 31	GO:0043547|GO:0051056|GO:0017124|GO:0007264|GO:0005925|GO:0030027|GO:0005829|GO:0005096	.	NA	-	.	NA	NA	NA	NA	NA	NA	NA	NA	NA
LNCV6_141556_PI430048170	0.00160406	5.92575	2.60388	2.61452	2.99659	P	P	P	0.22	0.121402	0.206283	A	A	A	LNCV6_141556_PI430048170	mRNA	CTCCGAGGACTTGAGTAAGTGGAAAAAACAAAACACAGACTGCAATGTTTGTTTCTAAGT	NM_138328	RefSeq	chr17	+	32266175	32324661	RHBDL3	162494	rhomboid, veinlet-like 3 (Drosophila)	GO:0004252|GO:0005509|GO:0006508|GO:0016021	.	NA	-	.	NA	NA	NA	NA	NA	NA	NA	NA	NA
LNCV6_132266_PI430048170	0.000154031	0.0748256	4.34651	4.20615	3.93969	P	P	P	7.98167	7.95007	7.80462	P	P	P	LNCV6_132266_PI430048170	mRNA	GCAAAGGCAATCAAAAACCTTTTTGTTTTGTAGCCTGCTTTTGCTTTCACAATTTGTCTT	NM_003306	RefSeq	chr13	-	37636635	37869802	TRPC4	7223	transient receptor potential cation channel, subfamily C, member 4, transcript variant epsilon	GO:0005515|GO:0045296|GO:0005886|GO:0008013|GO:0009986|GO:0048709|GO:0014051|GO:0034704|GO:0055085|GO:0070679|GO:0016323|GO:0070509|GO:0034220|GO:0005911|GO:0007411|GO:0005901|GO:0070588|GO:0006816|GO:0015279|GO:0030863	.	NA	-	.	NA	NA	NA	NA	NA	NA	NA	NA	NA
LNCV6_129050_PI430048170	0.00126348	7.46072	9.47437	9.30931	9.07277	P	P	P	6.40797	6.42039	6.35735	P	P	P	LNCV6_129050_PI430048170	mRNA	TGACTGTTTCCAGAGTGCTTATAATATACATAACTCCCTGGAAATAACTGAGCACTTTGA	NM_006186	RefSeq	chr2	-	156324431	156332775	NR4A2	4929	nuclear receptor subfamily 4, group A, member 2	GO:0005515|GO:0008344|GO:0010467|GO:0021986|GO:0006367|GO:0003707|GO:0016265|GO:0005634|GO:0009791|GO:0042053|GO:0042416|GO:0043576|GO:0043524|GO:0005737|GO:0010035|GO:0045944|GO:0031668|GO:0043401|GO:0004879|GO:0001666|GO:0046982|GO:0042551|GO:0021952|GO	.	NA	-	.	NA	NA	NA	NA	NA	NA	NA	NA	NA
LNCV6_57102_PI430048170	0.000418412	2.60617	11.8419	11.5691	11.5531	P	P	P	10.3031	10.4033	10.1159	P	P	P	LNCV6_57102_PI430048170	mRNA	ATGTATTCTGCACGAGAAGGTACACTGGTCCCAAGGTGTAAAGCTTTAAGAGTCATTTAT	NM_000076	RefSeq	chr11_KI270831v1_alt	-	115396	117975	CDKN1C	1028	cyclin-dependent kinase inhibitor 1C (p57, Kip2), transcript variant 1	GO:0005515|GO:0055123|GO:0060065|GO:0030325|GO:0071901|GO:0050680|GO:0005634|GO:0060669|GO:0005737|GO:0035264|GO:0071514|GO:0030099|GO:0007050|GO:0043010|GO:0030511|GO:0033673|GO:0001822|GO:0042551|GO:0007568|GO:0000122|GO:0042326|GO:0007346|GO:0001501|GO	.	NA	-	.	NA	NA	NA	NA	NA	NA	NA	NA	NA
LNCV6_132659_PI430048170	7.24033e-06	8.04983	6.97477	6.81145	6.78361	P	P	P	3.80177	3.75181	3.98616	P	P	P	LNCV6_132659_PI430048170	mRNA	TTACTGTGTAAGCAAGAGTAGAAGAATGTCTAATGTACAGTGGAACCTTGTACAGAATAA	NM_004205	RefSeq	chr11	-	119355214	119381726	USP2	9099	ubiquitin specific peptidase 2, transcript variant 1	GO:0005515|GO:0016579|GO:0045475|GO:0048471|GO:0004843|GO:0005634|GO:0048512|GO:0046872|GO:0042802|GO:0005737|GO:0005938|GO:0043153|GO:0031625|GO:0005813|GO:0030332|GO:0050821|GO:0000122|GO:0048642|GO:0048643|GO:0032922|GO:0004197|GO:0007049|GO:0045931|GO	.	NA	-	.	NA	NA	NA	NA	NA	NA	NA	NA	NA
LNCV6_130005_PI430048170	0.0287646	8.68189	4.9096	5.23772	4.83735	P	P	P	1.86794	2.5977	0.482886	A	P	A	LNCV6_130005_PI430048170	mRNA	CCTTGAAGAGAATAGTAATGATGGGAATTTAGAGGTTTATGACTGAATTCCCTTTGACAT	NM_004665	RefSeq	chr6	-	132743869	132758008	VNN2	8875	vanin 2, transcript variant 1	GO:0017159|GO:0015939|GO:0005886|GO:0006928|GO:0031225	.	NA	-	.	NA	NA	NA	NA	NA	NA	NA	NA	NA
LNCV6_67059_PI430048170	4.19101e-05	2.06527	9.0945	9.05202	8.9622	P	P	P	8.0449	7.99339	7.93238	P	P	P	LNCV6_67059_PI430048170	mRNA	CTGGAATTGTGGCTATCCTGATTATAGGATTTTAACTTAACTGAAATGCCTGCTTTGAAT	NM_005479	RefSeq	chr10	+	97319264	97321915	FRAT1	10023	frequently rearranged in advanced T-cell lymphomas 1	GO:0000578|GO:0090263|GO:0016055|GO:0005829	.	NA	-	.	NA	NA	NA	NA	NA	NA	NA	NA	NA
LNCV6_73608_PI430048170	0.00213886	0.0239221	2.69624	1.54437	2.05055	P	A	A	7.67242	7.6164	7.37327	P	P	P	LNCV6_73608_PI430048170	mRNA	GCAGATCCCAATCTTTCTTTTAAGCTTCTGGGTCTATTAAACTAGGTAGATCTTTTCGTA	NM_001871	RefSeq	chr3	+	148827800	148860185	CPB1	1360	carboxypeptidase B1 (tissue)	GO:0006508|GO:0004180|GO:0008270|GO:0005576|GO:0004181	.	NA	-	.	NA	NA	NA	NA	NA	NA	NA	NA	NA
LNCV6_144658_PI430048170	0.000124834	0.168462	12.1915	11.8933	12.0719	P	P	P	14.5848	14.5777	14.714	P	P	P	LNCV6_144658_PI430048170	mRNA	CCTTTCCCTAAAGACCCTAAATCTGAGGAATCAACAGGGCAGCAGATCTGTATATTTTTT	NM_001150	RefSeq	chr15	-	89784894	89814840	ANPEP	290	alanyl (membrane) aminopeptidase	GO:0005793|GO:0002003|GO:0001525|GO:0009615|GO:0005765|GO:0005615|GO:0030154|GO:0005829|GO:0001618|GO:0005887|GO:0004177|GO:0006508|GO:0016032|GO:0004872|GO:0008270|GO:0044267|GO:0009897|GO:0008237|GO:0070062	.	NA	-	.	NA	NA	NA	NA	NA	NA	NA	NA	NA
LNCV6_128358_PI430048170	0.00164328	0.459424	4.78281	5.15053	4.95922	P	P	P	6.23219	6.0023	6.03703	P	P	P	LNCV6_128358_PI430048170	mRNA	CACACCTGGAAACAGACCAATAGACATTTTGGGGTTTTATAATAGGAATTTGTATAAAGC	NM_021101	RefSeq	chr3	-	190305700	190322446	CLDN1	9076	claudin 1	GO:0005515|GO:0061436|GO:0016328|GO:0045216|GO:0042802|GO:0016324|GO:0016338|GO:0005198|GO:0005887|GO:0016032|GO:0005923|GO:0016021|GO:0007155	.	NA	-	.	NA	NA	NA	NA	NA	NA	NA	NA	NA
LNCV6_143014_PI430048170	0.000227169	0.364764	7.88195	8.01691	7.78555	P	P	P	9.4197	9.28713	9.34883	P	P	P	LNCV6_143014_PI430048170	mRNA	CCCCTAGGACCTGAACAACCAAGACTTTAAATAAATTTTAAAATGCAAAAACTCGGAGAA	NM_004877	RefSeq	chr19	-	39328356	39336086	GMFG	9535	glia maturation factor, gamma, transcript variant 1	GO:0005622|GO:2000249|GO:0034316|GO:0071933|GO:0004860|GO:0006468|GO:0003779|GO:0006469|GO:0043085|GO:0008047|GO:0008083	.	NA	-	.	NA	NA	NA	NA	NA	NA	NA	NA	NA
LNCV6_143356_PI430048170	0.00456835	2.03246	4.22014	3.9799	3.82287	P	P	P	3.08529	3.14185	2.71857	P	P	P	LNCV6_143356_PI430048170	mRNA	CATTTCCGTGTAGATGGAGATCACTGTGTGTAATAAACCACAAGTGCGTGTCTGAAAAAA	NM_173465	RefSeq	chr5	-	178237615	178590555	COL23A1	91522	collagen, type XXIII, alpha 1	GO:0005581|GO:0022617|GO:0005886|GO:0030198|GO:0030574|GO:0005788|GO:0016021	.	NA	-	.	NA	NA	NA	NA	NA	NA	NA	NA	NA
LNCV6_140589_PI430048170	0.00250365	0.232786	5.92862	6.02594	5.86944	P	P	P	8.02168	8.28753	7.78386	P	P	P	LNCV6_140589_PI430048170	mRNA	GTGTCGCCTCCAATTCTGTTAAACCTTTTAAATAAGTGCCAAGTTATTAATTGAAGACAC	NM_003030	RefSeq	chr3	-	158096010	158106163	SHOX2	6474	short stature homeobox 2, transcript variant 1	GO:0031965|GO:0060415|GO:0003170|GO:0002053|GO:0032330|GO:0000122|GO:0001649|GO:0003209|GO:0007399|GO:0043565|GO:0005739|GO:0007507|GO:0045880|GO:0001501|GO:0048743|GO:0048557|GO:0002063|GO:0060351|GO:0060272|GO:0045944|GO:2000172|GO:0005654|GO:0050772|GO	.	NA	-	.	NA	NA	NA	NA	NA	NA	NA	NA	NA
LNCV6_104670_PI430048170	0.00983376	3.23281	5.49422	5.57452	5.55754	P	P	P	3.99996	4.0166	3.46816	P	P	P	LNCV6_104670_PI430048170	mRNA	AAAGGTCAAGGAGTTCATCGTGGACATCTTGCAATTCTTGGACATTGGTCCTGATGTCAC	NM_002380	RefSeq	chr8	+	97869082	98036718	MATN2	4147	matrilin 2, transcript variant 1	GO:0031012|GO:0005515|GO:0008150|GO:0003674|GO:0031104|GO:0008347|GO:0007411|GO:0005509|GO:0005578|GO:0001764|GO:0048678|GO:0005604	.	NA	-	.	NA	NA	NA	NA	NA	NA	NA	NA	NA
LNCV6_134962_PI430048170	0.0167745	0.264569	4.20891	3.35539	3.52609	P	P	P	5.63151	5.69105	5.6693	P	P	P	LNCV6_134962_PI430048170	mRNA	TTGTGACCAAAGCAATTGTAAAACGTGGGGGAGGAAATTAAAAGCCTGCCACCTTAGTCC	NM_176072	RefSeq	chr11	+	73218297	73242427	P2RY2	5029	purinergic receptor P2Y, G-protein coupled, 2, transcript variant 1	GO:0042312|GO:0005886|GO:0045028|GO:0005887|GO:0007200|GO:0006873|GO:0004872|GO:0035589|GO:0070257	.	NA	-	.	NA	NA	NA	NA	NA	NA	NA	NA	NA
LNCV6_131642_PI430048170	0.00590055	0.423526	6.02451	5.78928	5.62903	P	P	P	7.11887	7.03747	7.03086	P	P	P	LNCV6_131642_PI430048170	mRNA	CCATAACAGCCTCTGAATTTATTGCACCAAGTGTAATGAGAACATTTTGTATACAAGAGT	NM_173554	RefSeq	chr10	+	61662960	61766333	C10orf107	219621	chromosome 10 open reading frame 107	NA	.	NA	-	.	NA	NA	NA	NA	NA	NA	NA	NA	NA
LNCV6_137599_PI430048170	0.00536048	2.06359	4.93533	5.32838	5.26873	P	P	P	4.24721	4.04435	4.12843	P	P	P	LNCV6_137599_PI430048170	mRNA	CCACCTTGCGGGGATAAAGAGAGAAAAACAAATTCATCAAATGGAAGACACATTGAAAGT	NM_001172128	RefSeq	chr15	+	81196877	81312763	IL16	3603	interleukin 16, transcript variant 3	GO:0050930|GO:0006955|GO:0006355|GO:0005737|GO:0005886|GO:0030595|GO:0016032|GO:0005634|GO:0005615|GO:0005125|GO:0006351	.	NA	-	.	NA	NA	NA	NA	NA	NA	NA	NA	NA
LNCV6_143963_PI430048170	0.0224789	2.20611	4.16625	3.827	4.02848	P	P	P	2.89805	2.41538	3.19846	P	A	P	LNCV6_143963_PI430048170	mRNA	GGCGTTTGTTTTATTCTTGGTGTTTTCAGTGCAATAAATAGCTACAAACTTCTGTGCAAA	NM_015981	RefSeq	chr5	-	150219490	150289840	CAMK2A	815	calcium/calmodulin-dependent protein kinase II alpha, transcript variant 1	GO:0005515|GO:0005516|GO:0030054|GO:0005886|GO:0051928|GO:0019221|GO:0007268|GO:0005634|GO:0042803|GO:0005829|GO:0005739|GO:0034605|GO:0000082|GO:0051092|GO:0046777|GO:0048168|GO:0018105|GO:0016301|GO:0010666|GO:0006816|GO:0004683|GO:0060333|GO:0046928|GO	.	NA	-	.	NA	NA	NA	NA	NA	NA	NA	NA	NA
LNCV6_143702_PI430048170	0.00145734	0.303824	14.7078	14.6833	14.3902	P	P	P	16.3129	16.3829	16.26	P	P	P	LNCV6_143702_PI430048170	mRNA	GACAGTTTATTTGTTGAGAGTGTGACCAAAAGTTACATGTTTGCACCTTTCTAGTTGAAA	NM_001901	RefSeq	chr6	-	131948176	131951378	CTGF	1490	connective tissue growth factor	GO:0060401|GO:0005515|GO:0005801|GO:0010467|GO:0070278|GO:0006367|GO:0045597|GO:0046330|GO:0001558|GO:0005615|GO:0035988|GO:0030154|GO:0043231|GO:0001894|GO:0060548|GO:0070374|GO:0005938|GO:0032355|GO:0044255|GO:0005520|GO:0005794|GO:0034059|GO:0051385|GO	.	NA	-	.	NA	NA	NA	NA	NA	NA	NA	NA	NA
LNCV6_140297_PI430048170	0.00276817	0.00534001	0.116801	1.40606	0.216017	A	A	A	8.30743	8.19873	8.25851	P	P	P	LNCV6_140297_PI430048170	mRNA	TGACACTGCCATTTTTCCTTTTTGGAGGAAATGGACATAGATAAAGAAGATATTTCTTCG	NM_014618	RefSeq	chr9	-	119166629	119369461	BRINP1	1620	bone morphogenetic protein/retinoic acid inducible neural-specific 1	GO:0005515|GO:0008219|GO:0005737|GO:0071300|GO:0045930|GO:0045666|GO:0007050|GO:0045786	.	NA	-	.	NA	NA	NA	NA	NA	NA	NA	NA	NA
LNCV6_127812_PI430048170	5.23607e-05	0.139231	5.93797	6.05238	5.72563	P	P	P	8.80681	8.82428	8.6291	P	P	P	LNCV6_127812_PI430048170	mRNA	CACCATATCCATTTCAAGCTATCATTAAAGTGTAATTTCCTTTGCTCTCTTTTACTGGGA	NM_001160133	RefSeq	chr6	+	72621842	73198850	KCNQ5	56479	potassium channel, voltage gated KQT-like subfamily Q, member 5, transcript variant 4	GO:0005251|GO:0005242|GO:0006461|GO:0005886|GO:0008076|GO:0007268|GO:0034765|GO:0016021|GO:0071805	.	NA	-	.	NA	NA	NA	NA	NA	NA	NA	NA	NA
LNCV6_140461_PI430048170	0.0171835	2.20418	12.0866	12.5903	12.4781	P	P	P	11.2504	11.2409	11.2895	P	P	P	LNCV6_140461_PI430048170	mRNA	GGATATGTGGTGTATATCCTTCCAAAAAATTAAAACGAAAATAAAGTAGCTGCGATTGGG	NM_001964	RefSeq	chr5	+	138465491	138469315	EGR1	1958	early growth response 1	GO:0005515|GO:0003700|GO:0006366|GO:0048709|GO:0019221|GO:0060291|GO:0042220|GO:0072303|GO:0003690|GO:0043525|GO:0060337|GO:0048169|GO:0051602|GO:0007611|GO:0031667|GO:0035035|GO:0032869|GO:0000976|GO:0030509|GO:0000122|GO:0000979|GO:0071317|GO:0071383|GO	.	NA	-	.	NA	NA	NA	NA	NA	NA	NA	NA	NA
LNCV6_128686_PI430048170	0.0031941	0.41317	8.25168	8.08031	7.76284	P	P	P	9.28378	9.17962	9.48231	P	P	P	LNCV6_128686_PI430048170	mRNA	GTATTACTCTCCAAATCTACTGTACTGTCAGCTTCACTCCACCTGAGAAAAAAGAAAAAA	NM_001001484	RefSeq	chr10	+	16436942	16513745	PTER	9317	phosphotriesterase related, transcript variant 1	GO:0003674|GO:0030855|GO:0016788|GO:0009056|GO:0008270|GO:0070062	.	NA	-	.	NA	NA	NA	NA	NA	NA	NA	NA	NA
LNCV6_132212_PI430048170	4.16338e-05	6.92862	7.21087	7.43655	7.07791	P	P	P	4.4738	4.59716	4.28237	P	P	P	LNCV6_132212_PI430048170	mRNA	AACCTGTGTTTGTATTGGAGATGTGTCTACTATTGGGGGAAGAGGTTCTCGTAATCGCTC	NM_025224	RefSeq	chr20	-	63743667	63805503	ZBTB46	140685	zinc finger and BTB domain containing 46	GO:0006355|GO:2001200|GO:0045656|GO:0030853|GO:0005634|GO:0003676|GO:0045650|GO:2001199|GO:0046872|GO:0006351	.	NA	-	.	NA	NA	NA	NA	NA	NA	NA	NA	NA
LNCV6_93174_PI430048170	0.00533585	9.67367	4.00399	3.85585	4.00112	P	P	P	0.434349	0.287152	1.16284	A	A	A	LNCV6_93174_PI430048170	mRNA	AAAGATCAAGGACCGGTATCTTCTAAAGGCACTGGACAAATACTGGCATGAAGACTGCCT	NM_018640	RefSeq	chr12	-	16548371	16606602	LMO3	55885	LIM domain only 3 (rhombotin-like 2), transcript variant 1	GO:0006355|GO:0005737|GO:0035360|GO:0045600|GO:0070373|GO:0008270|GO:2000324|GO:0006351	.	NA	-	.	NA	NA	NA	NA	NA	NA	NA	NA	NA
LNCV6_130542_PI430048170	0.00144053	0.237637	8.22126	8.06537	7.9182	P	P	P	10.1598	10.1202	10.1598	P	P	P	LNCV6_130542_PI430048170	mRNA	GATACCGTGTTTTCTTTGTATTGTGTTCTACCTTCCCTTTCACTGAAAATGATCACTTCA	NM_004538	RefSeq	chrX	-	93670925	93673683	NAP1L3	4675	nucleosome assembly protein 1-like 3	GO:0006334|GO:0005634	.	NA	-	.	NA	NA	NA	NA	NA	NA	NA	NA	NA
LNCV6_133330_PI430048170	0.00213119	0.486795	5.45604	5.49686	5.15063	P	P	P	6.53898	6.46207	6.22417	P	P	P	LNCV6_133330_PI430048170	mRNA	GGATCTTGTAAACAGGGCATATATCAAAGATGACCTTATAATATGTACCCGAATATACAG	NM_006255	RefSeq	chr14	+	61321442	61550980	PRKCH	5583	protein kinase C, eta	GO:0004699|GO:2000810|GO:0005886|GO:0010744|GO:0030168|GO:0060252|GO:0050861|GO:0005524|GO:0070528|GO:0046872|GO:0005829|GO:0007165|GO:0005737|GO:0051092|GO:0045618|GO:0005911|GO:0007596|GO:0034351|GO:0006468|GO:0004697|GO:0019899|GO:0017160|GO:0070062	.	NA	-	.	NA	NA	NA	NA	NA	NA	NA	NA	NA
LNCV6_143718_PI430048170	0.000414026	0.0626372	0.102735	0.120251	0.121671	A	A	A	4.14591	4.22868	3.94624	P	P	P	LNCV6_143718_PI430048170	mRNA	CTTACCTTCTATTATCCTATATTAGCTTCAATACATCCAAACCAAATGGCTGTTAGGTAG	NM_003667	RefSeq	chr12	+	71439769	71586308	LGR5	8549	leucine-rich repeat containing G protein-coupled receptor 5, transcript variant 1	GO:0005515|GO:0048839|GO:0007186|GO:0005886|GO:0005887|GO:0004930|GO:0090263|GO:0032588|GO:0004888	.	NA	-	.	NA	NA	NA	NA	NA	NA	NA	NA	NA
LNCV6_138526_PI430048170	0.000225919	0.248235	8.69835	8.4233	8.4455	P	P	P	10.4784	10.4994	10.6316	P	P	P	LNCV6_138526_PI430048170	mRNA	AATGGTATCTGGGCGGAGCTCACAGAGTTCTTGGAATAAAAGCAACCTCAGAACACTTTG	NM_139314	RefSeq	chr19	+	8364126	8374375	ANGPTL4	51129	angiopoietin-like 4, transcript variant 1	GO:0004857|GO:0005515|GO:0001666|GO:0043066|GO:0005578|GO:0070328|GO:0072562|GO:0005576|GO:0001525|GO:0044281|GO:0005615|GO:0030154|GO:0045766|GO:0051005|GO:0051260|GO:2000352|GO:0044255	.	NA	-	.	NA	NA	NA	NA	NA	NA	NA	NA	NA
LNCV6_128023_PI430048170	0.0336755	0.447246	1.3704	2.34606	1.80125	A	P	A	2.82118	3.02419	3.28374	P	P	P	LNCV6_128023_PI430048170	mRNA	CACTTTCTTAGCTTGCCATCCTTTGTAGGATGAGTTTGGCCTTTGAATAAATGATTAAAG	NM_032131	RefSeq	chr6	+	108848415	108974472	ARMC2	84071	armadillo repeat containing 2, transcript variant 1	NA	.	NA	-	.	NA	NA	NA	NA	NA	NA	NA	NA	NA
LNCV6_131681_PI430048170	0.00044719	14.1184	10.3621	10.4185	10.4743	P	P	P	6.74473	6.66709	6.35853	P	P	P	LNCV6_131681_PI430048170	mRNA	AGAAAGAAGCAGTTCTCACAATGTTGCTAGTTTTTTGCTTCTCTTTCCCCCACCCTACTC	NM_003155	RefSeq	chr8	-	23841920	23854807	STC1	6781	stanniocalcin 1	GO:0030336|GO:0007566|GO:0006874|GO:0071456|GO:0005634|GO:0033280|GO:0090280|GO:0035988|GO:0005615|GO:0071385|GO:0060348|GO:0046697|GO:0010596|GO:0044070|GO:0005737|GO:0016324|GO:0001503|GO:0005179|GO:0001886|GO:0003421|GO:0051926|GO:0071320|GO:0086004	.	NA	-	.	NA	NA	NA	NA	NA	NA	NA	NA	NA
LNCV6_136121_PI430048170	0.00163018	0.155693	2.455	3.23746	2.66761	A	P	A	5.28295	5.46637	5.74032	P	P	P	LNCV6_136121_PI430048170	mRNA	CGAAGCCCCAAGCTGGGCACAAAGTAGTTTTTTACGTGGTGGGTGTCTTTTTGTAAAAAA	NM_014012	RefSeq	chr20	+	31475287	31484905	REM1	28954	RAS (RAD and GEM)-like GTP-binding 1	GO:0006184|GO:0005516|GO:0016020|GO:0007264|GO:0005525	.	NA	-	.	NA	NA	NA	NA	NA	NA	NA	NA	NA
LNCV6_139683_PI430048170	0.00024942	0.449648	7.12699	6.90595	6.97758	P	P	P	8.2271	8.17766	8.06956	P	P	P	LNCV6_139683_PI430048170	mRNA	TTGTTTCTGGCCCGTTGGCATCGCTGCCTTCTGTCTAGCCCAGAAGACCAACAAGGCTTG	NM_001098821	RefSeq	chr19	+	41376532	41384082	TMEM91	NA	transmembrane protein 91, transcript variant 1	NA	.	NA	-	.	NA	NA	NA	NA	NA	NA	NA	NA	NA
LNCV6_139366_PI430048170	0.00124523	4.40218	7.40587	7.36296	7.34684	P	P	P	5.33947	5.29528	5.05044	P	P	P	LNCV6_139366_PI430048170	mRNA	GGAATTTATAAACGGACTTGGATTAAACATGTCTGCCTTTCTAAGGTTGCAAATGTTACA	NM_002285	RefSeq	chr2	-	99547253	100142575	AFF3	3899	AF4/FMR2 family, member 3, transcript variant 1	GO:0006355|GO:0005737|GO:0003690|GO:0035116|GO:0034612|GO:0005654|GO:0005634|GO:0006351	.	NA	-	.	NA	NA	NA	NA	NA	NA	NA	NA	NA
LNCV6_51942_PI430048170	0.00760713	0.449001	4.78482	4.35468	4.28946	P	P	P	5.50952	5.66278	5.76283	P	P	P	LNCV6_51942_PI430048170	mRNA	AGTCCTATGAGCTCATCCGGAAGATTGAGGCCTACATGGAAGACGACAGGATCTGCTCGC	NM_014216	RefSeq	chr14_KI270847v1_alt	-	54284	230480	ITPK1	3705	inositol-tetrakisphosphate 1-kinase, transcript variant 1	GO:0052835|GO:0052825|GO:0000287|GO:0043647|GO:0052725|GO:0044281|GO:0003824|GO:0005524|GO:0052831|GO:0052830|GO:0052726|GO:0005829|GO:0007165|GO:0016310|GO:0007596|GO:0032957|GO:0016311|GO:0016853|GO:0047325	.	NA	-	.	NA	NA	NA	NA	NA	NA	NA	NA	NA
LNCV6_145076_PI430048170	0.000356276	2.20696	6.9683	6.76521	6.94366	P	P	P	5.72605	5.82873	5.70142	P	P	P	LNCV6_145076_PI430048170	mRNA	GACATTAGAGTCAAATCAGCCTTGACCTGAGTTTGTTGATTTAACATTGATTTCAAGCAT	NM_001277120	RefSeq	chr19	-	52838531	52857649	ZNF468	90333	zinc finger protein 468, transcript variant 1	GO:0006355|GO:0005634|GO:0003677|GO:0046872|GO:0006351	.	NA	-	.	NA	NA	NA	NA	NA	NA	NA	NA	NA
LNCV6_136078_PI430048170	1.0537e-05	0.0178198	1.95516	1.58134	1.43966	A	A	A	7.71806	7.45648	7.24369	P	P	P	LNCV6_136078_PI430048170	mRNA	TTTCTCCTGAATTTTTAATGCAGAAGTTTGAATGAAGCAAGGGAAGGCATGTAGGGACAG	NM_014391	RefSeq	chr10	-	90912099	90921275	ANKRD1	27063	ankyrin repeat domain 1 (cardiac muscle)	GO:0005515|GO:0042826|GO:0050714|GO:0071560|GO:0005634|GO:0044281|GO:0035914|GO:0030017|GO:0005829|GO:0002039|GO:0005737|GO:0045944|GO:0071356|GO:0001085|GO:0055008|GO:0044255|GO:0005667|GO:0001105|GO:0043065|GO:0003714|GO:0045214|GO:0005730|GO:0071456|GO	.	NA	-	.	NA	NA	NA	NA	NA	NA	NA	NA	NA
LNCV6_127831_PI430048170	0.00314088	15.2027	7.65944	7.80806	7.52631	P	P	P	4.2237	3.59655	3.23047	P	P	P	LNCV6_127831_PI430048170	mRNA	GTGTGTTGCAGATTTATTTGGCCATTTAGAATAACCAAATCAATCTGGCTAACTAGGAAT	NM_002736	RefSeq	chr7	+	107044732	107161811	PRKAR2B	5577	protein kinase, cAMP-dependent, regulatory, type II, beta	GO:0034236|GO:0005886|GO:0008603|GO:0044281|GO:0007202|GO:0005829|GO:0035556|GO:0005737|GO:0030552|GO:0043197|GO:0007173|GO:0071377|GO:0043198|GO:0000086|GO:0006631|GO:0006833|GO:0007612|GO:0034199|GO:0031625|GO:0070062|GO:2000480|GO:0048011|GO:0005952|GO	.	NA	-	.	NA	NA	NA	NA	NA	NA	NA	NA	NA
LNCV6_142959_PI430048170	6.02779e-05	2.37424	10.6615	10.6707	10.5152	P	P	P	9.29458	9.34832	9.46221	P	P	P	LNCV6_142959_PI430048170	mRNA	GCATCGATGTCTGTACTGTAAATTTCTAATTTATCACTGTACAAAGAAAACCCCTTGCTA	NM_012193	RefSeq	chr11	-	86945674	86955398	FZD4	8322	frizzled class receptor 4	GO:0005515|GO:0017147|GO:0030947|GO:0005886|GO:0071300|GO:0007605|GO:0010812|GO:0042701|GO:0061299|GO:0007223|GO:0042803|GO:0051091|GO:0005911|GO:0030182|GO:0034446|GO:0043507|GO:0016055|GO:0060070|GO:0031625|GO:0070062|GO:0042813|GO:0046982|GO:0009986|GO	.	NA	-	.	NA	NA	NA	NA	NA	NA	NA	NA	NA
LNCV6_142765_PI430048170	0.00540205	2.02522	8.32587	8.28702	8.29509	P	P	P	7.36385	7.35844	7.1184	P	P	P	LNCV6_142765_PI430048170	mRNA	TTTGCCTGTATGGTACTGTTTTGTTTGTTAATAAAGTGCACTGCCACCCCCAATGCAGAC	NM_001270458	RefSeq	chrX	+	43654906	43746824	MAOA	4128	monoamine oxidase A, transcript variant 2	GO:0006805|GO:0007268|GO:0005741|GO:0044281|GO:0007269|GO:0005739|GO:0008131|GO:0042420|GO:0016021|GO:0042136|GO:0042135|GO:0006576|GO:0055114	.	NA	-	.	NA	NA	NA	NA	NA	NA	NA	NA	NA
LNCV6_138210_PI430048170	0.00212787	2.31428	8.59598	8.49141	8.24127	P	P	P	7.34398	7.1831	7.18659	P	P	P	LNCV6_138210_PI430048170	mRNA	CTTCTCTCTCTAATAATACTTCCTCTGATGTAATTAACGGTTGGTAGACAATATCAGACA	NM_024790	RefSeq	chr8	+	67064367	67196614	CSPP1	79848	centrosome and spindle pole associated protein 1, transcript variant 1	GO:0005813|GO:0005737|GO:0000922|GO:0032467|GO:0005874|GO:0005819|GO:0051781|GO:0005654	.	NA	-	.	NA	NA	NA	NA	NA	NA	NA	NA	NA
LNCV6_129496_PI430048170	0.00757424	3.51281	8.21169	8.11387	8.18046	P	P	P	6.5773	6.43293	5.99891	P	P	P	LNCV6_129496_PI430048170	mRNA	GCTTTCTCTGCATGGTTTGCAGGAAAAATTTAGATAGCACAACAGTGGCAATTCACGATG	NM_001321	RefSeq	chr12	-	76858714	76879040	CSRP2	1466	cysteine and glycine-rich protein 2, transcript variant 1	GO:0003674|GO:0008270|GO:0007275|GO:0005634|GO:0005925|GO:0030154	.	NA	-	.	NA	NA	NA	NA	NA	NA	NA	NA	NA
LNCV6_126679_PI430048170	0.0017072	0.451534	4.07094	4.38649	4.26622	P	P	P	5.17064	5.55684	5.42848	P	P	P	LNCV6_126679_PI430048170	mRNA	ATTATGTGGCATTTGAGTAGTTTGCTTGTGCCTCACATGTCAACATTAAACTTTGTGGAG	NM_001256404	RefSeq	chr1	-	114584574	114670111	DENND2C	163259	DENN/MADD domain containing 2C, transcript variant 1	GO:0017112|GO:0032851	.	NA	-	.	NA	NA	NA	NA	NA	NA	NA	NA	NA
LNCV6_133399_PI430048170	0.00195092	0.412883	9.06257	9.06579	8.87174	P	P	P	10.2809	10.2973	10.2587	P	P	P	LNCV6_133399_PI430048170	mRNA	GTGTGGAAGAAAACAGCAGTTCTTTTATAATTGCTTGAAATTAGGAAAGCGCTTATTTCC	NM_004748	RefSeq	chr15	-	55355222	55408376	CCPG1	9236	cell cycle progression 1, transcript variant 1	GO:0003674|GO:0008284|GO:0007049|GO:0016021|GO:0045787	.	NA	-	.	NA	NA	NA	NA	NA	NA	NA	NA	NA
LNCV6_137310_PI430048170	0.00203735	0.0852009	0.119547	0.158662	0.191956	A	A	A	3.74863	3.95189	3.37056	P	P	P	LNCV6_137310_PI430048170	mRNA	AATCCTCAACATCGACTTTAGCAATGCAGACATTGACGTGTTGGAGGACCTTTTGGTGCT	NM_182519	RefSeq	chr20	+	33081511	33111751	BPIFB4	149954	BPI fold containing family B, member 4	GO:0005737|GO:0005576|GO:0008289	.	NA	-	.	NA	NA	NA	NA	NA	NA	NA	NA	NA
LNCV6_137632_PI430048170	0.00136562	0.434709	9.77865	9.61311	9.47752	P	P	P	10.7485	10.8881	10.8505	P	P	P	LNCV6_137632_PI430048170	mRNA	TTCTAGTTTTCCTGTTCCCACCCTGGTCTTTGCCTGATGACAGAGAAACTTTCTAAAAAA	NM_015983	RefSeq	chr7	+	43926435	43956136	UBE2D4	51619	ubiquitin-conjugating enzyme E2D 4 (putative)	GO:0035519|GO:0005515|GO:0085020|GO:0070534|GO:0004842|GO:0016567|GO:0070979|GO:0016874|GO:0070936|GO:0044314|GO:0005524	.	NA	-	.	NA	NA	NA	NA	NA	NA	NA	NA	NA
LNCV6_133846_PI430048170	2.15733e-05	4.8234	7.55579	7.47724	7.31855	P	P	P	5.32112	5.11432	5.10552	P	P	P	LNCV6_133846_PI430048170	mRNA	CTAGTTGTTTCTATGGACACCTGCTCTGAATTGTACATTGACTTCATTACTAAAGAACAA	NM_001251962	RefSeq	chr3_KI270777v1_alt	-	24215	164217	ARHGEF26	26084	Rho guanine nucleotide exchange factor (GEF) 26, transcript variant 1	GO:0032321|GO:0001886|GO:0097178|GO:0005089|GO:0001726	.	NA	-	.	NA	NA	NA	NA	NA	NA	NA	NA	NA
LNCV6_123638_PI430048170	0.000195501	0.0439731	2.47565	2.26024	2.06051	A	P	A	6.75551	6.86419	6.72454	P	P	P	LNCV6_123638_PI430048170	mRNA	GATGCACAGGAGGAGAAGCAGGAGCTGTCGGGAAGATCAGAAGCCAGTCATGGATGACCA	NM_001025159	RefSeq	chr5	-	150401636	150412936	CD74	972	CD74 molecule, major histocompatibility complex, class II invariant chain, transcript variant 1	GO:0005515|GO:0016064|GO:0043030|GO:0050731|GO:0005765|GO:0006886|GO:0042802|GO:0005622|GO:0001516|GO:0002906|GO:0070374|GO:0070062|GO:0004896|GO:0009986|GO:0006952|GO:0019955|GO:0090023|GO:0051085|GO:0002830|GO:0035718|GO:0009897|GO:0050998|GO:0042289|GO	.	NA	-	.	NA	NA	NA	NA	NA	NA	NA	NA	NA
LNCV6_136540_PI430048170	0.00016611	3.19139	7.54186	7.73834	7.53363	P	P	P	6.10287	5.83552	5.84613	P	P	P	LNCV6_136540_PI430048170	mRNA	TCAGAGAATTTATGGCTCTGTATCCAATAAAAAAGATGGTGAAACTGGTCTATCTGCCAA	NM_001080410	RefSeq	chr2	-	73254681	73269630	FBXO41	150726	F-box protein 41	NA	.	NA	-	.	NA	NA	NA	NA	NA	NA	NA	NA	NA
LNCV6_142040_PI430048170	8.2345e-05	0.00745669	4.89752	5.14164	4.84361	P	P	P	11.9808	11.693	12.3524	P	P	P	LNCV6_142040_PI430048170	mRNA	GCTTTCTCCTCGTTCTTATTTAATCTCCATTTCTACTGTGTGATCAGGATGTAATAAAGA	NM_001523	RefSeq	chr19	-	51713111	51723992	HAS1	3036	hyaluronan synthase 1, transcript variant 1	GO:0005886|GO:0005975|GO:0044281|GO:0006024|GO:0045226|GO:0085029|GO:0036120|GO:0010764|GO:0005887|GO:0009405|GO:0030213|GO:0030212|GO:0050501|GO:0007155|GO:0030203	.	NA	-	.	NA	NA	NA	NA	NA	NA	NA	NA	NA
LNCV6_134628_PI430048170	2.76811e-05	13.9659	12.338	12.2403	12.1678	P	P	P	8.51124	8.54619	8.26648	P	P	P	LNCV6_134628_PI430048170	mRNA	TGATCTCCGTGTGTGCATGTGACTGTGCTGGGTTGGAATGTGAACAATAAAGAGGAATGT	NM_001126181	RefSeq	chr11	+	124739932	124747206	NRGN	4900	neurogranin (protein kinase C substrate, RC3), transcript variant 2	GO:0035556|GO:0005622|GO:0007165|GO:0005516|GO:0007399	.	NA	-	.	NA	NA	NA	NA	NA	NA	NA	NA	NA
LNCV6_144150_PI430048170	0.00355575	5.39367	5.6843	5.84684	5.7118	P	P	P	2.99076	3.25948	3.63182	P	P	P	LNCV6_144150_PI430048170	mRNA	TTCGTGGGGAGAGGGCGTGAATTGTTTTGAGTACAAACCTTAAATCCAAAGGCTCTTCTC	NM_003532	RefSeq	chr6	+	26225154	26225616	HIST1H3E	8353	histone cluster 1, H3e	GO:0005515|GO:0010467|GO:0046982|GO:0006325|GO:0006335|GO:0005576|GO:0005634|GO:0000228|GO:0003677|GO:0032776|GO:0043234|GO:0060968|GO:0016020|GO:0000183|GO:0007596|GO:0045814|GO:0040029|GO:0005654|GO:0000786|GO:0070062	.	NA	-	.	NA	NA	NA	NA	NA	NA	NA	NA	NA
LNCV6_134526_PI430048170	0.0013834	2.121	5.92244	6.01687	5.87012	P	P	P	4.68339	4.95068	4.91083	P	P	P	LNCV6_134526_PI430048170	mRNA	TGTGTATTCCTTCTCAATGCTTTCCTTGGTGTTAACCTTAATAAAAAGGCGTCATCTCCC	NM_001013635	RefSeq	chr12	+	48183582	48185926	CCDC184	387856	coiled-coil domain containing 184	GO:0005737	.	NA	-	.	NA	NA	NA	NA	NA	NA	NA	NA	NA
LNCV6_139559_PI430048170	0.0087768	2.30412	4.92629	4.91525	4.56137	P	P	P	3.25434	3.90836	3.58278	P	P	P	LNCV6_139559_PI430048170	mRNA	TACTGATCACAATTCTAATCCCCATCAAGCAATGTACAGATAACTCTTCCAAGAAATGTT	NM_001142645	RefSeq	chr2	-	190506892	190534742	TMEM194B	NA	transmembrane protein 194B	NA	.	NA	-	.	NA	NA	NA	NA	NA	NA	NA	NA	NA
LNCV6_136222_PI430048170	0.0208156	0.221928	0.11187	0.166318	1.20244	A	A	A	2.7056	2.67479	2.8849	P	P	P	LNCV6_136222_PI430048170	mRNA	GCAGCAACAGCAAATCACGACCACTGATAGATGTCTATTCTTGTTGGAGACATGGGATGA	NM_000698	RefSeq	chr10_GL383546v1_alt	+	215006	286950	ALOX5	240	arachidonate 5-lipoxygenase, transcript variant 1	GO:0005515|GO:0019369|GO:0019370|GO:0031965|GO:0005506|GO:0019372|GO:0044281|GO:0005635|GO:0005615|GO:0006691|GO:0016363|GO:0005829|GO:0004051|GO:0002540|GO:0005641|GO:2001300|GO:0055114	.	NA	-	.	NA	NA	NA	NA	NA	NA	NA	NA	NA
LNCV6_136763_PI430048170	4.76652e-05	31.5266	8.39045	8.02686	7.7933	P	P	P	3.25042	2.86157	3.19666	P	P	P	LNCV6_136763_PI430048170	mRNA	CTGTATGCCTTGCTTCTACCATGAGCAGAGACAATTAAAATCTTTATTCCAGTGAAAAAA	NM_000906	RefSeq	chr1	+	153678687	153693992	NPR1	4881	natriuretic peptide receptor 1	GO:0030308|GO:0042562|GO:0008528|GO:0035556|GO:0042312|GO:0016941|GO:0050880|GO:0042417|GO:0007589|GO:0019901|GO:0048662|GO:0004383|GO:0005525|GO:0005524|GO:0043235|GO:0004672|GO:0007186|GO:0005887|GO:0006182|GO:0016525|GO:0035815|GO:0043114|GO:0008217|GO	.	NA	-	.	NA	NA	NA	NA	NA	NA	NA	NA	NA
LNCV6_144010_PI430048170	3.6007e-07	0.0335661	0.261724	0.39533	0.421786	A	A	A	5.33326	5.22069	5.21745	P	P	P	LNCV6_144010_PI430048170	mRNA	TGACCAAGATGAGACAAAAGGCTTCCTTTCGCGATACTAGAGCCTCTGTAAACTTCTCCT	NM_000226	RefSeq	chr17	-	41565840	41572058	KRT9	3857	keratin 9, type I	GO:0005882|GO:0045109|GO:0016020|GO:0008544|GO:0005200|GO:0043588|GO:0005634|GO:0007283|GO:0005615|GO:0070062	.	NA	-	.	NA	NA	NA	NA	NA	NA	NA	NA	NA
LNCV6_144691_PI430048170	0.0015567	0.285013	8.89842	9.23677	9.50259	P	P	P	11.0689	11.2414	10.7871	P	P	P	LNCV6_144691_PI430048170	mRNA	ATTTCTTATCCCGTTTGTTACATTTTGAGGATAATAAAGGTGTGTGATCTGGTTTGGTAC	NM_030567	RefSeq	chr5	+	177446794	177456286	PRR7	80758	proline rich 7 (synaptic), transcript variant 1	GO:0030054|GO:0045211|GO:0016021	.	NA	-	.	NA	NA	NA	NA	NA	NA	NA	NA	NA
LNCV6_141574_PI430048170	0.000663078	0.040996	5.07236	5.35108	5.55891	P	P	P	9.99025	9.95467	9.90207	P	P	P	LNCV6_141574_PI430048170	mRNA	CCCTTCTCTGCAGCTCTGACCCAAATTTAGTCCCAGAAATAAACTGAGAAGTGGAAAAAA	NM_012427	RefSeq	chr19	-	50943302	50953088	KLK5	25818	kallikrein-related peptidase 5, transcript variant 1	GO:0005515|GO:0045745|GO:0097209|GO:0008544|GO:0004252|GO:0006508|GO:0008236|GO:0008233|GO:0005615	.	NA	-	.	NA	NA	NA	NA	NA	NA	NA	NA	NA
LNCV6_142169_PI430048170	0.00991223	2.06374	6.32596	6.76686	6.32036	P	P	P	5.55965	5.33212	5.42341	P	P	P	LNCV6_142169_PI430048170	mRNA	CATGCACACCCATTAAAAATAGTACATTTTACAGTGTCCCAGTCATACTTTTAATTGGCA	NM_001278346	RefSeq	chr5	-	178208473	178232822	PHYKPL	85007	5-phosphohydroxy-L-lysine phospho-lyase, transcript variant 3	GO:0005739|GO:0030170|GO:0008152|GO:0008483|GO:0016829	.	NA	-	.	NA	NA	NA	NA	NA	NA	NA	NA	NA
LNCV6_129385_PI430048170	0.0173985	0.288172	4.64534	4.48057	3.8297	P	P	P	6.14051	6.19334	6.12782	P	P	P	LNCV6_129385_PI430048170	mRNA	GCAACAGAAGTGCCCGGTCATATGGTGTAAAAATGTAAATACAGGAAAATTTCATTTTTC	NM_001134407	RefSeq	chr16	-	9753404	10182406	GRIN2A	2903	glutamate receptor, ionotropic, N-methyl D-aspartate 2A, transcript variant 1	GO:0005515|GO:0030054|GO:0005886|GO:0005783|GO:0045471|GO:0005234|GO:0017146|GO:0007268|GO:0030425|GO:0001964|GO:0042417|GO:0034220|GO:0008104|GO:0048167|GO:0004972|GO:0045211|GO:0007611|GO:0006810|GO:0007613|GO:0022008|GO:0005262|GO:0043065|GO:0009986|GO	.	NA	-	.	NA	NA	NA	NA	NA	NA	NA	NA	NA
LNCV6_133240_PI430048170	0.00601458	0.263282	3.17208	3.63512	3.92026	P	P	P	5.59435	5.63246	5.35788	P	P	P	LNCV6_133240_PI430048170	mRNA	GCTTGGTAAATTAAGCAGCTTTTGTATCTTCCCCTTTGACTTTAGGTAATAAAGCATCCA	NM_001017920	RefSeq	chr2	+	158795316	158815984	DAPL1	92196	death associated protein-like 1	GO:0006915|GO:0030154	.	NA	-	.	NA	NA	NA	NA	NA	NA	NA	NA	NA
LNCV6_94583_PI430048170	0.000205475	11.4643	10.1907	9.94796	9.94593	P	P	P	6.47283	6.5556	6.51174	P	P	P	LNCV6_94583_PI430048170	mRNA	CAGCAAATATGGTCTTGCTGCATTCAGGGCTTTTTTAAAGTCGGAATTCTGTGAAGAAAA	NM_002923	RefSeq	chr1	+	192809038	192812277	RGS2	5997	regulator of G-protein signaling 2	GO:0005515|GO:0005516|GO:0043005|GO:0005886|GO:0038032|GO:0007283|GO:0060087|GO:0005829|GO:0005739|GO:0010614|GO:0005737|GO:0060452|GO:0043407|GO:0043951|GO:0031116|GO:0045744|GO:0005730|GO:0048487|GO:0006417|GO:0010519|GO:0043547|GO:0007049|GO:0008277|GO	.	NA	-	.	NA	NA	NA	NA	NA	NA	NA	NA	NA
LNCV6_141233_PI430048170	0.00317453	0.133199	0.146365	0.188712	0.258241	A	A	A	3.34964	3.17046	2.73288	P	P	P	LNCV6_141233_PI430048170	mRNA	AGGCCTTGTTGCTGGAAGAAACTAGTGAAGAGAGGTTAAATTCTGGCAATATAATGTTTT	NM_024993	RefSeq	chr2	-	77516660	77522376	LRRTM4	80059	leucine rich repeat transmembrane neuronal 4, transcript variant 2	GO:0030054|GO:0097113|GO:0045211|GO:0032281|GO:0043395	.	NA	-	.	NA	NA	NA	NA	NA	NA	NA	NA	NA
LNCV6_102915_PI430048170	0.0117005	0.497756	2.22662	2.36275	2.03955	A	A	A	3.20529	3.48767	2.91742	P	P	P	LNCV6_102915_PI430048170	mRNA	GCATTGCCATGAATTTCTACCAGATGTGCTTTTATTTAGCTTTACATATTCCTTTGACCA	NM_001287140	RefSeq	chr8	-	80034869	80080831	TPD52	7163	tumor protein D52, transcript variant 4	GO:0005515|GO:0048471|GO:0008284|GO:0005737|GO:0046982|GO:0005783|GO:0030183|GO:0005509|GO:0009653|GO:0046903|GO:0042803	.	NA	-	.	NA	NA	NA	NA	NA	NA	NA	NA	NA
LNCV6_71309_PI430048170	0.00121404	2.68493	8.60211	8.53041	8.32573	P	P	P	7.06046	7.12191	7.01322	P	P	P	LNCV6_71309_PI430048170	mRNA	CAATGACCAGCAGTTGGTATGAAGAACCTTTGACATTTTGTAAAAGGCCATTTCTTGGGA	NM_001161841	RefSeq	chr20	-	47657405	47786616	SULF2	55959	sulfatase 2, transcript variant 3	GO:0005795|GO:0005886|GO:0009986|GO:0051216|GO:0001822|GO:0005783|GO:0005509|GO:0048706|GO:0035860|GO:0030177|GO:0008449|GO:0032836|GO:0005615|GO:0010575|GO:0060384|GO:0060348|GO:0002063|GO:0003094|GO:0040037|GO:0004065|GO:0030201|GO:0014846	.	NA	-	.	NA	NA	NA	NA	NA	NA	NA	NA	NA
LNCV6_138345_PI430048170	0.000346064	5.7952	12.3263	12.1671	12.1315	P	P	P	9.68075	9.69447	9.65235	P	P	P	LNCV6_138345_PI430048170	mRNA	CGTATTTTAGGTGACTGAAATTGCAACAGTGATCATAATGAGGTTTGTTAAAACGATAGC	NM_005845	RefSeq	chr13	-	95019828	95301446	ABCC4	10257	ATP-binding cassette, sub-family C (CFTR/MRP), member 4, transcript variant 1	GO:0014070|GO:0031088|GO:0005886|GO:0042493|GO:0042626|GO:0010243|GO:0030168|GO:0055085|GO:0048661|GO:0005524|GO:0008150|GO:0016323|GO:0016020|GO:0007596|GO:0002576|GO:0016021|GO:0055114|GO:0016404	.	NA	-	.	NA	NA	NA	NA	NA	NA	NA	NA	NA
LNCV6_139170_PI430048170	0.000119172	5.04392	3.89273	3.52673	3.61928	P	P	P	1.12371	1.48584	1.42564	A	A	A	LNCV6_139170_PI430048170	mRNA	CAGAGACTCAGATGAGCTGTAAAATCCATTAAGGAAAAATAAATGGCATGATTTGGAAGT	NM_178450	RefSeq	chr5	-	126867713	127030808	MARCH3	NA	membrane-associated ring finger (C3HC4) 3, E3 ubiquitin protein ligase	NA	.	NA	-	.	NA	NA	NA	NA	NA	NA	NA	NA	NA
LNCV6_140928_PI430048170	0.000983525	0.185982	3.32831	3.21434	2.96056	P	P	P	5.2261	5.68199	5.83283	P	P	P	LNCV6_140928_PI430048170	mRNA	TTTGAGCATCATCTCGGCTTACATTTTCTCTGTGGAAAACATCAGCCATTACATTACTTG	NM_153244	RefSeq	chr10	-	15095384	15097319	C10orf111	221060	chromosome 10 open reading frame 111	GO:0016021	.	NA	-	.	NA	NA	NA	NA	NA	NA	NA	NA	NA
LNCV6_130945_PI430048170	0.0429802	0.25912	0.7202	1.89564	0.189207	A	A	A	2.84656	3.34274	2.95964	P	P	P	LNCV6_130945_PI430048170	mRNA	TATCTAAACCAGCCTTGGGAAATTACAGTGTTTTACAATAAACAGAAAGCCAAGCGGAAA	NM_001282540	RefSeq	chr17	-	15565481	15619704	CDRT1	374286	CMT1A duplicated region transcript 1, transcript variant 2	GO:0008150|GO:0003674|GO:0005575	.	NA	-	.	NA	NA	NA	NA	NA	NA	NA	NA	NA
LNCV6_101678_PI430048170	5.64426e-06	4.66738	8.01112	7.93561	8.10546	P	P	P	5.88389	5.71527	5.78523	P	P	P	LNCV6_101678_PI430048170	mRNA	ATCTGCTGATGTCCAATACCTGCTTCATGTGTTCTCAGAGCCCTCATCACTTCCCATGCC	NM_005449	RefSeq	chr1	-	206903285	206922033	FCMR	NA	Fas apoptotic inhibitory molecule 3, transcript variant 1	NA	.	NA	-	.	NA	NA	NA	NA	NA	NA	NA	NA	NA
LNCV6_127425_PI430048170	4.46136e-05	5.18299	11.5093	11.3396	11.2552	P	P	P	8.98886	8.91778	9.08305	P	P	P	LNCV6_127425_PI430048170	mRNA	CCACCGTTGTGCATATTGTTGCTTCTGAACCACAAACTGTATAAATGGATGGTTTTTTGC	NM_181711	RefSeq	chr12	+	52006944	52015889	GRASP	160622	GRP1 (general receptor for phosphoinositides 1)-associated scaffold protein, transcript variant 1	GO:0007165|GO:0048471|GO:0030054|GO:0008104|GO:0030306|GO:0045211|GO:0030165|GO:0042802	.	NA	-	.	NA	NA	NA	NA	NA	NA	NA	NA	NA
LNCV6_134319_PI430048170	0.00626143	0.057703	1.63142	2.77558	2.39462	A	P	A	6.45631	6.48847	6.42441	P	P	P	LNCV6_134319_PI430048170	mRNA	CCTGTGTCTTGATGGATTGTGGTTTATTTTGTTGCAAGAGTGAGTTTGAACTATTCTAAT	NM_001080507	RefSeq	chr6	-	73368556	73369792	OOEP	441161	oocyte expressed protein	GO:0009880|GO:0009566|GO:0043234|GO:0007566|GO:0003723|GO:0045177|GO:0035088|GO:0006468|GO:0005938|GO:0001701|GO:0043623	.	NA	-	.	NA	NA	NA	NA	NA	NA	NA	NA	NA
LNCV6_79586_PI430048170	0.00242404	2.31623	5.83117	5.50322	5.39904	P	P	P	4.58793	4.18217	4.33457	P	P	P	LNCV6_79586_PI430048170	mRNA	TGGATTTATCCTGCAGCTCAAGCAGCTTCTTGCCTGTGGTAATACCAAGTTTGAGGCATT	NM_001001924	RefSeq	chr8	-	17643793	17800917	MTUS1	57509	microtubule associated tumor suppressor 1, transcript variant 1	GO:0005739|GO:0005794|GO:0005886|GO:0005815|GO:0071375|GO:0005874|GO:0005819|GO:0005634|GO:0010758|GO:0005615	.	NA	-	.	NA	NA	NA	NA	NA	NA	NA	NA	NA
LNCV6_110323_PI430048170	0.0138476	0.353055	4.05507	3.67213	4.44152	P	P	P	5.70697	5.59512	5.46459	P	P	P	LNCV6_110323_PI430048170	mRNA	AGCAACAGGGGCCCCTTCTTCGGCTACTACTTCTTCAACGGGCTTCTGATGTTGCTGCAG	NM_024552	RefSeq	chr19	+	8209332	8262420	CERS4	79603	ceramide synthase 4	GO:0006665|GO:0031965|GO:0005783|GO:0030148|GO:0005789|GO:0050291|GO:0044281|GO:0016021|GO:0046513|GO:0003677	.	NA	-	.	NA	NA	NA	NA	NA	NA	NA	NA	NA
LNCV6_129404_PI430048170	0.000358947	0.385715	10.3376	10.1425	10.0323	P	P	P	11.5629	11.661	11.418	P	P	P	LNCV6_129404_PI430048170	mRNA	GATTCTGCCTGAGTTACTTCCCTTTTGAGAAATCATATCTCAAATACATAACCTGGTAAT	NM_153214	RefSeq	chr2	+	112138384	112188214	FBLN7	129804	fibulin 7, transcript variant 1	GO:0005509|GO:0005578|GO:0007155|GO:0008201|GO:0005925|GO:0070062	.	NA	-	.	NA	NA	NA	NA	NA	NA	NA	NA	NA
LNCV6_132810_PI430048170	0.000310634	8.81825	8.88196	8.93517	8.99047	P	P	P	5.62763	5.78546	5.95634	P	P	P	LNCV6_132810_PI430048170	mRNA	GGTTTTGTGCTTTGTCGTTTTTCTTTTTTAAACAAAACATGACAACCTTGGCTTTTCCGA	NM_003728	RefSeq	chr4	-	95162504	95549210	UNC5C	8633	unc-5 homolog C (C. elegans)	GO:0030334|GO:0005042|GO:0043065|GO:0038007|GO:0005886|GO:0007420|GO:0007411|GO:0006915|GO:0016021|GO:0033564	.	NA	-	.	NA	NA	NA	NA	NA	NA	NA	NA	NA
LNCV6_127357_PI430048170	8.10179e-05	2.26379	7.97271	7.85962	7.88104	P	P	P	6.75179	6.73539	6.69183	P	P	P	LNCV6_127357_PI430048170	mRNA	GCTGGTTACTCAGGGTTCATCTGTCCATGGCCTTTCTAATAAACTGTTGAGTTGAAGCAC	NM_002953	RefSeq	chr1	+	26529757	26575029	RPS6KA1	6195	ribosomal protein S6 kinase, 90kDa, polypeptide 1, transcript variant 1	GO:0005515|GO:2000491|GO:0034142|GO:0030307|GO:0045597|GO:0007268|GO:0005634|GO:0043620|GO:0051403|GO:0005829|GO:0043555|GO:0002756|GO:0005737|GO:0007411|GO:0045944|GO:0002755|GO:0043154|GO:0034138|GO:0043027|GO:0048011|GO:0043066|GO:0038124|GO:0000287|GO	.	NA	-	.	NA	NA	NA	NA	NA	NA	NA	NA	NA
LNCV6_137334_PI430048170	0.000347993	2.22127	10.2472	10.0986	10.029	P	P	P	8.97265	8.9085	9.04496	P	P	P	LNCV6_137334_PI430048170	mRNA	GAGGAATTTGCTGTTGACAGCCAAAGTATAGTGTACAAGATTGATGTAACTTGATATGTA	NM_001286792	RefSeq	chr13	+	23979625	24307074	SPATA13	221178	spermatogenesis associated 13, transcript variant 3	GO:0005515|GO:0030334|GO:0030032|GO:0032587|GO:0030175|GO:0032855|GO:0030027|GO:0005085|GO:0043547|GO:0005737|GO:0016477|GO:0046847|GO:0005654|GO:0030676	.	NA	-	.	NA	NA	NA	NA	NA	NA	NA	NA	NA
LNCV6_144820_PI430048170	0.00251387	2.68689	11.1608	10.8767	10.679	P	P	P	9.4324	9.38959	9.64449	P	P	P	LNCV6_144820_PI430048170	mRNA	CTAAGTGTATCAGACTTAGGGAAAAAGTGGCACAACCTTCGATTTAAAATTCTAGTCTTT	NM_144573	RefSeq	chr1	+	77888514	77943893	NEXN	91624	nexilin (F actin binding protein), transcript variant 1	GO:0030334|GO:0048739|GO:0030018|GO:0051015|GO:0051493|GO:0042981|GO:0006468|GO:0008307|GO:0005856|GO:0004683|GO:0005925	.	NA	-	.	NA	NA	NA	NA	NA	NA	NA	NA	NA
LNCV6_127871_PI430048170	0.000713327	0.337997	6.85207	6.8578	6.90529	P	P	P	8.32351	8.52905	8.45054	P	P	P	LNCV6_127871_PI430048170	mRNA	AAGAAGTGTTTGGAATGTGCTGTAAGAATGGAGGAAGTCGTTTCCACTGTCAGCATCCTC	NM_152718	RefSeq	chr11	-	61258285	61295316	VWCE	220001	von Willebrand factor C and EGF domains	GO:0008284|GO:0005509|GO:0005576|GO:0009966	.	NA	-	.	NA	NA	NA	NA	NA	NA	NA	NA	NA
LNCV6_140936_PI430048170	1.44249e-05	3.52606	6.97583	7.0843	6.9189	P	P	P	5.24253	5.11672	5.16775	P	P	P	LNCV6_140936_PI430048170	mRNA	TTCAGAGCCACCCACCTTTTCTGTAAAGTGCTGGAATACACATACGATGCCTGAAATCTC	NM_021052	RefSeq	chr6	+	26216919	26217483	HIST1H2AE	3012	histone cluster 1, H2ae	GO:0008150|GO:0046982|GO:0005634|GO:0000786|GO:0003677|GO:0070062	.	NA	-	.	NA	NA	NA	NA	NA	NA	NA	NA	NA
LNCV6_140921_PI430048170	0.000280089	0.0291754	0.383839	0.314552	0.343337	A	A	A	5.50624	5.57869	5.23231	P	P	P	LNCV6_140921_PI430048170	mRNA	TAACTCCTCACTGTACTGATTTACTGGCGCATGAAATTCTATTAAAAATGCATTCTTCTG	NM_001170961	RefSeq	chrX	-	131273505	131289429	IGSF1	3547	immunoglobulin superfamily, member 1, transcript variant 3	GO:0005515|GO:0007165|GO:0006355|GO:0016020|GO:0034711|GO:0005576|GO:0004872|GO:0016021|GO:0015026	.	NA	-	.	NA	NA	NA	NA	NA	NA	NA	NA	NA
LNCV6_144795_PI430048170	0.000322197	3.41654	8.74359	8.64496	8.54521	P	P	P	6.83799	6.90768	6.87644	P	P	P	LNCV6_144795_PI430048170	mRNA	ATGTTCTGCTCTTGTGCCCTTCTGAGCCCACAATAAAGGCTGAGCTCTTATCTTGCAAAA	NM_000552	RefSeq	chr12	-	5948873	6124670	VWF	7450	von Willebrand factor	GO:0005515|GO:0005783|GO:0005518|GO:0051087|GO:0002020|GO:0042803|GO:0042802|GO:0001948|GO:0019865|GO:0030198|GO:0031091|GO:0051260|GO:0031093|GO:0007155|GO:0070062|GO:0033093|GO:0031589|GO:0005578|GO:0009611|GO:0030168|GO:0005576|GO:0001890|GO:0001889|GO	.	NA	-	.	NA	NA	NA	NA	NA	NA	NA	NA	NA
LNCV6_133560_PI430048170	4.02893e-05	3.78224	13.169	13.1014	13.1059	P	P	P	11.2042	11.2184	11.1969	P	P	P	LNCV6_133560_PI430048170	mRNA	GGGAGCATGAAGTACGAGGAAAACTTGAATTCCAGATTTTTAGTGCAAAGTATTTATCAT	NM_178507	RefSeq	chr11	+	120211038	120229941	OAF	220323	OAF homolog (Drosophila)	GO:0070062	.	NA	-	.	NA	NA	NA	NA	NA	NA	NA	NA	NA
LNCV6_140383_PI430048170	0.0247206	0.488218	5.73874	5.42441	5.58814	P	P	P	6.31623	6.46909	6.99543	P	P	P	LNCV6_140383_PI430048170	mRNA	GGATTATCATTCTTAGCAACACGTAACCGAAGCAATATTCTTAAGAATATTGAAGGGGTT	NM_032236	RefSeq	chr1	-	21678298	21783195	USP48	84196	ubiquitin specific peptidase 48, transcript variant 1	GO:0005739|GO:0004197|GO:0016579|GO:0005737|GO:0004843|GO:0061136|GO:0043161|GO:0005654	.	NA	-	.	NA	NA	NA	NA	NA	NA	NA	NA	NA
LNCV6_130888_PI430048170	0.000334877	6.96774	13.4139	13.2611	13.0108	P	P	P	10.4798	10.4979	10.3285	P	P	P	LNCV6_130888_PI430048170	mRNA	AACCCTTTGCTTCTTATAATGAGTGCGATATATGTTGTCGAGGCTGTTCTTCAAGAATTA	NM_005654	RefSeq	chr5	+	93583336	93594609	NR2F1	7025	nuclear receptor subfamily 2, group F, member 1	GO:0005515|GO:0010467|GO:0003700|GO:0006367|GO:0003713|GO:0003707|GO:0044323|GO:0005634|GO:0000122|GO:0043565|GO:0007165|GO:0021796|GO:0045944|GO:0043401|GO:0010977|GO:0005654|GO:0008270|GO:0004879|GO:0001764|GO:0030522	.	NA	-	.	NA	NA	NA	NA	NA	NA	NA	NA	NA
LNCV6_140525_PI430048170	0.00360212	0.158049	0.199426	0.210062	0.295947	A	A	A	2.97653	2.53254	3.12016	P	P	P	LNCV6_140525_PI430048170	mRNA	CAGCAGATACTTTGTCAGCAATACTAAGGGAAGAAACAAAGTTGAACCGTTTCTTTAATA	NM_005191	RefSeq	chr3	-	119524292	119559634	CD80	941	CD80 molecule	GO:0005515|GO:0048011|GO:0045425|GO:0005886|GO:0009986|GO:0048015|GO:0031295|GO:0007267|GO:0050731|GO:0009967|GO:0015026|GO:0035556|GO:0045086|GO:0042110|GO:0007173|GO:0008543|GO:0045087|GO:0045627|GO:0046641|GO:0016032|GO:0016021|GO:0045893|GO:0038095|GO	.	NA	-	.	NA	NA	NA	NA	NA	NA	NA	NA	NA
LNCV6_132576_PI430048170	3.33103e-06	18.0628	8.6291	8.80724	8.72921	P	P	P	4.5021	4.60366	4.5386	P	P	P	LNCV6_132576_PI430048170	mRNA	GTCAGGTTTCACAAGAAAATTTTCAAGTTTTGAAGGGAATTTGAGGTTGATCTGGTTTTC	NM_000231	RefSeq	chr13	+	23180920	23325165	SGCG	6445	sarcoglycan, gamma (35kDa dystrophin-associated glycoprotein)	GO:0048738|GO:0042383|GO:0005515|GO:0060047|GO:0005737|GO:0007517|GO:0005886|GO:0016012|GO:0061024|GO:0055001|GO:0016021|GO:0005856	.	NA	-	.	NA	NA	NA	NA	NA	NA	NA	NA	NA
LNCV6_144937_PI430048170	5.33862e-05	207.903	8.11538	8.03878	7.72208	P	P	P	0.247663	0.348631	0.206283	A	A	A	LNCV6_144937_PI430048170	mRNA	CCGAAAGGATGTTAATTATGCCTACGATGTAATAACTATTGGAATGTCATGGTCATTACA	NM_001114175	RefSeq	chr4	-	46249564	46389379	GABRA2	2555	gamma-aminobutyric acid (GABA) A receptor, alpha 2, transcript variant 2	GO:0030424|GO:0005230|GO:0030054|GO:0005886|GO:0004890|GO:0034707|GO:0007268|GO:0007214|GO:0055085|GO:0005254|GO:0034220|GO:0030285|GO:0045211|GO:0001505|GO:0006836|GO:0008503	.	NA	-	.	NA	NA	NA	NA	NA	NA	NA	NA	NA
LNCV6_133712_PI430048170	4.39953e-05	16.9646	8.5097	8.38503	8.21832	P	P	P	4.36624	4.26871	4.23627	P	P	P	LNCV6_133712_PI430048170	mRNA	CCTGGTTCCTTCGCTTGTGTTTCTGTACTTACCAAAAATCTACCATTTCAATAAATTTTG	NM_177551	RefSeq	chr12	-	122701292	122703357	HCAR2	338442	hydroxycarboxylic acid receptor 2	GO:0001781|GO:0050995|GO:0070165|GO:0007186|GO:0005886|GO:0016021|GO:0070553|GO:0033031	.	NA	-	.	NA	NA	NA	NA	NA	NA	NA	NA	NA
LNCV6_55612_PI430048170	0.00142843	0.311973	9.57687	9.22925	9.06199	P	P	P	10.9075	10.8523	11.1771	P	P	P	LNCV6_55612_PI430048170	mRNA	ACAAATACAATGAATGGCAGCAAGTCACCTGTTATCTCCAGACCAAAATCCACACCCTTA	NM_001008493	RefSeq	chr1	-	225486831	225653143	ENAH	55740	enabled homolog (Drosophila), transcript variant 1	GO:0005515|GO:0050852|GO:0001725|GO:0017124|GO:0030054|GO:0005886|GO:0050699|GO:0045202|GO:0001843|GO:0046907|GO:0003779|GO:0030175|GO:0030027|GO:0005829|GO:0005737|GO:0007411|GO:0008154|GO:0005925	.	NA	-	.	NA	NA	NA	NA	NA	NA	NA	NA	NA
LNCV6_126787_PI430048170	0.000641365	134.352	10.5552	10.6625	10.6155	P	P	P	3.56116	3.83991	3.14035	P	P	P	LNCV6_126787_PI430048170	mRNA	CAAAGTGACCAAGACATAACAAAGACCTAACAGTTGCAGATATGAGCTGTATAATTGTTG	NM_015424	RefSeq	chr11	-	74696427	74731385	CHRDL2	25884	chordin-like 2, transcript variant 1	GO:0030514|GO:0005737|GO:0001503|GO:0051216|GO:0005615|GO:0030154	.	NA	-	.	NA	NA	NA	NA	NA	NA	NA	NA	NA
LNCV6_114377_PI430048170	0.00260256	5.75654	5.9932	5.89518	6.61386	P	P	P	3.57726	3.88331	3.55155	P	P	P	LNCV6_114377_PI430048170	mRNA	TAAAATGGTGGACAGGCACCAAAGCTATTTTCTCATCTGTCCTGTGGATGAGTGGAACTG	NM_001143942	RefSeq	chr6	+	17281577	17293868	RBM24	221662	RNA binding motif protein 24, transcript variant 1	GO:0043488|GO:0005737|GO:0000166|GO:0010830|GO:0005634|GO:0003730|GO:0030154	.	NA	-	.	NA	NA	NA	NA	NA	NA	NA	NA	NA
LNCV6_137456_PI430048170	0.000692768	2.03935	7.14074	7.20784	7.03919	P	P	P	6.08863	6.14034	6.07869	P	P	P	LNCV6_137456_PI430048170	mRNA	CTTTTGATTGCACAAGCCTTTGTTTTCAGTCCTAGTGAATAAAGTTGTGTTTTCTGGAAA	NM_014353	RefSeq	chr16	+	2148649	2154140	RAB26	25837	RAB26, member RAS oncogene family	GO:0005515|GO:0009306|GO:0005886|GO:0043001|GO:0031226|GO:0003924|GO:0005525|GO:0006904|GO:0006184|GO:0045055|GO:0000139|GO:0035272|GO:0017157|GO:0032482|GO:0019003|GO:0019002|GO:0030667|GO:0005768|GO:0030658	.	NA	-	.	NA	NA	NA	NA	NA	NA	NA	NA	NA
LNCV6_140836_PI430048170	0.00808917	0.468428	6.73762	7.23866	7.16735	P	P	P	8.26733	8.19877	7.99524	P	P	P	LNCV6_140836_PI430048170	mRNA	GGATATGGCTGCTGCCGCCCATCTTGCTATGGAAGATACTGGTCCTGTGGCTTCTACTGA	NM_181616	RefSeq	chr21	+	30635263	30635461	KRTAP20-2	NA	keratin associated protein 20-2	NA	.	NA	-	.	NA	NA	NA	NA	NA	NA	NA	NA	NA
LNCV6_128936_PI430048170	0.000189967	0.0934759	5.32649	5.08874	5.34275	P	P	P	8.64342	8.65662	8.72802	P	P	P	LNCV6_128936_PI430048170	mRNA	AGCGAGCACATGAGGAAGCTGAGTCTTTCACCAATAAACAGTTGTGGTTTGTCTAAAAAA	NM_021147	RefSeq	chr5	-	55231152	55233717	CCNO	10309	cyclin O, transcript variant 1	GO:0004844|GO:0042384|GO:0007049|GO:0005737|GO:0042493|GO:0006284|GO:0005654|GO:0051301	.	NA	-	.	NA	NA	NA	NA	NA	NA	NA	NA	NA
LNCV6_145686_PI430048170	0.000464744	0.370694	6.70691	6.43571	6.48814	P	P	P	7.90528	7.96291	8.06752	P	P	P	LNCV6_145686_PI430048170	mRNA	GCTTTGAGGGTAGCCGAAACCCCTTATCTAATAAAGTCTAACTCTGTGAGAACCACAGAA	NM_001243597	RefSeq	chr11	-	125956817	126063292	CDON	50937	cell adhesion associated, oncogene regulated, transcript variant 1	GO:0005515|GO:0043497|GO:2000179|GO:0010172|GO:0021987|GO:0001708|GO:0005886|GO:0051057|GO:0007520|GO:0060059|GO:0009952|GO:0048643|GO:0007224|GO:0014816|GO:0042692|GO:0031012|GO:0051149|GO:0045666|GO:0002088|GO:0045944|GO:0001934|GO:0016021|GO:0043410|GO	.	NA	-	.	NA	NA	NA	NA	NA	NA	NA	NA	NA
LNCV6_127273_PI430048170	0.00124806	0.13596	6.27242	6.55046	6.72626	P	P	P	9.41156	9.34762	9.45979	P	P	P	LNCV6_127273_PI430048170	mRNA	CTGGTGGTTCTCTGTTTCCCCCTTTAAATGTGTTTTCTCTGCTTCAAAAATTTAATGCAT	NM_001184880	RefSeq	chrX	-	100291643	100410273	PCDH19	57526	protocadherin 19, transcript variant 3	GO:0005886|GO:0005509|GO:0016021|GO:0007156	.	NA	-	.	NA	NA	NA	NA	NA	NA	NA	NA	NA
LNCV6_136120_PI430048170	0.00605843	3.98265	5.04836	4.57249	4.29021	P	P	P	2.60781	2.56233	2.84663	A	P	P	LNCV6_136120_PI430048170	mRNA	CTCTGAGACAGTCTCTGTGTGGAATTTGCCTTAAACTGAAGTAAATTTGGTTCTTTTAGT	NM_020939	RefSeq	chr6	-	36740777	36839444	CPNE5	57699	copine V	GO:0043005|GO:0008150|GO:0003674|GO:0043025|GO:0070062	.	NA	-	.	NA	NA	NA	NA	NA	NA	NA	NA	NA
LNCV6_137643_PI430048170	1.42756e-05	80.8884	6.47701	6.49591	6.50222	P	P	P	0.0861768	0.166631	0.206283	A	A	A	LNCV6_137643_PI430048170	mRNA	CCCACAAACCTGTTAACATTGTCTTAAGGTGAAATGGCTGGAAAATCAGTATTTAACTAA	NM_002052	RefSeq	chr8	+	11704150	11760002	GATA4	2626	GATA binding protein 4	GO:0060045|GO:0005515|GO:0003289|GO:0000790|GO:0043627|GO:0003700|GO:0006366|GO:0044212|GO:0003705|GO:0060290|GO:0003281|GO:0007283|GO:0060575|GO:0001947|GO:0060008|GO:0061049|GO:0003229|GO:0001706|GO:0023019|GO:0003713|GO:0030509|GO:0000978|GO:0001701|GO	.	NA	-	.	NA	NA	NA	NA	NA	NA	NA	NA	NA
LNCV6_143733_PI430048170	4.38104e-05	0.143698	8.41916	8.16532	8.07173	P	P	P	10.9671	10.9124	11.1819	P	P	P	LNCV6_143733_PI430048170	mRNA	CCCTGGTAATGCTTTAGTCAAAGGGATATCTCTCTTGTATCAGAGGCTGTGTCTTTTAGT	NM_001850	RefSeq	chr3	+	99638595	99796733	COL8A1	1295	collagen, type VIII, alpha 1, transcript variant 1	GO:0005591|GO:0010811|GO:0005576|GO:0001525|GO:0048593|GO:0035987|GO:0050673|GO:0043231|GO:0031012|GO:0022617|GO:0030198|GO:0030574|GO:0005788|GO:0007155|GO:0070062	.	NA	-	.	NA	NA	NA	NA	NA	NA	NA	NA	NA
LNCV6_139548_PI430048170	0.0346783	0.433086	3.54165	4.45597	3.89329	P	P	P	5.35675	5.11169	5.18278	P	P	P	LNCV6_139548_PI430048170	mRNA	GTGGGAAGGGATAATTTATCATACTGAGACTTGTTCTTGGTTCCTGTTTGAAACTAAAAT	NM_003394	RefSeq	chr12	-	48965339	48971858	WNT10B	7480	wingless-type MMTV integration site family, member 10B	GO:0071464|GO:0006629|GO:0008284|GO:0071300|GO:0045599|GO:0045899|GO:0090263|GO:0050680|GO:0032434|GO:0005615|GO:0007224|GO:0005109|GO:0051091|GO:0030858|GO:0050909|GO:0002062|GO:0071374|GO:0000086|GO:0030182|GO:0007050|GO:0016055|GO:0060070|GO:0014835|GO	.	NA	-	.	NA	NA	NA	NA	NA	NA	NA	NA	NA
LNCV6_136952_PI430048170	6.09003e-05	12.8909	13.2787	13.1893	12.9151	P	P	P	9.55222	9.44278	9.33987	P	P	P	LNCV6_136952_PI430048170	mRNA	GGAATTTTACATAAATCTTTGTTAATTACTGAGTGGGCAAGTAGACTTCCTGTCTTTGCT	NM_006714	RefSeq	chr6	+	122789048	122809719	SMPDL3A	10924	sphingomyelin phosphodiesterase, acid-like 3A, transcript variant 1	GO:0005515|GO:0008150|GO:0006685|GO:0016798|GO:0004767|GO:0005615|GO:0070062	.	NA	-	.	NA	NA	NA	NA	NA	NA	NA	NA	NA
LNCV6_138646_PI430048170	0.00962937	2.05419	5.85492	5.51309	5.77602	P	P	P	4.69726	4.67885	4.67389	P	P	P	LNCV6_138646_PI430048170	mRNA	GGCCTGGTCTAAGAAAACACATTGCAATCTATTTTGGCAGACTTCTTTCAAATAAAATAC	NM_005602	RefSeq	chr3	+	170418864	170434691	CLDN11	5010	claudin 11, transcript variant 1	GO:0016338|GO:0005886|GO:0005198|GO:0045178|GO:0016021|GO:0007283|GO:0005923|GO:0008366|GO:0070062|GO:0042802	.	NA	-	.	NA	NA	NA	NA	NA	NA	NA	NA	NA
LNCV6_142684_PI430048170	0.0489396	0.491842	3.68335	3.27828	2.6743	P	P	A	4.50995	4.31227	4.01558	P	P	P	LNCV6_142684_PI430048170	mRNA	GGTGCCTAAAAACTCAAGAACCATTGATAAGTGAGATCACTCAAAATGAGCTGATATATT	NM_024592	RefSeq	chr4	+	55346220	55373099	SRD5A3	79644	steroid 5 alpha-reductase 3	GO:0003865|GO:0005783|GO:0006702|GO:0019348|GO:0016095|GO:0044281|GO:0016628|GO:0047751|GO:0005789|GO:0016021|GO:0006488|GO:0044267|GO:0006489|GO:0008202|GO:0055114|GO:0018279|GO:0043687	.	NA	-	.	NA	NA	NA	NA	NA	NA	NA	NA	NA
LNCV6_143679_PI430048170	0.00202047	9.9583	6.88386	6.63929	6.26719	P	P	P	3.38032	3.26103	3.26369	P	P	P	LNCV6_143679_PI430048170	mRNA	TTGAGATACATCCTGTCATCAGTATATTTCAGAATACATGCAATGCACTAGCAAGTTACA	NM_001289	RefSeq	chrX	-	155276206	155334681	CLIC2	1193	chloride intracellular channel 2	GO:0005515|GO:0005244|GO:0034707|GO:0051099|GO:0010881|GO:0005634|GO:0004364|GO:0005254|GO:0004602|GO:0005622|GO:0007165|GO:0005737|GO:0010880|GO:0060315|GO:0006810|GO:0055114	.	NA	-	.	NA	NA	NA	NA	NA	NA	NA	NA	NA
LNCV6_135208_PI430048170	0.00561652	2.19958	5.1581	5.24179	5.08327	P	P	P	4.23274	4.00062	3.81154	P	P	P	LNCV6_135208_PI430048170	mRNA	GGGCCAGAAAAATCTTGTACAGAATAATGATTTCTCCTAATGTAAATCTTGGAAAGGGTT	NM_052864	RefSeq	chr4	-	112275625	112285903	TIFA	92610	TRAF-interacting protein with forkhead-associated domain	GO:0005515|GO:0007249	.	NA	-	.	NA	NA	NA	NA	NA	NA	NA	NA	NA
LNCV6_136641_PI430048170	0.00308856	2.35679	6.8545	6.75789	6.77353	P	P	P	5.72207	5.54245	5.39406	P	P	P	LNCV6_136641_PI430048170	mRNA	TTCTCCTAATTTCTTCTGCCCGAAGGGTAAGTGGTGCGTCCAGCTTACACAATCATAATT	NM_031942	RefSeq	chr2	+	173354832	173368990	CDCA7	83879	cell division cycle associated 7, transcript variant 1	GO:0006355|GO:0005737|GO:0042127|GO:0006915|GO:0005654|GO:0005634|GO:0006351	.	NA	-	.	NA	NA	NA	NA	NA	NA	NA	NA	NA
LNCV6_131671_PI430048170	0.0248704	0.424627	2.15431	2.00559	1.27664	A	A	A	3.05691	3.34371	2.8423	P	P	P	LNCV6_131671_PI430048170	mRNA	TTGTCTTACTCACTTCTGACACCACTGCTGAATCTGCTTATCTACAGTTTGCGAAATAGT	NM_001004461	RefSeq	chr11_KI270829v1_alt	-	159218	160163	OR10A6	NA	olfactory receptor, family 10, subfamily A, member 6 (gene/pseudogene)	NA	.	NA	-	.	NA	NA	NA	NA	NA	NA	NA	NA	NA
LNCV6_134161_PI430048170	0.0020498	2.36211	13.7702	13.7039	13.4364	P	P	P	12.4985	12.3579	12.3501	P	P	P	LNCV6_134161_PI430048170	mRNA	CAATAGTTTCCCAATCACATAGCAGGCAAGAGATATTTTGTACTTTTTGATCCACTGTAA	NM_032199	RefSeq	chr10	+	61901253	62096948	ARID5B	84159	AT rich interactive domain 5B (MRF1-like), transcript variant 1	GO:0005515|GO:0030325|GO:0044212|GO:0006325|GO:0048705|GO:0005634|GO:0009791|GO:0010761|GO:0048644|GO:0051091|GO:0035264|GO:0060021|GO:0045444|GO:0048468|GO:0000977|GO:0006357|GO:0001822|GO:0003713|GO:0000122|GO:0003677|GO:0001227|GO:0006351|GO:0001889|GO	.	NA	-	.	NA	NA	NA	NA	NA	NA	NA	NA	NA
LNCV6_134838_PI430048170	5.17385e-05	4.23487	11.0352	11.0171	10.7941	P	P	P	8.93558	8.91506	8.7543	P	P	P	LNCV6_134838_PI430048170	mRNA	GCTTCAAGAACATTCAAGCTGTTGGTGTGTTAAAAAATGCATTGTATTGATTTGTACTGG	NM_001130518	RefSeq	chr8	-	19404160	19602545	CSGALNACT1	55790	chondroitin sulfate N-acetylgalactosaminyltransferase 1, transcript variant 1	GO:0008037|GO:0051216|GO:0008283|GO:0044281|GO:0015014|GO:0009653|GO:0046872|GO:0005622|GO:0030206|GO:0030198|GO:0032580|GO:0030204|GO:0047238|GO:0030203|GO:0047237|GO:0050653|GO:0008955|GO:0050650|GO:0050651|GO:0005975|GO:0019276|GO:0015020|GO:0008376|GO	.	NA	-	.	NA	NA	NA	NA	NA	NA	NA	NA	NA
LNCV6_142849_PI430048170	0.00457577	3.25512	4.5493	4.67371	4.65611	P	P	P	3.17831	2.8708	2.68085	P	P	P	LNCV6_142849_PI430048170	mRNA	CCTGCCAGTTAGTACTGTATTTTGCATTCATTAATAAAAGACACCGGTGGAAAGAAAAAA	NM_001159531	RefSeq	chr14	-	100537146	100568070	BEGAIN	57596	brain-enriched guanylate kinase-associated, transcript variant 1	GO:0005515|GO:0005737|GO:0016020|GO:0043025|GO:0030425	.	NA	-	.	NA	NA	NA	NA	NA	NA	NA	NA	NA
LNCV6_129435_PI430048170	0.00745828	0.482508	9.9366	9.75315	9.53423	P	P	P	10.7705	10.7608	10.8721	P	P	P	LNCV6_129435_PI430048170	mRNA	GAACTACTTGAGATGACTTAAGAAGCATCCCATGCAAATATCTTGTTTTGCCCTAATAAA	NM_004863	RefSeq	chr14	-	77505996	77616767	SPTLC2	9517	serine palmitoyltransferase, long chain base subunit 2	GO:0006665|GO:0004758|GO:0006686|GO:0030148|GO:0044281|GO:0005739|GO:0030170|GO:0005789|GO:0016021|GO:0017059|GO:0046513|GO:0046512|GO:0046511	.	NA	-	.	NA	NA	NA	NA	NA	NA	NA	NA	NA
LNCV6_91806_PI430048170	0.000423147	7.34459	9.33044	9.24048	9.31158	P	P	P	6.4964	6.51137	6.22913	P	P	P	LNCV6_91806_PI430048170	mRNA	TGAAAAATGGCAAATCCAACTGACCAGAAGGAAGGAGGAAGCTTATTGGTGGCTGTTCCT	NM_002089	RefSeq	chr4	-	74097036	74099280	CXCL2	2920	chemokine (C-X-C motif) ligand 2	GO:0005515|GO:0008009|GO:0070098|GO:0002237|GO:0005576|GO:0045236|GO:0005615|GO:0002690|GO:0006955|GO:0006954|GO:0006935|GO:0007186|GO:0060326|GO:0042127|GO:0032496	.	NA	-	.	NA	NA	NA	NA	NA	NA	NA	NA	NA
LNCV6_137104_PI430048170	0.00690856	2.39009	7.60524	7.68468	7.42109	P	P	P	6.31772	6.57269	6.00676	P	P	P	LNCV6_137104_PI430048170	mRNA	TCAAAGTGTACACTACTGATGCTGTTTGTTGTACTGAGAGCACGTACCAATAAAAATGTT	NM_014243	RefSeq	chr4	-	72280968	72568799	ADAMTS3	9508	ADAM metallopeptidase with thrombospondin type 1 motif, 3	GO:0005515|GO:0005578|GO:0005576|GO:1900748|GO:0005615|GO:0010573|GO:0031012|GO:0004175|GO:0016485|GO:0030198|GO:0030199|GO:0030574|GO:0006508|GO:0008270|GO:0043206|GO:0032964|GO:0004222|GO:0008201|GO:0070062	.	NA	-	.	NA	NA	NA	NA	NA	NA	NA	NA	NA
LNCV6_134644_PI430048170	0.00500777	3.61668	7.89368	7.78364	7.78054	P	P	P	6.01917	6.17985	5.64734	P	P	P	LNCV6_134644_PI430048170	mRNA	CTTCAGCTTGCCCTTACTGCCACTGATATTGGTAATGTTCTTTTTTGTAAAATGTTTGTA	NM_002353	RefSeq	chr1	-	58575422	58577494	TACSTD2	4070	tumor-associated calcium signal transducer 2	GO:0005515|GO:0050678|GO:0008283|GO:2000738|GO:2000146|GO:0005634|GO:0060675|GO:0005615|GO:0016328|GO:0005829|GO:0051497|GO:1900028|GO:0009925|GO:0016020|GO:0005887|GO:1900025|GO:0090191|GO:0004872|GO:0007601|GO:0007166|GO:0070062|GO:0010633	.	NA	-	.	NA	NA	NA	NA	NA	NA	NA	NA	NA
LNCV6_131522_PI430048170	0.000356022	2.9484	8.90286	8.70899	8.59484	P	P	P	7.29279	7.12258	7.12165	P	P	P	LNCV6_131522_PI430048170	mRNA	CTCCCTAATTCAGACCCAGCCTCAAGAGGAAAGGGAGTAAAATAAAACTAACTTGTTTAT	NM_020435	RefSeq	chr1	+	228149713	228159826	GJC2	57165	gap junction protein, gamma 2, 47kDa	GO:0005243|GO:0043209|GO:0007267|GO:0009636|GO:0005922|GO:0016021|GO:0055085	.	NA	-	.	NA	NA	NA	NA	NA	NA	NA	NA	NA
LNCV6_136158_PI430048170	6.62204e-05	2.19328	10.3649	10.2999	10.4644	P	P	P	9.22694	9.3252	9.17867	P	P	P	LNCV6_136158_PI430048170	mRNA	GGGCCTGGGAGGAAGATGTTTACATTTTTAAAGGTACACTGGTATTTATATTTCAAACAT	NM_005985	RefSeq	chr20	+	49982975	49988883	SNAI1	6615	snail family zinc finger 1	GO:0005515|GO:2000810|GO:0010718|GO:0005634|GO:0001837|GO:0046872|GO:0031069|GO:0005737|GO:0061314|GO:0060972|GO:0060021|GO:0019900|GO:0001707|GO:0000977|GO:0030335|GO:0060707|GO:0000122|GO:0060806|GO:0001649|GO:0001078|GO:0016477|GO:0043518|GO:0060536|GO	.	NA	-	.	NA	NA	NA	NA	NA	NA	NA	NA	NA
LNCV6_136140_PI430048170	0.0162126	3.40839	9.64416	9.45888	8.74284	P	P	P	7.72511	7.39841	7.54401	P	P	P	LNCV6_136140_PI430048170	mRNA	GGGTTGTGTGGGAAGAGTACTTATTATTGTGTTTTCTTCAGTGTAATTGTTCTTGGTAAT	NM_021637	RefSeq	chrX	+	101078846	101096366	TMEM35	59353	transmembrane protein 35	GO:0008150|GO:0003674|GO:0016023|GO:0016021|GO:0005575|GO:0005778	.	NA	-	.	NA	NA	NA	NA	NA	NA	NA	NA	NA
LNCV6_138742_PI430048170	0.00247798	0.477106	4.88686	4.69568	4.52636	P	P	P	5.80668	5.85624	5.66462	P	P	P	LNCV6_138742_PI430048170	mRNA	GATGTGTGTCAATCAGTTCTCTGAATCTTTTACTGAAACTGAGACAGGAAAATAAAACTG	NM_001263	RefSeq	chr4	+	84582903	84651340	CDS1	1040	CDP-diacylglycerol synthase (phosphatidate cytidylyltransferase) 1	GO:0006661|GO:0005783|GO:0044281|GO:0007165|GO:0004605|GO:0005789|GO:0016024|GO:0004142|GO:0016021|GO:0006644|GO:0006657|GO:0007602|GO:0046474	.	NA	-	.	NA	NA	NA	NA	NA	NA	NA	NA	NA
LNCV6_130258_PI430048170	1.00723e-05	5.03196	10.484	10.284	10.4305	P	P	P	8.0829	8.14697	7.97757	P	P	P	LNCV6_130258_PI430048170	mRNA	AGCCCAGTTAGCAAGGTGCCGGGTCACCCTGCAGGTTCCCATAAAAACGATTTGCAGCCA	NM_016246	RefSeq	chr19	-	48813016	48836677	HSD17B14	51171	hydroxysteroid (17-beta) dehydrogenase 14	GO:0005515|GO:0006706|GO:0004303|GO:0047045|GO:0055114|GO:0005829	.	NA	-	.	NA	NA	NA	NA	NA	NA	NA	NA	NA
LNCV6_143690_PI430048170	0.00601114	0.281975	13.285	13.0707	12.7092	P	P	P	14.8788	14.7935	14.9261	P	P	P	LNCV6_143690_PI430048170	mRNA	AAGATGGGAAACTGAATAAAGCAGTTGATCAGCATCATTGGAACATGGGGACGAGTGACG	NM_014220	RefSeq	chr3	-	149369017	149377781	TM4SF1	4071	transmembrane 4 L six family member 1	GO:0008150|GO:0003674|GO:0005887	.	NA	-	.	NA	NA	NA	NA	NA	NA	NA	NA	NA
LNCV6_145069_PI430048170	1.37657e-06	65.5372	6.90059	7.20508	7.08478	P	P	P	1.21864	0.943773	0.922152	A	A	A	LNCV6_145069_PI430048170	mRNA	GGCAGGAAAGAGTGGTTATTTATGTACTTAAAGTTTCATTAAAGTTAAAATCGGAAAAAA	NM_207336	RefSeq	chr7	-	149764363	149773206	ZNF467	168544	zinc finger protein 467	GO:0006355|GO:0005634|GO:0003677|GO:0046872|GO:0006351	.	NA	-	.	NA	NA	NA	NA	NA	NA	NA	NA	NA
LNCV6_130118_PI430048170	1.36657e-05	0.242385	8.42422	8.26918	8.27239	P	P	P	10.2948	10.4028	10.4048	P	P	P	LNCV6_130118_PI430048170	mRNA	GCGTTATATTGCGATTGGCACTTTATGCTGACCATCGGTAACGGACATTTATCACTGGAG	NM_145260	RefSeq	chr2	-	19351484	19358611	OSR1	130497	odd-skipped related transciption factor 1	GO:0008406|GO:0001657|GO:0071300|GO:0048793|GO:0001655|GO:0072239|GO:0072234|GO:0072183|GO:0030154|GO:0072075|GO:0072180|GO:0007507|GO:0002062|GO:0072133|GO:0050679|GO:0030501|GO:0090094|GO:0072190|GO:0072208|GO:0000122|GO:0072207|GO:0072184|GO:0060272|GO	.	NA	-	.	NA	NA	NA	NA	NA	NA	NA	NA	NA
LNCV6_142672_PI430048170	0.00691736	2.58737	5.85022	6.06983	6.15919	P	P	P	4.69628	4.92162	4.29623	P	P	P	LNCV6_142672_PI430048170	mRNA	CTGCCGTTGCTAAATGATTTAATAATATTGTAATTCTGTATTTCTTTGGGGGGAAAAGGC	NM_194449	RefSeq	chr18	+	62715438	62980443	PHLPP1	23239	PH domain and leucine rich repeat protein phosphatase 1	GO:0005515|GO:0048011|GO:0048015|GO:0006915|GO:0005634|GO:0046872|GO:0005829|GO:0007173|GO:0016020|GO:0008543|GO:0009649|GO:0016311|GO:0045087|GO:0004721|GO:0038095	.	NA	-	.	NA	NA	NA	NA	NA	NA	NA	NA	NA
LNCV6_144437_PI430048170	1.8583e-05	5.82657	9.49946	9.37836	9.32162	P	P	P	6.82462	6.91764	6.83315	P	P	P	LNCV6_144437_PI430048170	mRNA	GCTGAGCCGGCAGCTGAAAATCTAACTCATAATTTATGTTGTAGAGAAATAGAATTACCT	NM_173576	RefSeq	chr10	-	27672873	27745849	MKX	283078	mohawk homeobox, transcript variant 1	GO:0006366|GO:0005634|GO:0000122|GO:0000978|GO:0045662|GO:0001078|GO:0002932|GO:0001077|GO:0007517|GO:0032967|GO:0035990|GO:0045944|GO:0030199|GO:0001085	.	NA	-	.	NA	NA	NA	NA	NA	NA	NA	NA	NA
LNCV6_145547_PI430048170	4.64069e-06	0.0284065	4.01215	3.8199	4.11537	P	P	P	9.22624	9.22227	8.90416	P	P	P	LNCV6_145547_PI430048170	mRNA	ATGCCAAGAAAGATGTTGTGAACACAAAGATGTTTGAGGAGCTCAAGAGCCGTCTGGACA	NM_003278	RefSeq	chr3	+	45026266	45036071	CLEC3B	7123	C-type lectin domain family 3, member B	GO:0001652|GO:0071310|GO:0005509|GO:0071560|GO:0005576|GO:0030282|GO:0005615|GO:0031012|GO:0001501|GO:0005737|GO:0001503|GO:0010756|GO:0030246|GO:0008201|GO:0070062|GO:0036143	.	NA	-	.	NA	NA	NA	NA	NA	NA	NA	NA	NA
LNCV6_127484_PI430048170	0.00454494	2.14114	8.46033	8.25365	7.98599	P	P	P	7.30513	7.22802	6.87515	P	P	P	LNCV6_127484_PI430048170	mRNA	ATGCCATGTCTGATACCTTTAAGTCCATAAGCATTCAATTTTCTCATTTCCACCTTCATC	NM_001145427	RefSeq	chr5	+	54517758	54546586	SNX18	112574	sorting nexin 18, transcript variant 3	GO:0005515|GO:0000281|GO:0030136|GO:0005546|GO:0006886|GO:0036089|GO:0031234|GO:0006897|GO:0030426|GO:0043547|GO:0016050|GO:0007067|GO:0016197|GO:0043025|GO:0016023|GO:0030659|GO:0010008|GO:0070062|GO:0005768	.	NA	-	.	NA	NA	NA	NA	NA	NA	NA	NA	NA
LNCV6_134241_PI430048170	0.00039924	34.4106	5.49528	5.66606	5.39821	P	P	P	0.788869	0.177007	0.206283	A	A	A	LNCV6_134241_PI430048170	mRNA	GGACACCTCCGAGAGAGTGGAGGGAAAATGTGTGAGAAATAAATTCTCCTAAATACTCGG	NM_003802	RefSeq	chr17	-	10300865	10373005	MYH13	8735	myosin, heavy chain 13, skeletal muscle	GO:0005516|GO:0032982|GO:0000146|GO:0006936|GO:0008152|GO:0003779|GO:0005859|GO:0030016|GO:0005524|GO:0070062|GO:0009267	.	NA	-	.	NA	NA	NA	NA	NA	NA	NA	NA	NA
LNCV6_130674_PI430048170	0.00264171	22.8376	5.3623	5.57808	5.18945	P	P	P	1.46196	0.419691	0.483732	A	A	A	LNCV6_130674_PI430048170	mRNA	CAGGAAAGAGTGGTTTCTGCGTGTGTATATTTGTAATATATGATATTTTTCATGCTCCAC	NM_007197	RefSeq	chr12	+	130162458	130165740	FZD10	11211	frizzled class receptor 10	GO:0005515|GO:0042813|GO:0017147|GO:0009986|GO:0071300|GO:0004930|GO:0034259|GO:0038031|GO:0032855|GO:0005737|GO:0007186|GO:0005887|GO:0030182|GO:0032956|GO:0043507|GO:0060070	.	NA	-	.	NA	NA	NA	NA	NA	NA	NA	NA	NA
LNCV6_136179_PI430048170	0.000391763	7.34932	3.65121	2.99193	3.23911	P	P	P	0.744032	0.31983	0.206283	A	A	A	LNCV6_136179_PI430048170	mRNA	GGTGAAAAGCGAATCTGCAGAATAACTGTCAACGTTTTTCATTCTTGTTTTACAAACCTA	NM_001293070	RefSeq	chr7	+	29194504	29514335	CHN2	1124	chimerin 2, transcript variant 4	GO:0043547|GO:0005515|GO:0051056|GO:0016020|GO:0007264|GO:0005070|GO:0009967|GO:0046872|GO:0005829|GO:0005096	.	NA	-	.	NA	NA	NA	NA	NA	NA	NA	NA	NA
LNCV6_142386_PI430048170	0.000216263	4.11209	6.90357	6.61309	6.76717	P	P	P	4.492	4.82059	4.8404	P	P	P	LNCV6_142386_PI430048170	mRNA	ACATAAAATCTGGGAGCCCAGAGCTGCTGAGGTGTGGTCAGCTCCCCTAAAATGGGCACG	NM_014460	RefSeq	chr22	+	41561009	41576666	CSDC2	27254	cold shock domain containing C2, RNA binding	GO:0006397|GO:0006355|GO:0005737|GO:0003723|GO:0005634|GO:0003677	.	NA	-	.	NA	NA	NA	NA	NA	NA	NA	NA	NA
LNCV6_93108_PI430048170	0.00121814	2.77105	5.31545	5.12495	5.22253	P	P	P	3.76815	3.91808	3.54787	P	P	P	LNCV6_93108_PI430048170	mRNA	TGTTTACCTGCTATGGAAAGAAGATGCATTTAAGTTTCCTGCAGTTTCACCCTGGAAATT	NM_001129891	RefSeq	chr5	-	169863714	169980740	FAM196B	NA	family with sequence similarity 196, member B	NA	.	NA	-	.	NA	NA	NA	NA	NA	NA	NA	NA	NA
LNCV6_139512_PI430048170	0.000135823	10.4562	9.17254	9.0825	8.96856	P	P	P	5.80007	5.79582	5.4487	P	P	P	LNCV6_139512_PI430048170	mRNA	CACGTTGTTTCACATCTGGTTAGGGGGCAGATTTTAAAATGTAGTTTTGTAATGTTACAT	NM_053277	RefSeq	chr21	+	34669388	34718221	CLIC6	54102	chloride intracellular channel 6	GO:0005737|GO:0031749|GO:0005244|GO:0005886|GO:0034707|GO:0034765|GO:0008022|GO:0005254|GO:0042803|GO:0031751|GO:0070062|GO:0031750	.	NA	-	.	NA	NA	NA	NA	NA	NA	NA	NA	NA
LNCV6_144825_PI430048170	0.00378508	0.421416	4.34706	4.63312	4.53054	P	P	P	5.77232	5.73067	5.76186	P	P	P	LNCV6_144825_PI430048170	mRNA	TTCTTCTATATTGGCTGGTAAATTGCCATGGCCCTGAGCCACTGAGTATGTTCATTGCCA	NM_080680	RefSeq	chr6_GL000252v2_alt	-	4406190	4435967	COL11A2	1302	collagen, type XI, alpha 2, transcript variant 1	GO:0005515|GO:0005592|GO:0051216|GO:0007605|GO:0005576|GO:0046872|GO:0001501|GO:0022617|GO:0030020|GO:0030198|GO:0030199|GO:0030574|GO:0060021|GO:0005788|GO:0030674|GO:0060023	.	NA	-	.	NA	NA	NA	NA	NA	NA	NA	NA	NA
LNCV6_139959_PI430048170	0.0031315	0.126607	0.321575	0.296088	0.315625	A	A	A	3.6075	3.11196	3.09826	P	P	P	LNCV6_139959_PI430048170	mRNA	AGAAGACAATTGTTGCTTATGAAAGAAAGCTTTAGCTGTCTCTGTTTTGTAAGCTTTCAG	NM_001244753	RefSeq	chr1	-	161623197	161631462	FCGR3B	2215	Fc fragment of IgG, low affinity IIIb, receptor (CD16b), transcript variant 1	GO:0006955|GO:0005886|GO:0019864|GO:0031225|GO:0070062	.	NA	-	.	NA	NA	NA	NA	NA	NA	NA	NA	NA
LNCV6_130550_PI430048170	0.000598323	0.150393	3.71134	3.802	3.37775	P	P	P	6.47787	6.32988	6.31074	P	P	P	LNCV6_130550_PI430048170	mRNA	AGAAAAGCCTTGATAAAACGTCATCTCCATGTAATTTAGAGAAGGATAACCTTGACTGTA	NM_001141919	RefSeq	chrX	+	2752051	2816501	XG	7499	Xg blood group, transcript variant 2	GO:0008150|GO:0003674|GO:0005887	.	NA	-	.	NA	NA	NA	NA	NA	NA	NA	NA	NA
LNCV6_127781_PI430048170	0.00022473	3.00848	11.2332	11.195	10.9746	P	P	P	9.61585	9.58103	9.44661	P	P	P	LNCV6_127781_PI430048170	mRNA	GTACATCTTGTTTGTAGCACACTTGAGTTTGTGTATTCCATTGACATCAAATGTGACAAT	NM_018645	RefSeq	chr2	-	238238266	238240124	HES6	55502	hes family bHLH transcription factor 6, transcript variant 1	GO:0003712|GO:0005667|GO:0006355|GO:0003700|GO:0006357|GO:0046983|GO:0005634|GO:0003677|GO:0030154|GO:0006351|GO:0008134|GO:0007399	.	NA	-	.	NA	NA	NA	NA	NA	NA	NA	NA	NA
LNCV6_137205_PI430048170	0.0119201	3.42084	5.08849	5.21283	5.28499	P	P	P	3.61448	3.62281	2.92941	P	P	P	LNCV6_137205_PI430048170	mRNA	TTACTCAGCCTAAGGAAACAAGTACACTCCACACATGCATAAAGGAAATCAAATGTTATT	NM_001244950	RefSeq	chr10	-	72059033	72088773	SPOCK2	9806	sparc/osteonectin, cwcv and kazal-like domains proteoglycan (testican) 2, transcript variant 3	GO:0019800|GO:0007165|GO:0030198|GO:0010811|GO:0005509|GO:0050840|GO:0005578|GO:0045595|GO:0005539|GO:0007416	.	NA	-	.	NA	NA	NA	NA	NA	NA	NA	NA	NA
LNCV6_134939_PI430048170	0.00212187	8.31426	4.82211	4.98649	4.87781	P	P	P	1.64285	2.18421	1.62476	A	A	A	LNCV6_134939_PI430048170	mRNA	GAAATGGCGTTACCTGCCACTGTTGTTAAGTGTTTACTTTGTATCAATACTGAATTGTTA	NM_052909	RefSeq	chr5	+	140257	189972	PLEKHG4B	153478	pleckstrin homology domain containing, family G (with RhoGef domain) member 4B	GO:0032321|GO:0005089	.	NA	-	.	NA	NA	NA	NA	NA	NA	NA	NA	NA
LNCV6_144374_PI430048170	0.000670571	0.00858957	1.50359	1.8576	2.21647	A	A	A	8.71927	8.819	8.71422	P	P	P	LNCV6_144374_PI430048170	mRNA	TTGTTCACCACCTGTCTTGCTTAAGCTACAAAATAAATGCATTTGACTGCACAGAAAAAA	NM_138409	RefSeq	chr6	+	84033700	84090886	MRAP2	112609	melanocortin 2 receptor accessory protein 2	GO:0005515|GO:0007631|GO:0005886|GO:0005783|GO:0030819|GO:0031780|GO:0042802|GO:0097009|GO:0070996|GO:0006112|GO:0031783|GO:0031781|GO:0034394|GO:0031782|GO:0005789|GO:0016021	.	NA	-	.	NA	NA	NA	NA	NA	NA	NA	NA	NA
LNCV6_52468_PI430048170	0.0033518	2.04295	11.0533	11.1993	11.1062	P	P	P	10.1216	10.2306	9.89889	P	P	P	LNCV6_52468_PI430048170	mRNA	CACAGCTATTGACTCTATTTTCTGAAGGCAAAAATGCATGTTTGTTAGAATGGAAACAGA	NM_012093	RefSeq	chr1	+	77282601	77559969	AK5	26289	adenylate kinase 5, transcript variant 2	GO:0046034|GO:0015949|GO:0005815|GO:0004550|GO:0009220|GO:0055086|GO:0044281|GO:0004017|GO:0009142|GO:0019206|GO:0005524|GO:0005829|GO:0006165|GO:0005737|GO:0006172|GO:0006173	.	NA	-	.	NA	NA	NA	NA	NA	NA	NA	NA	NA
LNCV6_131608_PI430048170	0.00504342	0.382025	6.11141	5.88814	5.49561	P	P	P	7.40554	7.02751	7.26769	P	P	P	LNCV6_131608_PI430048170	mRNA	TACTGAACCTAATGATGCAGATGGATGGCACATCAGTATAATAAATGATGGAAAACGGTT	NM_033127	RefSeq	chr1	-	177929106	177969915	SEC16B	89866	SEC16 homolog B (S. cerevisiae)	GO:0010628|GO:0070863|GO:0000139|GO:0005789|GO:0007031|GO:0048208|GO:0070972|GO:0015031|GO:0007029|GO:0043231|GO:0016559	.	NA	-	.	NA	NA	NA	NA	NA	NA	NA	NA	NA
LNCV6_134470_PI430048170	7.32682e-05	5.34189	9.02493	9.06328	8.78907	P	P	P	6.64336	6.53124	6.45965	P	P	P	LNCV6_134470_PI430048170	mRNA	CTAGTCAGAGTGACTCAGCAGAGATTATTTTGTTCTCTTGTGCAATTTATTCTGTGTCAT	NM_152399	RefSeq	chr4	-	121758929	121765185	TMEM155	132332	transmembrane protein 155	GO:0005576	.	NA	-	.	NA	NA	NA	NA	NA	NA	NA	NA	NA
LNCV6_134408_PI430048170	2.46689e-07	0.0249845	6.33004	6.51357	6.46123	P	P	P	11.7112	11.7046	11.8583	P	P	P	LNCV6_134408_PI430048170	mRNA	ACGAGAAAGTATCTATTTTTGGCTAAATAAATGAGCTGCTGCCACTTTGACTATAACCCG	NM_024336	RefSeq	chr16	-	54283299	54286466	IRX3	79191	iroquois homeobox 3	GO:0043565|GO:0001656|GO:0030424|GO:0006355|GO:0005737|GO:0045665|GO:0045666|GO:0007498|GO:0005634|GO:0072086|GO:0006351	.	NA	-	.	NA	NA	NA	NA	NA	NA	NA	NA	NA
LNCV6_128720_PI430048170	0.0114221	0.363012	2.43663	1.86198	1.60194	A	A	A	3.73148	3.2441	3.39664	P	P	P	LNCV6_128720_PI430048170	mRNA	TCTCCACTCCGAAGCAGTTGCTATTGGTCCAAGAGGATGCTCGGGTAGTCTTCGGTGGCT	NM_139022	RefSeq	chr11	+	2302012	2318200	TSPAN32	10077	tetraspanin 32	GO:0070527|GO:0050688|GO:0005622|GO:0003674|GO:0008285|GO:0030886|GO:0009986|GO:0007229|GO:0007010|GO:0070442|GO:0007267|GO:0042832	.	NA	-	.	NA	NA	NA	NA	NA	NA	NA	NA	NA
LNCV6_133298_PI430048170	1.58088e-05	10.3684	8.41279	8.36249	8.15503	P	P	P	5.04	4.89164	4.88362	P	P	P	LNCV6_133298_PI430048170	mRNA	CTGCTATTTATTCTTTATAATATCCCGTGTAGTAAATGAGAAAGAAGTGCAGAGCAGGAT	NM_005450	RefSeq	chr17	+	56593698	56595590	NOG	9241	noggin	GO:0005515|GO:0071773|GO:0060044|GO:0051216|GO:0048706|GO:0060302|GO:0005615|GO:0060676|GO:2000313|GO:0042803|GO:0090193|GO:0050679|GO:0030336|GO:0001706|GO:0001707|GO:0001843|GO:0030509|GO:0000122|GO:0001701|GO:0001649|GO:0008045|GO:0001501|GO:0061053|GO	.	NA	-	.	NA	NA	NA	NA	NA	NA	NA	NA	NA
LNCV6_128835_PI430048170	0.00730309	0.21006	3.99766	3.2567	3.47892	P	P	P	5.89872	5.91143	5.77542	P	P	P	LNCV6_128835_PI430048170	mRNA	GAACCTTGTGCCGGCCAGGCCCAGTTTCCTTGTGTGATACACTAATGTATTTGCTTTTTT	NM_000299	RefSeq	chr1	+	201283451	201332993	PKP1	5317	plakophilin 1, transcript variant 1b	GO:0030057|GO:0005515|GO:0005882|GO:0005886|GO:0006915|GO:0005634|GO:0007275|GO:0030280|GO:0019215|GO:0006921|GO:0043231|GO:0007165|GO:0016337|GO:0045110|GO:0005654|GO:0004871|GO:0007155|GO:0005521|GO:0070062	.	NA	-	.	NA	NA	NA	NA	NA	NA	NA	NA	NA
LNCV6_141698_PI430048170	0.000407926	3.12376	5.53129	5.89452	5.7651	P	P	P	4.11456	4.20912	3.94862	P	P	P	LNCV6_141698_PI430048170	mRNA	GTGGACCCTGTGTGAATGAGAAAATTCAGTTATAAATTGTAATAAAACCTGCTTACTGGA	NM_001270470	RefSeq	chr12	+	93571680	93576745	SOCS2	8835	suppressor of cytokine signaling 2, transcript variant 5	GO:0005515|GO:0043066|GO:0016567|GO:0005159|GO:0046627|GO:0019221|GO:0005131|GO:0007568|GO:0060396|GO:0009967|GO:0060397|GO:0009966|GO:0001558|GO:0007259|GO:0046426|GO:0032870|GO:0005829|GO:0005737|GO:0008269|GO:0005070|GO:0004860|GO:0006469|GO:0032355	.	NA	-	.	NA	NA	NA	NA	NA	NA	NA	NA	NA
LNCV6_132205_PI430048170	0.00693434	0.220443	2.1652	1.8434	1.49803	A	A	A	3.99855	4.05572	4.07252	P	P	P	LNCV6_132205_PI430048170	mRNA	GCTGTTCTGCTCATATATGAATTTTTAATGCAGCAATGTTGACTTTGTTTCATACTGCCA	NM_002849	RefSeq	chr12	-	70638072	70920804	PTPRR	5801	protein tyrosine phosphatase, receptor type, R, transcript variant 1	GO:0005515|GO:0048471|GO:0005886|GO:0019901|GO:0001701|GO:0005615|GO:0035335|GO:0006470|GO:0005001|GO:0070373|GO:0016021|GO:0038128|GO:0004725|GO:0010633	.	NA	-	.	NA	NA	NA	NA	NA	NA	NA	NA	NA
LNCV6_30901_PI430048170	0.000931958	0.300736	4.91054	5.10431	4.613	P	P	P	6.78874	6.62741	6.43181	P	P	P	LNCV6_30901_PI430048170	mRNA	CCGCTGTCAAGCCGCATAACAGACCAATTTTTATTCCACGAGGAGGAGTACCTGGAAATT	NM_014960	RefSeq	chr17	+	68259181	68420859	ARSG	22901	arylsulfatase G, transcript variant 1	GO:0006665|GO:0006790|GO:0006687|GO:0005783|GO:0005788|GO:0004065|GO:0044281|GO:0044267|GO:0005764|GO:0005615|GO:0046872|GO:0043687	.	NA	-	.	NA	NA	NA	NA	NA	NA	NA	NA	NA
LNCV6_127971_PI430048170	0.000521956	2.56706	7.57575	7.81669	7.56467	P	P	P	6.35019	6.09826	6.42288	P	P	P	LNCV6_127971_PI430048170	mRNA	GCTGCATGTTCTGTGCTCTCCAGTTTGTCCCTTCCAATATTAATAAACTTCCCTTTTAAA	NM_148962	RefSeq	chr2	-	42762498	42764261	OXER1	165140	oxoeicosanoid (OXE) receptor 1	GO:0007186|GO:0005886|GO:0004930|GO:0030817|GO:0050646|GO:0016021|GO:0050647|GO:0050648	.	NA	-	.	NA	NA	NA	NA	NA	NA	NA	NA	NA
LNCV6_128488_PI430048170	0.00187885	0.488706	7.15021	7.51562	7.3254	P	P	P	8.45861	8.44251	8.19762	P	P	P	LNCV6_128488_PI430048170	mRNA	TGAATGTTTAATGCTCATGAAAATTGGGGGAGGGGGTTCTATTAACACAAAGCTTCTGAG	NM_015551	RefSeq	chr3	-	33150044	33219215	SUSD5	26032	sushi domain containing 5	GO:0005540|GO:0016021|GO:0007155	.	NA	-	.	NA	NA	NA	NA	NA	NA	NA	NA	NA
LNCV6_127911_PI430048170	3.11036e-05	33.1293	10.3252	10.1675	10.0036	P	P	P	5.21917	5.28186	4.82138	P	P	P	LNCV6_127911_PI430048170	mRNA	AGCTTATCTTTGCCTTCTCCAAACAAGAAGCAATAGTCTCCAAGTCAATATAAATTCTAC	NM_012338	RefSeq	chr7	-	120787319	120858123	TSPAN12	23554	tetraspanin 12	GO:0042813|GO:0016020|GO:0005887|GO:0045765|GO:0010842|GO:0016021|GO:0001525|GO:0007166	.	NA	-	.	NA	NA	NA	NA	NA	NA	NA	NA	NA
LNCV6_136939_PI430048170	0.0117561	6.34097	4.17742	4.48745	4.27924	P	P	P	1.94918	1.90731	0.880123	A	A	A	LNCV6_136939_PI430048170	mRNA	GGACTGTGGCTGGACATTCATCTAAATAAATTTGAATATACGACACTTTTCTCACTTGAA	NM_018043	RefSeq	chr11	+	70078301	70189546	ANO1	55107	anoctamin 1, calcium activated chloride channel, transcript variant 1	GO:0005515|GO:0006821|GO:0046982|GO:0005886|GO:0034707|GO:0007275|GO:0055085|GO:0042803|GO:0005737|GO:0016324|GO:0034220|GO:0042391|GO:0005229|GO:0005227|GO:0006812|GO:0009897|GO:0070062	.	NA	-	.	NA	NA	NA	NA	NA	NA	NA	NA	NA
LNCV6_140138_PI430048170	0.0023442	7.86269	3.43057	3.4672	2.85491	P	P	P	0.414737	0.27645	0.206283	A	A	A	LNCV6_140138_PI430048170	mRNA	CATGCACAAGGGTATTTCCAGGTCATTTATCATTGTGAACAGTGTTGCTTATGATAAAAA	NM_001135170	RefSeq	chr4	+	15339935	15446167	C1QTNF7	114905	C1q and tumor necrosis factor related protein 7, transcript variant 1	GO:0005581|GO:0051260|GO:0005615	.	NA	-	.	NA	NA	NA	NA	NA	NA	NA	NA	NA
LNCV6_133101_PI430048170	0.0275626	0.369997	8.98419	8.67154	7.86358	P	P	P	10.0101	9.63518	10.3149	P	P	P	LNCV6_133101_PI430048170	mRNA	GCTAAGGTGGGAGTGAACACTGGGGTGAATAAATTTTAAATCAATTCAAGTATCTCAAAA	NM_001166305	RefSeq	chr3	-	194587672	194633421	TMEM44	93109	transmembrane protein 44, transcript variant 3	GO:0016021	.	NA	-	.	NA	NA	NA	NA	NA	NA	NA	NA	NA
LNCV6_127675_PI430048170	0.000244516	7.51193	6.95554	7.01637	7.05446	P	P	P	4.10254	4.2357	3.94798	P	P	P	LNCV6_127675_PI430048170	mRNA	CCTAGAGTTCCTGTAGTGTCCTACATTAAAAATATAATGTCTCTCTCTATTCCTCAACAA	NM_013251	RefSeq	chr12	-	57009996	57016560	TAC3	6866	tachykinin 3, transcript variant 1	GO:0005515|GO:0007565|GO:0007218|GO:0005102|GO:0007217|GO:0005576|GO:0005615|GO:0070062	.	NA	-	.	NA	NA	NA	NA	NA	NA	NA	NA	NA
LNCV6_143340_PI430048170	0.000130731	7.83253	8.02557	7.63637	7.66067	P	P	P	4.94377	4.8207	4.67061	P	P	P	LNCV6_143340_PI430048170	mRNA	GTCTGCATGCTATTTTAATCTCACATTCTTTATCTGTCTTAAAGTGGAAATCCATTTGCC	NM_203349	RefSeq	chr15	-	48823736	48963444	SHC4	399694	SHC (Src homology 2 domain containing) family, member 4	GO:0005515|GO:0010468|GO:0030971|GO:0008284|GO:0030054|GO:0005886|GO:0019901|GO:0019904|GO:0006915|GO:0035556|GO:0048863|GO:0045211|GO:0007169	.	NA	-	.	NA	NA	NA	NA	NA	NA	NA	NA	NA
LNCV6_128841_PI430048170	0.00500042	0.492267	11.2704	11.2894	10.8867	P	P	P	12.3223	12.1647	12.0484	P	P	P	LNCV6_128841_PI430048170	mRNA	CTCAGACACTGAGTAGCATAAAAACCACATAGAACTGAACTGTAACTTAAATTCCAAACT	NM_003873	RefSeq	chr10	-	33177490	33334905	NRP1	8829	neuropilin 1, transcript variant 1	GO:0005515|GO:0071679|GO:0048842|GO:0021828|GO:0050731|GO:0048843|GO:0048844|GO:0048846|GO:0060301|GO:0005615|GO:0002116|GO:0043524|GO:0007413|GO:0017154|GO:0007411|GO:0043025|GO:0009887|GO:0070374|GO:0038085|GO:0009986|GO:0021649|GO:0016358|GO:0010595|GO	.	NA	-	.	NA	NA	NA	NA	NA	NA	NA	NA	NA
LNCV6_129847_PI430048170	0.00126448	6.21746	8.56983	8.41465	8.22905	P	P	P	5.7703	5.75981	5.79431	P	P	P	LNCV6_129847_PI430048170	mRNA	AAAGTGATCAACCACTGTTCCTTCTATGGGGCTCTTGCTCTAGTGTCTATGGTGAGAACA	NM_001304771	RefSeq	chr16	-	19858970	19885634	GPRC5B	51704	G protein-coupled receptor, class C, group 5, member B, transcript variant 2	GO:0001664|GO:0005886|GO:0009986|GO:0019901|GO:0004930|GO:0061098|GO:0090263|GO:0005730|GO:0005634|GO:0042593|GO:0030295|GO:0005615|GO:0043231|GO:0007186|GO:0045666|GO:0050729|GO:0010976|GO:0060907|GO:0045121|GO:0007626|GO:0016021|GO:0043123|GO:0030659|GO	.	NA	-	.	NA	NA	NA	NA	NA	NA	NA	NA	NA
LNCV6_127786_PI430048170	0.000271877	31.929	9.47543	9.50981	9.57531	P	P	P	4.71014	4.52805	4.30548	P	P	P	LNCV6_127786_PI430048170	mRNA	GCCTGGCTCTGTTATTTACCGTGTATCATATGTAAATATCGACAGAAACTTCAATAAACT	NM_031896	RefSeq	chr19	+	53912736	53943715	CACNG7	59284	calcium channel, voltage-dependent, gamma subunit 7	GO:0005245|GO:0032281|GO:2000311|GO:0070588|GO:0006816|GO:0005891	.	NA	-	.	NA	NA	NA	NA	NA	NA	NA	NA	NA
LNCV6_139918_PI430048170	0.000283266	0.390693	6.19658	6.03713	6.12145	P	P	P	7.56419	7.52402	7.32815	P	P	P	LNCV6_139918_PI430048170	mRNA	TCAACTTGGTGGAGAATAGAAGGCAAATGCTGGTGGCAGCGATCGTGTTTATCAGTTTTG	NM_182614	RefSeq	chr13	+	113759242	113811926	TMEM255B	348013	transmembrane protein 255B	GO:0016021	.	NA	-	.	NA	NA	NA	NA	NA	NA	NA	NA	NA
LNCV6_127177_PI430048170	0.000143547	0.267532	8.01758	7.89911	7.80066	P	P	P	9.82438	9.85374	9.7522	P	P	P	LNCV6_127177_PI430048170	mRNA	ATTCCTCCAGCTGTTGAAATGAAGTCTGCCAAATCTTGCTCTAACAAATAAAATGTTATC	NM_022159	RefSeq	chr1	-	78889763	79006810	ADGRL4	NA	adhesion G protein-coupled receptor L4	NA	.	NA	-	.	NA	NA	NA	NA	NA	NA	NA	NA	NA
LNCV6_127542_PI430048170	0.00299279	0.291753	11.0655	10.854	10.6595	P	P	P	12.606	12.6361	12.6956	P	P	P	LNCV6_127542_PI430048170	mRNA	GGCTGCTATGACTCTTTGGATGGGAGTCTGGCAAGAGGAAATTGGAAGATAAAATAAATA	NM_001301039	RefSeq	chr1	+	150272283	150280924	C1orf54	79630	chromosome 1 open reading frame 54, transcript variant 1	GO:0005576	.	NA	-	.	NA	NA	NA	NA	NA	NA	NA	NA	NA
LNCV6_127713_PI430048170	0.00110885	0.478449	8.90456	8.90581	8.75846	P	P	P	9.93806	9.93139	9.8946	P	P	P	LNCV6_127713_PI430048170	mRNA	TAAGCCATCCAGAGTAAAATCTGTTTAGATTATCTTGGAGTAAGGGGGAAAAAATCTGTA	NM_001127223	RefSeq	chr11	-	33703009	33722727	CD59	966	CD59 molecule, complement regulatory protein, transcript variant 5	GO:0005515|GO:0030449|GO:0043066|GO:0001848|GO:0005886|GO:0009986|GO:0005576|GO:0031982|GO:0031362|GO:0005615|GO:0042383|GO:0016020|GO:0007596|GO:0045087|GO:0043218|GO:0001971|GO:0042102|GO:0005925|GO:0001775|GO:0007166|GO:0070062	.	NA	-	.	NA	NA	NA	NA	NA	NA	NA	NA	NA
LNCV6_142917_PI430048170	0.000966839	0.36366	6.04617	6.07289	5.78062	P	P	P	7.62781	7.43273	7.20379	P	P	P	LNCV6_142917_PI430048170	mRNA	CTGCAGAAGCTAATACAAGGGACACTGGTCTTTTGACAAAATAAACTTGTGTAAATTTTG	NM_001080433	RefSeq	chr2	+	56184122	56386174	CCDC85A	114800	coiled-coil domain containing 85A	NA	.	NA	-	.	NA	NA	NA	NA	NA	NA	NA	NA	NA
LNCV6_132730_PI430048170	0.00187123	2.07307	9.16104	9.06857	8.98522	P	P	P	8.15162	8.05754	7.83806	P	P	P	LNCV6_132730_PI430048170	mRNA	CAACAGTCAGCCGGGGGAAGATAAAGGTACATTATAAAACACACATTAATGCATTTAATA	NM_153208	RefSeq	chr16	+	19716455	19858467	IQCK	124152	IQ motif containing K	NA	.	NA	-	.	NA	NA	NA	NA	NA	NA	NA	NA	NA
LNCV6_134034_PI430048170	0.000812768	0.0747947	0.309354	0.263863	0.231706	A	A	A	3.96234	4.23086	3.80276	P	P	P	LNCV6_134034_PI430048170	mRNA	GAATCCGTATTGAATTTGTGTGGTATGTCACTCAGAAAGAATCGTAATGGGTATATTGAT	NM_001193471	RefSeq	chr11	-	49146634	49208670	FOLH1	2346	folate hydrolase (prostate-specific membrane antigen) 1, transcript variant 3	GO:0005737|GO:0006760|GO:0016020|GO:0005887|GO:0006508|GO:0004180|GO:0008233|GO:0016805|GO:0046872|GO:0008237|GO:0070062	.	NA	-	.	NA	NA	NA	NA	NA	NA	NA	NA	NA
LNCV6_143809_PI430048170	0.000238018	0.34577	7.20955	7.2885	7.50456	P	P	P	8.8339	9.02816	8.73798	P	P	P	LNCV6_143809_PI430048170	mRNA	AACTTGTTACAATGACGATGATGATGATTCTTGGCGGTTACACAATCCTTCCTCCTGGGG	NM_001001479	RefSeq	chr22	+	30635805	30647875	SLC35E4	339665	solute carrier family 35, member E4	GO:0016021	.	NA	-	.	NA	NA	NA	NA	NA	NA	NA	NA	NA
LNCV6_139178_PI430048170	0.0263804	2.22623	6.63913	6.70549	6.55641	P	P	P	5.78019	5.51337	5.0573	P	P	P	LNCV6_139178_PI430048170	mRNA	GACCTTGGGGTTGTGTATTATATGAATGATGCTGTTTTTAAGTAAACCATTCAACAGCAA	NM_138396	RefSeq	chr12	+	57755097	57760410	MARCH9	NA	membrane-associated ring finger (C3HC4) 9	NA	.	NA	-	.	NA	NA	NA	NA	NA	NA	NA	NA	NA
LNCV6_137169_PI430048170	0.0136744	0.238152	1.84811	0.764282	1.10002	A	A	A	3.14273	3.49532	3.47787	P	P	P	LNCV6_137169_PI430048170	mRNA	CTTTTCTTTCTTACTGGGAAATTGAAGTAGCATGTCCTCTGAGTTGCATGTTTTAGATAA	NM_025145	RefSeq	chr10	-	104129887	104232362	CFAP43	80217	cilia and flagella associated protein 43	GO:0042995	.	NA	-	.	NA	NA	NA	NA	NA	NA	NA	NA	NA
LNCV6_140534_PI430048170	0.00207102	7.59392	3.54335	3.31373	3.50371	P	P	P	0.888937	0.414489	0.206283	A	A	A	LNCV6_140534_PI430048170	mRNA	GAGGATGTTAAAGACTTTGTTAAATGGTTATCCAATTGCTCTTTCACAGGTAGCCTATTA	NM_001287758	RefSeq	chrX	-	108155606	108438430	COL4A6	1288	collagen, type IV, alpha 6, transcript variant 3	GO:0022617|GO:0030198|GO:0030574|GO:0005587|GO:0005788|GO:0005576|GO:0007155|GO:0005201	.	NA	-	.	NA	NA	NA	NA	NA	NA	NA	NA	NA
LNCV6_131084_PI430048170	3.13095e-05	7.13315	10.7967	10.5934	10.5993	P	P	P	7.7208	8.0079	7.74871	P	P	P	LNCV6_131084_PI430048170	mRNA	AGTGGACTAAGCTTGCACTCAAGTCAGCGTAAACCTCTTTGCCTTTCTCTCTCTCTCTTT	NM_021979	RefSeq	chr14	+	64540467	64543236	HSPA2	3306	heat shock 70kDa protein 2	GO:0005515|GO:0006986|GO:0090084|GO:0051861|GO:0000795|GO:0009986|GO:0036128|GO:0007286|GO:0072562|GO:0005634|GO:0005524|GO:0005829|GO:0005739|GO:0042026|GO:0016020|GO:0070194|GO:0051082|GO:0031662|GO:0019899|GO:0001673|GO:0007141|GO:0070062|GO:0007140	.	NA	-	.	NA	NA	NA	NA	NA	NA	NA	NA	NA
LNCV6_138537_PI430048170	0.000480012	0.020542	0.259493	0.119122	0.1243	A	A	A	6.05125	5.7596	5.45003	P	P	P	LNCV6_138537_PI430048170	mRNA	TGTATCTGTTGCATCTTGTCAATGTTTGACTCATGGTCAGCATCCAATAGTTGTTAAATG	NM_001161429	RefSeq	chr5	-	36249001	36301909	RANBP3L	202151	RAN binding protein 3-like, transcript variant 1	GO:0046907	.	NA	-	.	NA	NA	NA	NA	NA	NA	NA	NA	NA
LNCV6_137336_PI430048170	2.80941e-05	33.109	11.9314	12.1533	12.2366	P	P	P	7.15682	7.22271	6.77146	P	P	P	LNCV6_137336_PI430048170	mRNA	CTCAGTTAAATCTTTGAAGAATATTTGTAGTTATCTTAGAAGATAGCATGGGAGGTGAGG	NM_003012	RefSeq	chr8	-	41261956	41309471	SFRP1	6422	secreted frizzled-related protein 1	GO:0005515|GO:0001657|GO:0014070|GO:0017147|GO:0030308|GO:0033689|GO:0030307|GO:0050732|GO:0050680|GO:0010564|GO:0005615|GO:0032855|GO:0042802|GO:0005109|GO:0005622|GO:0014034|GO:0006508|GO:0046676|GO:0050679|GO:0030336|GO:0009986|GO:0004930|GO:0001843|GO	.	NA	-	.	NA	NA	NA	NA	NA	NA	NA	NA	NA
LNCV6_128973_PI430048170	0.000198254	0.168854	5.33942	5.14479	4.84741	P	P	P	7.69805	7.89709	7.44096	P	P	P	LNCV6_128973_PI430048170	mRNA	GCAGCTGTATTGTGTAACAAGCTCATTTGTACAGTGTCTGTTCATGTAATAAAGAATTAC	NM_002275	RefSeq	chr17	-	41513744	41519018	KRT15	3866	keratin 15, type I	GO:0005882|GO:0005515|GO:0008544|GO:0097110|GO:0005200|GO:0005634|GO:0070062	.	NA	-	.	NA	NA	NA	NA	NA	NA	NA	NA	NA
LNCV6_130570_PI430048170	0.00212032	2.07685	9.15727	8.98148	8.7968	P	P	P	7.8427	8.058	7.88499	P	P	P	LNCV6_130570_PI430048170	mRNA	GTGTATGAGTTTCAGTAGAACTGTACCATCAACAATGTTTCCATAAATATGCAGAGTTCT	NM_022350	RefSeq	chr5	+	96875939	96919702	ERAP2	64167	endoplasmic reticulum aminopeptidase 2, transcript variant 1	GO:0002474|GO:0019885|GO:0004177|GO:0008217|GO:0006508|GO:0005789|GO:0005788|GO:0008270|GO:0016021|GO:0008237	.	NA	-	.	NA	NA	NA	NA	NA	NA	NA	NA	NA
LNCV6_142023_PI430048170	0.000237477	0.484026	5.10599	5.20623	5.20835	P	P	P	6.14843	6.1851	6.32392	P	P	P	LNCV6_142023_PI430048170	mRNA	CGCCCATTCTGTATGGTGAGCACATAATAGGTACTTATTTAGTGTTTGTCGAATTAATAA	NM_181657	RefSeq	chr14	+	24313106	24318036	LTB4R	1241	leukotriene B4 receptor, transcript variant 1	GO:0006955|GO:0006954|GO:0006936|GO:0007186|GO:0005886|GO:0000166|GO:0005887|GO:0007200|GO:0006928|GO:0001632|GO:0004974	.	NA	-	.	NA	NA	NA	NA	NA	NA	NA	NA	NA
LNCV6_135702_PI430048170	4.08744e-05	0.196047	7.3251	7.14202	7.11801	P	P	P	9.61442	9.54759	9.48124	P	P	P	LNCV6_135702_PI430048170	mRNA	TTTTCTCCTGCATTGTGACTCACGAAATTGACCGCTACACAGCAATTGCCTATTGGGTAC	NM_006120	RefSeq	chr6_GL000256v2_alt	-	4347848	4352360	HLA-DMA	3108	major histocompatibility complex, class II, DM alpha	GO:0048839|GO:0016064|GO:0009986|GO:0005771|GO:0002503|GO:0042613|GO:0005765|GO:0015031|GO:0045059|GO:0019886|GO:0016020|GO:0050778|GO:0031902|GO:0051085|GO:0023026|GO:0016021|GO:0045582|GO:0070062	.	NA	-	.	NA	NA	NA	NA	NA	NA	NA	NA	NA
LNCV6_138617_PI430048170	0.0120328	0.481845	6.58134	6.4794	6.13674	P	P	P	7.47501	7.5131	7.40394	P	P	P	LNCV6_138617_PI430048170	mRNA	GATCATGAGTGTTGCTGCAATACTTGAAGCTTCATGTATTTTCATTAATGTATACCATGC	NM_001290030	RefSeq	chr2	+	170770681	170798971	ERICH2	285141	glutamate-rich 2, transcript variant 1	NA	.	NA	-	.	NA	NA	NA	NA	NA	NA	NA	NA	NA
LNCV6_130663_PI430048170	0.00132323	5.97772	8.78538	8.44889	8.22227	P	P	P	6.05528	5.84227	5.86681	P	P	P	LNCV6_130663_PI430048170	mRNA	TTCAGTGTCCCATGTTCCGACTGCACCTTCTTTACAATAAAGACTGTAACTGAGCTGACT	NM_004209	RefSeq	chr16	+	1989944	1994275	SYNGR3	9143	synaptogyrin 3	GO:0047485|GO:0031594|GO:0030054|GO:0021762|GO:0032411|GO:0030672|GO:0016021|GO:0042169|GO:0008021	.	NA	-	.	NA	NA	NA	NA	NA	NA	NA	NA	NA
LNCV6_74134_PI430048170	0.00254443	2.903	4.34156	4.38736	4.22199	P	P	P	2.7919	2.97378	2.54595	P	P	P	LNCV6_74134_PI430048170	mRNA	GTGGCTCTTATTTCTGAATTCAAAGCTTGTGAAAAAATAAAGAAAATGAACTGCCCACTG	NM_001288661	RefSeq	chr4	-	5820763	5890226	CRMP1	1400	collapsin response mediator protein 1, transcript variant 3	GO:0005515|GO:0006139|GO:0005737|GO:0005815|GO:0007411|GO:0016812|GO:0043025|GO:0005819|GO:0030425|GO:0007399|GO:0006208|GO:0005829	.	NA	-	.	NA	NA	NA	NA	NA	NA	NA	NA	NA
LNCV6_128587_PI430048170	2.22911e-05	9.7755	8.55136	8.42093	8.1918	P	P	P	5.12815	5.25134	4.9206	P	P	P	LNCV6_128587_PI430048170	mRNA	CTCTATCAATAGTTTGACATTTTTCCCTCTTTTACATTGAGATCATACCCTAGGTACTGT	NM_138434	RefSeq	chr7	+	150329848	150332721	ZBED6CL	113763	ZBED6 C-terminal like	NA	.	NA	-	.	NA	NA	NA	NA	NA	NA	NA	NA	NA
LNCV6_132408_PI430048170	0.000451011	3.57487	6.98785	7.33558	7.39211	P	P	P	5.20491	5.60909	5.39172	P	P	P	LNCV6_132408_PI430048170	mRNA	GGAATGCCCAGCTAGTTAAAGAATGCAAAGGAAAATATTTTCACAAAGGGTTATCTGATA	NM_019046	RefSeq	chr10	-	5861725	5889897	ANKRD16	54522	ankyrin repeat domain 16, transcript variant 1	NA	.	NA	-	.	NA	NA	NA	NA	NA	NA	NA	NA	NA
LNCV6_142022_PI430048170	0.000654852	0.436876	5.96929	5.90225	5.81445	P	P	P	7.10171	7.06559	7.10663	P	P	P	LNCV6_142022_PI430048170	mRNA	AAACACTAGGACCCTGTTGTATCCTCAACTGCAAGTTTCTGGACTAGTCTCCCAACGTTT	NM_152637	RefSeq	chr12	+	55681545	55684610	METTL7B	196410	methyltransferase like 7B	GO:0005737|GO:0008757|GO:0032259	.	NA	-	.	NA	NA	NA	NA	NA	NA	NA	NA	NA
LNCV6_63844_PI430048170	0.00249818	0.492698	8.82907	8.64009	8.55289	P	P	P	9.69002	9.64826	9.75922	P	P	P	LNCV6_63844_PI430048170	mRNA	ATCCGGATAAAGCAAGAGCCTCTGGACTAAATGGACATATTTCTTATGCAAAAAGGAAAA	NM_001142730	RefSeq	chr18	-	26454910	26548536	KCTD1	284252	potassium channel tetramerization domain containing 1, transcript variant 3	GO:0003714|GO:0051260|GO:0005634|GO:0045892|GO:0006351|GO:0008134	.	NA	-	.	NA	NA	NA	NA	NA	NA	NA	NA	NA
LNCV6_145611_PI430048170	0.00119034	151.431	9.56209	9.25782	9.37506	P	P	P	1.48481	2.11487	2.65285	A	A	P	LNCV6_145611_PI430048170	mRNA	AAACCTACAGGACTTTCACTAAAGCTAGCCAGAGACAGCCATGAAAATGGACGTTTCACC	NM_001006630	RefSeq	chr7	+	136868651	137017024	CHRM2	1129	cholinergic receptor, muscarinic 2, transcript variant 1	GO:0030054|GO:0005886|GO:0008016|GO:0009615|GO:0007213|GO:0016907|GO:0007399|GO:0007186|GO:0005887|GO:0007187|GO:0051482|GO:0045211|GO:0007207|GO:0007188	.	NA	-	.	NA	NA	NA	NA	NA	NA	NA	NA	NA
LNCV6_129937_PI430048170	6.52845e-07	25.4753	9.12366	9.0275	8.93256	P	P	P	4.24421	4.37051	4.45452	P	P	P	LNCV6_129937_PI430048170	mRNA	ATTCTATGTCTGTAAAAACCAACAAAGGCATTGGACTTGTGTGAATGTACAGGGTTTTTT	NM_001008539	RefSeq	chr8	+	17497087	17570568	SLC7A2	6542	solute carrier family 7 (cationic amino acid transporter, y+ system), member 2, transcript variant 2	GO:0006520|GO:0005292|GO:0005886|GO:0043030|GO:0050727|GO:0006865|GO:0055085|GO:0002537|GO:0005289|GO:0006809|GO:0016020|GO:0042116|GO:0005887|GO:0006810|GO:0015174|GO:0006811	.	NA	-	.	NA	NA	NA	NA	NA	NA	NA	NA	NA
LNCV6_93364_PI430048170	0.00366561	0.0599462	0.203247	1.01347	0.176531	A	A	A	4.64344	4.59855	4.49278	P	P	P	LNCV6_93364_PI430048170	mRNA	ATAACCTTGGTCCTTTGGAACTGATTCTTAATACTCCTAGCCATCATAGGGTTCATCATG	NM_001004320	RefSeq	chr7	-	15200317	15562015	AGMO	392636	alkylglycerol monooxygenase	GO:0005506|GO:0050479|GO:0005783|GO:0005789|GO:0046485|GO:0006633|GO:0016021|GO:0055114|GO:0006643	.	NA	-	.	NA	NA	NA	NA	NA	NA	NA	NA	NA
LNCV6_145517_PI430048170	0.000165423	0.203398	6.11624	5.88262	5.97584	P	P	P	8.12814	8.23803	8.48724	P	P	P	LNCV6_145517_PI430048170	mRNA	GATGCCTTACTCTGACGGGAGCATCTGTATTTTTATGTTAAAAGCCCACAAAATAAAAAT	NM_001692	RefSeq	chr2	+	70935867	70965431	ATP6V1B1	525	ATPase, H+ transporting, lysosomal 56/58kDa, V1 subunit B1	GO:0008286|GO:0015078|GO:0007605|GO:0045851|GO:0033180|GO:0032403|GO:0006885|GO:0055074|GO:0005829|GO:0006879|GO:0016323|GO:0033572|GO:0005737|GO:0016324|GO:0016820|GO:0090382|GO:0070062|GO:0007588|GO:0042472|GO:0046034|GO:0051701|GO:0055085|GO:0005524|GO	.	NA	-	.	NA	NA	NA	NA	NA	NA	NA	NA	NA
LNCV6_144502_PI430048170	1.70599e-05	6.07103	11.6176	11.4961	11.3997	P	P	P	8.9767	8.90125	8.83445	P	P	P	LNCV6_144502_PI430048170	mRNA	GGGACCGAGAGATCAGATAGTTGCTGTTTTGTAAAATGTAATGTATATGTGGTTTTTAGT	NM_177543	RefSeq	chr19	-	281039	291169	PPAP2C	8612	phosphatidic acid phosphatase type 2C, transcript variant 3	GO:0006665|GO:0016020|GO:0005886|GO:0030148|GO:0016311|GO:0004721|GO:0044281|GO:0016021|GO:0008195	.	NA	-	.	NA	NA	NA	NA	NA	NA	NA	NA	NA
LNCV6_133737_PI430048170	0.000825759	0.46213	12.7229	12.6207	12.7024	P	P	P	13.7594	13.6991	13.9211	P	P	P	LNCV6_133737_PI430048170	mRNA	TCATTGTTACTGCCTTGTGAGATAAAAACTGATTAAACCTTTGTGGCTGTGGTTGGCTGA	NM_002862	RefSeq	chr20	+	25248069	25298012	PYGB	5834	phosphorylase, glycogen; brain	GO:0005737|GO:0016020|GO:0005975|GO:0030170|GO:0009405|GO:0008184|GO:0006006|GO:0044281|GO:0005980|GO:0070062	.	NA	-	.	NA	NA	NA	NA	NA	NA	NA	NA	NA
LNCV6_137125_PI430048170	0.000120732	3.77479	7.16886	7.05767	7.06101	P	P	P	5.30482	5.15302	5.07366	P	P	P	LNCV6_137125_PI430048170	mRNA	CCTCCGGTATACCTTTATCCCTTTGAAAGGGTGCTTGTACAATTTGATATATTTTATTGA	NM_002449	RefSeq	chr5	+	174724571	174730899	MSX2	4488	msh homeobox 2	GO:0005515|GO:0003416|GO:0008285|GO:0035313|GO:0044212|GO:0006366|GO:0045599|GO:0000982|GO:0032792|GO:0005634|GO:2000678|GO:0009952|GO:0045617|GO:0030513|GO:0090427|GO:0002063|GO:0071392|GO:0061312|GO:0003712|GO:0005667|GO:0043066|GO:0003198|GO:0023019|GO	.	NA	-	.	NA	NA	NA	NA	NA	NA	NA	NA	NA
LNCV6_142227_PI430048170	0.000183784	0.0780714	7.94407	7.86525	7.61492	P	P	P	11.5489	11.5055	11.4244	P	P	P	LNCV6_142227_PI430048170	mRNA	CCCACAGATTCTTGATTTGTAGTTGTTTGGCAGGATTTTTCTTTGTGATATAATCACTTC	NM_001003679	RefSeq	chr1	+	65420651	65635428	LEPR	3953	leptin receptor, transcript variant 3	GO:0045721|GO:0005515|GO:0004896|GO:0005886|GO:0051346|GO:0019221|GO:0005576|GO:0007275|GO:0042802|GO:0043235|GO:0006112|GO:0016021|GO:0007166|GO:0004888|GO:0008203	.	NA	-	.	NA	NA	NA	NA	NA	NA	NA	NA	NA
LNCV6_143571_PI430048170	0.014332	26.7069	7.32335	7.24838	7.12798	P	P	P	1.0661	3.05166	2.70974	A	P	P	LNCV6_143571_PI430048170	mRNA	ACTGGGCTTGGCCTTGAGAGAAAGCCTTCTGTTTAATAAAGTACATTTTCTTCAGTAATC	NM_005330	RefSeq	chr11	-	5268349	5270143	HBE1	3046	hemoglobin, epsilon 1	GO:0019825|GO:0005833|GO:0005506|GO:0007596|GO:0005344|GO:0072562|GO:0000122|GO:0051291|GO:0031721|GO:0020037|GO:0015671|GO:0005829	.	NA	-	.	NA	NA	NA	NA	NA	NA	NA	NA	NA
LNCV6_138316_PI430048170	0.00106792	0.190458	7.01114	7.39006	7.22501	P	P	P	9.57126	9.67022	9.58493	P	P	P	LNCV6_138316_PI430048170	mRNA	CTCCCTTCACCAGCCGAACCAATGTCAAAATTAATAAAGAAATGGACTAATGGCAAAAAA	NM_001142446	RefSeq	chr8	-	41653224	41896762	ANK1	286	ankyrin 1, erythrocytic, transcript variant 9	GO:0005515|GO:0030018|GO:0005886|GO:0072661|GO:0005634|GO:0006887|GO:0055072|GO:0005829|GO:0016323|GO:0007411|GO:0048821|GO:0045211|GO:0007010|GO:0051117|GO:0030673|GO:0005856|GO:0008093|GO:0030507|GO:0014731|GO:0045199|GO:0031430|GO:0015672|GO:0042383|GO	.	NA	-	.	NA	NA	NA	NA	NA	NA	NA	NA	NA
LNCV6_134089_PI430048170	2.2806e-05	20.2632	8.48714	8.30812	8.26918	P	P	P	3.99637	3.82841	4.20239	P	P	P	LNCV6_134089_PI430048170	mRNA	AATCCCAGTGAGTTCTGCATTTGTATCTTGCAAGTTTGTATAAACCCAATACAGGAAATA	NM_014935	RefSeq	chr1	-	204218850	204359929	PLEKHA6	22874	pleckstrin homology domain containing, family A member 6	NA	.	NA	-	.	NA	NA	NA	NA	NA	NA	NA	NA	NA
LNCV6_137766_PI430048170	0.0110602	2.25949	8.21571	7.99996	7.95371	P	P	P	7.08006	7.00236	6.50903	P	P	P	LNCV6_137766_PI430048170	mRNA	ATGTCCTTCCATTACATCTCAATGGGAGACTGCATAGGATGGCTTGAGGACTTCTTGATG	NM_130900	RefSeq	chr6	-	150020129	150025532	RAET1L	NA	retinoic acid early transcript 1L	NA	.	NA	-	.	NA	NA	NA	NA	NA	NA	NA	NA	NA
LNCV6_129463_PI430048170	0.000888494	4.29716	7.01024	7.01284	6.9756	P	P	P	5.03517	4.80356	4.83917	P	P	P	LNCV6_129463_PI430048170	mRNA	AATTGTTTCAGATCATCTCATGCCTCAGGCTTTGGCAGGTATCCTGCCCTCCATCTTATT	NM_001002814	RefSeq	chr8	-	37858946	37899497	RAB11FIP1	80223	RAB11 family interacting protein 1 (class I), transcript variant 3	GO:0045055|GO:0017137|GO:0005737|GO:0030670|GO:0055037|GO:0015031|GO:0043231	.	NA	-	.	NA	NA	NA	NA	NA	NA	NA	NA	NA
LNCV6_142290_PI430048170	0.00127932	2.69809	12.2088	11.8951	11.9507	P	P	P	10.5733	10.5264	10.6749	P	P	P	LNCV6_142290_PI430048170	mRNA	TGGGGAACCCTAAACCCAACTCTGTTGATGTGAAAAATGCAGTGAAAAATATTGACGAAA	NM_014849	RefSeq	chr1	-	149903319	149917882	SV2A	9900	synaptic vesicle glycoprotein 2A, transcript variant 1	GO:0048786|GO:0043005|GO:0031594|GO:0005886|GO:0019901|GO:0005783|GO:0022857|GO:0006874|GO:0055085|GO:0008021|GO:0005737|GO:0005911|GO:0006836|GO:0009405|GO:0004872|GO:0030672|GO:0016021	.	NA	-	.	NA	NA	NA	NA	NA	NA	NA	NA	NA
LNCV6_130360_PI430048170	0.000214455	0.270881	11.0657	10.7646	10.7245	P	P	P	12.6038	12.7045	12.9073	P	P	P	LNCV6_130360_PI430048170	mRNA	AGGTGGGCATTTTTGGGCTACCTGGTTCGTTTTTATAAGATTTTGCTGGGTTGGTTTTTT	NM_016270	RefSeq	chr19	+	16324839	16327528	KLF2	10365	Kruppel-like factor 2	GO:0051247|GO:0005515|GO:0071499|GO:0070301|GO:0003700|GO:0032715|GO:0005634|GO:0071409|GO:0001701|GO:0046872|GO:0006351|GO:0060509|GO:0043565|GO:0000902|GO:0043249|GO:0035264|GO:0045944|GO:0071356|GO:0071347|GO:0040029|GO:0036003	.	NA	-	.	NA	NA	NA	NA	NA	NA	NA	NA	NA
LNCV6_127015_PI430048170	0.0386477	2.36923	3.58346	3.57793	3.42627	P	P	P	1.78679	2.73856	2.17404	A	P	A	LNCV6_127015_PI430048170	mRNA	AGAAGACAGACTGGTTCATTGAATGCCGCCTTATTTATTTCTGGTGAGGATGCATGCGTG	NM_001651	RefSeq	chr12	+	49961495	49965682	AQP5	362	aquaporin 5	GO:0005515|GO:0007588|GO:0005886|GO:0005783|GO:0009992|GO:0048593|GO:0030157|GO:0015670|GO:0055085|GO:0005902|GO:0016324|GO:0034220|GO:0009925|GO:0005887|GO:0015250|GO:0015793|GO:0042476|GO:0006833|GO:0015254|GO:0070062|GO:0046541	.	NA	-	.	NA	NA	NA	NA	NA	NA	NA	NA	NA
LNCV6_129623_PI430048170	2.06068e-05	0.0275469	2.64039	2.31532	2.14954	P	P	A	7.70019	7.61224	7.36155	P	P	P	LNCV6_129623_PI430048170	mRNA	CAGCGAGCTTCTTATAAATGTGGTGATTTTTACCAAGGAAACGATTGACTTAATGCTTAA	NM_019605	RefSeq	chr1	+	210232849	210243095	SERTAD4	56256	SERTA domain containing 4	GO:0005634	.	NA	-	.	NA	NA	NA	NA	NA	NA	NA	NA	NA
LNCV6_144508_PI430048170	1.64122e-05	2.31138	11.2181	11.1549	11.2767	P	P	P	10.0742	9.95848	9.99083	P	P	P	LNCV6_144508_PI430048170	mRNA	ACAGAGTTCAGCAATTTTGATTAAATTAAGACTTGGGGGTGAAACTTTCCAGTTTACTGA	NM_004184	RefSeq	chr14	-	100333787	100375590	WARS	7453	tryptophanyl-tRNA synthetase, transcript variant 1	GO:0005515|GO:0010467|GO:0008285|GO:0045765|GO:0005634|GO:0001525|GO:0005524|GO:0006412|GO:0005829|GO:0006418|GO:0006436|GO:0004830|GO:0005737|GO:0070062	.	NA	-	.	NA	NA	NA	NA	NA	NA	NA	NA	NA
LNCV6_134999_PI430048170	0.00362724	2.43088	7.69298	7.45884	7.34457	P	P	P	6.21331	6.17595	6.28278	P	P	P	LNCV6_134999_PI430048170	mRNA	CCTGAGAGCAGTATGAGGCCTGCAAGAAAGTGATCATATAATTGTATCTTCACTTTCTTT	NM_006735	RefSeq	chr7	-	27100353	27102775	HOXA2	3199	homeobox A2	GO:0003700|GO:0007379|GO:0071300|GO:0001709|GO:0021658|GO:0021568|GO:0048703|GO:0000122|GO:0009953|GO:0009952|GO:0006351|GO:0043565|GO:0008045|GO:0045668|GO:0045665|GO:0002076|GO:0045944|GO:0035284|GO:0042474|GO:0005654	.	NA	-	.	NA	NA	NA	NA	NA	NA	NA	NA	NA
LNCV6_143531_PI430048170	0.000771888	2.54714	3.39061	3.74409	3.48342	P	P	P	2.2105	2.05024	2.3216	A	A	A	LNCV6_143531_PI430048170	mRNA	ATGTCTCTCTGTATTGACATTAAGTATTCACTTTTAGAGTAAAATCCATCCCTGGGACAT	NM_024870	RefSeq	chr8	+	67952367	68231662	PREX2	80243	phosphatidylinositol-3,4,5-trisphosphate-dependent Rac exchange factor 2, transcript variant 1	GO:0048813|GO:0008344|GO:0007186|GO:0005886|GO:0032855|GO:0030675|GO:0014065|GO:0030676	.	NA	-	.	NA	NA	NA	NA	NA	NA	NA	NA	NA
LNCV6_107278_PI430048170	0.000760674	3.20684	5.50681	5.13306	5.19686	P	P	P	3.55763	3.73717	3.51716	P	P	P	LNCV6_107278_PI430048170	mRNA	TCAGCCATGTCGACTGGTTTTCTGTCCACAAGGAGAAGCGGACGCTCATCTTCCGTGTGC	NM_006500	RefSeq	chr11	-	119308523	119317130	MCAM	4162	melanoma cell adhesion molecule	GO:0061042|GO:0030335|GO:0005886|GO:0003094|GO:0005634|GO:0016021|GO:0001525|GO:0007155|GO:0009653|GO:0005925|GO:0005615|GO:0009897	.	NA	-	.	NA	NA	NA	NA	NA	NA	NA	NA	NA
LNCV6_130841_PI430048170	7.75616e-05	2.76142	8.59997	8.42375	8.39512	P	P	P	6.89047	7.04669	7.08672	P	P	P	LNCV6_130841_PI430048170	mRNA	CTGCCAAAACTGTGGCATTTTCATTACAGGAGAGTTTACTATGCTAAAAGCAAAAAACAA	NM_012419	RefSeq	chr6	-	153010896	153131254	RGS17	26575	regulator of G-protein signaling 17	GO:0043547|GO:0005737|GO:0005886|GO:0038032|GO:0005634|GO:0005096	.	NA	-	.	NA	NA	NA	NA	NA	NA	NA	NA	NA
LNCV6_144648_PI430048170	0.00051586	4.03812	14.3639	14.2	14.0037	P	P	P	12.1563	12.1089	12.2784	P	P	P	LNCV6_144648_PI430048170	mRNA	ACACCCTGCTTTGTATTCTGGGCTAAGATTCATTAAAAACTAGCTGCTCTTAACTTACAA	NM_000690	RefSeq	chr12	+	111766886	111809985	ALDH2	217	aldehyde dehydrogenase 2 family (mitochondrial), transcript variant 1	GO:0006805|GO:0005975|GO:0006066|GO:0006069|GO:0006068|GO:0004029|GO:0007268|GO:0009055|GO:0044281|GO:0005759|GO:0042136|GO:0004030|GO:0070062	.	NA	-	.	NA	NA	NA	NA	NA	NA	NA	NA	NA
LNCV6_129098_PI430048170	0.00849098	0.0458994	1.35161	1.53448	0.182223	A	A	A	5.59585	5.58578	5.55585	P	P	P	LNCV6_129098_PI430048170	mRNA	CACAGAGCAAGGCGGGCAGGGAACGGTTATTTTTCTAAATAAATGCTTTAAAAGAAAAAA	NM_006399	RefSeq	chr14	+	75522440	75546991	BATF	10538	basic leucine zipper transcription factor, ATF-like	GO:0005515|GO:0002320|GO:0003700|GO:0006357|GO:0030330|GO:0072539|GO:0045190|GO:0042832|GO:0005634|GO:0060218|GO:0001816|GO:0072540|GO:0006351|GO:0006974|GO:0043565|GO:0005737|GO:0045064|GO:0043011	.	NA	-	.	NA	NA	NA	NA	NA	NA	NA	NA	NA
LNCV6_144922_PI430048170	4.10015e-05	5.59938	6.26329	6.47082	6.19996	P	P	P	3.9199	3.83965	3.7263	P	P	P	LNCV6_144922_PI430048170	mRNA	GTTGCTTAACTCCTTTACACCATTAGTTATCTGTGAGACCATCTATTCCACACTCTTCAT	NM_144711	RefSeq	chr2	+	169733845	169751886	KLHL23	151230	kelch-like family member 23	GO:0005515	.	NA	-	.	NA	NA	NA	NA	NA	NA	NA	NA	NA
LNCV6_95407_PI430048170	0.000436213	2.02401	9.64051	9.43525	9.50883	P	P	P	8.4947	8.46091	8.58214	P	P	P	LNCV6_95407_PI430048170	mRNA	GAAGTACCAGCACAATTTGAGCATTCCCATTAACAAAGGTGTTCACAGTTGAGAAACTCT	NM_054110	RefSeq	chr3	+	16174676	16229746	GALNT15	117248	polypeptide N-acetylgalactosaminyltransferase 15	GO:0030133|GO:0004653|GO:0006493|GO:0000139|GO:0030246|GO:0016266|GO:0016021|GO:0044267|GO:0046872|GO:0043687	.	NA	-	.	NA	NA	NA	NA	NA	NA	NA	NA	NA
LNCV6_32111_PI430048170	0.00351296	2.29431	8.99681	9.01285	9.04087	P	P	P	7.93228	7.84648	7.66521	P	P	P	LNCV6_32111_PI430048170	mRNA	AAGGACTTCACAAAAACCTGTGGATAATGGAAGGGATGTTACGGTACAAACGTATATTTA	NM_004230	RefSeq	chr19	-	10221432	10231272	S1PR2	9294	sphingosine-1-phosphate receptor 2	GO:0000187|GO:0008284|GO:0090394|GO:0005178|GO:0001664|GO:0007186|GO:0005886|GO:0004930|GO:0003376|GO:0016021|GO:0038036|GO:0008289	.	NA	-	.	NA	NA	NA	NA	NA	NA	NA	NA	NA
LNCV6_131083_PI430048170	0.02977	0.440362	1.51292	1.81414	2.39363	A	A	A	3.4862	2.63075	3.16986	P	P	P	LNCV6_131083_PI430048170	mRNA	AAATTTGTTTTCTTTATGCTTCAGGGTAGAGGGATTTCCCTTGAGTATAGGTCAGCAAAC	NM_001168374	RefSeq	chr6	-	24544103	24646155	KIAA0319	9856	KIAA0319, transcript variant 3	GO:0005515|GO:0005886|GO:0031901|GO:0016021|GO:0001764|GO:2000171|GO:0005769	.	NA	-	.	NA	NA	NA	NA	NA	NA	NA	NA	NA
LNCV6_127428_PI430048170	3.75553e-07	0.0764119	0.299401	0.186234	0.164184	A	A	A	3.98248	3.94081	3.85759	P	P	P	LNCV6_127428_PI430048170	mRNA	CTTCTCAAATGGATGATTTCTAAATACGCGTCAGATGAAGTGATTCTAACTTTCTCTGTA	NM_020869	RefSeq	chr11	-	30863602	30992686	DCDC5	100506627	doublecortin domain containing 5	GO:0035556	.	NA	-	.	NA	NA	NA	NA	NA	NA	NA	NA	NA
LNCV6_137100_PI430048170	0.000963995	0.416744	9.3296	9.50903	9.39813	P	P	P	10.6541	10.6762	10.7001	P	P	P	LNCV6_137100_PI430048170	mRNA	TAACAGTTTGTGTAACATTTATTATGATTTTACATAAATGAGCATCTACCATTCCAAAGC	NM_014272	RefSeq	chr15	-	78759202	78811431	ADAMTS7	11173	ADAM metallopeptidase with thrombospondin type 1 motif, 7	GO:0071773|GO:0005515|GO:0009986|GO:0005578|GO:0036066|GO:0006493|GO:0051603|GO:0071356|GO:0071347|GO:0005788|GO:0008270|GO:0032331|GO:0004222|GO:0044267|GO:0008237|GO:0043687	.	NA	-	.	NA	NA	NA	NA	NA	NA	NA	NA	NA
LNCV6_136771_PI430048170	0.00538291	0.175013	0.178874	1.18016	0.0987507	A	A	A	3.51377	2.51944	3.06671	P	P	P	LNCV6_136771_PI430048170	mRNA	CTGAGAATCCTGCAGCTTGGTTTAATGAGTGTGTTCATGAAATAAATAATGGAGGAATTG	NM_024080	RefSeq	chr2	+	233917397	234019522	TRPM8	79054	transient receptor potential cation channel, subfamily M, member 8	GO:0005262|GO:0005886|GO:0009409|GO:0006874|GO:0055085|GO:0042803|GO:0070207|GO:0034220|GO:0051289|GO:0070588|GO:0005789|GO:0050955|GO:0016048|GO:0045121|GO:0016021|GO:0009897	.	NA	-	.	NA	NA	NA	NA	NA	NA	NA	NA	NA
LNCV6_140296_PI430048170	0.00020062	7.04937	12.54	12.9038	13.0748	P	P	P	10.2295	10.0694	9.78264	P	P	P	LNCV6_140296_PI430048170	mRNA	CCCCCTTTCCCCACTTCCTTGACTGCTGTGATGTGAATTAAAGATAAATACGTGATACTG	NM_004947	RefSeq	chr3	+	50675240	51384198	DOCK3	1795	dedicator of cytokinesis 3	GO:0043547|GO:0005515|GO:0005085|GO:0017124|GO:0005737|GO:0007264	.	NA	-	.	NA	NA	NA	NA	NA	NA	NA	NA	NA
LNCV6_130354_PI430048170	0.000809495	3.41483	8.51685	8.43575	8.23305	P	P	P	6.63148	6.6783	6.57311	P	P	P	LNCV6_130354_PI430048170	mRNA	TGATGCTGTTAACCAAAGGGCAGAATAAATAAGCAAAATGCCAAAAGGGGTCTTAATTGA	NM_001730	RefSeq	chr13	+	73058791	73077542	KLF5	688	Kruppel-like factor 5 (intestinal), transcript variant 1	GO:0060576|GO:0005515|GO:0008284|GO:0005794|GO:0005886|GO:0006366|GO:0030033|GO:0032534|GO:0000122|GO:0001525|GO:0035914|GO:0000978|GO:0046872|GO:0043231|GO:0071407|GO:0001077|GO:0005737|GO:0045944|GO:0045600|GO:0005654	.	NA	-	.	NA	NA	NA	NA	NA	NA	NA	NA	NA
LNCV6_134998_PI430048170	0.00262202	3.91457	5.89047	6.18453	6.23311	P	P	P	4.13025	4.16797	4.12622	P	P	P	LNCV6_134998_PI430048170	mRNA	GGGAGGGGGAGAGAGCAAGGAGATCGGTATCTTTGTAATAAAACTGCAATTTTATAAATT	NM_153631	RefSeq	chr7	-	27106189	27127020	HOXA3	3200	homeobox A3, transcript variant 2	GO:0006355|GO:0008284|GO:0003700|GO:0051216|GO:0048704|GO:0048538|GO:0001525|GO:0030878|GO:0009952|GO:0006351|GO:0048645|GO:0043565|GO:0060017|GO:0021615|GO:0001974|GO:0071837|GO:0005654|GO:0010159	.	NA	-	.	NA	NA	NA	NA	NA	NA	NA	NA	NA
LNCV6_132290_PI430048170	0.00229819	0.318561	6.64221	6.4752	6.04959	P	P	P	8.31339	8.04679	7.76957	P	P	P	LNCV6_132290_PI430048170	mRNA	ATGTATGGTGTAAAACACACAAACACACACAAAAAAGCACAAGCCCGCTGCATGACCCGT	NM_001005463	RefSeq	chr10	-	129835231	129963827	EBF3	253738	early B-cell factor 3	GO:0046983|GO:0007275|GO:0005634|GO:0045893|GO:0003677|GO:0046872|GO:0006351	.	NA	-	.	NA	NA	NA	NA	NA	NA	NA	NA	NA
LNCV6_59498_PI430048170	0.000381845	0.152694	7.70337	7.52307	7.26381	P	P	P	10.1029	10.2297	10.317	P	P	P	LNCV6_59498_PI430048170	mRNA	GGGGTCTTCTTACTTCTTCCCTTTGAGGACAAAGTTTCTCTCGAATAAAGAGACTGAAGC	NM_001142343	RefSeq	chr12	-	108288043	108339317	CMKLR1	1240	chemokine-like receptor 1, transcript variant 1	GO:0050848|GO:0005515|GO:0070098|GO:0005886|GO:0004930|GO:0032088|GO:0001501|GO:0006955|GO:0006935|GO:0007186|GO:0032695|GO:0005887|GO:0045600|GO:0004950|GO:0010759|GO:0004872|GO:0016021	.	NA	-	.	NA	NA	NA	NA	NA	NA	NA	NA	NA
LNCV6_76946_PI430048170	0.0359699	0.297189	3.51381	2.33723	2.55395	P	A	A	4.65628	4.67506	4.61093	P	P	P	LNCV6_76946_PI430048170	mRNA	ATTTGTACTGATCCTCTGGTGTCCAAAATTTCCTTTACTGGTTCAACAACTACAGGAAAG	NM_170740	RefSeq	chr6	+	24494968	24537207	ALDH5A1	7915	aldehyde dehydrogenase 5 family, member A1, transcript variant 1	GO:0006678|GO:0009013|GO:0004777|GO:0006536|GO:0046459|GO:0004029|GO:0007268|GO:0006749|GO:0006083|GO:0009791|GO:0007417|GO:0042803|GO:0007269|GO:0006681|GO:0022904|GO:0005739|GO:0051289|GO:0006105|GO:0005759|GO:0009450|GO:0006006|GO:0006650|GO:0042135|GO	.	NA	-	.	NA	NA	NA	NA	NA	NA	NA	NA	NA
LNCV6_77518_PI430048170	0.0010493	0.330544	2.92997	2.51725	2.51246	P	P	A	4.49126	4.1898	4.07869	P	P	P	LNCV6_77518_PI430048170	mRNA	TGAGGTCAAGGTGAACTTAACTAGAGATGTGGATGAAACCTAATTACAGACAACGTTTTA	NM_001031743	RefSeq	chr6	+	87407971	87464473	C6orf165	154313	chromosome 6 open reading frame 165	NA	.	NA	-	.	NA	NA	NA	NA	NA	NA	NA	NA	NA
LNCV6_136149_PI430048170	0.000309179	0.460225	4.36401	4.47167	4.44882	P	P	P	5.45111	5.64839	5.53919	P	P	P	LNCV6_136149_PI430048170	mRNA	GGTTATAGCTATACCTTCAGGTCTTTTGTTACTTAGGCAAGGAAAACCACATGTCTGACC	NM_024560	RefSeq	chr12	+	81078029	81255803	ACSS3	79611	acyl-CoA synthetase short-chain family member 3	GO:0005739|GO:0008152|GO:0003987|GO:0005524	.	NA	-	.	NA	NA	NA	NA	NA	NA	NA	NA	NA
LNCV6_137118_PI430048170	0.000204881	7.44363	8.80229	8.72415	8.6085	P	P	P	5.93973	5.90315	5.5849	P	P	P	LNCV6_137118_PI430048170	mRNA	CCTTAACTGTTAGTTATGCCTGCATTCATATTTGCACAGGAAAAATAAAGACCTGGATTT	NM_001298	RefSeq	chr2	+	98346154	98398601	CNGA3	1261	cyclic nucleotide gated channel alpha 3, transcript variant 1	GO:0005223|GO:0046549|GO:0007603|GO:0042622|GO:0005222|GO:0031960|GO:0008022|GO:0051591|GO:0030425|GO:0007165|GO:0005737|GO:0030553|GO:0005887|GO:0005249|GO:0042391|GO:0032026|GO:0006810|GO:0043204|GO:0007601|GO:0071805|GO:0006812|GO:0015276	.	NA	-	.	NA	NA	NA	NA	NA	NA	NA	NA	NA
LNCV6_140729_PI430048170	5.32432e-05	3.35194	6.02577	5.95392	5.81816	P	P	P	4.10644	4.32567	4.12812	P	P	P	LNCV6_140729_PI430048170	mRNA	GTATTAAATAGCCATTCATTCTGGAACTCAAGGACAGGACTGTAATAAAATGGAATGGAA	NM_001080414	RefSeq	chr14	-	91271322	91417844	CCDC88C	440193	coiled-coil domain containing 88C	GO:0031648|GO:0005737|GO:0051260|GO:0001932|GO:0043621|GO:0030165|GO:0016055|GO:0031098	.	NA	-	.	NA	NA	NA	NA	NA	NA	NA	NA	NA
LNCV6_135835_PI430048170	0.00359973	4.99732	5.16279	5.09687	5.035	P	P	P	3.0802	2.67128	2.52354	P	P	P	LNCV6_135835_PI430048170	mRNA	CGTCATAGGCTTCTGCACGTTGGATCAACTAATGTTGTTTACAATATAGATGACATTTTA	NM_003914	RefSeq	chr13	+	36432271	36442882	CCNA1	8900	cyclin A1, transcript variant 1	GO:0005515|GO:0019901|GO:0010389|GO:0000079|GO:0007283|GO:0005829|GO:0000082|GO:0007067|GO:0000083|GO:0000086|GO:0015630|GO:0005654|GO:0000278|GO:0007141|GO:0051301	.	NA	-	.	NA	NA	NA	NA	NA	NA	NA	NA	NA
LNCV6_134277_PI430048170	2.83695e-05	7.09769	9.75922	9.57645	9.44396	P	P	P	6.8914	6.76388	6.6496	P	P	P	LNCV6_134277_PI430048170	mRNA	GAAAGAGTGTTATCATATTGGTGCTGAGTGCTATGTGTGCTTATACAATTTGTTCTTGTA	NM_000793	RefSeq	chr14	-	80197524	80231054	DIO2	1734	deiodinase, iodothyronine, type II, transcript variant 2	GO:0005886|GO:0004800|GO:0044281|GO:0034641|GO:0042403|GO:0008430|GO:0016020|GO:0001514|GO:0042446|GO:0006590|GO:0016021|GO:0031625|GO:0055114	.	NA	-	.	NA	NA	NA	NA	NA	NA	NA	NA	NA
LNCV6_129085_PI430048170	0.00016772	0.28686	7.13711	6.96019	6.82036	P	P	P	8.83471	8.85128	8.64496	P	P	P	LNCV6_129085_PI430048170	mRNA	GATGCCTGTTATTTCACATCACTGTCTTTTTGTGTATCATAGTCTGCACCTTACAAATAT	NM_000800	RefSeq	chr5	-	142592177	142686495	FGF1	2246	fibroblast growth factor 1 (acidic), transcript variant 1	GO:0005515|GO:0008286|GO:0008284|GO:0030324|GO:0001759|GO:0005615|GO:0009653|GO:0005829|GO:0034605|GO:0007173|GO:0043406|GO:0045944|GO:0051781|GO:0070374|GO:0005938|GO:0008201|GO:0050679|GO:0048011|GO:0030335|GO:0060681|GO:0048015|GO:0005730|GO:0005578|GO	.	NA	-	.	NA	NA	NA	NA	NA	NA	NA	NA	NA
LNCV6_141793_PI430048170	0.000523741	0.0193228	2.86165	2.81647	3.361	P	P	P	8.70432	8.6693	8.80804	P	P	P	LNCV6_141793_PI430048170	mRNA	CCTTCTTTCTGTTCAGTCCTAAAATTCGAAATAAAGTGAGACTATGGTTCACCTGTATAA	NM_005335	RefSeq	chr3	-	121631397	121660948	HCLS1	3059	hematopoietic cell-specific Lyn substrate 1, transcript variant 1	GO:0005515|GO:0051897|GO:0008284|GO:0017124|GO:2000251|GO:0050731|GO:0005634|GO:0032403|GO:0042993|GO:0005739|GO:0035556|GO:0005737|GO:0033138|GO:0030833|GO:0045944|GO:0030854|GO:0001085|GO:0030041|GO:0009725|GO:0005667|GO:0006355|GO:0042531|GO:0019901|GO	.	NA	-	.	NA	NA	NA	NA	NA	NA	NA	NA	NA
LNCV6_142640_PI430048170	9.92999e-05	0.296705	8.43112	8.2381	8.1819	P	P	P	10.1337	10.0314	9.95094	P	P	P	LNCV6_142640_PI430048170	mRNA	TCTGTCAGCAGGAGAGTTTTACCTATTGCATGGAAAGATGCTCATTATATATTGTGAAGT	NM_001168399	RefSeq	chrX	-	103309345	103310955	BEX2	84707	brain expressed X-linked 2, transcript variant 1	GO:0007049|GO:0005737|GO:0051726|GO:0006915|GO:0042981|GO:0005634	.	NA	-	.	NA	NA	NA	NA	NA	NA	NA	NA	NA
LNCV6_108615_PI430048170	0.00912262	0.492058	3.43173	3.56557	3.46606	P	P	P	4.25401	4.62784	4.62326	P	P	P	LNCV6_108615_PI430048170	mRNA	ATGGTTCTGGAATGAATTTGTTGCAGATACAGGATAAAGTCTGGTCCCAGGCTTGCCTTG	NM_005108	RefSeq	chr3	+	38346759	38414976	XYLB	9942	xylulokinase homolog (H. influenzae)	GO:0005998|GO:0005997|GO:0005975|GO:0004856|GO:0046835|GO:0006091|GO:0005524|GO:0070062|GO:0042732	.	NA	-	.	NA	NA	NA	NA	NA	NA	NA	NA	NA
LNCV6_137999_PI430048170	5.71922e-05	5.22215	11.6497	11.5293	11.3182	P	P	P	9.23298	9.17057	8.94311	P	P	P	LNCV6_137999_PI430048170	mRNA	GGAGGGCTGTTTTAACATCTTTGAAGTATGGCTTGCTGAATATCTTTACCAACATCTTGA	NM_016048	RefSeq	chr5	+	129094748	129114026	ISOC1	51015	isochorismatase domain containing 1	GO:0008150|GO:0003674|GO:0008152|GO:0003824|GO:0070062|GO:0005777	.	NA	-	.	NA	NA	NA	NA	NA	NA	NA	NA	NA
LNCV6_143271_PI430048170	1.97507e-05	0.0204101	4.07228	3.66997	3.55869	P	P	P	9.52889	9.47173	9.17098	P	P	P	LNCV6_143271_PI430048170	mRNA	CTTCAGGTCCGTGGGCCGTATCTGTCACAATAAATGGCCAGTGCTGCTTCTTGCAAAAAA	NM_001323	RefSeq	chr11	+	66011990	66013505	CST6	1474	cystatin E/M	GO:0010951|GO:0004869|GO:0008544|GO:0009653|GO:0001533|GO:0070062	.	NA	-	.	NA	NA	NA	NA	NA	NA	NA	NA	NA
LNCV6_133106_PI430048170	0.00816826	0.0750113	1.87772	2.0521	0.694952	A	A	A	5.40396	5.57653	5.16181	P	P	P	LNCV6_133106_PI430048170	mRNA	ACAAGATCTTGGTTTGGCTTCATGTACTGTTTTCTAGAGAGAGTGCTACGAAAAACTTAT	NM_016356	RefSeq	chr6	-	24171754	24358052	DCDC2	51473	doublecortin domain containing 2, transcript variant 1	GO:0035556|GO:0005515|GO:0048813|GO:0045880|GO:0006968|GO:0005737|GO:0008542|GO:0072372|GO:0001764	.	NA	-	.	NA	NA	NA	NA	NA	NA	NA	NA	NA
LNCV6_131366_PI430048170	8.0149e-07	0.0709169	0.225038	0.21473	0.313837	A	A	A	4.1057	4.04508	4.05736	P	P	P	LNCV6_131366_PI430048170	mRNA	GGAGATAATTCCTACGGGGAATTCTTAAAACTGTGCTCAACTATTAAAATGAATGAGCTT	NM_000397	RefSeq	chrX	+	37780016	37813461	CYBB	1536	cytochrome b-245, beta polypeptide	GO:0045730|GO:0005515|GO:0002474|GO:0005886|GO:0050660|GO:0006801|GO:0050665|GO:0046872|GO:0030425|GO:0005739|GO:0006954|GO:0016175|GO:0030670|GO:0043025|GO:0034765|GO:0090382|GO:0006811|GO:0005791|GO:0042554|GO:0048010|GO:0005794|GO:0005244|GO:0051701|GO	.	NA	-	.	NA	NA	NA	NA	NA	NA	NA	NA	NA
LNCV6_127450_PI430048170	0.000150864	0.293532	10.4362	10.2295	10.3516	P	P	P	12.0999	12.0643	12.164	P	P	P	LNCV6_127450_PI430048170	mRNA	GTCATAGCCTTGGTTTAGTTTTGGGTGGAGCTGAATAAACCCAAATCTCAGGGCAAAAAA	NM_001541	RefSeq	chr11	+	111912735	111914093	HSPB2	3316	heat shock 27kDa protein 2	GO:0006986|GO:0005515|GO:0005737|GO:0005634|GO:0043085|GO:0008047|GO:0005829	.	NA	-	.	NA	NA	NA	NA	NA	NA	NA	NA	NA
LNCV6_134899_PI430048170	0.00155313	0.107634	2.31649	2.76906	2.22662	A	P	A	5.701	5.58545	5.72951	P	P	P	LNCV6_134899_PI430048170	mRNA	GGGGAAGGGGGATATAGAGGTCACAAGGAAATAAAAATCATCTTTCATCTTTAATTTTAC	NM_006536	RefSeq	chr1	+	86424085	86456557	CLCA2	9635	chloride channel accessory 2	GO:0030054|GO:0005886|GO:0005576|GO:0055085|GO:0005254|GO:0046872|GO:0009925|GO:0034220|GO:0005887|GO:0006508|GO:0006810|GO:0007155|GO:0008237|GO:0015276	.	NA	-	.	NA	NA	NA	NA	NA	NA	NA	NA	NA
LNCV6_133894_PI430048170	0.000315584	0.190064	0.722295	0.316658	0.31115	A	A	A	2.68669	3.14404	2.69655	P	P	P	LNCV6_133894_PI430048170	mRNA	TGCTCATGTCATAAGCTATGTTGACAGTTGCCAGTGGAAATGTTGGGTTGGTTCAAAAAA	NM_183002	RefSeq	chr14	-	70044216	70189070	SLC8A3	6547	solute carrier family 8 (sodium/calcium exchanger), member 3, transcript variant c	GO:0005516|GO:0060402|GO:0005886|GO:0005874|GO:0055085|GO:0005432|GO:0021537|GO:0005739|GO:0042383|GO:0007154|GO:0043197|GO:0002244|GO:0007596|GO:0070588|GO:0043025|GO:0035725|GO:0016021|GO:0071320|GO:0006811	.	NA	-	.	NA	NA	NA	NA	NA	NA	NA	NA	NA
LNCV6_143458_PI430048170	0.00571155	0.0177351	3.06044	2.03248	1.4864	P	A	A	8.20095	8.18895	8.09255	P	P	P	LNCV6_143458_PI430048170	mRNA	GGTTTTTTAAATTTTTTCAGTGAGCGTGGTGACTGCAGAGGTTAGTGCTGTGAAAAGCTG	NM_014141	RefSeq	chr7_KI270808v1_alt	+	2412	204591	CNTNAP2	26047	contactin associated protein-like 2	GO:0030424|GO:0008038|GO:0021987|GO:0019226|GO:0030425|GO:0031175|GO:0021794|GO:0008076|GO:0043025|GO:0043204|GO:0030534|GO:0007612|GO:0030673|GO:0007155|GO:0071109|GO:0005794|GO:0009986|GO:0044224|GO:0071625|GO:0021756|GO:0016020|GO:0045163|GO:0007420|GO	.	NA	-	.	NA	NA	NA	NA	NA	NA	NA	NA	NA
LNCV6_134430_PI430048170	1.47077e-05	0.0723225	1.51482	1.4225	1.15166	A	A	A	5.06166	5.34506	5.05532	P	P	P	LNCV6_134430_PI430048170	mRNA	AGTAGGGCTTGGTGAATGCTGCTGAGTGAATGAGTAAATAAACTCTTCAAGGCCAAGGGA	NM_000491	RefSeq	chr1	+	22653188	22661536	C1QB	713	complement component 1, q subcomponent, B chain	GO:0005515|GO:0006956|GO:0048839|GO:0005581|GO:0045087|GO:0006958|GO:0072562|GO:0005576|GO:0005602|GO:0042803|GO:0070062	.	NA	-	.	NA	NA	NA	NA	NA	NA	NA	NA	NA
LNCV6_128680_PI430048170	0.0237359	0.226105	3.03888	1.79684	1.7825	P	A	A	4.72164	4.40523	4.27479	P	P	P	LNCV6_128680_PI430048170	mRNA	TATTAGGGCCCTGGGGAAGAAACAAGAGCCATTAAAATCTCTTTGGTTTGAAGCAAAAAA	NM_001869	RefSeq	chr7	+	130266862	130289797	CPA2	1358	carboxypeptidase A2 (pancreatic)	GO:0007039|GO:0006508|GO:0004180|GO:0008270|GO:0005576|GO:0004181	.	NA	-	.	NA	NA	NA	NA	NA	NA	NA	NA	NA
LNCV6_126938_PI430048170	0.00650439	2.29268	6.58497	7.01996	7.00644	P	P	P	5.77092	5.71784	5.56453	P	P	P	LNCV6_126938_PI430048170	mRNA	GTGACAAACGCAATGCAAAAACAATCCTCTTTCTCTCTCTTAATGCATGATACAGAATAA	NM_003836	RefSeq	chr14	+	100726864	100735130	DLK1	8788	delta-like 1 homolog (Drosophila)	GO:0010468|GO:0045746|GO:0003674|GO:0007219|GO:0048706|GO:0007275|GO:0016021|GO:0009791|GO:0005615|GO:0030154|GO:0009897	.	NA	-	.	NA	NA	NA	NA	NA	NA	NA	NA	NA
LNCV6_138406_PI430048170	1.03946e-05	0.0368769	0.355877	0.663197	0.248617	A	A	A	5.20371	4.9682	5.38225	P	P	P	LNCV6_138406_PI430048170	mRNA	CATTGTGTTCATGACCATGTAGCTCATGTTGAAATTAAAGTTTTTGGCTTTTCTAACCTG	NM_001205317	RefSeq	chr20	-	44751803	44810338	RIMS4	140730	regulating synaptic membrane exocytosis 4, transcript variant 1	GO:0048786|GO:0030054|GO:2000300|GO:0097060|GO:0042391|GO:0006836|GO:0006887|GO:0044325	.	NA	-	.	NA	NA	NA	NA	NA	NA	NA	NA	NA
LNCV6_125570_PI430048170	0.000368868	0.434399	4.89409	4.97258	4.75439	P	P	P	5.96962	6.02616	6.22929	P	P	P	LNCV6_125570_PI430048170	mRNA	CTTCACACTTGCGGGCTGCATCAGCACACGCTCCTATCAACCCAAGTACTGTGGAGTTTG	NM_003882	RefSeq	chr8	+	133191038	133231689	WISP1	8840	WNT1 inducible signaling pathway protein 1, transcript variant 1	GO:0007165|GO:0005737|GO:0005178|GO:0060548|GO:0007267|GO:0005578|GO:0016055|GO:0007155|GO:0008201|GO:0005615|GO:0001558|GO:0005520	.	NA	-	.	NA	NA	NA	NA	NA	NA	NA	NA	NA
LNCV6_137402_PI430048170	0.00152115	4.24923	7.644	7.69594	7.70252	P	P	P	5.64692	5.71593	5.39994	P	P	P	LNCV6_137402_PI430048170	mRNA	TACGCCTTTGTGTCTGGCATTTGTTTAAGAAAATGAAATGAAGGAAACACTGTGCAATGT	NM_194272	RefSeq	chr15	-	64739895	64775571	RBPMS2	348093	RNA binding protein with multiple splicing 2	GO:0000166|GO:0003676	.	NA	-	.	NA	NA	NA	NA	NA	NA	NA	NA	NA
LNCV6_137112_PI430048170	0.00194275	2.99099	10.1803	9.8726	9.89861	P	P	P	8.3579	8.40555	8.46476	P	P	P	LNCV6_137112_PI430048170	mRNA	ATATCGGACCTGGATTCAAGGTTTGGCATTGCTGTTTTCAAAGTATGTAATCTTTTAGAT	NM_012334	RefSeq	chr5	-	16661906	16936276	MYO10	4651	myosin X	GO:0005515|GO:0005516|GO:0043005|GO:0005886|GO:0008360|GO:0031527|GO:0016459|GO:0030898|GO:0032433|GO:0005829|GO:0051489|GO:0005737|GO:0051015|GO:0007411|GO:0060002|GO:0043025|GO:0005938|GO:0022409|GO:0005730|GO:0005547|GO:0030507|GO:0005524|GO:0001726|GO	.	NA	-	.	NA	NA	NA	NA	NA	NA	NA	NA	NA
LNCV6_141046_PI430048170	0.0130405	3.85856	5.29053	5.15359	5.28183	P	P	P	3.25691	3.68021	2.82218	P	P	P	LNCV6_141046_PI430048170	mRNA	GCCACACAGCGTGTAACCTGAAGTCATCTAGATTATGGGGAAACTGCTCAGCTTCAATAA	NM_052960	RefSeq	chr1	+	9997196	10016020	RBP7	116362	retinol binding protein 7, cellular	GO:0005215|GO:0005737|GO:0016918|GO:0006810|GO:0019841	.	NA	-	.	NA	NA	NA	NA	NA	NA	NA	NA	NA
LNCV6_142927_PI430048170	6.83976e-06	64.0007	8.38423	8.33855	8.23278	P	P	P	2.45071	2.33097	2.16368	A	A	A	LNCV6_142927_PI430048170	mRNA	TTGCCTCAAGAGAGGGACAATGTAGCTTTATTTTACAAGAAGGCATAGTTAGATTTCTAT	NM_032229	RefSeq	chr13	-	85792786	85799348	SLITRK6	84189	SLIT and NTRK-like family, member 6	GO:0008344|GO:0009986|GO:0007605|GO:0007409|GO:0007416|GO:0031223|GO:0021562|GO:0060384|GO:0001964|GO:0035264|GO:0060007|GO:0002088|GO:0005887|GO:0090102|GO:0002093|GO:0007601	.	NA	-	.	NA	NA	NA	NA	NA	NA	NA	NA	NA
LNCV6_131925_PI430048170	0.037636	3.47347	3.28938	3.58881	3.17724	P	P	P	0.722872	2.19595	1.40632	A	A	A	LNCV6_131925_PI430048170	mRNA	CTATGCTTCTTCAATGGTAACATCATCAAGTATCCTTGACCACTTTACTGGGGATTTTTT	NM_001101357	RefSeq	chrX	+	134237046	134245778	CCDC160	NA	coiled-coil domain containing 160	NA	.	NA	-	.	NA	NA	NA	NA	NA	NA	NA	NA	NA
LNCV6_136350_PI430048170	1.66383e-05	0.140836	0.0781112	0.351257	0.128479	A	A	A	2.93242	2.9509	3.16171	P	P	P	LNCV6_136350_PI430048170	mRNA	CATCCCTATGCTGTACTTAAATGTCGAACAAAATGAGAGACAAAAATGAAGGAATCAAAC	NM_001040129	RefSeq	chr5	+	148268859	148286210	SPINK13	153218	serine peptidase inhibitor, Kazal type 13 (putative)	GO:0010951|GO:0004867|GO:0005576	.	NA	-	.	NA	NA	NA	NA	NA	NA	NA	NA	NA
LNCV6_129233_PI430048170	0.000536482	2.38042	9.00648	8.96532	8.72509	P	P	P	7.66299	7.753	7.53465	P	P	P	LNCV6_129233_PI430048170	mRNA	AATTCCCAGTGGTGTTTCTTAAGGTTCTATCTTGTGCCATGATGAATAAAAAGTTAAGCA	NM_013427	RefSeq	chrX	-	11137542	11665701	ARHGAP6	395	Rho GTPase activating protein 6, transcript variant 1	GO:0051056|GO:0017124|GO:0007264|GO:0005884|GO:0010518|GO:0009967|GO:0007202|GO:0007266|GO:0015629|GO:0043087|GO:0005100|GO:0051895|GO:0005829|GO:0051497|GO:0005737|GO:0016004|GO:0043274|GO:0032321|GO:0048041|GO:0005070|GO:0030041	.	NA	-	.	NA	NA	NA	NA	NA	NA	NA	NA	NA
LNCV6_136415_PI430048170	0.00425438	0.468465	9.47493	9.30718	9.21469	P	P	P	10.423	10.4496	10.4181	P	P	P	LNCV6_136415_PI430048170	mRNA	TGTCCTGGAGGAATTCATAGCCTCATGGGGCAAAAGTAAATAAACAGCTTATTACAATTC	NM_001136022	RefSeq	chr14	+	24366910	24379606	NFATC4	4776	nuclear factor of activated T-cells, cytoplasmic, calcineurin-dependent 4, transcript variant 1	GO:0005515|GO:0006366|GO:2001235|GO:0005634|GO:0042975|GO:0005829|GO:0007507|GO:0005737|GO:0034644|GO:0006954|GO:0048167|GO:0045944|GO:0045111|GO:0071285|GO:0005667|GO:0001569|GO:0008630|GO:0032760|GO:0003713|GO:0000122|GO:0000978|GO:0001078|GO:0045333|GO	.	NA	-	.	NA	NA	NA	NA	NA	NA	NA	NA	NA
LNCV6_103002_PI430048170	0.00904979	0.496473	11.0432	10.6607	10.862	P	P	P	11.8377	11.9194	11.8635	P	P	P	LNCV6_103002_PI430048170	mRNA	CAGGATGAGATGCTGCGGCGGGTGGATGCTGAGAACAGGCTGCAGACCATGAAGGAGGAA	NM_170707	RefSeq	chr1	+	156114669	156140089	LMNA	4000	lamin A/C, transcript variant 1	GO:0005882|GO:0005515|GO:0007077|GO:2001237|GO:0034504|GO:0048471|GO:0005634|GO:0090343|GO:0005635|GO:0006921|GO:0005638|GO:0005829|GO:0030968|GO:0005737|GO:1900180|GO:0090201|GO:0035105|GO:0030334|GO:0007084|GO:0030951|GO:0071456|GO:0006915|GO:0007517|GO	.	NA	-	.	NA	NA	NA	NA	NA	NA	NA	NA	NA
LNCV6_49834_PI430048170	0.000465685	0.432689	7.51083	7.39227	7.23706	P	P	P	8.50599	8.57627	8.69065	P	P	P	LNCV6_49834_PI430048170	mRNA	GTATTGCATAGACATGTCTGTGAAAATAAAAGCACCCATTTTGCTAAGGCTTTCTGAGAA	NM_001303107	RefSeq	chr9	-	101473157	101487221	TMEM246	84302	transmembrane protein 246, transcript variant 2	GO:0016021	.	NA	-	.	NA	NA	NA	NA	NA	NA	NA	NA	NA
LNCV6_133869_PI430048170	0.0144904	2.44389	4.54822	4.44943	4.365	P	P	P	3.32463	2.76824	3.33821	P	P	P	LNCV6_133869_PI430048170	mRNA	CTGGGGCAGAGGATAGGGAATCTCTTATTAAAACTAACATGAAATATGTGTTGTTTTCAT	NM_138961	RefSeq	chr11	-	124753122	124762327	ESAM	90952	endothelial cell adhesion molecule	GO:0016337|GO:0005912|GO:0005886|GO:0007596|GO:0016021|GO:0005923|GO:0050900|GO:0007156|GO:0070062	.	NA	-	.	NA	NA	NA	NA	NA	NA	NA	NA	NA
LNCV6_130691_PI430048170	0.000772817	2.30215	8.80636	8.68598	8.5403	P	P	P	7.59579	7.53867	7.28261	P	P	P	LNCV6_130691_PI430048170	mRNA	CTTACTGGCTTACCACATTAAATGATTTCTCTCTCCTAACTCAGCTCAAATGGGCAGCCA	NM_000121	RefSeq	chr19	-	11377204	11384342	EPOR	2057	erythropoietin receptor, transcript variant 1	GO:0038162|GO:0007507|GO:0005515|GO:0046697|GO:0007165|GO:0007420|GO:0005887|GO:0005576|GO:0042802|GO:0004900	.	NA	-	.	NA	NA	NA	NA	NA	NA	NA	NA	NA
LNCV6_129804_PI430048170	0.0386359	2.54559	5.52079	5.75342	5.58321	P	P	P	4.74886	4.1939	3.6861	P	P	P	LNCV6_129804_PI430048170	mRNA	CAGTCCTCCCAGATTTCTGTAGCTATTTATGTAGCAGGCTCAATAAAATGTCTTCTCTCT	NM_001278512	RefSeq	chr15	-	82659280	82709908	AP3B2	8120	adaptor-related protein complex 3, beta 2 subunit, transcript variant 1	GO:0030665|GO:0005215|GO:0048490|GO:0005737|GO:0005794|GO:0030137|GO:0030123|GO:0006892|GO:0005654|GO:0008089|GO:0006886	.	NA	-	.	NA	NA	NA	NA	NA	NA	NA	NA	NA
LNCV6_133728_PI430048170	0.000411815	0.386996	5.46073	5.20685	5.20936	P	P	P	6.76208	6.65926	6.57324	P	P	P	LNCV6_133728_PI430048170	mRNA	CTACAGACAGCTCAACTTTCCTTGATATGTAACACTTTAGGAAAATAACTGCCTTGTAAA	NM_001025266	RefSeq	chr3	-	185078049	185153014	C3orf70	285382	chromosome 3 open reading frame 70	NA	.	NA	-	.	NA	NA	NA	NA	NA	NA	NA	NA	NA
LNCV6_61387_PI430048170	0.00153783	0.300514	3.67321	3.46569	4.01308	P	P	P	5.749	5.40328	5.20322	P	P	P	LNCV6_61387_PI430048170	mRNA	AGAAGATCCTCACCAAGTTCAAACAGGATCAGGAATACCTCTACTAACAACCAATTTGTC	NM_014226	RefSeq	chr14	-	102228820	102305200	MOK	5891	MOK protein kinase, transcript variant 1	GO:0007165|GO:0005737|GO:0004672|GO:0004674|GO:0051726|GO:0006468|GO:0005524|GO:0004693	.	NA	-	.	NA	NA	NA	NA	NA	NA	NA	NA	NA
LNCV6_130814_PI430048170	0.000145203	0.252684	6.65942	6.70699	6.41977	P	P	P	8.69239	8.50031	8.55654	P	P	P	LNCV6_130814_PI430048170	mRNA	CTCAGTCAGTGCCTAACTGCACATACAAAAATAAAACCTTCTTTCTGTAATCTACCAAAA	NM_173505	RefSeq	chr18	-	23598925	23662885	ANKRD29	147463	ankyrin repeat domain 29	NA	.	NA	-	.	NA	NA	NA	NA	NA	NA	NA	NA	NA
LNCV6_142879_PI430048170	3.48391e-06	0.291225	9.21246	9.16753	9.12912	P	P	P	10.8966	11.0076	10.9434	P	P	P	LNCV6_142879_PI430048170	mRNA	GTCGGAAGGGTTTTTGTTTTTGTTTCTGTTGCCATTTGTGTAAATACTAGTCTTTTTGGA	NM_004429	RefSeq	chrX	+	68828996	68842163	EFNB1	1947	ephrin-B1	GO:0005515|GO:0048013|GO:0005886|GO:0001755|GO:0007267|GO:0045202|GO:0005634|GO:0009880|GO:0005737|GO:0046875|GO:0005887|GO:0007411|GO:0042102|GO:0045121|GO:0007155|GO:0070062	.	NA	-	.	NA	NA	NA	NA	NA	NA	NA	NA	NA
LNCV6_137108_PI430048170	0.0111048	0.325786	1.64234	2.43216	1.64435	A	P	A	3.77602	3.6066	3.30205	P	P	P	LNCV6_137108_PI430048170	mRNA	CCAGCGTGGCTGCTTTCAAGTTCTTTGCAATTAAAGGTTCTGTATAAAACCAAGAAAAAA	NM_006001	RefSeq	chr13	-	19173769	19181852	TUBA3C	7278	tubulin, alpha 3c	GO:0005515|GO:0051258|GO:0005874|GO:0003924|GO:0005634|GO:0005525|GO:0006184|GO:0005737|GO:0006457|GO:0005200|GO:0051084|GO:0007017|GO:0044267	.	NA	-	.	NA	NA	NA	NA	NA	NA	NA	NA	NA
LNCV6_129407_PI430048170	0.00151403	0.243983	10.8724	10.6349	10.5087	P	P	P	12.7178	12.763	12.6627	P	P	P	LNCV6_129407_PI430048170	mRNA	TGTGTGTATCATCGGTGGGATGACAGAACAAACATATTTATGATCATGAATAATGTGCTT	NM_001128205	RefSeq	chr8	+	69492792	69660912	SULF1	23213	sulfatase 1, transcript variant 1	GO:0005886|GO:0051216|GO:0005783|GO:0048706|GO:0030177|GO:0008449|GO:0005615|GO:0032836|GO:0030513|GO:0002063|GO:0004065|GO:0030201|GO:0048010|GO:0030336|GO:0005794|GO:0005795|GO:0009986|GO:0001822|GO:0005509|GO:0006915|GO:0035860|GO:0010575|GO:0060686|GO	.	NA	-	.	NA	NA	NA	NA	NA	NA	NA	NA	NA
LNCV6_132923_PI430048170	0.00194178	2.38943	4.25698	3.85765	3.9389	P	P	P	2.65714	2.92006	2.72478	P	P	P	LNCV6_132923_PI430048170	mRNA	CCTTGTATGTATTTCATGACTGGACTTACTGCTCTGTCAGCTTTTGTATATGAATCTTAA	NM_000810	RefSeq	chr15	+	26866718	26949210	GABRA5	2558	gamma-aminobutyric acid (GABA) A receptor, alpha 5, transcript variant 1	GO:0005215|GO:0005230|GO:0030054|GO:0005886|GO:0007605|GO:0007268|GO:0050811|GO:0005254|GO:0030425|GO:0043524|GO:0034220|GO:0045211|GO:0090102|GO:0006810|GO:0004872|GO:0001662|GO:0008306|GO:0004890|GO:0034707|GO:0060119|GO:0007214|GO:0055085|GO:0032809|GO	.	NA	-	.	NA	NA	NA	NA	NA	NA	NA	NA	NA
LNCV6_109684_PI430048170	0.00609898	3.05874	7.5891	7.31008	7.52692	P	P	P	5.87073	6.16072	5.49414	P	P	P	LNCV6_109684_PI430048170	mRNA	TCACAAAGAAAATCCAGCTTCCTGCAGAGGTGGATCCTGTGACAGTATTTGCCTCACTTT	NM_014365	RefSeq	chr12	+	119178789	119194746	HSPB8	26353	heat shock 22kDa protein 8	GO:0005622|GO:0005515|GO:0008150|GO:0005737|GO:0005794|GO:0004672|GO:0005654|GO:0005634|GO:0042802	.	NA	-	.	NA	NA	NA	NA	NA	NA	NA	NA	NA
LNCV6_143974_PI430048170	0.00129521	0.499491	10.2581	10.5781	10.4237	P	P	P	11.3975	11.3076	11.5651	P	P	P	LNCV6_143974_PI430048170	mRNA	GAAGATTCCTAAAATTTGAGAGACAAAATAAATGGAAGACATGAGAACCTTCCAGAGTCC	NM_002116	RefSeq	chr6_GL000256v2_alt	+	1240283	1243714	HLA-A	3105	major histocompatibility complex, class I, A, transcript variant 1 (A*03:01:0:01 allele)	GO:0005515|GO:0002474|GO:0005886|GO:0005783|GO:0019221|GO:0042608|GO:0006955|GO:0060337|GO:0042605|GO:0030670|GO:0071556|GO:0016032|GO:0070062|GO:0060333|GO:0042270|GO:0032729|GO:0012507|GO:0030881|GO:0002480|GO:0005794|GO:0002486|GO:0009986|GO:2000568|GO	.	NA	-	.	NA	NA	NA	NA	NA	NA	NA	NA	NA
LNCV6_80205_PI430048170	4.77781e-07	446.273	11.0718	10.9341	10.7176	P	P	P	2.26511	2.14629	1.90572	A	A	A	LNCV6_80205_PI430048170	mRNA	TGTGATTGTGGAAGATACCGGAAATTTGTTGGACAACTGGATATTAGTATTGCTCGGCTC	NM_006438	RefSeq	chr8	+	119067184	119106963	COLEC10	10584	collectin sub-family member 10 (C-type lectin)	GO:0005737|GO:0005581|GO:0005576|GO:0005537	.	NA	-	.	NA	NA	NA	NA	NA	NA	NA	NA	NA
LNCV6_64877_PI430048170	0.00603872	2.0657	7.19024	7.40613	7.48525	P	P	P	6.31891	6.29462	6.34369	P	P	P	LNCV6_64877_PI430048170	mRNA	GTCACGAGAAATGAAACAGGACCTTATCAATGTGAAATACGGGACCGATATGGTGGCATC	NM_002780	RefSeq	chr19	-	43192701	43205774	PSG4	5672	pregnancy specific beta-1-glycoprotein 4, transcript variant 1	GO:0007565|GO:0070062	.	NA	-	.	NA	NA	NA	NA	NA	NA	NA	NA	NA
LNCV6_144695_PI430048170	0.00633853	0.119794	0.384587	0.353798	0.413904	A	A	A	3.7981	3.46353	2.95331	P	P	P	LNCV6_144695_PI430048170	mRNA	CAGCATGTATTATGCACTTCATTTCTCTACTGTGTGGAGAAAGCAATAAACATTATGAGA	NM_012259	RefSeq	chr6	+	125749585	125761269	HEY2	23493	hes-related family bHLH transcription factor with YRPW motif 2	GO:0005515|GO:0060045|GO:0000988|GO:0003700|GO:0006366|GO:0000983|GO:0003184|GO:0003186|GO:0007219|GO:0016580|GO:0017053|GO:0014031|GO:0060716|GO:0046983|GO:0010667|GO:0001102|GO:0045746|GO:0000122|GO:0065004|GO:0060347|GO:0060633|GO:0045607|GO:0061156|GO	.	NA	-	.	NA	NA	NA	NA	NA	NA	NA	NA	NA
LNCV6_126899_PI430048170	0.00104454	0.176915	5.39645	5.20648	5.11587	P	P	P	7.74435	7.73354	7.75182	P	P	P	LNCV6_126899_PI430048170	mRNA	TTTAGCCTCCACCTTGTCTAAGCTTTGGTCTATAAAGTGCGCTACAGAAATGGCAAAAAA	NM_001261461	RefSeq	chr12	-	54292106	54301037	NFE2	4778	nuclear factor, erythroid 2, transcript variant 3	GO:0003700|GO:0006357|GO:0050699|GO:0008015|GO:0003713|GO:0007267|GO:0005634|GO:0007275|GO:0006337|GO:0030502|GO:0015629|GO:0006351|GO:2000758|GO:0043565|GO:0007599|GO:0005737|GO:0047485|GO:0007596|GO:0016605|GO:0060716|GO:0005654|GO:0045893|GO:0034242	.	NA	-	.	NA	NA	NA	NA	NA	NA	NA	NA	NA
LNCV6_132435_PI430048170	0.000588162	1475.01	11.3626	11.323	11.2201	P	P	P	0.172907	0.842724	1.14966	A	A	A	LNCV6_132435_PI430048170	mRNA	GGTGGATCCATTTCAAGTATTTATGCAAATGTGTCTCTGAACTAAAGTGTGATCTTATGC	NM_007037	RefSeq	chr11	-	130404922	130428644	ADAMTS8	11095	ADAM metallopeptidase with thrombospondin type 1 motif, 8	GO:0031012|GO:0008285|GO:0005178|GO:0009673|GO:0035435|GO:0006508|GO:0005578|GO:0008270|GO:0004222|GO:0008201|GO:0008237	.	NA	-	.	NA	NA	NA	NA	NA	NA	NA	NA	NA
LNCV6_138821_PI430048170	0.000166504	28.6794	4.94686	5.31117	5.03346	P	P	P	0.327526	0.254823	0.206283	A	A	A	LNCV6_138821_PI430048170	mRNA	CCAAGACAAATGAAGACTGAAACCAAGAATATTGTTCTTATGCTGGAAATTTGACTGCTA	NM_130467	RefSeq	chrX	+	55220346	55224108	PAGE5	90737	P antigen family, member 5 (prostate associated), transcript variant 1	NA	.	NA	-	.	NA	NA	NA	NA	NA	NA	NA	NA	NA
LNCV6_126633_PI430048170	0.00327235	0.210764	7.61963	7.33739	7.14121	P	P	P	9.65337	9.63366	9.58974	P	P	P	LNCV6_126633_PI430048170	mRNA	GTGCGACAGAATGCAGTTAGAATCAGTTCATATCACCATTAAAATCATCCATTCAGAAAC	NM_001097634	RefSeq	chr9	+	76441665	76507416	GCNT1	2650	glucosaminyl (N-acetyl) transferase 1, core 2, transcript variant 1	GO:0005515|GO:0005802|GO:0032868|GO:0003829|GO:0031985|GO:0016266|GO:0050901|GO:0005615|GO:0060352|GO:0009101|GO:0000139|GO:0006493|GO:0060993|GO:0048729|GO:0016021|GO:0044267|GO:0043687	.	NA	-	.	NA	NA	NA	NA	NA	NA	NA	NA	NA
LNCV6_131717_PI430048170	0.00400232	0.35566	12.0323	11.811	11.6251	P	P	P	13.2953	13.2904	13.3838	P	P	P	LNCV6_131717_PI430048170	mRNA	GTGTGATCTTTACTGATGCACTCATGACAAGTACCCAATGTATTTTAGCTATTTTAGTAG	NM_001142483	RefSeq	chr5	-	111729302	111756251	NREP	9315	neuronal regeneration related protein, transcript variant 11	GO:0005515|GO:0031103|GO:0005737|GO:0045664|GO:0005634|GO:0017015	.	NA	-	.	NA	NA	NA	NA	NA	NA	NA	NA	NA
LNCV6_135127_PI430048170	0.00110183	0.14277	0.308636	0.247818	0.217724	A	A	A	2.861	3.26632	3.04442	P	P	P	LNCV6_135127_PI430048170	mRNA	CTCCAGTCTGATTTTATAAAGTGCTGACGAGATTGGGAATAAAGAGGCATAAAGAAAAAA	NM_182847	RefSeq	chr2	+	219514169	219538772	ASIC4	55515	acid sensing (proton gated) ion channel family member 4	GO:0034220|GO:0005887|GO:0005272|GO:0006810|GO:0035725|GO:0015081|GO:0005216	.	NA	-	.	NA	NA	NA	NA	NA	NA	NA	NA	NA
LNCV6_129425_PI430048170	0.00713025	6.19224	6.03207	6.32408	6.07814	P	P	P	3.85292	3.64625	2.89672	P	P	P	LNCV6_129425_PI430048170	mRNA	TCTCAAGGGAGAGGGAGGGGGCGGAGCGGAATAAATAGTAACTTATTTAAGAAATGCAAA	NM_021098	RefSeq	chr16	+	1153240	1221772	CACNA1H	8912	calcium channel, voltage-dependent, T type, alpha 1H subunit, transcript variant 1	GO:0086010|GO:0005886|GO:0008332|GO:0008016|GO:0007520|GO:0005891|GO:2000344|GO:0046872|GO:0032870|GO:0034651|GO:0042383|GO:0070509|GO:0035865|GO:0006936|GO:0007517|GO:0007411|GO:0005901|GO:0097110|GO:0042391|GO:0070588|GO:0006810|GO:0032342|GO:0034765|GO	.	NA	-	.	NA	NA	NA	NA	NA	NA	NA	NA	NA
LNCV6_128039_PI430048170	0.000857381	2.5223	8.8252	8.64653	8.51564	P	P	P	7.3518	7.23958	7.40374	P	P	P	LNCV6_128039_PI430048170	mRNA	GAGTTATTGTTAACAAAGAGACCCAAGAAAAGCTGCTAATGTCCTCTTATCATTGTTGTT	NM_000044	RefSeq	chrX	+	67544031	67730619	AR	367	androgen receptor, transcript variant 1	GO:0005515|GO:2001237|GO:0010467|GO:0008284|GO:0004882|GO:0000790|GO:0003700|GO:0006367|GO:0044212|GO:0008013|GO:0008283|GO:0007267|GO:0005634|GO:0051259|GO:0005737|GO:0051092|GO:0045944|GO:0045945|GO:0001085|GO:0046983|GO:0043401|GO:0006810|GO:0030850|GO	.	NA	-	.	NA	NA	NA	NA	NA	NA	NA	NA	NA
LNCV6_145093_PI430048170	0.00568318	2.60579	10.063	9.8461	9.62516	P	P	P	8.52239	8.41047	8.48714	P	P	P	LNCV6_145093_PI430048170	mRNA	GCAAATTCTAGCAGTATGTCTTCGATAACTTGGATGTTAGGATAGCCAATATGTACAAAA	NM_006041	RefSeq	chr17	+	14301049	14349404	HS3ST3B1	9953	heparan sulfate (glucosamine) 3-O-sulfotransferase 3B1, transcript variant 1	GO:0000139|GO:0005975|GO:0005887|GO:0033872|GO:0009405|GO:0044281|GO:0015012|GO:0008467|GO:0030203|GO:0015015|GO:0006024	.	NA	-	.	NA	NA	NA	NA	NA	NA	NA	NA	NA
LNCV6_137415_PI430048170	0.0181287	0.193446	1.26684	0.217439	0.269351	A	A	A	3.10164	3.0131	3.00419	P	P	P	LNCV6_137415_PI430048170	mRNA	TATATGCTGGTACATGCTTTAAACATGGAGGTAACCCCACACGAGACATTCAGTGACAGG	NM_014981	RefSeq	chr3	-	108380368	108529322	MYH15	22989	myosin, heavy chain 15	GO:0005516|GO:0032982|GO:0003774|GO:0008152|GO:0003779|GO:0030016|GO:0005524	.	NA	-	.	NA	NA	NA	NA	NA	NA	NA	NA	NA
LNCV6_129931_PI430048170	0.011153	2.39219	4.82534	4.85147	4.83457	P	P	P	3.83867	3.43322	3.42469	P	P	P	LNCV6_129931_PI430048170	mRNA	GCCCAAGGGATCCATAATAATAATTGCTTGGCCAGCCATGTGGCCTGCTGGCGTAAAAAA	NM_004173	RefSeq	chr22	-	21028717	21032558	SLC7A4	6545	solute carrier family 7, member 4	GO:0006520|GO:0015802|GO:0006810|GO:0015174|GO:0016021|GO:0003333	.	NA	-	.	NA	NA	NA	NA	NA	NA	NA	NA	NA
LNCV6_143652_PI430048170	0.00243968	3.47903	11.7943	11.7254	11.6711	P	P	P	9.75426	9.85569	10.1566	P	P	P	LNCV6_143652_PI430048170	mRNA	GACAACTACTGGAGAGTCATGTTTGTTGAAATTCTCATTAATGTTTATGGGTGTTTTCTG	NM_000601	RefSeq	chr7	-	81702127	81770136	HGF	3082	hepatocyte growth factor (hepapoietin A; scatter factor), transcript variant 1	GO:0005515|GO:0004252|GO:2000573|GO:0031100|GO:0050731|GO:0001837|GO:0005615|GO:0042802|GO:0000187|GO:0090201|GO:0060665|GO:0070572|GO:0045944|GO:0035729|GO:0006508|GO:0031093|GO:0043154|GO:0031643|GO:0048012|GO:0030335|GO:0046982|GO:0030168|GO:0014068|GO	.	NA	-	.	NA	NA	NA	NA	NA	NA	NA	NA	NA
LNCV6_127694_PI430048170	0.0094906	0.181356	0.883583	0.697997	1.5791	A	A	A	3.66051	3.50764	3.53286	P	P	P	LNCV6_127694_PI430048170	mRNA	CAATGTGAAGATGGCATTTCAGTGTTTATTTCTGGATCTATGAGTTACTTTAGCAGAGTT	NM_032511	RefSeq	chr6	-	99272916	99349655	FAXC	84553	failed axon connections homolog (Drosophila)	GO:0016021	.	NA	-	.	NA	NA	NA	NA	NA	NA	NA	NA	NA
LNCV6_106664_PI430048170	2.61325e-06	0.0717889	4.2417	4.06568	4.0071	P	P	P	7.98721	7.95508	7.77388	P	P	P	LNCV6_106664_PI430048170	mRNA	GAGTCATTTAAGGCTGCAAGCAGTATTTACAACAGAGGGTACAAGTTCTATCTGAAAAAA	NM_001024630	RefSeq	chr6	+	45328316	45551082	RUNX2	860	runt-related transcription factor 2, transcript variant 1	GO:0071773|GO:0005515|GO:0010467|GO:0000790|GO:0008284|GO:0003700|GO:0006367|GO:0045879|GO:0048701|GO:0005737|GO:0002063|GO:0070491|GO:0042475|GO:0048469|GO:0032332|GO:0005667|GO:0019904|GO:0002051|GO:0043425|GO:0030509|GO:0000978|GO:0000979|GO:0005524|GO	.	NA	-	.	NA	NA	NA	NA	NA	NA	NA	NA	NA
LNCV6_127821_PI430048170	0.00173164	0.458493	7.80324	7.80276	7.5442	P	P	P	8.90092	8.86761	8.76864	P	P	P	LNCV6_127821_PI430048170	mRNA	GGCCAGTCAGTTGTACAGAAGTTGGAATATTCTGTTCCAGAATTAAAGAAGTTTTTAGAT	NM_014951	RefSeq	chr10	+	62374156	62402458	ZNF365	22891	zinc finger protein 365, transcript variant A	GO:0005515|GO:0005737|GO:0005815	.	NA	-	.	NA	NA	NA	NA	NA	NA	NA	NA	NA
LNCV6_130187_PI430048170	0.00121967	0.261173	2.00709	2.35148	1.84873	A	A	A	4.08238	4.25492	3.66564	P	P	P	LNCV6_130187_PI430048170	mRNA	CTTTAGCCGTGTAAGGGGTTCACAGATGTTCATACTTTTGTTCTTTATACCTTATATGTA	NM_144682	RefSeq	chr17	-	35435095	35448837	SLFN13	146857	schlafen family member 13	GO:0005622|GO:0005524	.	NA	-	.	NA	NA	NA	NA	NA	NA	NA	NA	NA
LNCV6_126496_PI430048170	0.000684835	34.3348	8.75667	8.49334	8.23894	P	P	P	3.30264	2.84986	3.88906	P	P	P	LNCV6_126496_PI430048170	mRNA	AGGGTCTGAGAACTGTCAGCCTTTTGCCATTCAAAAACATTTATGTCCAACCTGAAAAAA	NM_001146312	RefSeq	chr17	+	12665889	12768948	MYOCD	93649	myocardin, transcript variant 1	GO:0005515|GO:0006366|GO:0055012|GO:0010832|GO:0045661|GO:1900222|GO:0001560|GO:0051152|GO:0061049|GO:2001015|GO:0010667|GO:0055007|GO:0035035|GO:0048286|GO:0051150|GO:2000721|GO:0003713|GO:2000724|GO:0000122|GO:2000727|GO:0043388|GO:0045893|GO:0003231|GO	.	NA	-	.	NA	NA	NA	NA	NA	NA	NA	NA	NA
LNCV6_130310_PI430048170	0.000213813	3.88027	10.3158	10.1278	10.0562	P	P	P	8.32845	8.29828	7.99424	P	P	P	LNCV6_130310_PI430048170	mRNA	GCGACGAGAATGCAGAAGTCAGTAACATGTGCATGTTTGTTGTGCTCCTTTTTTCTGTTG	NM_144717	RefSeq	chr3	+	136957864	137011084	IL20RB	53833	interleukin 20 receptor beta	GO:0002437|GO:0032703|GO:0032753|GO:0004896|GO:0005886|GO:0032733|GO:0019221|GO:0001808|GO:0042130|GO:0048873|GO:0042015|GO:0002765|GO:0016021|GO:0032689	.	NA	-	.	NA	NA	NA	NA	NA	NA	NA	NA	NA
LNCV6_144623_PI430048170	0.000506814	5.76109	7.29989	7.26424	7.11887	P	P	P	4.82885	4.80225	4.44891	P	P	P	LNCV6_144623_PI430048170	mRNA	ATGCATCTGTGTGAGCAGATGATCATTGTATTACCTTTTATCGGTAGTAAGCTTGGAAAA	NM_033393	RefSeq	chr4	+	152942982	152979696	FHDC1	85462	FH2 domain containing 1	NA	.	NA	-	.	NA	NA	NA	NA	NA	NA	NA	NA	NA
LNCV6_128772_PI430048170	8.63801e-07	0.0100821	0.211673	0.300008	0.319458	A	A	A	6.90748	7.00516	6.81038	P	P	P	LNCV6_128772_PI430048170	mRNA	GACAAGAAGTTCCATTTGATGTCAATAAAGCAAAGTACTTGCCTACTTTTTTGAAGCTGA	NM_020639	RefSeq	chr21	-	41739368	41767089	RIPK4	54101	receptor-interacting serine-threonine kinase 4	GO:0005515|GO:0005737|GO:0051092|GO:0016020|GO:0004674|GO:0006468|GO:0005634|GO:0005524|GO:0002009	.	NA	-	.	NA	NA	NA	NA	NA	NA	NA	NA	NA
LNCV6_140058_PI430048170	0.000794919	0.452262	6.62549	6.70572	6.40878	P	P	P	7.8594	7.75678	7.55815	P	P	P	LNCV6_140058_PI430048170	mRNA	GGAAATGCGAAGTAGTTGCTATAGCAAGAATTGGGAACTGGGATATAAGTCATAATATTA	NM_024408	RefSeq	chr1	-	119911552	120069703	NOTCH2	4853	notch 2, transcript variant 1	GO:0005515|GO:0010467|GO:0007220|GO:0006367|GO:0060674|GO:0003184|GO:0046579|GO:0007219|GO:0046849|GO:0009887|GO:0042742|GO:0009986|GO:0001709|GO:0005509|GO:0007275|GO:0000122|GO:0001701|GO:0043235|GO:0005929|GO:0005887|GO:0005789|GO:0016049|GO:0005654|GO	.	NA	-	.	NA	NA	NA	NA	NA	NA	NA	NA	NA
LNCV6_141931_PI430048170	1.99826e-05	0.193599	8.15179	8.16634	8.05117	P	P	P	10.3879	10.4966	10.5871	P	P	P	LNCV6_141931_PI430048170	mRNA	AGGCCATAGGGCATAATTTGCATCTCAAATCTGAGAATAAACTGATGAACTGTGAAAAAA	NM_015719	RefSeq	chr19	-	9959560	10010471	COL5A3	50509	collagen, type V, alpha 3	GO:0005518|GO:0043394|GO:0005576|GO:0005588|GO:0007160|GO:0022617|GO:0007411|GO:0030198|GO:0030199|GO:0030574|GO:0005788|GO:0043588|GO:0008201|GO:0070062|GO:0005201	.	NA	-	.	NA	NA	NA	NA	NA	NA	NA	NA	NA
LNCV6_120208_PI430048170	0.000371194	2.04239	7.60175	7.68503	7.66455	P	P	P	6.71225	6.54318	6.60129	P	P	P	LNCV6_120208_PI430048170	mRNA	AGCTACTAGTTTTTATCCCTAGACCTTCTCTGCTCCAGTGTCTTGTTCATGTGTCCTGAC	NM_033141	RefSeq	chr14	-	70722525	70809171	MAP3K9	4293	mitogen-activated protein kinase kinase kinase 9, transcript variant 1	GO:0005515|GO:0006355|GO:0043065|GO:0006915|GO:0018108|GO:0007256|GO:0005575|GO:0007257|GO:0005524|GO:0042803|GO:0006351|GO:0004706|GO:0046777|GO:0004674|GO:0006468|GO:0004713|GO:0004708	.	NA	-	.	NA	NA	NA	NA	NA	NA	NA	NA	NA
LNCV6_137373_PI430048170	1.66017e-05	0.19164	6.21628	6.11774	6.08266	P	P	P	8.42001	8.51741	8.62584	P	P	P	LNCV6_137373_PI430048170	mRNA	TACATCACCTTCTCAGCTCTTGACCTCAGAAAGTATCCAAACCAAGGAGGAGAAACCTGT	NM_016341	RefSeq	chr10	+	93993988	94328391	PLCE1	51196	phospholipase C, epsilon 1, transcript variant 1	GO:0045859|GO:0005515|GO:0019722|GO:0043647|GO:0005886|GO:0008283|GO:0007200|GO:0007265|GO:0046578|GO:0044281|GO:0006940|GO:0001558|GO:0007204|GO:0032835|GO:0007205|GO:0005829|GO:0005085|GO:0007507|GO:0004629|GO:0000187|GO:0005737|GO:0007173|GO:0007010|GO	.	NA	-	.	NA	NA	NA	NA	NA	NA	NA	NA	NA
LNCV6_142649_PI430048170	0.00263591	0.0996169	0.0995102	0.113911	0.118252	A	A	A	3.36775	3.73527	3.14959	P	P	P	LNCV6_142649_PI430048170	mRNA	ATCAGCAATAGTGCATTGGTGGACAAGACAGACAAGACGCAGACAATGAAAACCCCTAAG	NM_144702	RefSeq	chr1	+	156920631	156933088	LRRC71	149499	leucine rich repeat containing 71	NA	.	NA	-	.	NA	NA	NA	NA	NA	NA	NA	NA	NA
LNCV6_140028_PI430048170	0.004843	2.48585	14.0622	13.8956	13.6461	P	P	P	12.5272	12.6401	12.5223	P	P	P	LNCV6_140028_PI430048170	mRNA	GCCACTTACCCAAGCTTTAGAGAATCCCTAGTGGAAGATTATATGATAAACTTTCAGTCC	NM_001254738	RefSeq	chr2	-	150468192	150487695	RND3	390	Rho family GTPase 3, transcript variant 1	GO:0005515|GO:0030036|GO:0000139|GO:0007264|GO:0008152|GO:0003924|GO:0007155|GO:0005525|GO:0005925|GO:0070062	.	NA	-	.	NA	NA	NA	NA	NA	NA	NA	NA	NA
LNCV6_134921_PI430048170	0.00269132	0.0133648	1.69719	0.777365	0.257284	A	A	A	7.34617	7.3816	7.03163	P	P	P	LNCV6_134921_PI430048170	mRNA	CCCTATCCCTTGTCGATGACAGTCATCCTAATGATAATAAAACCTGCATCCAGATAATCA	NM_007117	RefSeq	chr3	+	129974392	129977938	TRH	7200	thyrotropin-releasing hormone	GO:0051412|GO:0001666|GO:0005886|GO:0045471|GO:0014050|GO:0009409|GO:2000252|GO:0007267|GO:0005576|GO:0005634|GO:0014054|GO:0009749|GO:0007165|GO:0001692|GO:0009755|GO:0007628|GO:0042755|GO:0032024|GO:0008437|GO:0030141|GO:0005184	.	NA	-	.	NA	NA	NA	NA	NA	NA	NA	NA	NA
LNCV6_144596_PI430048170	6.4394e-06	0.375617	5.21666	5.31907	5.26959	P	P	P	6.70628	6.61557	6.72104	P	P	P	LNCV6_144596_PI430048170	mRNA	GGTGGAGAGAATAAAGAACCATTGCACATCTTACATCCACAGTAATGAGTCATAATATTA	NM_182985	RefSeq	chr15_KI270849v1_alt	+	59738	91200	TRIM69	140691	tripartite motif containing 69, transcript variant a	GO:0005737|GO:0004842|GO:0016567|GO:0016607|GO:0005886|GO:0016874|GO:0006915|GO:0008270|GO:0005634	.	NA	-	.	NA	NA	NA	NA	NA	NA	NA	NA	NA
LNCV6_143214_PI430048170	0.0307972	0.100206	1.99292	0.336046	2.7558	A	A	A	5.53889	5.40847	4.94291	P	P	P	LNCV6_143214_PI430048170	mRNA	GTGCAGAAATATTGACAAATGCTGGCCAGCTTTATCTTCCTATATCCTTCATTAAAAGTA	NM_144969	RefSeq	chrX	-	75368426	75523502	ZDHHC15	158866	zinc finger, DHHC-type containing 15, transcript variant 1	GO:0018345|GO:0005794|GO:0016188|GO:0016409|GO:0008270|GO:0016021|GO:0019706|GO:0070062|GO:0045184	.	NA	-	.	NA	NA	NA	NA	NA	NA	NA	NA	NA
LNCV6_137056_PI430048170	0.000172669	32.7992	10.127	9.91728	9.98471	P	P	P	5.11393	5.10901	4.66239	P	P	P	LNCV6_137056_PI430048170	mRNA	TTTACCTATTGCTGTAAGAAATGACGATCCCCTTCCCATTAAAGAGAGTGCGTTGACCCC	NM_001166175	RefSeq	chr5	-	173232103	173235312	NKX2-5	1482	NK2 homeobox 5, transcript variant 2	GO:0005515|GO:0003700|GO:0001190|GO:0006366|GO:0044212|GO:0003705|GO:0003285|GO:0003350|GO:0010736|GO:0010735|GO:0010832|GO:0030878|GO:0048536|GO:0030154|GO:0042803|GO:0007512|GO:0001947|GO:0010765|GO:0010667|GO:0055005|GO:0055007|GO:0055008|GO:0045823|GO	.	NA	-	.	NA	NA	NA	NA	NA	NA	NA	NA	NA
LNCV6_131021_PI430048170	0.000121406	5.06427	5.90326	5.79666	5.69832	P	P	P	3.26458	3.56849	3.53269	P	P	P	LNCV6_131021_PI430048170	mRNA	TCACCTGGAGAGAGAGAGGGAAAGCTGTGCCAGAAATAAATGGTTATTGAGGTCAAAAAA	NM_001164458	RefSeq	chr7	-	150247211	150323669	ACTR3C	653857	ARP3 actin-related protein 3 homolog C (yeast), transcript variant 1	GO:0034314|GO:0008150|GO:0003674|GO:0005885|GO:0003779|GO:0005524|GO:0070062	.	NA	-	.	NA	NA	NA	NA	NA	NA	NA	NA	NA
LNCV6_137263_PI430048170	0.00060685	0.370765	8.04279	8.04795	7.80933	P	P	P	9.34681	9.24094	9.59587	P	P	P	LNCV6_137263_PI430048170	mRNA	ACCAGGAAAAGAAAAAATACATCATGCTGGAAATAAAGCTGCGGAACTCTGAACGGGCGC	NM_001256024	RefSeq	chr10	-	48446024	48605131	ARHGAP22	58504	Rho GTPase activating protein 22, transcript variant 1	GO:0043547|GO:0005515|GO:0051056|GO:0006355|GO:0007264|GO:0005634|GO:0001525|GO:0005925|GO:0030154|GO:0006351|GO:0005829|GO:0005096	.	NA	-	.	NA	NA	NA	NA	NA	NA	NA	NA	NA
LNCV6_133329_PI430048170	0.000239786	2.08599	6.59386	6.50903	6.41624	P	P	P	5.3992	5.36703	5.56798	P	P	P	LNCV6_133329_PI430048170	mRNA	AACATGATTTTAAATTATGTGCCTTTACTGCAGCTTTCTTGCTCTCTTTGTGTGTGTGCA	NM_001304944	RefSeq	chr12	+	49346916	49353684	DNAJC22	79962	DnaJ (Hsp40) homolog, subfamily C, member 22, transcript variant 1	GO:0042026|GO:0051087|GO:0051082|GO:0016021	.	NA	-	.	NA	NA	NA	NA	NA	NA	NA	NA	NA
LNCV6_129080_PI430048170	0.00238227	2.01276	4.61103	4.4239	4.69774	P	P	P	3.78291	3.46044	3.44978	P	P	P	LNCV6_129080_PI430048170	mRNA	AACAAATGGCTGCCTTCTGGTGTTTTTATTCTATTTCATCTCATTAACACTACAACCTTG	NM_002010	RefSeq	chr13	+	21671075	21704501	FGF9	2254	fibroblast growth factor 9	GO:0060045|GO:0008286|GO:0030949|GO:0008284|GO:0090263|GO:0048706|GO:0007267|GO:0030178|GO:0030326|GO:0006606|GO:0005615|GO:0045880|GO:0005737|GO:0007173|GO:0002062|GO:0030238|GO:0051781|GO:0008201|GO:0070062|GO:0050679|GO:0048505|GO:0048011|GO:0042472|GO	.	NA	-	.	NA	NA	NA	NA	NA	NA	NA	NA	NA
LNCV6_140927_PI430048170	0.00114383	0.179933	3.99059	3.60621	3.69434	P	P	P	6.23936	6.30667	6.19497	P	P	P	LNCV6_140927_PI430048170	mRNA	AAACTTTCCCCAACGTGCGGGAGATGTTCAACTCCCACCGGCTGGGGATTGAGAACTCGA	NM_005251	RefSeq	chr16	+	86567250	86568931	FOXC2	2303	forkhead box C2	GO:0072011|GO:0001656|GO:0008286|GO:0072112|GO:0001657|GO:0003700|GO:0055010|GO:0044212|GO:0006366|GO:0003705|GO:0001756|GO:0048844|GO:0005634|GO:0048703|GO:0007507|GO:0001946|GO:0050880|GO:0007219|GO:0014032|GO:0045944|GO:0030199|GO:0090050|GO:0043010|GO	.	NA	-	.	NA	NA	NA	NA	NA	NA	NA	NA	NA
LNCV6_137099_PI430048170	0.00960515	0.459472	5.71995	6.11173	5.86304	P	P	P	7.0455	7.03326	7.0091	P	P	P	LNCV6_137099_PI430048170	mRNA	GTAAGGGTGGGGGTTGAAAGTTGTTATCTTTAAATACATGTACAAATCGTTGTCAAAAGT	NM_014859	RefSeq	chr17	+	12789511	12991643	ARHGAP44	9912	Rho GTPase activating protein 44	GO:0005515|GO:0051056|GO:0031256|GO:0030054|GO:0007264|GO:0045202|GO:0006887|GO:0005829|GO:0043547|GO:0005543|GO:0043197|GO:0055037|GO:0005096	.	NA	-	.	NA	NA	NA	NA	NA	NA	NA	NA	NA
LNCV6_127865_PI430048170	0.000242343	0.254351	8.16481	7.9546	8.02951	P	P	P	9.89023	9.95509	10.2159	P	P	P	LNCV6_127865_PI430048170	mRNA	TGCCCAGCCAAATCTTAATGTAAAGTAGCTAGAGCCATGGAAGTACAGTATGAATTAAAA	NM_001286563	RefSeq	chr11	+	123525635	123627771	GRAMD1B	57476	GRAM domain containing 1B, transcript variant 1	GO:0016020|GO:0016021	.	NA	-	.	NA	NA	NA	NA	NA	NA	NA	NA	NA
LNCV6_136626_PI430048170	0.000647922	3.23395	9.66649	9.65863	9.44555	P	P	P	7.94487	7.89845	7.85682	P	P	P	LNCV6_136626_PI430048170	mRNA	CACTGAAATGAGAACTCTAGATGTAACTCTATTCAAATAAACCTTCGTGAGACATTCATG	NM_020909	RefSeq	chr2	+	120013027	120179121	EPB41L5	57669	erythrocyte membrane protein band 4.1 like 5, transcript variant 1	GO:0008092|GO:0032091|GO:0005886|GO:0010718|GO:0071560|GO:0001839|GO:0031032|GO:0005634|GO:0070986|GO:0001837|GO:0051894|GO:0032092|GO:0006931|GO:0005737|GO:0032525|GO:0007509|GO:0070201|GO:0005856|GO:0048319|GO:0003383|GO:0048339|GO:0022408|GO:0019904|GO	.	NA	-	.	NA	NA	NA	NA	NA	NA	NA	NA	NA
LNCV6_127814_PI430048170	0.0354153	2.70236	5.54095	6.43047	6.23632	P	P	P	4.71571	4.65761	4.67398	P	P	P	LNCV6_127814_PI430048170	mRNA	TATTAATTGTGCAAGCTTTTCCTAATAAACGTGGAGAATCACAGGCTGGGCTGGGCACTG	NM_000218	RefSeq	chr11_KI270831v1_alt	+	1030	81275	KCNQ1	3784	potassium channel, voltage gated KQT-like subfamily Q, member 1, transcript variant 1	GO:0005515|GO:0005251|GO:0034236|GO:0005516|GO:0034237|GO:0005886|GO:0007605|GO:0008016|GO:0060306|GO:0007268|GO:0016458|GO:0060307|GO:0086091|GO:0005764|GO:0060048|GO:0071435|GO:0016323|GO:0086008|GO:0060372|GO:0086089|GO:0060452|GO:0008076|GO:0005249|GO	.	NA	-	.	NA	NA	NA	NA	NA	NA	NA	NA	NA
LNCV6_143473_PI430048170	0.000685546	2.83795	12.1993	11.9287	11.8992	P	P	P	10.3965	10.372	10.7344	P	P	P	LNCV6_143473_PI430048170	mRNA	AGCACGTTTCCACCAGCTGTATTCAACACTACAATGCATTTTTTAAACTATATTTGCATC	NM_014938	RefSeq	chr12	+	122078727	122147347	MLXIP	22877	MLX interacting protein	GO:0003700|GO:0006357|GO:0046983|GO:1900402|GO:0005741|GO:0005634|GO:0003677|GO:0006351|GO:0006913	.	NA	-	.	NA	NA	NA	NA	NA	NA	NA	NA	NA
LNCV6_144161_PI430048170	0.0174667	0.0369087	2.47822	0.115918	0.750892	A	A	A	6.28842	6.07007	6.33228	P	P	P	LNCV6_144161_PI430048170	mRNA	CTGTAGAGGTGAGGTTTTGTTTTTAGTTGTTCTACTGATTATATCCTTTTCTGAGCTATG	NM_033104	RefSeq	chr14	-	81260649	81427212	STON2	85439	stonin 2, transcript variant 1	GO:0005515|GO:0043005|GO:0030131|GO:0005737|GO:0030054|GO:0030100|GO:0002244|GO:0030136|GO:0005730|GO:0048488|GO:0006886|GO:0008021	.	NA	-	.	NA	NA	NA	NA	NA	NA	NA	NA	NA
LNCV6_130795_PI430048170	0.000163226	4.29856	9.6713	9.91882	9.84014	P	P	P	7.69882	7.65342	7.77482	P	P	P	LNCV6_130795_PI430048170	mRNA	TGTGAAGCAGATGTTTTTGTCCGGAAATAAAAATAATAGTCTTGGAGTCTCGCCACCAAA	NM_022842	RefSeq	chr3	-	45082273	45146422	CDCP1	64866	CUB domain containing protein 1, transcript variant 1	GO:0005886|GO:0005576|GO:0016021	.	NA	-	.	NA	NA	NA	NA	NA	NA	NA	NA	NA
LNCV6_92396_PI430048170	0.000796196	0.388026	7.60337	7.4461	7.32305	P	P	P	8.6693	8.75975	9.02973	P	P	P	LNCV6_92396_PI430048170	mRNA	TTGTCAAATTTCATCAGCTATGAAACCCACGTAGTCGAACACCGTGATGCTTCTCCTGCA	NM_001042481	RefSeq	chr14	+	51489120	51730726	FRMD6	122786	FERM domain containing 6, transcript variant 1	GO:0043296|GO:0003383|GO:0005737|GO:0032970|GO:0005886|GO:0034613|GO:0005856	.	NA	-	.	NA	NA	NA	NA	NA	NA	NA	NA	NA
LNCV6_133543_PI430048170	0.000351505	2.43008	10.3609	10.3317	10.1666	P	P	P	9.03314	9.12677	8.8503	P	P	P	LNCV6_133543_PI430048170	mRNA	CGTGAAAACACATTTGCTTTTTGTGATATGCACAATGTAGATAAGTGTTCTGTCTGACTT	NM_021111	RefSeq	chr9	+	36036912	36124455	RECK	8434	reversion-inducing-cysteine-rich protein with kazal motifs	GO:0010951|GO:0005515|GO:0016020|GO:0005886|GO:0004866|GO:0030198|GO:0007566|GO:0004867|GO:0008191|GO:0031225|GO:0001955	.	NA	-	.	NA	NA	NA	NA	NA	NA	NA	NA	NA
LNCV6_130787_PI430048170	0.00139956	0.466797	12.5875	12.4108	12.4385	P	P	P	13.5844	13.5529	13.6027	P	P	P	LNCV6_130787_PI430048170	mRNA	CGTCCTCCTGGGGTGGACCCTAGTTTAATAAAGATTCACCAAGTTTCACGCATCAAAAAA	NM_001302688	RefSeq	chr19	+	44905748	44909395	APOE	348	apolipoprotein E, transcript variant 1	GO:0005515|GO:0010468|GO:0006707|GO:0007603|GO:0005764|GO:0002021|GO:0005615|GO:0034361|GO:0034365|GO:0034364|GO:0034363|GO:0034362|GO:0019433|GO:0034447|GO:0033344|GO:0032868|GO:0005794|GO:0016209|GO:0007568|GO:0031232|GO:0006898|GO:0007271|GO:0034372|GO	.	NA	-	.	NA	NA	NA	NA	NA	NA	NA	NA	NA
LNCV6_138734_PI430048170	0.00181576	2.09467	7.06367	6.77574	6.90852	P	P	P	5.79539	5.92659	5.83708	P	P	P	LNCV6_138734_PI430048170	mRNA	TGTTACCACAGATTCCCTTGTGTCCGGAGAGATTCCCTAGCTCTAATGACAGCTTTTTTG	NM_003601	RefSeq	chr4	+	143513462	143557489	SMARCA5	8467	SWI/SNF related, matrix associated, actin dependent regulator of chromatin, subfamily a, member 5	GO:0005515|GO:0000793|GO:0010467|GO:0005634|GO:0006302|GO:0042393|GO:0000183|GO:0016584|GO:0006338|GO:0016589|GO:0043596|GO:0016887|GO:0006352|GO:0006357|GO:0043044|GO:0006334|GO:0005730|GO:0004386|GO:0031491|GO:0031213|GO:0005524|GO:0003677|GO:0034080|GO	.	NA	-	.	NA	NA	NA	NA	NA	NA	NA	NA	NA
LNCV6_111412_PI430048170	0.0131057	2.74394	4.70172	4.28502	4.47706	P	P	P	3.38011	2.54317	3.08144	P	P	P	LNCV6_111412_PI430048170	mRNA	AAGATGCATCCATTAGTCTAGAGCCAGATTTGGACAATAGTGGTTCTAATACAGTGTCCA	NM_153610	RefSeq	chr5	+	79689835	79800226	CMYA5	202333	cardiomyopathy associated 5	GO:0005515|GO:0048471|GO:0032513|GO:0043034|GO:0014733|GO:0070885|GO:0031430|GO:0042802	.	NA	-	.	NA	NA	NA	NA	NA	NA	NA	NA	NA
LNCV6_138822_PI430048170	4.10709e-06	21.4527	9.94121	9.72634	9.67319	P	P	P	5.53962	5.25328	5.27478	P	P	P	LNCV6_138822_PI430048170	mRNA	CCTGGGTTTCTCTTACTCAATCCCTGGAGTGTAAGCATTTGGATTGTGTCACAGATTACC	NM_024709	RefSeq	chr1	+	220690285	220699157	C1orf115	79762	chromosome 1 open reading frame 115	GO:0016021	.	NA	-	.	NA	NA	NA	NA	NA	NA	NA	NA	NA
LNCV6_143693_PI430048170	0.000935001	0.0419135	4.42902	4.41488	3.95425	P	P	P	8.87601	8.8857	8.81333	P	P	P	LNCV6_143693_PI430048170	mRNA	ACTTAATCTGACTGCAGTAACTAGTACAGTTCAATAAAGGGAATCCATGCGATTAGCAAA	NM_001271620	RefSeq	chr16	-	49490603	49857919	ZNF423	23090	zinc finger protein 423, transcript variant 2	GO:0005515|GO:0030513|GO:0007219|GO:0005634|GO:0045893|GO:0045892|GO:0003677|GO:0046872|GO:0030154|GO:0006351|GO:0007399	.	NA	-	.	NA	NA	NA	NA	NA	NA	NA	NA	NA
LNCV6_144389_PI430048170	0.00121297	0.332337	11.1727	10.84	10.814	P	P	P	12.4813	12.4786	12.6559	P	P	P	LNCV6_144389_PI430048170	mRNA	CACGTCAGTTACACATTAAAGCCAGACCCCATGATAAAATTCCACAAAATGGAAATAAAA	NM_002959	RefSeq	chr1	-	109309565	109397941	SORT1	6272	sortilin 1, transcript variant 1	GO:0005515|GO:0008625|GO:0010468|GO:0048471|GO:0005886|GO:0010465|GO:0030136|GO:0048227|GO:0005765|GO:0016050|GO:0030379|GO:0046323|GO:0007218|GO:0032580|GO:0032509|GO:0030140|GO:0032868|GO:0048011|GO:0031965|GO:0014902|GO:0005794|GO:0048406|GO:0009986|GO	.	NA	-	.	NA	NA	NA	NA	NA	NA	NA	NA	NA
LNCV6_129025_PI430048170	0.0074293	0.477918	9.57531	9.44581	9.204	P	P	P	10.5297	10.4737	10.4401	P	P	P	LNCV6_129025_PI430048170	mRNA	GAGAATTTATGGACGTTGTAGAAATGTACAAATGCATTTCCAAACTGCCTTAAACGTTGT	NM_002048	RefSeq	chr9	-	86944361	86947189	GAS1	2619	growth arrest-specific 1	GO:0005515|GO:0035924|GO:0030308|GO:0005886|GO:0060628|GO:0050680|GO:0048592|GO:0045879|GO:0048701|GO:0045880|GO:0048589|GO:0007411|GO:2001240|GO:0042476|GO:0060021|GO:0021904|GO:0007050|GO:0042474|GO:0043010|GO:0042473|GO:0046658|GO:0050679|GO:0021587|GO	.	NA	-	.	NA	NA	NA	NA	NA	NA	NA	NA	NA
LNCV6_102887_PI430048170	0.00648733	0.455079	8.92388	8.97705	8.59798	P	P	P	10.036	9.98554	9.91048	P	P	P	LNCV6_102887_PI430048170	mRNA	AAGGAATGTTATCAGTATTAAGCTAATGGTCCTGTTATGTCATTGTGTTTGTGTGCTGTT	NM_005025	RefSeq	chr3	+	167735722	167825569	SERPINI1	5274	serpin peptidase inhibitor, clade I (neuroserpin), member 1, transcript variant 1	GO:0010951|GO:0004867|GO:0007422|GO:0007417|GO:0030155|GO:0005615|GO:0070062	.	NA	-	.	NA	NA	NA	NA	NA	NA	NA	NA	NA
LNCV6_128983_PI430048170	1.20224e-06	0.00627054	0.122277	0.16836	0.231974	A	A	A	7.44521	7.60572	7.41817	P	P	P	LNCV6_128983_PI430048170	mRNA	GGCAGCATTTCATTTGTAAAGCACTTGGGTAACCCTTTGTTCTTGCAATAACAATATTAT	NM_001011709	RefSeq	chr10	+	116427911	116477956	PNLIPRP3	NA	pancreatic lipase-related protein 3	NA	.	NA	-	.	NA	NA	NA	NA	NA	NA	NA	NA	NA
LNCV6_143239_PI430048170	0.0017671	0.271517	3.90824	3.26965	3.69505	P	P	P	5.4001	5.35103	5.79376	P	P	P	LNCV6_143239_PI430048170	mRNA	TGCTGTTGGTGAATAAATCAGTCTACTGGAACTCCAAGGACTGGATGTAAGCAGATCTTT	NM_014037	RefSeq	chr19	-	49289634	49325217	SLC6A16	28968	solute carrier family 6, member 16	GO:0005622|GO:0005328|GO:0005326|GO:0006836|GO:0016021|GO:0055085	.	NA	-	.	NA	NA	NA	NA	NA	NA	NA	NA	NA
LNCV6_145364_PI430048170	0.000285831	2.54312	11.3581	11.1691	11.1167	P	P	P	9.96019	9.84848	9.80213	P	P	P	LNCV6_145364_PI430048170	mRNA	GGACTACCAGGAAATACTAGACTCTCCCATTAAATGAATACCTGATTATTATTGTCTCAT	NM_025246	RefSeq	chr3	+	136819018	136855892	SLC35G2	80723	solute carrier family 35, member G2, transcript variant 1	GO:0005794|GO:0005886|GO:0005887	.	NA	-	.	NA	NA	NA	NA	NA	NA	NA	NA	NA
LNCV6_144318_PI430048170	1.88621e-05	10.528	9.65535	9.43205	9.40663	P	P	P	6.12853	6.01094	6.17438	P	P	P	LNCV6_144318_PI430048170	mRNA	GGCCAGTCTTACATGCTTATGAGTCTACTTTCCAATAAATTTACTCATAGTCCATTAACT	NM_153366	RefSeq	chr9	-	110365248	110579880	SVEP1	79987	sushi, von Willebrand factor type A, EGF and pentraxin domain containing 1	GO:0005737|GO:0016020|GO:0005509|GO:0005576|GO:0007155	.	NA	-	.	NA	NA	NA	NA	NA	NA	NA	NA	NA
LNCV6_130362_PI430048170	0.00124851	2.25943	11.6699	11.4884	11.3177	P	P	P	10.3502	10.4201	10.1898	P	P	P	LNCV6_130362_PI430048170	mRNA	CGGATAGATTGAGATGTTCTTTCACATCAGATGATCTGTAACACTGTAAGATACTGATCT	NM_001206	RefSeq	chr9	-	70384596	70414657	KLF9	687	Kruppel-like factor 9	GO:0010839|GO:0050847|GO:0097067|GO:0003700|GO:0005886|GO:0006357|GO:0007566|GO:0005634|GO:0003677|GO:0006351|GO:0046872|GO:0071387|GO:0005737|GO:0007623|GO:0005654	.	NA	-	.	NA	NA	NA	NA	NA	NA	NA	NA	NA
LNCV6_135504_PI430048170	0.00704947	16.9649	4.77947	5.07525	4.64503	P	P	P	0.141204	1.49795	0.206283	A	A	A	LNCV6_135504_PI430048170	mRNA	GAAGGAAGAGTCCATTTCTAATCAAATAATTCGCCTGTTTTACTAGCTTATAGTGATCTG	NM_024761	RefSeq	chr9	-	27325208	27529852	MOB3B	79817	MOB kinase activator 3B	GO:0005515|GO:0046872	.	NA	-	.	NA	NA	NA	NA	NA	NA	NA	NA	NA
LNCV6_136880_PI430048170	5.91981e-05	0.376265	4.94152	4.7907	4.95165	P	P	P	6.25049	6.41994	6.2425	P	P	P	LNCV6_136880_PI430048170	mRNA	GGGTTCATAGAAACCCAATGACTTGATTGTGGCTACTACTCAATAAATAATAGAATTTGG	NM_002160	RefSeq	chr9	-	115019575	115118257	TNC	3371	tenascin C	GO:0008284|GO:0071300|GO:0045471|GO:0071799|GO:0005614|GO:0005615|GO:0071305|GO:0071774|GO:0007528|GO:0030198|GO:0014012|GO:0042475|GO:0007155|GO:0060739|GO:0009611|GO:0060740|GO:0005576|GO:0001649|GO:0009612|GO:0005604|GO:0010628|GO:0031012|GO:0007162|GO	.	NA	-	.	NA	NA	NA	NA	NA	NA	NA	NA	NA
LNCV6_140131_PI430048170	0.00421217	0.377803	6.29213	6.15695	5.94136	P	P	P	7.62597	7.74821	7.19383	P	P	P	LNCV6_140131_PI430048170	mRNA	TTCTGGTAACTCACTCAGTTTATGCTGTGCTAAATATCAATCAAGCCATGTATAAATGTG	NM_005233	RefSeq	chr3	+	89107523	89482134	EPHA3	2042	EPH receptor A3, transcript variant 1	GO:0005515|GO:0048013|GO:0005886|GO:0071300|GO:0010717|GO:0005576|GO:0018108|GO:0051893|GO:0005524|GO:0070507|GO:0005004|GO:0016477|GO:0005887|GO:0007411|GO:0032956|GO:0010976|GO:0032319|GO:0007155|GO:0097156|GO:0097155|GO:0005769	.	NA	-	.	NA	NA	NA	NA	NA	NA	NA	NA	NA
LNCV6_143834_PI430048170	0.000221591	7.45456	9.50847	9.18048	9.07655	P	P	P	6.33361	6.25731	6.50492	P	P	P	LNCV6_143834_PI430048170	mRNA	CATTCTGCAGCGTTTCTCTTTCCCTTGGAAAAGAGAATTTATCATTACTGTTACATTTGT	NM_002090	RefSeq	chr4	-	74036590	74038773	CXCL3	2921	chemokine (C-X-C motif) ligand 3	GO:0008009|GO:0006955|GO:0070098|GO:0006954|GO:0007186|GO:0042127|GO:0030593|GO:0032496|GO:0005576|GO:0045236|GO:0005615|GO:0002690	.	NA	-	.	NA	NA	NA	NA	NA	NA	NA	NA	NA
LNCV6_136335_PI430048170	0.00122279	0.473588	5.1653	5.42824	5.4445	P	P	P	6.4603	6.50603	6.31654	P	P	P	LNCV6_136335_PI430048170	mRNA	GAGGCTCTGCCTAATGTGAATTTATTTATTTGTGAATAAACTGTACTGGTGTCAGTTGGC	NM_018670	RefSeq	chr15	-	89749866	89751309	MESP1	55897	mesoderm posterior basic helix-loop-helix transcription factor 1	GO:0090082|GO:0003700|GO:0003259|GO:0007369|GO:0044212|GO:0003236|GO:0003139|GO:0042662|GO:0005634|GO:0060913|GO:0042664|GO:0003143|GO:0001947|GO:0007219|GO:0008078|GO:0060975|GO:0045944|GO:0046983|GO:0051155|GO:0035481|GO:0045446|GO:0055007|GO:0003241|GO	.	NA	-	.	NA	NA	NA	NA	NA	NA	NA	NA	NA
LNCV6_130366_PI430048170	8.40233e-05	0.270548	9.05992	8.91302	8.76656	P	P	P	10.7001	10.7598	10.9416	P	P	P	LNCV6_130366_PI430048170	mRNA	GTTTCTTCTTTGGAAACCATCACTATTGAGAGATGGGAAAAACCTGAATGTATAAAGCAT	NM_170662	RefSeq	chr3	-	105658264	105869043	CBLB	868	Cbl proto-oncogene B, E3 ubiquitin protein ligase	GO:0005515|GO:0045732|GO:0004842|GO:0016567|GO:0005886|GO:0046642|GO:0016874|GO:0005509|GO:0006607|GO:0050860|GO:0005829|GO:0035556|GO:0007165|GO:0042110|GO:0005737|GO:0006955|GO:0002669|GO:0008270|GO:0001784|GO:0005654|GO:0004871|GO:0007166	.	NA	-	.	NA	NA	NA	NA	NA	NA	NA	NA	NA
LNCV6_141766_PI430048170	0.000357798	5.98361	3.10164	2.92455	2.77202	P	P	P	0.164862	0.220434	0.640482	A	A	A	LNCV6_141766_PI430048170	mRNA	CTTCCTTAGTGTGACATTCCAATCATTTAGTATTTTAGGACCTGTGAATAACTTCCAACA	NM_001004441	RefSeq	chr5	-	80556754	80570485	ANKRD34B	340120	ankyrin repeat domain 34B	GO:0005737|GO:0005634	.	NA	-	.	NA	NA	NA	NA	NA	NA	NA	NA	NA
LNCV6_140291_PI430048170	5.94959e-05	0.264556	6.28059	6.12251	6.09099	P	P	P	8.14508	8.16943	7.93008	P	P	P	LNCV6_140291_PI430048170	mRNA	GGTTTATGGCGATTGTTTTCTTGGACGGATAGTGTAAAATAAACTTCTCTGTTCTCTAAA	NM_020689	RefSeq	chr20	+	19212645	19722897	SLC24A3	57419	solute carrier family 24 (sodium/potassium/calcium exchanger), member 3	GO:0005886|GO:0035725|GO:0006816|GO:0016021|GO:0055085|GO:0006813|GO:0015293|GO:0008273|GO:0006811	.	NA	-	.	NA	NA	NA	NA	NA	NA	NA	NA	NA
LNCV6_136612_PI430048170	0.00648859	2.48675	8.03211	8.05623	8.03367	P	P	P	6.85594	6.79578	6.50358	P	P	P	LNCV6_136612_PI430048170	mRNA	GCCCCTGAGCTGAGCAGAGTCATTATTGGAGAGTTTTGTATTTATTAAAACATTTCTTTT	NM_001304473	RefSeq	chr3	+	184380072	184389835	CHRD	8646	chordin, transcript variant 3	GO:0005515|GO:0030336|GO:0001707|GO:0033504|GO:0021919|GO:0002053|GO:0005615|GO:0001649|GO:0001702|GO:0045785|GO:0030514|GO:0001501|GO:0045668|GO:0019955|GO:0030900|GO:0045545|GO:0008201	.	NA	-	.	NA	NA	NA	NA	NA	NA	NA	NA	NA
LNCV6_140169_PI430048170	0.0132597	0.459169	11.3883	11.2809	11.1956	P	P	P	12.4959	12.6124	12.079	P	P	P	LNCV6_140169_PI430048170	mRNA	CCTGGGCCACTTTTAAACACTAAACATTTCATTTATCCTCTAAGCTAAAATGGTGCTGAG	NM_002317	RefSeq	chr5	-	122063194	122078360	LOX	4015	lysyl oxidase, transcript variant 1	GO:0005515|GO:0005581|GO:0001568|GO:0005507|GO:0030324|GO:0042493|GO:0004720|GO:0005578|GO:0005576|GO:0005634|GO:0048545|GO:0005615|GO:0030198|GO:0030199|GO:0042060|GO:0006464|GO:0055114|GO:0048251	.	NA	-	.	NA	NA	NA	NA	NA	NA	NA	NA	NA
LNCV6_138892_PI430048170	0.00297066	6.70398	6.16281	5.92931	5.99807	P	P	P	3.62828	3.24938	2.89446	P	P	P	LNCV6_138892_PI430048170	mRNA	TTACCTCCTGTCTCAGAAGCTTGTTAGTTATTGTGCCACCTAAATATTGTAATAAAAGTG	NM_000856	RefSeq	chr4	+	155666709	155737062	GUCY1A3	2982	guanylate cyclase 1, soluble, alpha 3, transcript variant 1	GO:0007263|GO:0052565|GO:0008015|GO:0004383|GO:0005525|GO:0060087|GO:0008074|GO:0007596|GO:0006182|GO:0008217|GO:0004872|GO:0030828|GO:0020037	.	NA	-	.	NA	NA	NA	NA	NA	NA	NA	NA	NA
LNCV6_132505_PI430048170	0.00252429	0.445627	7.46847	7.45984	7.40631	P	P	P	8.72352	8.63045	8.46825	P	P	P	LNCV6_132505_PI430048170	mRNA	TATGTTTGTCAGTTCATGCCGAGATGAAATAAATCACGCAGAAAGTGCCAGTCCTCCTGA	NM_014867	RefSeq	chr8_KI270821v1_alt	+	157253	190319	KBTBD11	9920	kelch repeat and BTB (POZ) domain containing 11	NA	.	NA	-	.	NA	NA	NA	NA	NA	NA	NA	NA	NA
LNCV6_143336_PI430048170	4.13085e-05	3.48328	9.63269	9.58873	9.63692	P	P	P	7.88306	7.76486	7.80708	P	P	P	LNCV6_143336_PI430048170	mRNA	GATGGGATGTTCGGATCGGTTTGTAATTAAACCTGGGAATGGCCACAAGAGCACAAAAAA	NM_012435	RefSeq	chr19	-	416582	460996	SHC2	25759	SHC (Src homology 2 domain containing) transforming protein 2	GO:0008286|GO:0005515|GO:0048010|GO:0030971|GO:0000187|GO:0048011|GO:0019901|GO:0005886|GO:0007265|GO:0005575|GO:0007169|GO:0005829	.	NA	-	.	NA	NA	NA	NA	NA	NA	NA	NA	NA
LNCV6_127040_PI430048170	0.0101906	0.405477	2.46069	3.05585	2.81495	A	P	A	4.20363	4.09101	3.99749	P	P	P	LNCV6_127040_PI430048170	mRNA	GGTCCTGAAGGAAATTCTTATAACTCAACATTTGTCTGGTCTTATAAGTAAAGACAGCTT	NM_006952	RefSeq	chr3	+	119173577	119205153	UPK1B	7348	uroplakin 1B	GO:0016324|GO:0005198|GO:0030855|GO:0016021|GO:0070062	.	NA	-	.	NA	NA	NA	NA	NA	NA	NA	NA	NA
LNCV6_132540_PI430048170	0.01085	0.100575	2.6591	2.38388	1.23366	A	A	A	5.514	5.73546	5.28935	P	P	P	LNCV6_132540_PI430048170	mRNA	CAACTATCTTTGTGTATTTTATGACTGTGTGTGTTTGCACTCATTGCAATAAAGTAGGAC	NM_198511	RefSeq	chrX	+	37571568	37677497	LANCL3	347404	LanC lantibiotic synthetase component C-like 3 (bacterial), transcript variant 1	GO:0008152|GO:0003824	.	NA	-	.	NA	NA	NA	NA	NA	NA	NA	NA	NA
LNCV6_53671_PI430048170	0.000150128	0.45138	6.03372	5.93614	5.89743	P	P	P	7.12852	6.99429	7.18413	P	P	P	LNCV6_53671_PI430048170	mRNA	AAGGAGGCGGTCTCACCGAGGTCAGAGGAGCTGAGTAATGAAGGGGACTCCCAGCAGAGC	NM_004672	RefSeq	chr1	-	27355178	27366866	MAP3K6	9064	mitogen-activated protein kinase kinase kinase 6, transcript variant 1	GO:0007165|GO:0005737|GO:0000186|GO:0000287|GO:0006468|GO:0007257|GO:0005524|GO:0004709	.	NA	-	.	NA	NA	NA	NA	NA	NA	NA	NA	NA
LNCV6_137963_PI430048170	0.000292383	3.74025	10.1761	9.80519	9.85361	P	P	P	7.93934	8.22769	7.9695	P	P	P	LNCV6_137963_PI430048170	mRNA	AGCCTGGGACCAGGGCATATTAAAGGCTTTTGGCAGCAAAGTGTCAGTGTTGGCAAAAAA	NM_001002029	RefSeq	chr6_GL000256v2_alt	+	3315983	3336608	C4B	721	complement component 4B (Chido blood group)	GO:0044216|GO:0030449|GO:0001848|GO:0004866|GO:0005886|GO:2000427|GO:0072562|GO:0005576|GO:0005615|GO:0010951|GO:0006956|GO:0006954|GO:0045087|GO:0006958|GO:0030246|GO:0008228|GO:0032490|GO:0070062	.	NA	-	.	NA	NA	NA	NA	NA	NA	NA	NA	NA
LNCV6_144579_PI430048170	0.000484687	164.848	9.18918	8.95009	8.95453	P	P	P	1.49745	1.25818	2.1162	A	A	A	LNCV6_144579_PI430048170	mRNA	AATTAAAGTTGCTTCCATCCAACCTGGAGGCTTCCTAACAAATATCGCAGGCACCAGTGA	NM_002153	RefSeq	chr16	+	82035252	82098534	HSD17B2	3294	hydroxysteroid (17-beta) dehydrogenase 2	GO:0006694|GO:0004303|GO:0047035|GO:0047006|GO:0005789|GO:0032526|GO:0016021|GO:0001890|GO:0001701|GO:0055114	.	NA	-	.	NA	NA	NA	NA	NA	NA	NA	NA	NA
LNCV6_138481_PI430048170	1.79661e-06	21.6829	8.91574	8.81247	8.87264	P	P	P	4.42795	4.34146	4.51278	P	P	P	LNCV6_138481_PI430048170	mRNA	GCTGGAGGAGGACGGCTTACATGTTTGTTTCTGTAGAAAATAAAACTGAGCTACGAAAAA	NM_001327	RefSeq	chrX	-	154617608	154619271	CTAG1B	NA	cancer/testis antigen 1B	NA	.	NA	-	.	NA	NA	NA	NA	NA	NA	NA	NA	NA
LNCV6_141776_PI430048170	0.000229385	13.135	14.2467	14.0214	13.9375	P	P	P	10.3712	10.3049	10.3998	P	P	P	LNCV6_141776_PI430048170	mRNA	GGATCCCCTCGAGACTACTCTGTTACCAGTCATGAAACATTAAAACCTACAAGCCTTAAA	NM_001615	RefSeq	chr2	+	73892965	73919653	ACTG2	72	actin, gamma 2, smooth muscle, enteric, transcript variant 1	GO:0006936|GO:0072562|GO:0005856|GO:0005615|GO:0005524|GO:0071944|GO:0070062|GO:0005829	.	NA	-	.	NA	NA	NA	NA	NA	NA	NA	NA	NA
LNCV6_129769_PI430048170	5.68708e-06	33.9021	9.27264	9.24422	8.91545	P	P	P	4.19624	4.12631	3.86583	P	P	P	LNCV6_129769_PI430048170	mRNA	CAGTGCTCCTGTAAGTCAAATGTGTGCTTTGTACTGCTGTTGTTGAAATTGATGTTACTG	NM_005623	RefSeq	chr17	+	34319046	34321402	CCL8	6355	chemokine (C-C motif) ligand 8	GO:0008009|GO:0006874|GO:0007267|GO:0043085|GO:0009615|GO:0006887|GO:0005615|GO:0007165|GO:0006955|GO:0016004|GO:0004672|GO:0006954|GO:0006935|GO:0060326|GO:0006468|GO:0006816|GO:0008201	.	NA	-	.	NA	NA	NA	NA	NA	NA	NA	NA	NA
LNCV6_139236_PI430048170	0.0310645	0.17919	2.85556	3.14996	1.56354	P	P	A	5.24745	5.15869	5.03188	P	P	P	LNCV6_139236_PI430048170	mRNA	ACTAAGTTCAGTCCAGTCAAGAAAAGAACCTAATAGCACCAATACAAATTGAGGACTTAA	NM_138715	RefSeq	chr8	-	16107877	16192791	MSR1	4481	macrophage scavenger receptor 1, transcript variant SR-AI	GO:0005515|GO:0005581|GO:0005886|GO:0010744|GO:0030169|GO:0030301|GO:0010886|GO:0006898|GO:0005829|GO:0030666|GO:0071407|GO:0042953|GO:0005887|GO:0034381|GO:0034362|GO:0005044	.	NA	-	.	NA	NA	NA	NA	NA	NA	NA	NA	NA
LNCV6_137544_PI430048170	0.000113191	20.7965	10.0105	9.824	9.84316	P	P	P	5.66568	5.59786	5.25379	P	P	P	LNCV6_137544_PI430048170	mRNA	AGAGCCTAGTTTTTAATAGCTATGGAATCAATTCAATTTGGACTGGTGTGCTCTCTTTAA	NM_000576	RefSeq	chr2	-	112829759	112836779	IL1B	3553	interleukin 1, beta	GO:0032755|GO:0019221|GO:0046330|GO:0002711|GO:0005615|GO:0032757|GO:0035234|GO:0031622|GO:0009743|GO:0030730|GO:0000165|GO:0001660|GO:0033198|GO:0034116|GO:0043123|GO:0031663|GO:0043122|GO:0032729|GO:0045410|GO:0032725|GO:0007566|GO:0019904|GO:0030593|GO	.	NA	-	.	NA	NA	NA	NA	NA	NA	NA	NA	NA
LNCV6_142681_PI430048170	0.00242392	0.186666	4.63615	4.62402	4.63603	P	P	P	7.07224	7.23506	6.82397	P	P	P	LNCV6_142681_PI430048170	mRNA	GGCAACGAACGTGCTGGCATCAAAGAATATCAGTTTACATATATAACAAGTGTAATAAGA	NM_001113226	RefSeq	chr1	+	107140006	107481853	NTNG1	22854	netrin G1, transcript variant 1	GO:0005515|GO:0007409|GO:0046658	.	NA	-	.	NA	NA	NA	NA	NA	NA	NA	NA	NA
LNCV6_55545_PI430048170	0.00443204	0.109812	2.40036	1.31673	1.61589	A	A	A	4.96987	4.84072	5.27345	P	P	P	LNCV6_55545_PI430048170	mRNA	AGCAACAGATGAACAGCCTCACATTGGAAATTACCGTTTACAAAAAACAATAGGGAAGGG	NM_001286124	RefSeq	chr1	+	220528182	220664457	MARK1	4139	MAP/microtubule affinity-regulating kinase 1, transcript variant 1	GO:0070300|GO:0000287|GO:0005886|GO:0050321|GO:0005546|GO:0005524|GO:0035556|GO:0005737|GO:0004674|GO:0007010|GO:0015630|GO:0001786|GO:0006468|GO:0001764|GO:0005856|GO:0016055	.	NA	-	.	NA	NA	NA	NA	NA	NA	NA	NA	NA
LNCV6_138805_PI430048170	0.000621067	0.280984	2.46077	2.87189	2.48317	A	P	A	4.62843	4.38264	4.31829	P	P	P	LNCV6_138805_PI430048170	mRNA	CATCCATTAATATACTTCAGTAAGTATGTGAGTGGATTATGAGGTCTTAAAATGCTGGGT	NM_022160	RefSeq	chr9	+	22446840	22452473	DMRTA1	63951	DMRT-like family A1	GO:0000987|GO:0006355|GO:0001541|GO:0003700|GO:0007548|GO:0005634|GO:0060179|GO:0046872|GO:0042803|GO:0006351	.	NA	-	.	NA	NA	NA	NA	NA	NA	NA	NA	NA
LNCV6_142524_PI430048170	0.00512566	0.36646	7.03723	7.03634	6.68967	P	P	P	8.35795	8.35766	8.41864	P	P	P	LNCV6_142524_PI430048170	mRNA	GCTGAAAAATAATCCTAACAAACCCAAACTTTGTCACCATCCAATTGTAGAAGAACCTTA	NM_003551	RefSeq	chr5	-	138115171	138139443	NME5	8382	NME/NM23 family member 5	GO:0006241|GO:0003351|GO:0007286|GO:0004550|GO:0036126|GO:0005575|GO:0007283|GO:0005524|GO:0005622|GO:0006165|GO:0006228|GO:0042384|GO:0006183|GO:0021591|GO:0009116	.	NA	-	.	NA	NA	NA	NA	NA	NA	NA	NA	NA
LNCV6_127018_PI430048170	3.69606e-05	0.0855586	4.6511	4.27452	4.34735	P	P	P	8.05294	8.06049	7.8154	P	P	P	LNCV6_127018_PI430048170	mRNA	AGCTGCCTGTGATCTTCTTAGGTTATAGCCAAGTCAGCAACATAATTCCTCTAAATAAAA	NM_003649	RefSeq	chr6	-	110392179	110415550	DDO	8528	D-aspartate oxidase, transcript variant 1	GO:0005515|GO:0007320|GO:0048037|GO:0006531|GO:0006533|GO:0005102|GO:0042445|GO:0007625|GO:0019478|GO:0055114|GO:0008445|GO:0005777	.	NA	-	.	NA	NA	NA	NA	NA	NA	NA	NA	NA
LNCV6_127939_PI430048170	0.00695493	0.0878567	0.336794	0.307155	0.299632	A	A	A	4.32284	3.34891	3.61659	P	P	P	LNCV6_127939_PI430048170	mRNA	GGAATGGTTGGATTTTAGTTACAGCTGTGATTTGGAAGGGAAACTTTCAAAATAGTGAAA	NM_001172132	RefSeq	chr20	+	32052187	32101854	HCK	3055	HCK proto-oncogene, Src family tyrosine kinase, transcript variant 3	GO:0030133|GO:0005515|GO:0008284|GO:0071801|GO:0005884|GO:0008360|GO:0019221|GO:2000251|GO:0005634|GO:0042995|GO:0005764|GO:0030154|GO:0005829|GO:0050764|GO:0051090|GO:0046777|GO:0002758|GO:0006954|GO:0030838|GO:0071375|GO:0016032|GO:0007155|GO:0038083|GO	.	NA	-	.	NA	NA	NA	NA	NA	NA	NA	NA	NA
LNCV6_134811_PI430048170	2.1042e-06	9.56409	6.77759	6.67689	6.58633	P	P	P	3.51089	3.31663	3.44009	P	P	P	LNCV6_134811_PI430048170	mRNA	AAGCTACATCTCTCAACCTTGGGCAATGACAATAAAGTTTGAGAAGCTGATGGCTGTGTA	NM_032417	RefSeq	chrX	-	141697400	141698739	SPANXD	64648	SPANX family, member D	GO:0005737|GO:0005634	.	NA	-	.	NA	NA	NA	NA	NA	NA	NA	NA	NA
LNCV6_128395_PI430048170	0.000254129	0.27002	9.38663	9.35015	9.10006	P	P	P	11.2253	11.2203	11.069	P	P	P	LNCV6_128395_PI430048170	mRNA	TTCTCTGGAATGCAAGGAGGAGACTTCATTTACTTCCCAATAAACTTCATTTCTCTGGCA	NM_021013	RefSeq	chr17_GL383564v2_alt	+	57879	62596	KRT34	3885	keratin 34, type I	GO:0005882|GO:0008544|GO:0005198|GO:0005615|GO:0070062	.	NA	-	.	NA	NA	NA	NA	NA	NA	NA	NA	NA
LNCV6_134063_PI430048170	0.00381284	0.49059	2.57175	2.51944	2.87722	P	P	P	3.76458	3.57774	3.72805	P	P	P	LNCV6_134063_PI430048170	mRNA	GCAGCACTTGTTTACTGGCTGCTTTCTGGCTCGAAATAAAGGAATCGTGCTTGTGTCGGG	NM_001167602	RefSeq	chr2	+	241810931	241817413	NEU4	129807	sialidase 4, transcript variant 5	GO:0005515|GO:0006665|GO:0009313|GO:0006687|GO:0006689|GO:0004308|GO:0044281|GO:0005764|GO:0052794|GO:0005739|GO:0052796|GO:0052795|GO:0019866|GO:0006516|GO:0006488|GO:0044267|GO:0043687|GO:0018279|GO:0043202	.	NA	-	.	NA	NA	NA	NA	NA	NA	NA	NA	NA
LNCV6_130379_PI430048170	7.95448e-05	10.1154	7.13892	6.75866	6.88337	P	P	P	3.37216	3.85805	3.51778	P	P	P	LNCV6_130379_PI430048170	mRNA	TACGTGGGAGAGGCAGAAAGGGTAGGTTCAGTAATCATTTCTGATATTTGCTGGAGTGCT	NM_000674	RefSeq	chr1	+	203127707	203167405	ADORA1	134	adenosine A1 receptor, transcript variant 1	GO:0006909|GO:0005515|GO:0001659|GO:0043268|GO:0060087|GO:0046888|GO:0048167|GO:0006612|GO:0045211|GO:0043025|GO:0030673|GO:0048786|GO:0046982|GO:0051967|GO:0045741|GO:0060079|GO:0014069|GO:0002674|GO:0031683|GO:0016042|GO:0001609|GO:0042734|GO:0005887|GO	.	NA	-	.	NA	NA	NA	NA	NA	NA	NA	NA	NA
LNCV6_135522_PI430048170	5.43323e-05	4.40068	14.9714	14.9564	14.7391	P	P	P	12.8078	12.8	12.6522	P	P	P	LNCV6_135522_PI430048170	mRNA	CCTGACTGGTCTAGAGAACTGATGTTTCAATTTACCCCTCTGCTAAATAAATATTAAAAC	NM_001920	RefSeq	chr12	-	91145257	91183029	DCN	1634	decorin, transcript variant A1	GO:0019800|GO:0005518|GO:0005589|GO:0044281|GO:0005539|GO:0005615|GO:0030208|GO:0030207|GO:0030206|GO:0022617|GO:0030198|GO:0032496|GO:0009887|GO:0030204|GO:0030203|GO:0043202|GO:0005975|GO:0005796|GO:0001822|GO:0007568|GO:0050840|GO:0005578|GO:0005576|GO	.	NA	-	.	NA	NA	NA	NA	NA	NA	NA	NA	NA
LNCV6_138321_PI430048170	3.20156e-05	6.72375	6.70246	6.48118	6.4036	P	P	P	3.72671	3.64481	3.96532	P	P	P	LNCV6_138321_PI430048170	mRNA	GATTGGTACACAAAAGCTAAAGCAGTGGCTGGGGCTTTGTTTTTAAATTTTGGGTTTTTT	NM_058237	RefSeq	chr14_KI270847v1_alt	+	1288873	1394297	PPP4R4	57718	protein phosphatase 4, regulatory subunit 4, transcript variant 1	GO:0005515|GO:0008287|GO:0005737|GO:0019888|GO:0080163|GO:0032515	.	NA	-	.	NA	NA	NA	NA	NA	NA	NA	NA	NA
LNCV6_136049_PI430048170	0.000301132	0.182085	9.19453	9.07545	8.89903	P	P	P	11.5326	11.4535	11.5677	P	P	P	LNCV6_136049_PI430048170	mRNA	CTCATATTGGGGTTCGACAGGTAAACACAAACTGCTATTTCAGTAGAAAAAGTTATTGTT	NM_003474	RefSeq	chr10	-	126012384	126388558	ADAM12	8038	ADAM metallopeptidase domain 12, transcript variant 1	GO:0005515|GO:0017124|GO:0005886|GO:0005576|GO:0007520|GO:0005739|GO:0007173|GO:0006508|GO:0005654|GO:0008270|GO:0016021|GO:0004222|GO:0007155|GO:0008237	.	NA	-	.	NA	NA	NA	NA	NA	NA	NA	NA	NA
LNCV6_129676_PI430048170	0.00100036	0.460856	4.82878	4.69963	4.88063	P	P	P	5.91231	6.07021	5.76963	P	P	P	LNCV6_129676_PI430048170	mRNA	GGTGGTGAATAACCTCTATCCCTAATCAAATGAATCTGACAAGAAACTTTCCAATAAATG	NM_003709	RefSeq	chr2	-	207074137	207166016	KLF7	8609	Kruppel-like factor 7 (ubiquitous), transcript variant 1	GO:0048813|GO:0003700|GO:0006357|GO:0007411|GO:0003713|GO:0008270|GO:0005634|GO:0045893|GO:0003677|GO:0006351	.	NA	-	.	NA	NA	NA	NA	NA	NA	NA	NA	NA
LNCV6_111946_PI430048170	0.000289541	11.5324	11.0441	10.6599	11.0323	P	P	P	7.4123	7.47207	7.29558	P	P	P	LNCV6_111946_PI430048170	mRNA	ATAATTACTGCCGAATCCTGATGGGGATGCCAAGCCCTGGTGCCACGTGCTGAAGAACCG	NM_000930	RefSeq	chr8	-	42174717	42207676	PLAT	5327	plasminogen activator, tissue, transcript variant 1	GO:0005515|GO:0004252|GO:0043434|GO:0045202|GO:0005615|GO:0051591|GO:0005737|GO:0048167|GO:0006508|GO:0030141|GO:0070062|GO:0001666|GO:0009986|GO:0035249|GO:0014909|GO:0045177|GO:0005576|GO:0055085|GO:0045861|GO:0031012|GO:0007596|GO:0031639|GO:0048008|GO	.	NA	-	.	NA	NA	NA	NA	NA	NA	NA	NA	NA
LNCV6_132130_PI430048170	0.000227118	2.17864	7.93965	7.77157	7.73176	P	P	P	6.69517	6.79645	6.58163	P	P	P	LNCV6_132130_PI430048170	mRNA	AGCATTGTGTATATAGCAGACATGGAGGTCCTGCAGCAGGAGGTGCTCAATAAACACAAA	NM_033199	RefSeq	chr3	-	48561717	48563768	UCN2	90226	urocortin 2	GO:0035902|GO:0001664|GO:0008283|GO:0051431|GO:0042562|GO:0007586|GO:0033685|GO:0005102|GO:0006950|GO:0071456|GO:0046882|GO:0005576|GO:0005615|GO:0071385|GO:0005179|GO:0010629|GO:0031669|GO:0006171|GO:0007189	.	NA	-	.	NA	NA	NA	NA	NA	NA	NA	NA	NA
LNCV6_128873_PI430048170	3.95449e-05	0.225236	5.04285	5.10816	4.85154	P	P	P	7.28173	7.1591	7.01284	P	P	P	LNCV6_128873_PI430048170	mRNA	GTTGAAAACTCAGACTGCTTTTGTGATGTTTCAAATGAATAAAACTATCCTCCCCTCGTT	NM_017938	RefSeq	chrX	-	120258649	120311536	TMEM255A	55026	transmembrane protein 255A, transcript variant 1	GO:0016021	.	NA	-	.	NA	NA	NA	NA	NA	NA	NA	NA	NA
LNCV6_137991_PI430048170	0.0169768	0.483487	7.29178	6.94252	6.72965	P	P	P	8.02686	7.99096	8.14355	P	P	P	LNCV6_137991_PI430048170	mRNA	ATATACGAGTTCTATTTGGAGTTGGGAAAATTCCTAGCAATGGCTCCCTCCAATGGGAAA	NM_152592	RefSeq	chr14	-	95417493	95475836	SYNE3	161176	spectrin repeat containing, nuclear envelope family member 3	GO:0005791|GO:0005640|GO:0005515|GO:0051015|GO:0016020|GO:0090150|GO:0008360|GO:0007010|GO:0034993|GO:0090286|GO:0016021|GO:0005635	.	NA	-	.	NA	NA	NA	NA	NA	NA	NA	NA	NA
LNCV6_135342_PI430048170	0.0030033	2.17859	6.10349	6.3008	6.06651	P	P	P	5.18858	5.10431	4.78887	P	P	P	LNCV6_135342_PI430048170	mRNA	CCTGCTTGCTTACTGCTTATATTTGCTCAGGGAAGAGTAGGAAAATAAAATATATGCAAA	NM_178817	RefSeq	chr21	+	32291812	32312288	MRAP	56246	melanocortin 2 receptor accessory protein, transcript variant 1	GO:0005515|GO:0005886|GO:0005783|GO:0030819|GO:0031780|GO:0070996|GO:0031783|GO:0050873|GO:0031781|GO:0034394|GO:0031782|GO:0005789|GO:0016021	.	NA	-	.	NA	NA	NA	NA	NA	NA	NA	NA	NA
LNCV6_141322_PI430048170	0.00964092	0.0744685	1.66922	0.344725	1.77403	A	A	A	5.06152	5.3744	4.94543	P	P	P	LNCV6_141322_PI430048170	mRNA	TAGCTTTTCTTGTTCCTGGACTAGGCAATGAATAAGCAACAATGTATCTTTTCTGTGTTC	NM_001178020	RefSeq	chr16	+	66427296	66482842	BEAN1	146227	brain expressed, associated with NEDD4, 1, transcript variant 1	GO:0016021	.	NA	-	.	NA	NA	NA	NA	NA	NA	NA	NA	NA
LNCV6_143610_PI430048170	0.00678256	0.492171	4.8761	5.29691	4.95122	P	P	P	6.19096	6.03083	5.99908	P	P	P	LNCV6_143610_PI430048170	mRNA	CTGGTGAGAAATTCTAAAAATGTGAAGACTATGGCAAAGTCTTTAAATGGTTGTCACACT	NM_001256171	RefSeq	chr19_GL383573v1_alt	+	266528	293973	ZNF85	7639	zinc finger protein 85, transcript variant 3	GO:0006355|GO:0003700|GO:0003714|GO:0005654|GO:0005634|GO:0003677|GO:0046872|GO:0006351	.	NA	-	.	NA	NA	NA	NA	NA	NA	NA	NA	NA
LNCV6_136815_PI430048170	0.00187857	38.6247	5.83667	6.03822	6.07652	P	P	P	0.330141	0.383965	1.24259	A	A	A	LNCV6_136815_PI430048170	mRNA	TGTCACACCTGAAATGGCTTTGTTTTTATCAATAAATACTTGTTGATTGCGGTAAACAGC	NM_153022	RefSeq	chr12	+	10178957	10191804	TMEM52B	120939	transmembrane protein 52B, transcript variant 1	GO:0008150|GO:0003674|GO:0016021|GO:0070062	.	NA	-	.	NA	NA	NA	NA	NA	NA	NA	NA	NA
LNCV6_139035_PI430048170	0.0123887	2.58163	3.89821	3.76779	3.64097	P	P	P	2.35752	2.73545	2.03538	A	P	A	LNCV6_139035_PI430048170	mRNA	TCCAGGTGCAGAAGTGACCGCGGAGACTCTGCTTCACGAGTTTCAGGAGCTGCTGAAAGA	NM_001014980	RefSeq	chr1	-	1242445	1246722	FAM132A	388581	family with sequence similarity 132, member A	GO:0045721|GO:0051897|GO:0046324|GO:0005179|GO:0035774|GO:0050728|GO:0046326|GO:0046628|GO:0005576|GO:0005615	.	NA	-	.	NA	NA	NA	NA	NA	NA	NA	NA	NA
LNCV6_141446_PI430048170	5.64234e-05	0.181368	6.27902	6.13807	6.01671	P	P	P	8.71537	8.6883	8.41205	P	P	P	LNCV6_141446_PI430048170	mRNA	GTTGCCACCTGTTAAAATGTACACTGGATATGTTGTTAAACACGTGTCTATAATGGAAAC	NM_000596	RefSeq	chr7	+	45888359	45893668	IGFBP1	3484	insulin-like growth factor binding protein 1	GO:0008286|GO:0030307|GO:0031994|GO:0031995|GO:0005576|GO:0042246|GO:0005615|GO:0030968|GO:0007165|GO:0043567|GO:0006987|GO:0044267|GO:0005520	.	NA	-	.	NA	NA	NA	NA	NA	NA	NA	NA	NA
LNCV6_130823_PI430048170	0.00155308	2.69823	9.84158	9.80356	9.70243	P	P	P	8.45623	8.43118	8.14783	P	P	P	LNCV6_130823_PI430048170	mRNA	CCAGTCTATTCACAGAAGTGTTAACTTTTCTAACAGAAAGCATGATTTTGATTGCTTACC	NM_006207	RefSeq	chr8	+	17576432	17643133	PDGFRL	5157	platelet-derived growth factor receptor-like	GO:0008150|GO:0005019|GO:0004992|GO:0007186|GO:0035791|GO:0005576|GO:0005575	.	NA	-	.	NA	NA	NA	NA	NA	NA	NA	NA	NA
LNCV6_144909_PI430048170	9.7418e-05	8.06894	7.99347	7.82615	7.77935	P	P	P	4.80741	4.88269	4.87937	P	P	P	LNCV6_144909_PI430048170	mRNA	GTTCACTTGATGGGGAATGACTAGAATGGGGCAATAACAAATCATTTCTAAACAGTTATT	NM_033427	RefSeq	chr7	-	117710650	117873507	CTTNBP2	83992	cortactin binding protein 2	GO:0017124|GO:0043197|GO:0007420|GO:0005938|GO:0008021	.	NA	-	.	NA	NA	NA	NA	NA	NA	NA	NA	NA
LNCV6_143403_PI430048170	0.00214212	0.048501	0.984776	1.2706	0.2625	A	A	A	5.33157	5.38303	5.05663	P	P	P	LNCV6_143403_PI430048170	mRNA	ACTTGGTTTCTGATTTGCTCTATTTCAGCAGATCTTTTCTACCTACTTTGTGTGATCAAA	NM_032411	RefSeq	chr2	+	106065656	106078153	C2orf40	84417	chromosome 2 open reading frame 40	GO:0030133|GO:0008054|GO:0005615|GO:0070314|GO:0090398	.	NA	-	.	NA	NA	NA	NA	NA	NA	NA	NA	NA
LNCV6_136061_PI430048170	1.6005e-06	12.752	8.07794	8.02803	8.22845	P	P	P	4.33126	4.49438	4.49242	P	P	P	LNCV6_136061_PI430048170	mRNA	TGTGAACCCATCCAGAGTGTCTTCTTCTTCTCTGGAGACAAGTACTACCGAGTCAATCTT	NM_000638	RefSeq	chr17	-	28367277	28370352	VTN	7448	vitronectin	GO:0005515|GO:0030449|GO:0030949|GO:0033627|GO:0090303|GO:0010811|GO:0050731|GO:0072562|GO:0035987|GO:0005615|GO:0014911|GO:0032092|GO:0006955|GO:0030198|GO:0007155|GO:0008201|GO:0070062|GO:0005044|GO:0050840|GO:0005578|GO:0005576|GO:0006898|GO:0010951|GO	.	NA	-	.	NA	NA	NA	NA	NA	NA	NA	NA	NA
LNCV6_144435_PI430048170	0.00229291	5.64799	9.70618	9.59896	9.28172	P	P	P	7.01158	7.06641	7.04809	P	P	P	LNCV6_144435_PI430048170	mRNA	AATGGAGAGTAAGCAGCAGCAAACTGAGAATTATCCAGCATATGAATATAACAATGTGTT	NM_032291	RefSeq	chr1	+	66533955	66751139	SGIP1	84251	SH3-domain GRB2-like (endophilin) interacting protein 1	GO:0005515|GO:0008017|GO:0017124|GO:0005886|GO:0030122|GO:0097320|GO:0030136|GO:0002021|GO:0006897|GO:2000253|GO:0005737|GO:0005905|GO:0005543|GO:0048260|GO:2000507	.	NA	-	.	NA	NA	NA	NA	NA	NA	NA	NA	NA
LNCV6_135398_PI430048170	0.048419	3.89731	4.02792	4.11296	3.95446	P	P	P	1.80973	2.79784	1.09993	A	P	A	LNCV6_135398_PI430048170	mRNA	CGTCATTATAATTGTACTGGGAAAAGGATTCTTGCAAGAAGCCTTAAAATGAATTCAAGG	NM_181756	RefSeq	chr19	+	44259913	44275317	ZNF233	353355	zinc finger protein 233, transcript variant 1	GO:0006355|GO:0005634|GO:0003677|GO:0046872|GO:0006351	.	NA	-	.	NA	NA	NA	NA	NA	NA	NA	NA	NA
LNCV6_138359_PI430048170	0.0328322	3.06213	2.97283	2.91802	3.39882	P	P	P	1.8305	1.74213	0.655029	A	A	A	LNCV6_138359_PI430048170	mRNA	CAGCCAAAGGGCTGTTTAAAAACAAAGCCTCCATGTAAACCATTTCTGCAAGAATATTTT	NM_198582	RefSeq	chr2	+	238138721	238152906	KLHL30	377007	kelch-like family member 30	NA	.	NA	-	.	NA	NA	NA	NA	NA	NA	NA	NA	NA
LNCV6_131003_PI430048170	0.00998492	0.45747	9.45333	9.29711	9.04956	P	P	P	10.422	10.4077	10.3832	P	P	P	LNCV6_131003_PI430048170	mRNA	TAGGTCAGTGTAAAGAAATATGATTTGAGGTGGTGCATGCAAGTAACTAGGGTTTATTCT	NM_001114	RefSeq	chr16	+	50287911	50318134	ADCY7	113	adenylate cyclase 7, transcript variant 1	GO:0005886|GO:0030819|GO:0007268|GO:0007202|GO:0044281|GO:0007193|GO:0046872|GO:0035556|GO:0007173|GO:0071377|GO:0006171|GO:0006833|GO:0034199|GO:0048011|GO:0060135|GO:0005524|GO:0055085|GO:0003091|GO:0007165|GO:0071361|GO:0006112|GO:0004016|GO:0008543|GO	.	NA	-	.	NA	NA	NA	NA	NA	NA	NA	NA	NA
LNCV6_144625_PI430048170	0.000160403	568.54	10.4235	10.1756	10.0028	P	P	P	0.940695	0.553296	1.5198	A	A	A	LNCV6_144625_PI430048170	mRNA	GTTAAAAGAGAGAGATGTGCTGTCAGTTTTCCTTCCGGATGTACCAGAAACTGAGAGCTA	NM_178859	RefSeq	chr15	+	65045369	65053396	SLC51B	123264	solute carrier family 51, beta subunit	GO:0043234|GO:0005215|GO:0070863|GO:0031647|GO:0046982|GO:0005886|GO:0015721|GO:0090314|GO:0060050|GO:0016021	.	NA	-	.	NA	NA	NA	NA	NA	NA	NA	NA	NA
LNCV6_121105_PI430048170	0.012341	3.54374	7.06717	6.96167	6.90983	P	P	P	4.7789	5.55694	5.01865	P	P	P	LNCV6_121105_PI430048170	mRNA	CTGTCCCTGGAACTGAAATGTGAATTTCTAGCAGAACAGAAAATATTATAATAATGAGGC	NM_152721	RefSeq	chr18	+	69401047	69849086	DOK6	220164	docking protein 6	GO:0005515|GO:0005158	.	NA	-	.	NA	NA	NA	NA	NA	NA	NA	NA	NA
LNCV6_131818_PI430048170	3.26436e-05	17.1875	7.13694	7.07365	6.8196	P	P	P	2.97482	2.95331	2.80555	P	P	P	LNCV6_131818_PI430048170	mRNA	GGAGGGACAAAGTGAGGAAAAGGTGCTCATTAAAGCTACCGGGCACCTTAGCTCAAAAAA	NM_019609	RefSeq	chr20	-	2794068	2800646	CPXM1	56265	carboxypeptidase X (M14 family), member 1, transcript variant 1	GO:0006508|GO:0008270|GO:0005615|GO:0004181	.	NA	-	.	NA	NA	NA	NA	NA	NA	NA	NA	NA
LNCV6_138594_PI430048170	0.00437145	2.03516	10.7711	10.665	10.475	P	P	P	9.66574	9.58587	9.59823	P	P	P	LNCV6_138594_PI430048170	mRNA	CAGACTGAATAGATCTTAACTGTCTCCTACATGTGTGTTTTCAAATGTGTATAGATGCTA	NM_003528	RefSeq	chr1	-	149884459	149886682	HIST2H2BE	8349	histone cluster 2, H2be	GO:0046982|GO:0050830|GO:0019731|GO:0006334|GO:0006325|GO:0005654|GO:0005634|GO:0000786|GO:0005615|GO:0003677|GO:0070062|GO:0002227	.	NA	-	.	NA	NA	NA	NA	NA	NA	NA	NA	NA
LNCV6_126695_PI430048170	0.00279384	4.44327	4.4111	4.08286	3.98296	P	P	P	2.0417	1.97043	2.04422	A	A	A	LNCV6_126695_PI430048170	mRNA	CCATAAGACCATGTGGGTTTCCATGGTGGCTATCAATAAAACTCCTTAGGAAAACTTAAA	NM_001253837	RefSeq	chr10	-	100288145	100330486	PKD2L1	9033	polycystic kidney disease 2-like 1, transcript variant 2	GO:0008092|GO:0005515|GO:0060170|GO:0005886|GO:0005783|GO:0005272|GO:0008324|GO:0071468|GO:0007224|GO:0042802|GO:0043231|GO:0070207|GO:0050982|GO:0035725|GO:0005227|GO:0071805|GO:0006812|GO:0001581|GO:0005262|GO:0005261|GO:0009986|GO:0005509|GO:0031513|GO	.	NA	-	.	NA	NA	NA	NA	NA	NA	NA	NA	NA
LNCV6_105331_PI430048170	0.000426565	2.22029	6.96365	7.00428	7.14113	P	P	P	5.822	6.0337	5.79515	P	P	P	LNCV6_105331_PI430048170	mRNA	TATACCAAACATTATCTCCGCGAAAGATATCAAGAGATGAGGTGTCCCTAGAGGATTCCT	NM_001169117	RefSeq	chr4	+	26860690	27025381	STIM2	57620	stromal interaction molecule 2, transcript variant 3	GO:0005515|GO:0032237|GO:0005886|GO:0051928|GO:0005783|GO:0005246|GO:0005509|GO:0070588|GO:0006874|GO:0005789|GO:0015279|GO:0016021	.	NA	-	.	NA	NA	NA	NA	NA	NA	NA	NA	NA
LNCV6_145437_PI430048170	0.000102527	0.00609256	3.09321	3.08545	2.83663	P	P	A	10.3551	10.3905	10.3601	P	P	P	LNCV6_145437_PI430048170	mRNA	GAAGGAATGGGTGCTTTGTGATGGATAAAAGGCATTAAATAAAACCACGTTTACATTTTG	NM_005244	RefSeq	chr20	+	46894623	47188844	EYA2	2139	EYA transcriptional coactivator and phosphatase 2, transcript variant 1	GO:0005515|GO:0005813|GO:0006355|GO:0000287|GO:0016576|GO:0005634|GO:0035335|GO:0006351|GO:0097192|GO:0005739|GO:0005737|GO:0007501|GO:0006281|GO:0014706|GO:0004725	.	NA	-	.	NA	NA	NA	NA	NA	NA	NA	NA	NA
LNCV6_128649_PI430048170	0.0359812	0.221063	1.64023	1.52971	0.0856744	A	A	A	3.66722	3.20973	3.32282	P	P	P	LNCV6_128649_PI430048170	mRNA	GTGCTGAAGACCTCTTTTACTTTCCGGGCAAGTGAATGTCATTTTAATCAATATCAATGA	NM_172201	RefSeq	chr21	+	34364023	34371141	KCNE2	9992	potassium channel, voltage gated subfamily E regulatory beta subunit 2	GO:0005251|GO:0005242|GO:0005886|GO:0009986|GO:0007568|GO:0060306|GO:0010107|GO:0015459|GO:0060307|GO:0086091|GO:0005764|GO:0035690|GO:0042803|GO:0044325|GO:0071435|GO:0086009|GO:0008076|GO:0086002|GO:0086011|GO:0034613|GO:0043586|GO:0071805|GO:0086005	.	NA	-	.	NA	NA	NA	NA	NA	NA	NA	NA	NA
LNCV6_129586_PI430048170	0.000476464	18.6443	9.23158	9.21988	9.14959	P	P	P	4.86596	5.20606	4.83863	P	P	P	LNCV6_129586_PI430048170	mRNA	TCCGCAGTGCGGATAAAAATTGGACTCGAATAAAACCCTTGGTGCCCGGATGGTAAAAAA	NM_001291831	RefSeq	chr7	+	76201892	76287292	SRRM3	222183	serine/arginine repetitive matrix 3, transcript variant 1	NA	.	NA	-	.	NA	NA	NA	NA	NA	NA	NA	NA	NA
LNCV6_134376_PI430048170	6.49783e-06	278.428	10.7709	10.4877	10.434	P	P	P	2.62625	2.55043	2.12726	A	P	A	LNCV6_134376_PI430048170	mRNA	TTTCCAACAGCCACTTGTTTTGTGCACTTCCGTCCTCTAAAACTAAATGGAATTTAATTA	NM_021973	RefSeq	chr4	-	173526500	173530227	HAND2	9464	heart and neural crest derivatives expressed 2	GO:0005515|GO:0000790|GO:0044212|GO:0010463|GO:0048538|GO:0042803|GO:0007512|GO:0007507|GO:0001947|GO:0014032|GO:0010667|GO:0003278|GO:0000977|GO:0046982|GO:0003713|GO:0070888|GO:0001701|GO:0048485|GO:0043392|GO:0043234|GO:0048935|GO:0060536|GO:2000763|GO	.	NA	-	.	NA	NA	NA	NA	NA	NA	NA	NA	NA
LNCV6_140164_PI430048170	0.0157281	3.04934	8.89297	8.85915	8.88366	P	P	P	7.5109	7.38307	6.82992	P	P	P	LNCV6_140164_PI430048170	mRNA	GTGTGGCTTTCTGAGTATTTGAACCCCAGTCCTGTGTCACCTTCCTTTTTCCTTCTATGT	NM_012109	RefSeq	chr19	+	18612871	18621039	TMEM59L	25789	transmembrane protein 59-like	GO:0016020|GO:0000139|GO:0016021	.	NA	-	.	NA	NA	NA	NA	NA	NA	NA	NA	NA
LNCV6_111584_PI430048170	0.0085831	3.2607	7.43986	7.22481	7.22192	P	P	P	5.14987	5.83347	5.71095	P	P	P	LNCV6_111584_PI430048170	mRNA	TCTGCAGGACGAGGATGGCTACAGGATGAAGTTTGCCTGCTACTACCCCCGTGTGGAGTA	NM_007293	RefSeq	chr6_GL000252v2_alt	+	3229829	3250454	C4A	NA	complement component 4A (Rodgers blood group), transcript variant 1	NA	.	NA	-	.	NA	NA	NA	NA	NA	NA	NA	NA	NA
LNCV6_134813_PI430048170	9.84242e-06	0.202193	6.43943	6.54377	6.37126	P	P	P	8.72569	8.67352	8.87171	P	P	P	LNCV6_134813_PI430048170	mRNA	GTTAGCGAGCACCTTTTGACCAGTAATAAAAAACCTTGGCTTTGGAGTTTTCCACTGAAA	NM_030758	RefSeq	chr22	+	30694805	30907824	OSBP2	23762	oxysterol binding protein 2, transcript variant 1	GO:0016020|GO:0015485|GO:0006869	.	NA	-	.	NA	NA	NA	NA	NA	NA	NA	NA	NA
LNCV6_131466_PI430048170	0.00701717	0.374584	5.80384	5.7289	5.13767	P	P	P	7.15853	7.11329	6.69181	P	P	P	LNCV6_131466_PI430048170	mRNA	GAAGTATATTTACATTATCTGGAGAGTTTTGTTGCAGCTACGAGTTTGTATGGCAAATTC	NM_000824	RefSeq	chr4	+	157076124	157172090	GLRB	2743	glycine receptor, beta, transcript variant 1	GO:0005515|GO:0030054|GO:0005886|GO:0034707|GO:0007268|GO:0055085|GO:0051291|GO:0016933|GO:0016934|GO:0007399|GO:0001964|GO:0034220|GO:0005887|GO:0007218|GO:0045211|GO:0008144|GO:0042391|GO:0007628|GO:0016594|GO:0007340|GO:0060012|GO:0007601|GO:0060013|GO	.	NA	-	.	NA	NA	NA	NA	NA	NA	NA	NA	NA
LNCV6_134165_PI430048170	0.0103023	2.37411	6.50618	6.07788	6.04844	P	P	P	5.03727	4.99019	4.90677	P	P	P	LNCV6_134165_PI430048170	mRNA	GTACAGTCTGTAGTTAGGAGGTATAGCCTATAGCTTATGTTAAATGGTTGAAATGGTTCT	NM_014722	RefSeq	chr6	-	24804280	24911170	FAM65B	9750	family with sequence similarity 65, member B, transcript variant 1	GO:0005739|GO:0005515|GO:0005737|GO:0060171|GO:0007517|GO:0007605|GO:0030175|GO:0005856|GO:0030154	.	NA	-	.	NA	NA	NA	NA	NA	NA	NA	NA	NA
LNCV6_110647_PI430048170	0.00528155	3.85053	5.80653	5.4503	5.64689	P	P	P	3.2352	3.75358	3.99984	P	P	P	LNCV6_110647_PI430048170	mRNA	CCGATTGACATGCGACACCAGGAAGGAAGGTACCATTACGAGCCTCATTCTGTCCACGGT	NM_005270	RefSeq	chr2	+	120797290	120992653	GLI2	2736	GLI family zinc finger 2	GO:0005515|GO:0007389|GO:0033089|GO:0003700|GO:0044212|GO:0021696|GO:0021965|GO:0030879|GO:0007224|GO:0007507|GO:0048589|GO:0007411|GO:0002062|GO:0060603|GO:0060032|GO:0021938|GO:0045740|GO:0000122|GO:0001701|GO:0001649|GO:0007418|GO:0001501|GO:0002076|GO	.	NA	-	.	NA	NA	NA	NA	NA	NA	NA	NA	NA
LNCV6_132090_PI430048170	0.00134032	0.0308938	2.38871	2.81609	3.07424	A	P	P	7.76144	7.79612	7.85082	P	P	P	LNCV6_132090_PI430048170	mRNA	GACTTCACTGAAACTGACTGCATCTTGCAATTTTCTTTTTCGAATTGGCAGAAATATTGT	NM_001195278	RefSeq	chr7	+	141074231	141480379	TMEM178B	100507421	transmembrane protein 178B	GO:0016021	.	NA	-	.	NA	NA	NA	NA	NA	NA	NA	NA	NA
LNCV6_145048_PI430048170	0.00432193	0.102418	0.475858	0.368675	1.49795	A	A	A	4.46672	4.05651	3.90811	P	P	P	LNCV6_145048_PI430048170	mRNA	CTACTGTCTGTATGTGCCCAGATAAAATTTTCATGAGAGTAGTTTACAAAAGCCGTATTT	NM_001171876	RefSeq	chrX	-	139581770	139708222	MCF2	4168	MCF.2 cell line derived transforming sequence, transcript variant 3	GO:0005515|GO:0051056|GO:0048011|GO:0043065|GO:0007264|GO:0097190|GO:0016358|GO:0005829|GO:0016020|GO:0032321|GO:0005089|GO:0005856|GO:0070062	.	NA	-	.	NA	NA	NA	NA	NA	NA	NA	NA	NA
LNCV6_134450_PI430048170	0.000379428	7.40058	7.93095	7.72487	7.8417	P	P	P	5.18035	4.88377	4.74278	P	P	P	LNCV6_134450_PI430048170	mRNA	GTACACCAGTATTTTGCATTCAGTATTGTCAAGGCCATGACTGTTGTTTTAGTAAACTTG	NM_001102654	RefSeq	chr12	+	5432113	5495299	NTF3	4908	neurotrophin 3, transcript variant 1	GO:0008284|GO:0032856|GO:0050732|GO:0007267|GO:2000251|GO:0050731|GO:0021675|GO:0000187|GO:0043524|GO:0033138|GO:0007411|GO:0045944|GO:0032148|GO:0005166|GO:0030335|GO:0042490|GO:0048406|GO:0042552|GO:0005102|GO:0050804|GO:0005576|GO:0045687|GO:0007274|GO	.	NA	-	.	NA	NA	NA	NA	NA	NA	NA	NA	NA
LNCV6_143247_PI430048170	0.00620456	0.000820061	3.02728	1.75066	0.100527	P	A	A	12.3392	12.2929	12.3312	P	P	P	LNCV6_143247_PI430048170	mRNA	CCGTGCATCTGTATTCACCCTGTATGACAAACACATTACATTATTAAATGTTTCTCAAAG	NM_002124	RefSeq	chr6_GL000255v2_alt	-	3715352	3792416	HLA-DRB1	3123	major histocompatibility complex, class II, DR beta 1, transcript variant 1	GO:0002437|GO:0050852|GO:0005886|GO:0019221|GO:0031295|GO:0042088|GO:0005765|GO:0042130|GO:0019886|GO:0006955|GO:0002381|GO:0042605|GO:2001179|GO:0071556|GO:0032689|GO:0070062|GO:0060333|GO:0030658|GO:0012507|GO:0051262|GO:0009986|GO:0002506|GO:0035774|GO	.	NA	-	.	NA	NA	NA	NA	NA	NA	NA	NA	NA
LNCV6_141629_PI430048170	0.00141874	3.78521	11.1218	10.8914	10.8428	P	P	P	9.00633	9.06634	9.03722	P	P	P	LNCV6_141629_PI430048170	mRNA	CTTTCTGGGATAACATGGTGAGCTATATGGTGGTAATCCACACACACAAAAATAAAAGCC	NM_002184	RefSeq	chr5	-	55935096	55994993	IL6ST	3572	interleukin 6 signal transducer, transcript variant 1	GO:0038154|GO:0005515|GO:0005138|GO:0004921|GO:0008284|GO:0005886|GO:0004924|GO:0004923|GO:0019221|GO:0019981|GO:0005615|GO:0042803|GO:0030425|GO:0070110|GO:0002675|GO:0019838|GO:0042102|GO:0043025|GO:0070104|GO:0016032|GO:0070102|GO:0004897|GO:0034097|GO	.	NA	-	.	NA	NA	NA	NA	NA	NA	NA	NA	NA
LNCV6_137681_PI430048170	7.54246e-05	2.36307	9.06172	8.99724	8.87877	P	P	P	7.81434	7.74037	7.66299	P	P	P	LNCV6_137681_PI430048170	mRNA	CATTGCGCTGAACAGTATTTGAGTTACCATATAATATGGCTTTACACAAGGAAATGTGTG	NM_138426	RefSeq	chr7	+	7968742	8089079	GLCCI1	113263	glucocorticoid induced 1	GO:0005737	.	NA	-	.	NA	NA	NA	NA	NA	NA	NA	NA	NA
LNCV6_129264_PI430048170	0.0390291	3.14633	3.96516	3.34224	3.47932	P	P	P	2.32656	1.00106	2.2371	A	A	A	LNCV6_129264_PI430048170	mRNA	CCGGGTTCACGAACTTGGTGCATTTCCTTCCAGACTTTTAAAAAGAAGATATTTAGGGAA	NM_000923	RefSeq	chr19	-	18207960	18248200	PDE4C	5143	phosphodiesterase 4C, cAMP-specific, transcript variant 1	GO:0007165|GO:0004115|GO:0072372|GO:0005615|GO:0046872|GO:0006198|GO:0005829	.	NA	-	.	NA	NA	NA	NA	NA	NA	NA	NA	NA
LNCV6_136249_PI430048170	0.00649294	2.30882	8.03256	7.69785	7.44526	P	P	P	6.39155	6.34363	6.82851	P	P	P	LNCV6_136249_PI430048170	mRNA	TTGTTCAGACAGAGTTGTACCTGCAGCAGACAACTCTGAATTAAAGCATGAAAACACAGC	NM_014723	RefSeq	chr20	+	1266315	1309327	SNPH	9751	syntaphilin	GO:0005881|GO:0043005|GO:0016081|GO:0030054|GO:0031966|GO:0007269|GO:0042734|GO:0005737|GO:0007420|GO:0030182|GO:0043025|GO:0016021|GO:0017075	.	NA	-	.	NA	NA	NA	NA	NA	NA	NA	NA	NA
LNCV6_68250_PI430048170	0.00332617	2.34778	11.2768	10.9467	10.9236	P	P	P	9.83682	9.73491	9.90422	P	P	P	LNCV6_68250_PI430048170	mRNA	TACACTTGTGAGGAGCCATATTACTACATGGAAAATGGAGGAGGTGGGGAGTATCACTGT	NM_201442	RefSeq	chr12	+	7060675	7071031	C1S	716	complement component 1, s subcomponent, transcript variant 1	GO:0005515|GO:0006956|GO:0004252|GO:0045087|GO:0006958|GO:0005509|GO:0006508|GO:0072562|GO:0005576|GO:0070062|GO:0042802	.	NA	-	.	NA	NA	NA	NA	NA	NA	NA	NA	NA
LNCV6_137306_PI430048170	0.000128128	8.13498	7.81414	7.79005	7.46444	P	P	P	4.79904	4.81437	4.36507	P	P	P	LNCV6_137306_PI430048170	mRNA	GTCATCTGATTTCCTCTGAACACTGACCTTTGAAGCTTTGTGAATCCTACGTAAAGCACT	NM_005302	RefSeq	chr7	-	124745600	124766025	GPR37	2861	G protein-coupled receptor 37 (endothelin receptor type B-like)	GO:0005515|GO:0042277|GO:0005886|GO:0004930|GO:0031987|GO:0000151|GO:0008528|GO:0007193|GO:0045964|GO:0043235|GO:0042416|GO:0007186|GO:0005887|GO:0031072|GO:0005789|GO:0030544|GO:0043410|GO:0031625	.	NA	-	.	NA	NA	NA	NA	NA	NA	NA	NA	NA
LNCV6_140864_PI430048170	0.000189315	2.25055	12.6935	12.4774	12.5415	P	P	P	11.5011	11.3735	11.3301	P	P	P	LNCV6_140864_PI430048170	mRNA	TACACCAATTTGGTAAAAATGCTGCTCTCAGCCTCCCACAATTAAACCGCATGTGATCTC	NM_004104	RefSeq	chr17	-	82078337	82098230	FASN	2194	fatty acid synthase	GO:0005515|GO:0005886|GO:0015939|GO:0006767|GO:0044281|GO:0035338|GO:0070402|GO:0042803|GO:0005829|GO:0005739|GO:0005737|GO:0047117|GO:0008144|GO:0019432|GO:0006631|GO:0071353|GO:0006633|GO:0004313|GO:0004312|GO:0044255|GO:0070062|GO:0042470|GO:0016295|GO	.	NA	-	.	NA	NA	NA	NA	NA	NA	NA	NA	NA
LNCV6_136598_PI430048170	0.000594849	2.77059	6.1072	5.91975	5.87067	P	P	P	4.62699	4.56241	4.28639	P	P	P	LNCV6_136598_PI430048170	mRNA	GCAAGCTTTGAAAGGGGCCTTCCATACTTACTTAATTGAATATTCTGGGATATTGAAAAT	NM_001197220	RefSeq	chr5	-	58969040	59276119	PDE4D	5144	phosphodiesterase 4D, cAMP-specific, transcript variant 6	GO:0005515|GO:0010469|GO:0032754|GO:0010738|GO:0031698|GO:0030016|GO:0043623|GO:0006939|GO:0051117|GO:0007613|GO:0045822|GO:0031625|GO:0086004|GO:0006198|GO:0032729|GO:0005813|GO:0005794|GO:0007568|GO:0030593|GO:0005891|GO:0044325|GO:0008277|GO:0002027|GO	.	NA	-	.	NA	NA	NA	NA	NA	NA	NA	NA	NA
LNCV6_98420_PI430048170	0.0144031	2.09589	9.19213	9.00435	8.97585	P	P	P	7.72327	7.89118	8.30207	P	P	P	LNCV6_98420_PI430048170	mRNA	GAGGACACGTCGCACATTTAGAAGATGATGAAGGAGATGATGATGAATCTAAACACTCAA	NM_003618	RefSeq	chr2	-	39249265	39437312	MAP4K3	8491	mitogen-activated protein kinase kinase kinase kinase 3, transcript variant 1	GO:0005515|GO:0007254|GO:0005524|GO:0035556|GO:0005083|GO:0005737|GO:0050790|GO:0004672|GO:0004702|GO:0004674|GO:0006468|GO:0034612|GO:0009411	.	NA	-	.	NA	NA	NA	NA	NA	NA	NA	NA	NA
LNCV6_127961_PI430048170	0.000332914	0.0378782	0.917895	0.156207	0.216355	A	A	A	5.41795	4.94031	5.19043	P	P	P	LNCV6_127961_PI430048170	mRNA	GTGGTTTCAGATTGTAAATAGCGCGTCAGCGAACTTGTCTAAATCATATATTTTTGTCTA	NM_024337	RefSeq	chr5	+	3596053	3601403	IRX1	79192	iroquois homeobox 1	GO:0043565|GO:0006355|GO:0072272|GO:0005634|GO:0072086	.	NA	-	.	NA	NA	NA	NA	NA	NA	NA	NA	NA
LNCV6_133176_PI430048170	0.00591226	0.439582	8.01487	7.87223	7.65479	P	P	P	8.99985	9.07307	9.04796	P	P	P	LNCV6_133176_PI430048170	mRNA	TGGAGTTGAGATATCAGTCTCGGAAACTTCTGAAAAATGCTAATAATTACCCAAGGATTA	NM_173216	RefSeq	chr3	+	186930525	187078553	ST6GAL1	6480	ST6 beta-galactosamide alpha-2,6-sialyltranferase 1, transcript variant 1	GO:0008373|GO:0006054|GO:0016266|GO:0003835|GO:0030173|GO:0000139|GO:0006493|GO:0006959|GO:0032580|GO:0006488|GO:0044267|GO:0070062|GO:0018279|GO:0043687	.	NA	-	.	NA	NA	NA	NA	NA	NA	NA	NA	NA
LNCV6_133326_PI430048170	0.000417887	8.478	8.629	8.52925	8.523	P	P	P	5.66748	5.4313	5.31068	P	P	P	LNCV6_133326_PI430048170	mRNA	CGCAACTATGCTTAACATGGCGAAATGTATTAAACACTCGTCCAACTATTTATGAAATAC	NM_001173523	RefSeq	chr4	+	30720414	31146801	PCDH7	5099	protocadherin 7, transcript variant d	GO:0005886|GO:0005887|GO:0005509|GO:0007156	.	NA	-	.	NA	NA	NA	NA	NA	NA	NA	NA	NA
LNCV6_98787_PI430048170	0.00240781	2.09833	8.5018	8.17846	8.20562	P	P	P	7.29757	7.28142	7.11496	P	P	P	LNCV6_98787_PI430048170	mRNA	AGTTCCGTAACTTAGGACAAAATGAGCCTCACATGCCACTCAACGCCACTTTTCCAGATT	NM_005900	RefSeq	chr4	+	145481798	145559173	SMAD1	4086	SMAD family member 1, transcript variant 1	GO:0071773|GO:0005515|GO:0001657|GO:0003700|GO:0051216|GO:0001710|GO:0042802|GO:0005622|GO:0009880|GO:0000165|GO:0007179|GO:0019901|GO:0007276|GO:0010243|GO:0030509|GO:0000978|GO:0000979|GO:0060038|GO:0007183|GO:0043234|GO:0060348|GO:0050775|GO:0042060|GO	.	NA	-	.	NA	NA	NA	NA	NA	NA	NA	NA	NA
LNCV6_135944_PI430048170	0.000661479	0.175306	11.6332	11.6371	11.5571	P	P	P	14.1941	14.2224	13.931	P	P	P	LNCV6_135944_PI430048170	mRNA	GATTTGTAGGGTACTTGGCAGGTTAAATTAAACCAGAAGAGGTGACTTAATAAAAAAGGG	NM_006902	RefSeq	chr1	+	170664171	170739400	PRRX1	5396	paired related homeobox 1, transcript variant pmx-1a	GO:0042472|GO:0051216|GO:0003713|GO:0005730|GO:0002053|GO:0005634|GO:0048844|GO:0000122|GO:0030326|GO:0048701|GO:0043565|GO:0045880|GO:0071837|GO:0060021|GO:0042474	.	NA	-	.	NA	NA	NA	NA	NA	NA	NA	NA	NA
LNCV6_142536_PI430048170	0.000266675	4.55927	9.85663	9.6326	9.52862	P	P	P	7.51023	7.39257	7.56311	P	P	P	LNCV6_142536_PI430048170	mRNA	GCTATCCCAAACTCTCAGCCTCTGTGAATAAAGTTGTTTTTTCATTAACCTCTCAAAAAA	NM_005250	RefSeq	chr16	+	86578508	86581698	FOXL1	2300	forkhead box L1	GO:0003700|GO:0006357|GO:0006366|GO:0030111|GO:0008301|GO:0000981|GO:0005634|GO:0007275|GO:0003677|GO:0030166|GO:0043565|GO:0007507|GO:0061146|GO:0007495|GO:0009887	.	NA	-	.	NA	NA	NA	NA	NA	NA	NA	NA	NA
LNCV6_139912_PI430048170	0.00713079	2.7598	4.89884	4.45721	4.36577	P	P	P	3.11522	3.23173	3.03221	P	P	P	LNCV6_139912_PI430048170	mRNA	TATGCATCTACTTGGCAAGGTCATAGACAATTCCTCCAGAGACACTGAGCCAGTCTTTGA	NM_153281	RefSeq	chr3	-	50299888	50312381	HYAL1	3373	hyaluronoglucosaminidase 1, transcript variant 8	GO:0030308|GO:0051216|GO:0030307|GO:0036117|GO:0044281|GO:0005764|GO:0005615|GO:0071467|GO:0030207|GO:1900106|GO:0005737|GO:0006954|GO:0036120|GO:0001618|GO:0071356|GO:0030204|GO:0030203|GO:0046677|GO:0070062|GO:0045927|GO:0043202|GO:0050679|GO:0005975|GO	.	NA	-	.	NA	NA	NA	NA	NA	NA	NA	NA	NA
LNCV6_77745_PI430048170	0.000716536	424.954	10.8072	10.6234	10.7709	P	P	P	2.4163	2.00148	1.432	A	A	A	LNCV6_77745_PI430048170	mRNA	ATCCACCTGTCTATTTGCACATGGAGGACTTTTCAAGATGTCAGGATACCCTTCCATCAC	NM_198392	RefSeq	chr6	+	133889120	133895537	TCF21	6943	transcription factor 21, transcript variant 1	GO:0060426|GO:0001657|GO:0001658|GO:0042826|GO:0060425|GO:0005634|GO:0050681|GO:0048536|GO:0032835|GO:0007530|GO:0048608|GO:0072277|GO:0060008|GO:0060541|GO:0045944|GO:0030855|GO:0046983|GO:0060021|GO:0014707|GO:0060435|GO:0001944|GO:0048286|GO:0001822|GO	.	NA	-	.	NA	NA	NA	NA	NA	NA	NA	NA	NA
LNCV6_137147_PI430048170	0.00185878	0.341219	2.66802	2.96959	3.01403	P	P	P	4.18642	4.71202	4.38131	P	P	P	LNCV6_137147_PI430048170	mRNA	CAGCTGTTTCTAAACCCAGACACTGTTTGTAATAGACTGGAAATAAAATGTTCTTTCCTT	NM_173660	RefSeq	chr4	+	3463305	3494482	DOK7	285489	docking protein 7, transcript variant 1	GO:0031594|GO:0030054|GO:0019901|GO:0005886|GO:0007528|GO:0061098|GO:0005158|GO:0043113|GO:0035091	.	NA	-	.	NA	NA	NA	NA	NA	NA	NA	NA	NA
LNCV6_143869_PI430048170	0.0018258	0.47793	10.8358	10.6708	10.5436	P	P	P	11.8119	11.7687	11.6767	P	P	P	LNCV6_143869_PI430048170	mRNA	CAATGCTTCACATCATATTGTGCTGCAGTTTCCATCATTTTTAAAGGACAGAGACATAAA	NM_001142300	RefSeq	chr2	+	207711539	207756172	CCNYL1	151195	cyclin Y-like 1, transcript variant 1	GO:0019901|GO:0000079	.	NA	-	.	NA	NA	NA	NA	NA	NA	NA	NA	NA
LNCV6_115434_PI430048170	0.00238602	2.31262	9.71389	9.38819	9.31641	P	P	P	8.17597	8.21439	8.41931	P	P	P	LNCV6_115434_PI430048170	mRNA	CTCACTGGATGAACAAAGCAGTAGTACACTCAAGGGTGTGCTTGTGAGAAATGGAGGAAG	NM_001130445	RefSeq	chr2	+	181891715	181930737	SSFA2	6744	sperm specific antigen 2, transcript variant 1	GO:0005737|GO:0005886|GO:0005102|GO:0005654|GO:0005634|GO:0003779	.	NA	-	.	NA	NA	NA	NA	NA	NA	NA	NA	NA
LNCV6_145396_PI430048170	5.76815e-05	40.2759	10.0006	9.92822	9.88484	P	P	P	4.73484	4.64228	4.4263	P	P	P	LNCV6_145396_PI430048170	mRNA	GCAATACTGCACCTGGTGATCACAAAGATAATGTTCTACTTCTGATAGAAATAATTTCTC	NM_012082	RefSeq	chr8	+	105318918	105804539	ZFPM2	23414	zinc finger protein, FOG family member 2	GO:0005515|GO:0030324|GO:0045599|GO:0005634|GO:0007506|GO:0005737|GO:0003221|GO:0045944|GO:0048568|GO:0001085|GO:0060548|GO:2000195|GO:0001105|GO:0003714|GO:0060412|GO:0000122|GO:0003677|GO:0001701|GO:0006351|GO:0001078|GO:0007596|GO:0003148|GO:0005654|GO	.	NA	-	.	NA	NA	NA	NA	NA	NA	NA	NA	NA
LNCV6_140186_PI430048170	0.00379019	0.309088	9.37917	9.3083	8.98232	P	P	P	10.8812	10.9699	10.9293	P	P	P	LNCV6_140186_PI430048170	mRNA	GCTGCACAGTCAATTCATCGGTGCCTTAGTCCAAGAAAATAAAAACCACTAAGAAGCTTT	NM_001039792	RefSeq	chr9	+	35906191	35907141	HRCT1	646962	histidine rich carboxyl terminus 1	GO:0016021	.	NA	-	.	NA	NA	NA	NA	NA	NA	NA	NA	NA
LNCV6_126901_PI430048170	0.000464381	2.77741	6.71914	7.01591	6.80788	P	P	P	5.56074	5.35029	5.20459	P	P	P	LNCV6_126901_PI430048170	mRNA	GCTACCCACCTGTGTTTCTTAGCATTTCAGGAATTAAACCACATTCAGAACCCCAAAAAA	NM_005226	RefSeq	chr9	+	88991408	89005154	S1PR3	1903	sphingosine-1-phosphate receptor 3	GO:0008284|GO:0005886|GO:0004930|GO:0003376|GO:0001816|GO:0038036|GO:0007193|GO:0007204|GO:0009653|GO:0008289|GO:0005178|GO:0006954|GO:0007186|GO:0005887|GO:0032651	.	NA	-	.	NA	NA	NA	NA	NA	NA	NA	NA	NA
LNCV6_142859_PI430048170	0.0382456	2.81531	4.19167	4.21967	4.32266	P	P	P	3.07443	2.93657	2.04851	A	P	A	LNCV6_142859_PI430048170	mRNA	CGCGGTATATAGAGATATGCATTTTATTTTACTTGTGTAAAAATATCGGACGACGTGGAA	NM_023004	RefSeq	chr22	-	20241414	20268293	RTN4R	65078	reticulon 4 receptor	GO:0005515|GO:0048011|GO:0009986|GO:0005886|GO:0005783|GO:0050771|GO:0004872|GO:0031225|GO:0007409|GO:0050770|GO:0070062|GO:0030426	.	NA	-	.	NA	NA	NA	NA	NA	NA	NA	NA	NA
LNCV6_139825_PI430048170	0.000424676	0.194916	2.88456	3.17706	3.40852	P	P	P	5.52314	5.70429	5.34491	P	P	P	LNCV6_139825_PI430048170	mRNA	GGTGTCTCCAACTCCTACCCCATTGCATGGGTTGTTGCGGACATCCAATAAAGATTTTTT	NM_014571	RefSeq	chr1	-	39623430	39639676	HEYL	26508	hes-related family bHLH transcription factor with YRPW motif-like	GO:0071773|GO:0005515|GO:0000988|GO:0003700|GO:0000983|GO:0006366|GO:0072014|GO:0003181|GO:0003184|GO:0005634|GO:0035914|GO:0050683|GO:0032835|GO:0042803|GO:0060317|GO:0005737|GO:0007219|GO:0045944|GO:0014031|GO:0046982|GO:0003198|GO:0001106|GO:0060412|GO	.	NA	-	.	NA	NA	NA	NA	NA	NA	NA	NA	NA
LNCV6_51830_PI430048170	0.00156995	4.4517	10.2403	9.9457	10.1981	P	P	P	8.09864	8.16765	7.61072	P	P	P	LNCV6_51830_PI430048170	mRNA	TCAAAATGCTACGGCCTGTGACAATGCTCCAGAAGCCTGGGACCTGCTGCACAGAGTGCT	NM_000710	RefSeq	chr14	+	96256209	96264763	BDKRB1	623	bradykinin receptor B1	GO:0005515|GO:0043005|GO:0042277|GO:0004947|GO:0030308|GO:0005886|GO:0005783|GO:0045776|GO:0007204|GO:0007205|GO:0019233|GO:0009612|GO:0006954|GO:0016477|GO:0005887|GO:0002687|GO:0032496|GO:0001933|GO:0051281	.	NA	-	.	NA	NA	NA	NA	NA	NA	NA	NA	NA
LNCV6_80757_PI430048170	9.39535e-05	0.110629	3.50883	3.53379	3.69552	P	P	P	6.60392	6.68976	6.95643	P	P	P	LNCV6_80757_PI430048170	mRNA	TTCAATTTCGAACGTGGAACAGAGCAGGACATTTGCTTTTCGGCGAACTTCAACGTGGTT	NM_001201380	RefSeq	chr9	-	41891889	42129504	CNTNAP3B	728577	contactin associated protein-like 3B	GO:0016021|GO:0007155	.	NA	-	.	NA	NA	NA	NA	NA	NA	NA	NA	NA
LNCV6_132453_PI430048170	9.38863e-05	0.45221	5.72063	5.65642	5.76775	P	P	P	6.87448	6.82963	6.87716	P	P	P	LNCV6_132453_PI430048170	mRNA	TAAAGTAATGGAACTTTGATGATGCCTTTGCTGGGCATTATGTGTCCATGCCAGGGATGC	NM_033004	RefSeq	chr17	-	5514117	5584512	NLRP1	22861	NLR family, pyrin domain containing 1, transcript variant 1	GO:0005515|GO:0006919|GO:0072558|GO:0019904|GO:0050727|GO:0006915|GO:0005634|GO:0051402|GO:0005524|GO:0008656|GO:0035872|GO:0005829|GO:0005622|GO:0050718|GO:0045087|GO:0032495|GO:0019899|GO:0042742	.	NA	-	.	NA	NA	NA	NA	NA	NA	NA	NA	NA
LNCV6_133471_PI430048170	0.00103552	4.26033	11.4777	11.1648	11.2414	P	P	P	9.24131	9.23048	9.15648	P	P	P	LNCV6_133471_PI430048170	mRNA	GGTGGTGAAAACAAACCCCGTGTATCTCTCAATAAAGGTGGCCGAAGGGCCTCGATGTGG	NM_002531	RefSeq	chr20	+	62708836	62762771	NTSR1	4923	neurotensin receptor 1 (high affinity)	GO:0005515|GO:0008344|GO:0043066|GO:0005794|GO:0005886|GO:0004930|GO:0005783|GO:0007268|GO:0007186|GO:0005887|GO:0007218|GO:0045121|GO:0016492	.	NA	-	.	NA	NA	NA	NA	NA	NA	NA	NA	NA
LNCV6_126249_PI430048170	0.000252491	0.0749613	7.70572	7.60051	7.38344	P	P	P	11.3119	11.3522	11.2555	P	P	P	LNCV6_126249_PI430048170	mRNA	AAACACTGCAGGTGTATATAGATGCTTTCTGTCATACTGTGTTTTCAGATGCAGAATTTT	NM_022166	RefSeq	chr16	-	17102323	17470881	XYLT1	64131	xylosyltransferase I	GO:0034605|GO:0008375|GO:0030206|GO:0000139|GO:0005789|GO:0030158|GO:0005576|GO:0016021|GO:0015012|GO:0006024	.	NA	-	.	NA	NA	NA	NA	NA	NA	NA	NA	NA
LNCV6_144642_PI430048170	0.000135663	1211.26	12.7284	12.4813	12.5096	P	P	P	2.59483	1.85167	2.45615	A	A	P	LNCV6_144642_PI430048170	mRNA	GGAGAGAAGCTCTTCAATAGCTAAGCATCTCCTTACAGTCACTAATATAGTAGATTTTAA	NM_000689	RefSeq	chr9	-	72900661	72953317	ALDH1A1	216	aldehyde dehydrogenase 1 family, member A1	GO:0006805|GO:0001758|GO:0006069|GO:0004029|GO:0006081|GO:0004028|GO:0044281|GO:0005829|GO:0005099|GO:0005737|GO:0032320|GO:0042572|GO:0018479|GO:0005497|GO:0070062	.	NA	-	.	NA	NA	NA	NA	NA	NA	NA	NA	NA
LNCV6_139975_PI430048170	0.0260603	3.20902	3.56148	3.23764	2.91501	P	P	P	0.778577	1.63648	2.05113	A	A	A	LNCV6_139975_PI430048170	mRNA	TAAATGCTCAATAAATTGTAGCTGCCAGTGCCGGGCATTGCTCTTGGCATTTGCAAAAAA	NM_001042	RefSeq	chr17	+	7281734	7288048	SLC2A4	6517	solute carrier family 2 (facilitated glucose transporter), member 4	GO:0010021|GO:0005515|GO:0048471|GO:0005886|GO:0045471|GO:0030136|GO:0044281|GO:0055056|GO:0008645|GO:0005829|GO:0015758|GO:0046323|GO:0061024|GO:0030140|GO:0005355|GO:0070062|GO:0012506|GO:0032869|GO:0071470|GO:0005975|GO:0005771|GO:0071456|GO:0030315|GO	.	NA	-	.	NA	NA	NA	NA	NA	NA	NA	NA	NA
LNCV6_145205_PI430048170	0.00018425	12.1754	4.13818	4.27374	3.64862	P	P	P	0.686767	0.380293	0.206283	A	A	A	LNCV6_145205_PI430048170	mRNA	TGCTCTGTACCTGTCAAAAATTTTGAATGTACACCACATGCTATTGTCTGAACTTGAGTA	NM_030774	RefSeq	chr11	-	4680170	4697846	OR51E2	81285	olfactory receptor, family 51, subfamily E, member 2	GO:0071398|GO:0050911|GO:0004984|GO:0007186|GO:0005886|GO:0004930|GO:0043401|GO:0003707|GO:0038023|GO:0016021|GO:0045777|GO:1900135	.	NA	-	.	NA	NA	NA	NA	NA	NA	NA	NA	NA
LNCV6_135062_PI430048170	0.00161422	10.265	8.21659	8.19568	7.99025	P	P	P	4.78508	5.08934	4.37132	P	P	P	LNCV6_135062_PI430048170	mRNA	TCTCATCACTTGTATGTTTCTAACACAGCATGGGACTTTAATAAAACCATCCTGGAAACT	NM_001301056	RefSeq	chr1	+	212950519	212991585	VASH2	79805	vasohibin 2, transcript variant 4	GO:0005737|GO:0001938|GO:0045766	.	NA	-	.	NA	NA	NA	NA	NA	NA	NA	NA	NA
LNCV6_143420_PI430048170	0.00189493	0.0412245	0.0681406	0.822304	0.53686	A	A	A	5.05742	5.1644	5.10244	P	P	P	LNCV6_143420_PI430048170	mRNA	AATGTTCTGGGTGACCAGTCACCTACTTTCTGATCAATAAAAATGTCGACATGCATTTCT	NM_013358	RefSeq	chr1	+	17205125	17246006	PADI1	29943	peptidyl arginine deiminase, type I	GO:0018101|GO:0005737|GO:0005509|GO:0004668|GO:0070062	.	NA	-	.	NA	NA	NA	NA	NA	NA	NA	NA	NA
LNCV6_135885_PI430048170	0.0181137	0.445959	6.99653	6.64846	6.33801	P	P	P	7.93813	7.86297	7.74569	P	P	P	LNCV6_135885_PI430048170	mRNA	GGGCATGTGGAAATGGTCAGTTATATTCAGGCAATTAAAAAACCTAATTATATGGGGTTT	NM_001145434	RefSeq	chr19	+	52369916	52385793	ZNF880	400713	zinc finger protein 880	GO:0005622|GO:0006355|GO:0003700|GO:0003676|GO:0046872	.	NA	-	.	NA	NA	NA	NA	NA	NA	NA	NA	NA
LNCV6_139323_PI430048170	0.00777024	2.06395	7.84884	7.4934	7.47835	P	P	P	6.48855	6.6243	6.5992	P	P	P	LNCV6_139323_PI430048170	mRNA	TGTGGGTGGGGGACTAACTGCGCAATGTAGTTAGGTGCTCAATAAACGGAGTTGCCGCTG	NM_001301159	RefSeq	chr16	+	566994	569495	NHLRC4	283948	NHL repeat containing 4, transcript variant 1	NA	.	NA	-	.	NA	NA	NA	NA	NA	NA	NA	NA	NA
LNCV6_132744_PI430048170	0.019683	0.106524	1.74213	1.78162	0.318122	A	A	A	4.67878	4.61855	4.65563	P	P	P	LNCV6_132744_PI430048170	mRNA	AACACGCTTTCTTTACATCACTAGTGTAGACTCAAAAGATATGCAAGTGTCAAATATGCA	NM_004975	RefSeq	chr20	-	49371967	49482644	KCNB1	3745	potassium channel, voltage gated Shab related subfamily B, member 1	GO:0005251|GO:0005515|GO:0005886|GO:0007268|GO:0044281|GO:0030425|GO:0032809|GO:0015271|GO:0047485|GO:0006112|GO:0032590|GO:0050796|GO:0045211|GO:0008076|GO:0051260|GO:0034765|GO:0016021|GO:0071805	.	NA	-	.	NA	NA	NA	NA	NA	NA	NA	NA	NA
LNCV6_144049_PI430048170	0.00628521	2.57191	9.53697	9.30188	9.05701	P	P	P	8.00955	7.86483	7.96892	P	P	P	LNCV6_144049_PI430048170	mRNA	CCCTGTACCTGAACACTTGTTGCTGCCTCACAAGAAAATAGAACTTTTATGTTAAAAATA	NM_173511	RefSeq	chr2	+	202635177	202769757	FAM117B	150864	family with sequence similarity 117, member B	NA	.	NA	-	.	NA	NA	NA	NA	NA	NA	NA	NA	NA
LNCV6_143362_PI430048170	0.00060061	4.17966	15.1418	15.169	15.0112	P	P	P	13.1828	13.1016	12.829	P	P	P	LNCV6_143362_PI430048170	mRNA	GAGTATATAGGTTTTGTACCTTTTTTACAGGAAGGTGACTTTCTGTAACAATGCGATGTA	NM_002167	RefSeq	chr1	-	23557929	23559794	ID3	3399	inhibitor of DNA binding 3, dominant negative helix-loop-helix protein	GO:0005515|GO:0001656|GO:0003700|GO:0005634|GO:0045662|GO:0043433|GO:0007507|GO:0005737|GO:0030182|GO:0015630|GO:0030855|GO:0051726|GO:0046983|GO:0042476|GO:0006275|GO:0043065|GO:0003714|GO:0019904|GO:0009611|GO:0007275|GO:0000122|GO:0007417|GO:0006351|GO	.	NA	-	.	NA	NA	NA	NA	NA	NA	NA	NA	NA
LNCV6_52461_PI430048170	0.00662339	0.427417	4.20096	3.99966	3.59006	P	P	P	5.4161	5.13286	4.94694	P	P	P	LNCV6_52461_PI430048170	mRNA	TTTTGTTCTGTTTTTCTACAACACAGAGTACTGACTCTGCCTGGTTCCTGAGAGAGGCTC	NM_000929	RefSeq	chr1	+	20070207	20091901	PLA2G5	5322	phospholipase A2, group V	GO:0019370|GO:0048471|GO:0005794|GO:0005886|GO:0009986|GO:0036149|GO:0006663|GO:0005509|GO:0036148|GO:0005576|GO:0044281|GO:0051591|GO:0016042|GO:0036150|GO:0047498|GO:0006644|GO:0034097|GO:0006654|GO:0008201|GO:0036151|GO:0050482|GO:0046474|GO:0036152	.	NA	-	.	NA	NA	NA	NA	NA	NA	NA	NA	NA
LNCV6_134896_PI430048170	0.00594237	0.275897	2.17278	2.77928	2.95657	A	P	P	4.70993	4.29431	4.55886	P	P	P	LNCV6_134896_PI430048170	mRNA	GGCTCTTTTGTAAGGTTTTTGTAGTGATTTTTATGCCACCTGAATAAAGAATGAATGGGC	NM_001165920	RefSeq	chr17_KI270861v1_alt	+	171977	184214	SERPINF2	5345	serpin peptidase inhibitor, clade F (alpha-2 antiplasmin, pigment epithelium derived factor), member 2, transcript variant 2	GO:0005515|GO:0004866|GO:0004867|GO:0045597|GO:0046330|GO:0048514|GO:2000049|GO:0072562|GO:0002020|GO:0005615|GO:0042803|GO:0071636|GO:0030199|GO:0045944|GO:0031093|GO:0070374|GO:0070062|GO:0010033|GO:0009986|GO:0051918|GO:0005577|GO:0002034|GO:0030168|GO	.	NA	-	.	NA	NA	NA	NA	NA	NA	NA	NA	NA
LNCV6_136560_PI430048170	0.00875412	0.326479	6.33801	6.40152	6.4817	P	P	P	8.23211	8.11567	7.66108	P	P	P	LNCV6_136560_PI430048170	mRNA	GAGGGTTTTACTTCCTTGTTAACATATAAAGTTATAAATGAAGGACAAGGAGGAGATGGA	NM_014936	RefSeq	chr6	+	46129963	46146699	ENPP4	22875	ectonucleotide pyrophosphatase/phosphodiesterase 4 (putative)	GO:0016020|GO:0005886|GO:0030194|GO:0007596|GO:0046130|GO:0047710|GO:0016021|GO:0046872|GO:0070062	.	NA	-	.	NA	NA	NA	NA	NA	NA	NA	NA	NA
LNCV6_141577_PI430048170	0.00259853	0.223947	6.1813	5.8968	5.78679	P	P	P	8.09536	8.14245	8.13218	P	P	P	LNCV6_141577_PI430048170	mRNA	AGCCCAGTTGTAACTTGGTAAAGGCAAGCTTCTGTACCTTTGTTATAATTAATTGTATAC	NM_020911	RefSeq	chr7	-	132123331	132576564	PLXNA4	91584	plexin A4, transcript variant 1	GO:0021960|GO:0005886|GO:0021644|GO:0048485|GO:0002116|GO:0005622|GO:0021784|GO:0021793|GO:0050923|GO:0021615|GO:0048841|GO:0017154|GO:0007411|GO:0021637|GO:0071526|GO:0016021|GO:0021612	.	NA	-	.	NA	NA	NA	NA	NA	NA	NA	NA	NA
LNCV6_66763_PI430048170	0.000415787	3.64628	9.5646	9.19788	9.18216	P	P	P	7.38474	7.33036	7.64379	P	P	P	LNCV6_66763_PI430048170	mRNA	GGTCACCAGTGGGTCATAAATTGGCATATGTTTGGAACAATGACATTTATGTTAAAATTG	NM_001935	RefSeq	chr2	-	161992244	162074542	DPP4	1803	dipeptidyl-peptidase 4	GO:0005515|GO:0008284|GO:0005886|GO:0004252|GO:0031295|GO:0030139|GO:0005765|GO:0002020|GO:0010716|GO:0042803|GO:0042802|GO:0046581|GO:0016324|GO:0071438|GO:0006508|GO:0070062|GO:0001666|GO:0009986|GO:0031258|GO:0005102|GO:0033632|GO:0030027|GO:0042110|GO	.	NA	-	.	NA	NA	NA	NA	NA	NA	NA	NA	NA
LNCV6_134453_PI430048170	0.033717	0.458371	2.54101	2.91918	2.30437	A	P	A	4.16106	3.23151	3.66598	P	P	P	LNCV6_134453_PI430048170	mRNA	TTCTAATCTGTCTGCTCCTTGTTCTACGGATTCCAAACCAAAAGAGGCAAGCAAGTCTGC	NM_001291470	RefSeq	chr17_KI270909v1_alt	+	165199	167015	CCL4L2	9560	chemokine (C-C motif) ligand 4-like 2, transcript variant CCL4L2b2	NA	.	NA	-	.	NA	NA	NA	NA	NA	NA	NA	NA	NA
LNCV6_134168_PI430048170	0.000932141	0.101005	7.22368	7.15514	6.83718	P	P	P	10.3669	10.4324	10.3669	P	P	P	LNCV6_134168_PI430048170	mRNA	CTTGACTTTCTTCTGTGCACCTGATGGGAGGGTAATGTCTAATGTATTATCAATAACAAT	NM_016816	RefSeq	chr12	+	112906933	112919907	OAS1	4938	2'-5'-oligoadenylate synthetase 1, 40/46kDa, transcript variant 1	GO:0003725|GO:0005515|GO:0035457|GO:0005783|GO:0001730|GO:0019221|GO:0005576|GO:0005634|GO:0042593|GO:0009615|GO:0051259|GO:0005524|GO:0046872|GO:0005829|GO:0005739|GO:0051607|GO:0005737|GO:0060337|GO:0006006|GO:0008270|GO:0060700|GO:0060333|GO:0045071|GO	.	NA	-	.	NA	NA	NA	NA	NA	NA	NA	NA	NA
LNCV6_103824_PI430048170	0.0214675	0.475403	4.60408	4.47297	3.94121	P	P	P	5.281	5.52505	5.49994	P	P	P	LNCV6_103824_PI430048170	mRNA	GAGCAGTCTCTGGACAAGATGACCACACTCCAGGAATGCCAGTGCATCTTTTGCACAGCT	NM_182757	RefSeq	chr6	+	18387349	18468874	RNF144B	255488	ring finger protein 144B	GO:0005515|GO:0005737|GO:0004842|GO:0031966|GO:0042787|GO:0016874|GO:0006915|GO:0000151|GO:0008270|GO:0016021	.	NA	-	.	NA	NA	NA	NA	NA	NA	NA	NA	NA
LNCV6_137537_PI430048170	7.66578e-05	31.4583	9.01476	8.99406	8.89349	P	P	P	3.79933	4.1338	4.02605	P	P	P	LNCV6_137537_PI430048170	mRNA	ACTGCCTTTATTGTCCTTTTTGATACGAAGATGTGCTTTTTCTAGATGGAAAAGATGTGT	NM_005618	RefSeq	chr6_KI270798v1_alt	-	9443	17847	DLL1	28514	delta-like 1 (Drosophila)	GO:0005515|GO:0007368|GO:0007386|GO:0007220|GO:0005886|GO:0072014|GO:0001757|GO:0032693|GO:0007267|GO:0005112|GO:0070986|GO:0030155|GO:0030154|GO:0001947|GO:0007219|GO:0045638|GO:0045944|GO:0097150|GO:0030097|GO:0045747|GO:0048839|GO:0001709|GO:0005509|GO	.	NA	-	.	NA	NA	NA	NA	NA	NA	NA	NA	NA
LNCV6_141483_PI430048170	0.00035854	2.18407	7.47206	7.22757	7.41235	P	P	P	6.3706	6.15361	6.20893	P	P	P	LNCV6_141483_PI430048170	mRNA	GGAAAAATAAAAGTTGACTGTACTAAAAATGTATACTTGTTGCCAGGAAGGTGACCTCAA	NM_000676	RefSeq	chr17	+	15944916	15975896	ADORA2B	136	adenosine A2b receptor	GO:0032755|GO:0007588|GO:0005886|GO:0007254|GO:0032722|GO:0010575|GO:0060087|GO:0043306|GO:0000187|GO:0001609|GO:0007190|GO:0006968|GO:0001973|GO:0007186|GO:0005887|GO:0031668|GO:0031284|GO:0007189|GO:0002882	.	NA	-	.	NA	NA	NA	NA	NA	NA	NA	NA	NA
LNCV6_144457_PI430048170	0.00128994	2.30884	9.71653	9.59759	9.42678	P	P	P	8.479	8.48144	8.14887	P	P	P	LNCV6_144457_PI430048170	mRNA	GTCATTTCAGGTAAATATGACAAGTGGTGGAGCATGAAGTTTTCTAATTTGACTTAATCC	NM_173653	RefSeq	chr3	-	143265221	143848531	SLC9A9	285195	solute carrier family 9, subfamily A (NHE9, cation proton antiporter 9), member 9	GO:0005515|GO:0015385|GO:0031902|GO:0035725|GO:0016021|GO:0055037|GO:0055085|GO:0006885|GO:0006811	.	NA	-	.	NA	NA	NA	NA	NA	NA	NA	NA	NA
LNCV6_136856_PI430048170	0.00246673	2.26523	9.58817	9.49807	9.53915	P	P	P	8.35945	8.49967	8.21464	P	P	P	LNCV6_136856_PI430048170	mRNA	CTTACAGAAGAATGTCAAGGACTTAATGGTGCAAGCTGGCATTGAAAATTCTATTAAAGA	NM_001136180	RefSeq	chr18	+	79964581	79970822	HSBP1L1	440498	heat shock factor binding protein 1-like 1	NA	.	NA	-	.	NA	NA	NA	NA	NA	NA	NA	NA	NA
LNCV6_136810_PI430048170	1.35163e-07	0.00287911	2.5114	2.46025	2.28332	A	P	A	10.7625	10.8616	10.9548	P	P	P	LNCV6_136810_PI430048170	mRNA	CTGTTTCTAAGTGCCAAGCACAGAAAGCCGCTAAATAAAATCTTTGCAATTGTTTTCAAA	NM_152380	RefSeq	chr1	-	118883042	118989556	TBX15	6913	T-box 15	GO:0000976|GO:0003700|GO:0046982|GO:0001106|GO:0070722|GO:0000122|GO:0048701|GO:0042803|GO:0006351	.	NA	-	.	NA	NA	NA	NA	NA	NA	NA	NA	NA
LNCV6_135438_PI430048170	0.00761496	2.34242	12.4156	12.067	11.8723	P	P	P	10.7966	10.8739	11.0426	P	P	P	LNCV6_135438_PI430048170	mRNA	CCTACTGTAATATGCACCCATCTCATCCACGTAGTAAAGTGAACTTAAAAATTCAATCAA	NM_015894	RefSeq	chr20	-	63639704	63653610	STMN3	50861	stathmin-like 3, transcript variant 1	GO:0043005|GO:0030424|GO:0005794|GO:0035021|GO:0031110|GO:0019904|GO:0031122|GO:0031175|GO:0007399|GO:0030426|GO:0005737|GO:0032314|GO:0051493|GO:0015631|GO:0007019	.	NA	-	.	NA	NA	NA	NA	NA	NA	NA	NA	NA
LNCV6_137546_PI430048170	0.00725923	18.5449	6.04821	6.03353	5.88417	P	P	P	1.779	2.2965	0.956711	A	A	A	LNCV6_137546_PI430048170	mRNA	CCATGAGACCACTGTTATCAAAACTTTCTTTTCTGGAATGTAATCAATGTTTCTTCTAGG	NM_000575	RefSeq	chr2	-	112773914	112785394	IL1A	3552	interleukin 1, alpha	GO:0005515|GO:0008285|GO:0008283|GO:0019221|GO:0046330|GO:0050715|GO:0005615|GO:0035234|GO:0005829|GO:0034605|GO:0006955|GO:0006954|GO:0045944|GO:2001240|GO:0001660|GO:0070374|GO:0043123|GO:0005149|GO:0005507|GO:0006915|GO:0005576|GO:0002248|GO:0045840|GO	.	NA	-	.	NA	NA	NA	NA	NA	NA	NA	NA	NA
LNCV6_138083_PI430048170	0.00142426	0.466014	11.2664	10.9769	10.9447	P	P	P	12.0905	12.051	12.3542	P	P	P	LNCV6_138083_PI430048170	mRNA	TGCTCCGGCATTCAGTACCTGCTTCTTCCAGAGAAATAAAGTTAGTTTCTATTTTATGTT	NM_005781	RefSeq	chr3	-	195863364	195909009	TNK2	10188	tyrosine kinase, non-receptor, 2, transcript variant 1	GO:0005515|GO:0030424|GO:0005154|GO:0005886|GO:0007264|GO:0030136|GO:0050731|GO:0005634|GO:0051427|GO:0046872|GO:0030154|GO:0030425|GO:0030426|GO:0005737|GO:0005912|GO:0042127|GO:2000369|GO:0043025|GO:0038083|GO:0030659|GO:0070436|GO:0050699|GO:0043086|GO	.	NA	-	.	NA	NA	NA	NA	NA	NA	NA	NA	NA
LNCV6_142357_PI430048170	1.99207e-05	4.74753	9.89611	9.75912	9.65503	P	P	P	7.49591	7.6412	7.43388	P	P	P	LNCV6_142357_PI430048170	mRNA	ACTACTGAGAGTATTGTATCTGTTCTGGTAACCATGTACAGAATGTGAAACTGTCTTATG	NM_032717	RefSeq	chr4	+	83536316	83605874	AGPAT9	84803	1-acylglycerol-3-phosphate O-acyltransferase 9, transcript variant 1	GO:0032006|GO:0005783|GO:0004366|GO:0044281|GO:0003841|GO:0005789|GO:0016024|GO:0019432|GO:0016021|GO:0006644|GO:0006654|GO:0044255|GO:0046474	.	NA	-	.	NA	NA	NA	NA	NA	NA	NA	NA	NA
LNCV6_133820_PI430048170	0.0019951	0.408731	14.7731	14.475	14.3172	P	P	P	15.7275	15.6769	16.0429	P	P	P	LNCV6_133820_PI430048170	mRNA	TAGGCCCAGTCGTCATCAGATGCTTGCGGCAAAAGGAAAGCTGTGTTTATATGGAAGAAA	NM_000104	RefSeq	chr2	-	38067602	38076181	CYP1B1	1545	cytochrome P450, family 1, subfamily B, polypeptide 1	GO:0033629|GO:0019369|GO:0006725|GO:0070301|GO:0006805|GO:0008285|GO:0048514|GO:0044281|GO:0006809|GO:0005739|GO:0004497|GO:0042574|GO:0030199|GO:0042572|GO:0016712|GO:0007155|GO:0008202|GO:0030336|GO:0046466|GO:0043065|GO:0070330|GO:0005506|GO:0019373|GO	.	NA	-	.	NA	NA	NA	NA	NA	NA	NA	NA	NA
LNCV6_133694_PI430048170	0.00359204	2.24311	5.45074	5.89266	5.6433	P	P	P	4.36563	4.5454	4.60289	P	P	P	LNCV6_133694_PI430048170	mRNA	AAGATTTAGAGAAGCACTTTTTTGCCTTTATTGATGCCCTTGCACAGTCAGGCCAGGAGG	NM_001105577	RefSeq	chr13	-	27978105	27988637	URAD	NA	ureidoimidazoline (2-oxo-4-hydroxy-4-carboxy-5-) decarboxylase	NA	.	NA	-	.	NA	NA	NA	NA	NA	NA	NA	NA	NA
LNCV6_128619_PI430048170	0.00332103	0.254602	2.78974	2.68388	3.13789	P	P	P	4.91568	4.84482	4.81004	P	P	P	LNCV6_128619_PI430048170	mRNA	CCTCTGGTTCAAACCTTCGCGTGGCATTTTCACATTATTTAAAAAAGACAAAAACAACTT	NM_001080434	RefSeq	chr19	-	48485270	48513189	LMTK3	114783	lemur tyrosine kinase 3	GO:0003674|GO:0004674|GO:0010923|GO:0006468|GO:0016021|GO:0005575|GO:0005524	.	NA	-	.	NA	NA	NA	NA	NA	NA	NA	NA	NA
LNCV6_137078_PI430048170	0.00480048	3.28197	7.20845	7.60375	7.60305	P	P	P	5.94213	5.96884	5.30216	P	P	P	LNCV6_137078_PI430048170	mRNA	CCCCTCCACTGTCACATTGTAACTGAACTTCAGGATAATAAAGTGTTTGCCTCCAAAAAA	NM_000759	RefSeq	chr17	+	40015360	40017813	CSF3	1440	colony stimulating factor 3 (granulocyte), transcript variant 1	GO:0051897|GO:0008284|GO:0019221|GO:0005130|GO:2000251|GO:0050731|GO:0007275|GO:0014068|GO:0042993|GO:0005125|GO:0005615|GO:0032092|GO:0033138|GO:0006955|GO:0071222|GO:0045639|GO:0030838|GO:0071345|GO:0045944|GO:0030851|GO:0019899|GO:0008083	.	NA	-	.	NA	NA	NA	NA	NA	NA	NA	NA	NA
LNCV6_139104_PI430048170	0.000333099	0.3601	6.05378	6.09405	5.79422	P	P	P	7.53835	7.52387	7.30695	P	P	P	LNCV6_139104_PI430048170	mRNA	CTCTCTGAGTAAAAACTCATACATGCAGAAAATTGTCTTTGCTCGAAATGATAATGCCAA	NM_144649	RefSeq	chr8	-	132709945	132760668	TMEM71	137835	transmembrane protein 71, transcript variant 1	GO:0016021	.	NA	-	.	NA	NA	NA	NA	NA	NA	NA	NA	NA
LNCV6_135549_PI430048170	0.000309054	3.45753	7.33392	7.51257	7.12581	P	P	P	5.73684	5.47091	5.3988	P	P	P	LNCV6_135549_PI430048170	mRNA	TCCTTGACAAAATCCAGCTTTTGTATGAGGACTATAGGGTGAATTCTCTGATTAGTAATT	NM_001170423	RefSeq	chr6	+	83512474	83525702	PRSS35	167681	protease, serine, 35, transcript variant 1	GO:0005739|GO:0008152|GO:0005576|GO:0003824	.	NA	-	.	NA	NA	NA	NA	NA	NA	NA	NA	NA
LNCV6_134594_PI430048170	0.00766746	0.21473	4.59845	4.65407	3.95483	P	P	P	6.69181	6.55918	6.70883	P	P	P	LNCV6_134594_PI430048170	mRNA	TGCACCTTTGTGCCAAGAAAGGCCTATGAAAAGTAAACACTGACTTTTGAAAGCAAAAAA	NM_014443	RefSeq	chr5	-	149374266	149379275	IL17B	27190	interleukin 17B	GO:1900017|GO:0006955|GO:0006954|GO:0007267|GO:0005615|GO:0005125	.	NA	-	.	NA	NA	NA	NA	NA	NA	NA	NA	NA
LNCV6_137597_PI430048170	0.0160847	0.437119	2.71134	2.18013	2.91514	P	A	P	3.82109	4.13915	3.43999	P	P	P	LNCV6_137597_PI430048170	mRNA	CCAGCAGGAGTGGAGTTTGGTTTACTGATTTTACTGTTTTGTGTTCATGAATCTTTATTT	NM_017878	RefSeq	chr11	-	63552769	63563383	HRASLS2	54979	HRAS-like suppressor 2	GO:0016042|GO:0005737|GO:0016746|GO:0016787|GO:0016021	.	NA	-	.	NA	NA	NA	NA	NA	NA	NA	NA	NA
LNCV6_133852_PI430048170	6.87876e-05	2.5069	11.0971	11.1752	11.0275	P	P	P	9.70822	9.72898	9.88239	P	P	P	LNCV6_133852_PI430048170	mRNA	CCCAAGTTTACAGCTTGTACTTTACTTTAATGTGTAATACTCAACTCAAGGTACAAGACA	NM_001303253	RefSeq	chr6	+	159762478	159779112	ACAT2	39	acetyl-CoA acetyltransferase 2, transcript variant 2	GO:0006629|GO:0005737|GO:0005730|GO:0003985|GO:0005654|GO:0005634|GO:0070062	.	NA	-	.	NA	NA	NA	NA	NA	NA	NA	NA	NA
LNCV6_132044_PI430048170	0.0193599	0.0631782	0.330752	0.270835	0.257039	A	A	A	3.58028	3.46762	5.12495	P	P	P	LNCV6_132044_PI430048170	mRNA	TGAAGGACAAAATACAGATCCCAAGCTAAATCCCAAGGATGACGGCATCGTCTATGCTTC	NM_013439	RefSeq	chr7	+	100373444	100400099	PILRA	29992	paired immunoglobin-like type 2 receptor alpha, transcript variant 1	GO:0005515|GO:0007165|GO:0005886|GO:0016032|GO:0016021|GO:0070062	.	NA	-	.	NA	NA	NA	NA	NA	NA	NA	NA	NA
LNCV6_127206_PI430048170	0.00330164	0.482784	13.7084	13.565	13.402	P	P	P	14.5634	14.6726	14.6053	P	P	P	LNCV6_127206_PI430048170	mRNA	GCTTTTATGATATTTGTGTGCAATATCCCCTCTTCCATTGAGGATATTTGATGTAAAGGA	NM_005909	RefSeq	chr5	+	72107290	72209570	MAP1B	4131	microtubule-associated protein 1B	GO:0005515|GO:0008017|GO:0032387|GO:0030054|GO:0005886|GO:0009987|GO:0001578|GO:0005875|GO:0005874|GO:0045773|GO:0014069|GO:0048675|GO:0016358|GO:0005829|GO:0005737|GO:0047497|GO:0043197|GO:0005198|GO:0061162	.	NA	-	.	NA	NA	NA	NA	NA	NA	NA	NA	NA
LNCV6_133374_PI430048170	9.48024e-05	0.271606	8.90295	8.8001	8.63359	P	P	P	10.7561	10.5702	10.6583	P	P	P	LNCV6_133374_PI430048170	mRNA	GAACTTTGCTATTCATGTGAGCCAGACATAAAGTGCCGTACCTTTATTGCTTCCAAAAAA	NM_006851	RefSeq	chr12	+	75480732	75501936	GLIPR1	11010	GLI pathogenesis-related 1	GO:0016020|GO:0005886|GO:0005576|GO:0044281|GO:0016021|GO:0044255	.	NA	-	.	NA	NA	NA	NA	NA	NA	NA	NA	NA
LNCV6_138804_PI430048170	0.000694987	3.69863	6.76021	7.24223	7.0975	P	P	P	5.19442	5.30905	4.95459	P	P	P	LNCV6_138804_PI430048170	mRNA	TATAAGGTACAGTAAAAGCGTCTGAAAAATGCATTCAAAACACAGATTCTGGGGCCCTCG	NM_032040	RefSeq	chr19	-	46410328	46413662	CCDC8	83987	coiled-coil domain containing 8	GO:0007088|GO:0005813|GO:0005737|GO:0005886|GO:0010923|GO:0000226	.	NA	-	.	NA	NA	NA	NA	NA	NA	NA	NA	NA
LNCV6_137134_PI430048170	0.00045057	24.1281	7.74833	7.41633	7.35341	P	P	P	3.14952	3.10241	2.40782	P	P	A	LNCV6_137134_PI430048170	mRNA	CTGCCTTCTCAACTCCAAACTGACTCTTAAGAAGACTGCATTATATTTATTACTGTAAGA	NM_000492	RefSeq	chr7	+	117479962	117668664	CFTR	1080	cystic fibrosis transmembrane conductance regulator (ATP-binding cassette sub-family C, member 7)	GO:0005515|GO:0030321|GO:0006695|GO:0043627|GO:0005886|GO:0030324|GO:0043434|GO:0030301|GO:0031205|GO:0005254|GO:0032870|GO:0016323|GO:0005737|GO:0016324|GO:0015108|GO:0045909|GO:0042311|GO:0015106|GO:0006810|GO:0006833|GO:0034097|GO:0030659|GO:0070062|GO	.	NA	-	.	NA	NA	NA	NA	NA	NA	NA	NA	NA
LNCV6_129921_PI430048170	4.67233e-05	0.31763	10.2569	10.2129	10.1116	P	P	P	11.8233	11.829	11.8956	P	P	P	LNCV6_129921_PI430048170	mRNA	CCCTCCTACCCAATTCTATGGAATATTTTATACGTCTCCTTGTTTAAAATGTCACTGCTT	NM_001039348	RefSeq	chr2	-	55865961	55924163	EFEMP1	2202	EGF containing fibulin-like extracellular matrix protein 1, transcript variant 2	GO:0005515|GO:0005154|GO:0006355|GO:0005509|GO:0005578|GO:0005576|GO:0018108|GO:0005615|GO:0031012|GO:0005006|GO:0007173|GO:0030198|GO:0032331|GO:0007601|GO:0008083|GO:0070062	.	NA	-	.	NA	NA	NA	NA	NA	NA	NA	NA	NA
LNCV6_132410_PI430048170	0.0049924	0.293132	1.62798	0.974551	1.02245	A	A	A	3.10554	3.29527	2.52441	P	P	P	LNCV6_132410_PI430048170	mRNA	ACCAGCGGGGTGCTTGCCATTCTGAAGATAATAAAATGAATGTGTTGCAAATTGAAAAAA	NM_016379	RefSeq	chrX	-	6533617	6535118	VCX3A	51481	variable charge, X-linked 3A	GO:0007420|GO:0005730|GO:0005634	.	NA	-	.	NA	NA	NA	NA	NA	NA	NA	NA	NA
LNCV6_135836_PI430048170	0.000800081	3.23102	11.2743	11.212	11.0447	P	P	P	9.52614	9.47609	9.46156	P	P	P	LNCV6_135836_PI430048170	mRNA	GCTCAATCCTTAAGAATACATGGTTCATACAACATGCTTTTACTATGTCTTAAGTGTGAC	NM_003619	RefSeq	chr4	-	118280037	118352767	PRSS12	8492	protease, serine, 12 (neurotrypsin, motopsin)	GO:0030424|GO:0004252|GO:0005886|GO:0005576|GO:0043083|GO:0031410|GO:0006887|GO:0006898|GO:0030425|GO:0043195|GO:0006508|GO:0008236|GO:0031638|GO:0005044	.	NA	-	.	NA	NA	NA	NA	NA	NA	NA	NA	NA
LNCV6_143106_PI430048170	0.000922878	0.188881	3.09238	2.56281	2.83342	P	P	A	5.39066	5.2006	5.14765	P	P	P	LNCV6_143106_PI430048170	mRNA	TGCCTCCTCAGGTATGGCAGTGACTCACCTGGTTTTAATAAAACAACCTGCAACATCTCA	NM_203377	RefSeq	chr22	-	35606763	35623354	MB	4151	myoglobin, transcript variant 2	GO:0001666|GO:0042542|GO:0005506|GO:0043353|GO:0015671|GO:0007507|GO:0019825|GO:0050873|GO:0005344|GO:0031444|GO:0009725|GO:0020037|GO:0070062	.	NA	-	.	NA	NA	NA	NA	NA	NA	NA	NA	NA
LNCV6_145716_PI430048170	0.000211425	0.133483	9.69057	9.66615	9.40912	P	P	P	12.5685	12.4777	12.4492	P	P	P	LNCV6_145716_PI430048170	mRNA	CTTTGTATATATACTTATATCACGTAGGATGTAAAACCAGTATGACCTTGTCTAGTCTCC	NM_005711	RefSeq	chr5	-	83940594	84384867	EDIL3	10085	EGF-like repeats and discoidin I-like domains 3, transcript variant 1	GO:0005178|GO:0010811|GO:0005509|GO:0007275|GO:0007155|GO:0031982|GO:0070062	.	NA	-	.	NA	NA	NA	NA	NA	NA	NA	NA	NA
LNCV6_132553_PI430048170	5.37842e-05	13.026	11.59	11.5083	11.3528	P	P	P	7.89182	7.88858	7.54375	P	P	P	LNCV6_132553_PI430048170	mRNA	GAAGGATTCAGGAAGAAGAAAACTCAACTCAGTGCCATTTTACGAATATATGCGTTTATA	NM_001243539	RefSeq	chr10	-	5952370	5978187	IL15RA	3601	interleukin 15 receptor, alpha, transcript variant 3	GO:0005515|GO:0007165|GO:0031965|GO:0004896|GO:0000139|GO:0008283|GO:0019221|GO:0005789|GO:0016021|GO:0004871|GO:0005615|GO:0030659	.	NA	-	.	NA	NA	NA	NA	NA	NA	NA	NA	NA
LNCV6_132213_PI430048170	0.00275845	2.32465	6.00769	5.81284	5.58098	P	P	P	4.45469	4.85265	4.43497	P	P	P	LNCV6_132213_PI430048170	mRNA	CGAAAGAAGTCTGTATGAAAATCAGTTCTTTGCTGACACAAGTTCCATTTGTTACAAATG	NM_002839	RefSeq	chr9	-	8314245	10612723	PTPRD	5789	protein tyrosine phosphatase, receptor type, D, transcript variant 1	GO:0005515|GO:0005102|GO:0006796|GO:0035335|GO:0097105|GO:0006470|GO:0005001|GO:0005887|GO:0030182|GO:0050775|GO:0007185|GO:0050839|GO:0007157|GO:0070062	.	NA	-	.	NA	NA	NA	NA	NA	NA	NA	NA	NA
LNCV6_143256_PI430048170	0.000199304	0.0569475	0.494749	0.365235	0.651918	A	A	A	4.81288	4.76117	4.30219	P	P	P	LNCV6_143256_PI430048170	mRNA	GCCTAGATGCAGAGAGCTGCTATACATGTGAAAAGTAAAGTGGTGACATGAAACTAGAAA	NM_203412	RefSeq	chr1	+	110112439	110113947	UBL4B	164153	ubiquitin-like 4B	GO:0005737	.	NA	-	.	NA	NA	NA	NA	NA	NA	NA	NA	NA
LNCV6_142996_PI430048170	0.00681439	4.86563	6.8277	7.48889	7.52292	P	P	P	4.95148	5.1467	4.98625	P	P	P	LNCV6_142996_PI430048170	mRNA	AACTAGTATGAAAGGGTTATAAAGTAACAGAGGAAAACGCCTCTTGGTCCCTTTAAAAAA	NM_001165035	RefSeq	chr3	+	13568739	13638422	FBLN2	2199	fibulin 2, transcript variant 3	GO:0031012|GO:0030198|GO:0010811|GO:0005509|GO:0050840|GO:0005578|GO:0005576|GO:0031982|GO:0070062|GO:0005201	.	NA	-	.	NA	NA	NA	NA	NA	NA	NA	NA	NA
LNCV6_130023_PI430048170	0.00539975	2.55845	6.12869	6.20088	5.8127	P	P	P	4.75676	4.65615	4.69053	P	P	P	LNCV6_130023_PI430048170	mRNA	GCTTTCCATAAATTCATTGCTTATGTAAAGTTTTGTCCTGTTGTGACTATGCTGTTGAAC	NM_198152	RefSeq	chr3	-	191267154	191330536	UTS2B	257313	urotensin 2B	GO:0042312|GO:0001664|GO:0005179|GO:0008217|GO:0005576	.	NA	-	.	NA	NA	NA	NA	NA	NA	NA	NA	NA
LNCV6_120720_PI430048170	0.00053835	0.428736	6.75298	6.6257	6.44642	P	P	P	7.96865	7.82741	7.6982	P	P	P	LNCV6_120720_PI430048170	mRNA	CTGACAAATGTGTATCGGATGCTTTTGTTCAGGGCTGTGATCGGCCTGGGGAAATAATAA	NM_002983	RefSeq	chr17_KI270909v1_alt	-	149003	150906	CCL3	6348	chemokine (C-C motif) ligand 3	GO:0005515|GO:0019722|GO:0051928|GO:0008360|GO:0006887|GO:0005615|GO:0042802|GO:0005622|GO:0031726|GO:0043525|GO:0006935|GO:0000165|GO:0016301|GO:0071356|GO:0007610|GO:0070374|GO:0031663|GO:0008009|GO:0030335|GO:0032760|GO:0023052|GO:0030593|GO:0071621|GO	.	NA	-	.	NA	NA	NA	NA	NA	NA	NA	NA	NA
LNCV6_144441_PI430048170	0.00226657	0.49096	9.12835	9.28475	9.43405	P	P	P	10.3298	10.3752	10.2337	P	P	P	LNCV6_144441_PI430048170	mRNA	AGGGGCGCTCGCTTCCGCATCCTAGTCTCTATCATTAAAGTTCTAGTGACCGAGAAAAAA	NM_145867	RefSeq	chr5	+	179793984	179796512	LTC4S	4056	leukotriene C4 synthase	GO:0005515|GO:0019369|GO:0019370|GO:0005783|GO:0019372|GO:0044281|GO:0005635|GO:0043085|GO:0004364|GO:0004464|GO:0006691|GO:0043231|GO:0008289|GO:0004602|GO:0005640|GO:0005789|GO:2001300|GO:0016021|GO:0008047|GO:0055114	.	NA	-	.	NA	NA	NA	NA	NA	NA	NA	NA	NA
LNCV6_130842_PI430048170	0.00190274	3.27262	11.0466	10.9507	10.7376	P	P	P	9.24659	9.17727	9.19587	P	P	P	LNCV6_130842_PI430048170	mRNA	CCTTCAACACTGGACACGTCGAGCATTTTGTAGCTTAATTAAACCTCATGTAAGGCCAAA	NM_001005339	RefSeq	chr10	-	119499826	119542710	RGS10	6001	regulator of G-protein signaling 10, transcript variant 1	GO:0043547|GO:0005737|GO:0043197|GO:0005886|GO:0043025|GO:0038032|GO:0043679|GO:0005634|GO:0005096	.	NA	-	.	NA	NA	NA	NA	NA	NA	NA	NA	NA
LNCV6_130254_PI430048170	0.00958446	3.65226	3.13646	4.10153	3.93877	P	P	P	1.58565	1.64216	2.37408	A	A	A	LNCV6_130254_PI430048170	mRNA	GAAGAAGGTGAAAAGCAATCACAGTGTTAAAAGAAGACACGTTGAAATGATGCAGGCTGC	NM_012196	RefSeq	chrX	+	49331625	49338952	GAGE8	NA	-	NA	.	NA	-	.	NA	NA	NA	NA	NA	NA	NA	NA	NA
LNCV6_129469_PI430048170	0.00396422	8.39181	3.62964	4.09984	3.51788	P	P	P	1.30039	0.340857	0.206283	A	A	A	LNCV6_129469_PI430048170	mRNA	CATGTGAGCACTTTTGAGAAAGAGAAACCTATAGCAACTTCATGAATTAAGCCTTTTTCT	NM_021796	RefSeq	chrX	-	134565842	134658483	PLAC1	10761	placenta-specific 1	GO:0003674|GO:0090214|GO:0005576|GO:0005575|GO:0001890	.	NA	-	.	NA	NA	NA	NA	NA	NA	NA	NA	NA
LNCV6_95602_PI430048170	0.00582501	0.492068	9.16177	8.85401	9.18667	P	P	P	10.0484	10.0736	10.17	P	P	P	LNCV6_95602_PI430048170	mRNA	CCGCCAAGAAGCAGGAATTAGAAGAGATCTGCCATGACCTAGAGGCCAGGGTGGAGGAGG	NM_002473	RefSeq	chr22	-	36281276	36388067	MYH9	4627	myosin, heavy chain 9, non-muscle	GO:0005515|GO:0005516|GO:0031594|GO:0042641|GO:0008360|GO:0031032|GO:0038032|GO:0050900|GO:0015031|GO:0042803|GO:0000910|GO:0051015|GO:0007411|GO:0006509|GO:0070062|GO:0008305|GO:0031532|GO:0005819|GO:0007520|GO:0001701|GO:0043234|GO:0043534|GO:0043531|GO	.	NA	-	.	NA	NA	NA	NA	NA	NA	NA	NA	NA
LNCV6_137662_PI430048170	0.0035159	0.424366	5.10712	5.12618	4.80376	P	P	P	6.45965	6.30422	5.96108	P	P	P	LNCV6_137662_PI430048170	mRNA	GCATTGCCCTTCATCACAGAAGTATTCAACTCTGACAAATAAATATGTCATCCTGAATTA	NM_017734	RefSeq	chr1	+	99645874	99694541	PALMD	54873	palmdelphin	GO:0005737|GO:0043197|GO:0016020|GO:0008360	.	NA	-	.	NA	NA	NA	NA	NA	NA	NA	NA	NA
LNCV6_138865_PI430048170	0.000968441	0.0850218	6.65788	6.39093	6.22967	P	P	P	10.0312	9.9687	9.97864	P	P	P	LNCV6_138865_PI430048170	mRNA	GTTCTCTTCTTTTGGGGAGAACGTAGAGTCTCACTCTAGATGTTTTATGTATTATATCTA	NM_004364	RefSeq	chr19	-	33299933	33302564	CEBPA	1050	CCAAT/enhancer binding protein (C/EBP), alpha, transcript variant 1	GO:0005515|GO:0003700|GO:0008285|GO:0044212|GO:0006366|GO:0030324|GO:0003705|GO:0031100|GO:0019221|GO:0005634|GO:0006091|GO:0032403|GO:0042803|GO:0016363|GO:0045944|GO:0045945|GO:0035189|GO:0016032|GO:0030099|GO:0030225|GO:0048469|GO:0008203|GO:0071285|GO	.	NA	-	.	NA	NA	NA	NA	NA	NA	NA	NA	NA
LNCV6_129593_PI430048170	0.000390649	0.330382	2.91767	3.08994	3.27161	P	P	P	4.72508	4.80218	4.55619	P	P	P	LNCV6_129593_PI430048170	mRNA	GTGTCTGCTGCGATAAAATGAGGTTGTCTGTAGTATTTAAGGAGAAAAGAGATAAGTTTT	NM_001271948	RefSeq	chr5	-	146589504	146878785	PPP2R2B	5521	protein phosphatase 2, regulatory subunit B, beta, transcript variant 10	GO:0005739|GO:0005515|GO:0007165|GO:0050790|GO:0008601|GO:0006915|GO:0000159|GO:0005741|GO:0005856	.	NA	-	.	NA	NA	NA	NA	NA	NA	NA	NA	NA
LNCV6_131225_PI430048170	0.0249926	2.00609	9.64868	9.51226	9.04115	P	P	P	8.41893	8.51379	8.31732	P	P	P	LNCV6_131225_PI430048170	mRNA	CTCTGCACTATGAACCCAAACCCAGCTCAAAAAGATAAAATCTAGTCATTTAAGATAATC	NM_025218	RefSeq	chr6	+	149964006	149973711	ULBP1	80329	UL16 binding protein 1	GO:0002474|GO:0030101|GO:0005886|GO:0005783|GO:0046703|GO:0042267|GO:0050776|GO:0042605|GO:0046658	.	NA	-	.	NA	NA	NA	NA	NA	NA	NA	NA	NA
LNCV6_136957_PI430048170	0.00121188	2.09704	6.53047	6.57205	6.28027	P	P	P	5.45431	5.51374	5.20884	P	P	P	LNCV6_136957_PI430048170	mRNA	AGTAACAAAGAGCACCAAGTTTTAATTTAAATAGGAGATTTAACACTAGGGATCAGGGAG	NM_004272	RefSeq	chr5	-	79373823	79513836	HOMER1	9456	homer scaffolding protein 1, transcript variant 1	GO:0030424|GO:0030018|GO:0030054|GO:0051928|GO:0035418|GO:0007268|GO:0048148|GO:2001257|GO:2001256|GO:0007206|GO:0042802|GO:0043198|GO:0045211|GO:0097110|GO:0043025|GO:0035591|GO:0048875|GO:0046982|GO:0090279|GO:0045177|GO:0048741|GO:0009967|GO:0060076|GO	.	NA	-	.	NA	NA	NA	NA	NA	NA	NA	NA	NA
LNCV6_141019_PI430048170	0.00289871	0.290479	1.40196	1.33143	0.812341	A	A	A	3.18831	2.89856	2.85476	P	P	P	LNCV6_141019_PI430048170	mRNA	GATGACTAATATCGTCCCATTTTGGAAATAAAGCAACAGACTTCTCAACAATCAATGAGT	NM_001081450	RefSeq	chr19_KI270938v1_alt	-	191260	217825	LILRB3	11025	leukocyte immunoglobulin-like receptor, subfamily B (with TM and ITIM domains), member 3, transcript variant 1	GO:0005515|GO:0005887|GO:0045671|GO:0006952|GO:0004872|GO:0007166|GO:0004888|GO:0002376	.	NA	-	.	NA	NA	NA	NA	NA	NA	NA	NA	NA
LNCV6_135689_PI430048170	0.00146087	0.408607	11.6315	11.6444	11.3472	P	P	P	12.8723	12.8954	12.7436	P	P	P	LNCV6_135689_PI430048170	mRNA	ACTGTTATGTTTTATCTGCCCATTTATCTTTCTTAGTTACCAGGAGAAATGTGTGACACC	NM_017549	RefSeq	chr7	+	37920560	37951940	EPDR1	54749	ependymin related 1, transcript variant 1	GO:0007160|GO:0005509|GO:0005764|GO:0070062	.	NA	-	.	NA	NA	NA	NA	NA	NA	NA	NA	NA
LNCV6_130546_PI430048170	3.0251e-05	0.0245933	0.303331	0.282643	0.401706	A	A	A	5.58824	5.84269	5.58065	P	P	P	LNCV6_130546_PI430048170	mRNA	TGGGGCCATGATTGGTTTCTAGGCAGTTCAAAGCAGGATATGTTAAGTAACACTCACCAT	NM_000730	RefSeq	chr4	-	26481395	26490420	CCKAR	886	cholecystokinin A receptor	GO:0007631|GO:0042277|GO:0005886|GO:0007584|GO:0007586|GO:0046883|GO:0007200|GO:0007409|GO:0007204|GO:0032870|GO:0005887|GO:0004951|GO:0030900|GO:0001764	.	NA	-	.	NA	NA	NA	NA	NA	NA	NA	NA	NA
LNCV6_138963_PI430048170	7.1314e-06	0.213414	6.33599	6.24689	6.15835	P	P	P	8.55427	8.49629	8.37522	P	P	P	LNCV6_138963_PI430048170	mRNA	GACATGATATAGTCAGCTGCCTTTTAAGAGGTCTTATCTGTTCAGTGTTAAGTGATTTAA	NM_001759	RefSeq	chr12	+	4273735	4305356	CCND2	894	cyclin D2	GO:0005515|GO:0031965|GO:0019901|GO:0005730|GO:0045737|GO:0005634|GO:0005829|GO:0007049|GO:0000307|GO:0001934|GO:0005654|GO:0000785|GO:0051301	.	NA	-	.	NA	NA	NA	NA	NA	NA	NA	NA	NA
LNCV6_61456_PI430048170	0.000321774	0.0880653	10.1251	9.93908	9.75183	P	P	P	13.4952	13.3805	13.4776	P	P	P	LNCV6_61456_PI430048170	mRNA	ACACTTTCAAGTAAACCAGGTGGTGGAGACCCCATCCTTGGCTGCTTGCAGGGCCACTGT	NM_001311	RefSeq	chr14	+	105486919	105488787	CRIP1	1396	cysteine-rich protein 1 (intestinal)	GO:0010468|GO:0042277|GO:0010033|GO:0008630|GO:0008283|GO:0008301|GO:0060741|GO:0071493|GO:0010043|GO:0007507|GO:0005737|GO:0006955|GO:0003680|GO:0008270|GO:0071236	.	NA	-	.	NA	NA	NA	NA	NA	NA	NA	NA	NA
LNCV6_132739_PI430048170	1.47499e-05	11.0411	9.08263	8.98509	8.77133	P	P	P	5.47842	5.60499	5.36883	P	P	P	LNCV6_132739_PI430048170	mRNA	CTTCTCTTTCAGACTTGAATCTGTAGACATTTCTTTATTGATATGGCAAATTGCTTGCAG	NM_014788	RefSeq	chr9	-	98084352	98119353	TRIM14	9830	tripartite motif containing 14, transcript variant 1	GO:0005622|GO:0003674|GO:0051091|GO:0005737|GO:0051092|GO:0045087|GO:0032897|GO:0008270	.	NA	-	.	NA	NA	NA	NA	NA	NA	NA	NA	NA
LNCV6_145501_PI430048170	0.00856703	0.463438	1.72939	2.19286	2.23567	A	A	A	2.83426	3.32337	3.32792	P	P	P	LNCV6_145501_PI430048170	mRNA	AAGCTGGCCATTAACATGAACTACGTCACTTTTCTTTTGAGGGTCAAATATTTAGTGCAT	NM_031275	RefSeq	chr11	+	112167371	112172556	TEX12	56158	testis expressed 12	GO:0000711|GO:0000801|GO:0007130	.	NA	-	.	NA	NA	NA	NA	NA	NA	NA	NA	NA
LNCV6_144233_PI430048170	9.60092e-07	83.068	14.1266	14.0432	13.9161	P	P	P	7.80533	7.5286	7.61704	P	P	P	LNCV6_144233_PI430048170	mRNA	GCTTCTCTCAGTCACTGCTGGCGCTTTCTTAATCTTTATCCAATAAAATGAAACAAAAAA	NM_022055	RefSeq	chr2	-	47520775	47570331	KCNK12	56660	potassium channel, two pore domain subfamily K, member 12	GO:0005244|GO:0005267|GO:0034765|GO:0016021|GO:0071805	.	NA	-	.	NA	NA	NA	NA	NA	NA	NA	NA	NA
LNCV6_131774_PI430048170	0.000944016	2.12888	8.07012	7.83272	7.79755	P	P	P	6.85432	6.70267	6.88223	P	P	P	LNCV6_131774_PI430048170	mRNA	CCAGGCTATTCACACAGGCCACAGCAGAAAAGAGAGCACCTGTGAAGAAATAAATACCAT	NM_015077	RefSeq	chr17	+	28371661	28401038	SARM1	23098	sterile alpha and TIR motif containing 1	GO:0030424|GO:0030054|GO:0034142|GO:0005874|GO:0045202|GO:0042981|GO:0002224|GO:0030425|GO:0005829|GO:0009749|GO:0048814|GO:0005739|GO:0002756|GO:0005737|GO:0031315|GO:0045087|GO:0034138	.	NA	-	.	NA	NA	NA	NA	NA	NA	NA	NA	NA
LNCV6_130006_PI430048170	0.000127119	17.7196	4.89981	4.19146	4.45039	P	P	P	0.23806	0.144988	0.735115	A	A	A	LNCV6_130006_PI430048170	mRNA	CAGTGATCTCCTTTAGCAGAGCCCTTTTAGGATTAGCCTGGCTAAGAAAGGAAGAAAAAA	NM_001291702	RefSeq	chr6	-	132722786	132734765	VNN3	55350	vanin 3, transcript variant 4	GO:0017159|GO:0008150|GO:0006807|GO:0005886|GO:0031225|GO:0005575	.	NA	-	.	NA	NA	NA	NA	NA	NA	NA	NA	NA
LNCV6_141187_PI430048170	0.00521935	0.499306	6.43828	6.16251	5.97028	P	P	P	7.30509	7.28441	7.0075	P	P	P	LNCV6_141187_PI430048170	mRNA	TGTTCAGGGCTGTGATCGGCCTGGGGAAATAATAAAGATGTTCTTTTAAACGGTAAAAAA	NM_021006	RefSeq	chr17_KI270909v1_alt	-	250577	252466	CCL3L1	NA	chemokine (C-C motif) ligand 3-like 1, transcript variant 1	NA	.	NA	-	.	NA	NA	NA	NA	NA	NA	NA	NA	NA
LNCV6_134581_PI430048170	0.00075428	6.64312	10.3491	10.0661	9.94121	P	P	P	7.35435	7.47777	7.35598	P	P	P	LNCV6_134581_PI430048170	mRNA	CCCCACTTTTTGTTGCTTTCTAGACTTGTGTGTAGAAAGAAGATTAATGATCACTTAAAG	NM_203371	RefSeq	chr11	+	26994080	26997085	FIBIN	387758	fin bud initiation factor homolog (zebrafish)	GO:0005794|GO:0005783|GO:0005576	.	NA	-	.	NA	NA	NA	NA	NA	NA	NA	NA	NA
LNCV6_135193_PI430048170	4.62332e-05	5.80656	9.29649	9.01941	9.00859	P	P	P	6.76059	6.49247	6.45782	P	P	P	LNCV6_135193_PI430048170	mRNA	ATGGCACTTTGGTGGGGTTGGAAACAAAGTCGACATTAAAGGTCATTTCTCCTGAAAAAA	NM_000679	RefSeq	chr5	+	159916732	159973010	ADRA1B	147	adrenoceptor alpha 1B	GO:0005886|GO:0008283|GO:0007267|GO:0048148|GO:0005634|GO:0007512|GO:0019229|GO:0035556|GO:0001987|GO:0035265|GO:0007626|GO:0004937|GO:0031965|GO:0046982|GO:0007275|GO:0043278|GO:0042593|GO:0001996|GO:0045818|GO:0001975|GO:0045819|GO:0007186|GO:0005887|GO	.	NA	-	.	NA	NA	NA	NA	NA	NA	NA	NA	NA
LNCV6_137931_PI430048170	0.000195027	0.454207	5.32415	5.52966	5.44198	P	P	P	6.54349	6.65434	6.51734	P	P	P	LNCV6_137931_PI430048170	mRNA	CGTGTGGATGTCGGTAACAGTTGTATAAAATAAATTCTATTTATCGCTATTGTACCCAGA	NM_001145657	RefSeq	chr1	-	21596214	21669363	RAP1GAP	5909	RAP1 GTPase activating protein, transcript variant 2	GO:0005515|GO:0003924|GO:0032854|GO:0042803|GO:0005829|GO:0007165|GO:0046582|GO:0000139|GO:0016020|GO:0008152|GO:0017016|GO:0005096|GO:0032318	.	NA	-	.	NA	NA	NA	NA	NA	NA	NA	NA	NA
LNCV6_137490_PI430048170	0.00364757	127.196	8.08744	7.85995	7.8037	P	P	P	1.72435	0.337359	0.206283	A	A	A	LNCV6_137490_PI430048170	mRNA	CAGGCTATTCTACTTTAAAGGAAGCCTTTTTATTTTGCTGCACACAATCTAGCAGGAATC	NM_002543	RefSeq	chr12	-	10158299	10172191	OLR1	4973	oxidized low density lipoprotein (lectin-like) receptor 1, transcript variant 1	GO:0005515|GO:0042542|GO:0008219|GO:0005886|GO:0008015|GO:0050900|GO:0006898|GO:0043231|GO:0043235|GO:0005041|GO:0006954|GO:0016020|GO:0005887|GO:0007596|GO:0042157|GO:0006508|GO:0007159|GO:0030246|GO:0045121|GO:0005654|GO:0070062	.	NA	-	.	NA	NA	NA	NA	NA	NA	NA	NA	NA
LNCV6_139392_PI430048170	3.0554e-05	0.138311	10.6528	10.5607	10.5389	P	P	P	13.5509	13.4299	13.3273	P	P	P	LNCV6_139392_PI430048170	mRNA	CTGGCCCTCTAGCTTCTACCCTTTGTCCCTGTAGCCTATACAGTTTAGAATATTTATTTG	NM_001878	RefSeq	chr1	-	156699607	156705667	CRABP2	1382	cellular retinoic acid binding protein 2, transcript variant 1	GO:0005215|GO:0006355|GO:0005783|GO:0016918|GO:0055085|GO:0019841|GO:0005829|GO:0007165|GO:0005737|GO:0008544|GO:0042573|GO:0001972|GO:0005501|GO:0005654|GO:0035115|GO:0070062	.	NA	-	.	NA	NA	NA	NA	NA	NA	NA	NA	NA
LNCV6_141726_PI430048170	5.2656e-05	0.303869	4.3302	4.50176	4.27999	P	P	P	6.08747	6.20397	5.97645	P	P	P	LNCV6_141726_PI430048170	mRNA	CTGGTTCCATCTCTGCTATATGGGAATGAAAATAAAGAAACATATTTCTTGGCTTGTCTA	NM_001168531	RefSeq	chrX	-	15243986	15270467	ASB9	140462	ankyrin repeat and SOCS box containing 9, transcript variant 4	GO:0035556|GO:0005739|GO:0005515|GO:0045732|GO:0016567	.	NA	-	.	NA	NA	NA	NA	NA	NA	NA	NA	NA
LNCV6_128178_PI430048170	0.000142371	0.496684	5.14913	5.12041	5.28844	P	P	P	6.27167	6.12007	6.19672	P	P	P	LNCV6_128178_PI430048170	mRNA	GCGGAGCTTCCCTGTGGCATGAACCCCACGGGGTATTAAATTATGAATCAGCTGAAAAAA	NM_001011880	RefSeq	chr16	-	74408630	74421470	CLEC18B	497190	C-type lectin domain family 18, member B	GO:0030246|GO:0005576	.	NA	-	.	NA	NA	NA	NA	NA	NA	NA	NA	NA
LNCV6_128319_PI430048170	0.00271515	0.0334116	4.99699	5.07712	4.19632	P	P	P	9.76787	9.73184	9.63056	P	P	P	LNCV6_128319_PI430048170	mRNA	GCAAATCTCACTGGATATTTTTAAAGGTCTCCACAGAGTTTATGCCATATTGGAATTTTG	NM_000204	RefSeq	chr4	-	109740691	109802179	CFI	3426	complement factor I	GO:0030449|GO:0004252|GO:0005576|GO:0005634|GO:0005615|GO:0006898|GO:0046872|GO:0016020|GO:0045087|GO:0006958|GO:0006508|GO:0005044|GO:0070062	.	NA	-	.	NA	NA	NA	NA	NA	NA	NA	NA	NA
LNCV6_138150_PI430048170	0.00025565	374.854	11.962	12.1135	11.8559	P	P	P	3.51273	3.72652	2.94508	P	P	P	LNCV6_138150_PI430048170	mRNA	GTGCTAGTAGAATATAAGATAAAAGAGGCTGAGAATTACCATACAAGGGTATTACAACTG	NM_033439	RefSeq	chr9	+	6215785	6257983	IL33	90865	interleukin 33, transcript variant 1	GO:0032755|GO:0005515|GO:0030133|GO:0032753|GO:0032754|GO:0043032|GO:0005694|GO:0032436|GO:0005634|GO:0032736|GO:0097191|GO:0005125|GO:0005615|GO:0006351|GO:0042092|GO:0051025|GO:0045944|GO:0002686|GO:0051024|GO:0050729|GO:0002826|GO:0002830|GO:0032689|GO	.	NA	-	.	NA	NA	NA	NA	NA	NA	NA	NA	NA
LNCV6_60093_PI430048170	0.00992428	0.473112	4.65816	4.82964	5.23999	P	P	P	5.83143	6.18075	5.99698	P	P	P	LNCV6_60093_PI430048170	mRNA	CTCCAGCTGATGCAATCTAAATACAAGCAAAAGCTAAAAAGAGAAGAATCTGTAAGAATC	NM_001002264	RefSeq	chr13	-	42886387	42992271	EPSTI1	94240	epithelial stromal interaction 1 (breast), transcript variant 1	NA	.	NA	-	.	NA	NA	NA	NA	NA	NA	NA	NA	NA
LNCV6_129746_PI430048170	0.00014538	0.0224214	0.0978772	0.0997499	0.109691	A	A	A	5.65409	5.63703	5.44387	P	P	P	LNCV6_129746_PI430048170	mRNA	ATTGTAAGATATTTTAACCCTGTATAAATGCAACTTTTCCTTTAGCTTAATGGCCTGGGG	NM_021926	RefSeq	chr11	-	44260727	44310166	ALX4	60529	ALX homeobox 4	GO:0005667|GO:0003700|GO:0046982|GO:0048704|GO:0048565|GO:0042981|GO:0005634|GO:0009791|GO:0009952|GO:0003677|GO:0006351|GO:0043565|GO:0001501|GO:0007517|GO:0045944|GO:0035116|GO:0071837|GO:0060021|GO:0035115|GO:0001942|GO:0042733	.	NA	-	.	NA	NA	NA	NA	NA	NA	NA	NA	NA
LNCV6_129927_PI430048170	3.04961e-06	0.220607	7.09501	7.05543	7.08548	P	P	P	9.21452	9.2741	9.28789	P	P	P	LNCV6_129927_PI430048170	mRNA	GGGATGGAGTTAGAACCTTAATGATAATTTCTTTCGTTTGGTGTAGGTTTTAGAGATTTG	NM_012244	RefSeq	chr14	-	23125294	23183660	SLC7A8	23428	solute carrier family 7 (amino acid transporter light chain, L system), member 8, transcript variant 1	GO:0005515|GO:0019534|GO:0006520|GO:0015695|GO:0005886|GO:0006865|GO:0009636|GO:0050900|GO:0055085|GO:0015101|GO:0055065|GO:0016323|GO:0015804|GO:0005737|GO:0015171|GO:0005887|GO:0007596|GO:0042605|GO:0006810|GO:0015175|GO:0015179|GO:0070062|GO:0006811	.	NA	-	.	NA	NA	NA	NA	NA	NA	NA	NA	NA
LNCV6_143159_PI430048170	0.0136677	2.04579	8.66844	8.66207	8.44437	P	P	P	7.72213	7.70218	7.20714	P	P	P	LNCV6_143159_PI430048170	mRNA	TTCGGAAAATGCTCCTTGTCACATTAGTGTGCATCCTACAAAAAGTGATCTCTTAATGTA	NM_021127	RefSeq	chr18	+	59899959	59904306	PMAIP1	5366	phorbol-12-myristate-13-acetate-induced protein 1	GO:0005515|GO:0043331|GO:0010165|GO:0048147|GO:0005741|GO:0005634|GO:0001836|GO:0010907|GO:0005829|GO:0005739|GO:0051607|GO:1900740|GO:0043525|GO:0090200|GO:0042149|GO:0032461|GO:0043029|GO:0009411|GO:0046902|GO:0043065|GO:0006919|GO:0072593|GO:0071456|GO	.	NA	-	.	NA	NA	NA	NA	NA	NA	NA	NA	NA
LNCV6_139972_PI430048170	0.0111648	2.04409	8.98676	8.7765	8.55654	P	P	P	7.7848	7.69378	7.77709	P	P	P	LNCV6_139972_PI430048170	mRNA	TTGGGCTCAGTTCCCTGGGTCATCAGCCATCAAATCTTGTTGAGTTTAAAAAATAAACAG	NM_014580	RefSeq	chr9	+	127397137	127407891	SLC2A8	29988	solute carrier family 2 (facilitated glucose transporter), member 8, transcript variant 1	GO:0008286|GO:0001666|GO:0005886|GO:0005975|GO:0005765|GO:0055085|GO:0005536|GO:0008021|GO:0015758|GO:0005887|GO:0005355|GO:0007141|GO:0030659	.	NA	-	.	NA	NA	NA	NA	NA	NA	NA	NA	NA
LNCV6_131111_PI430048170	0.00191299	2.66352	6.04583	6.1368	5.67292	P	P	P	4.69523	4.64645	4.27985	P	P	P	LNCV6_131111_PI430048170	mRNA	GCACAGGGTTCCCTTATGTAGATGTACACATGGCATTGCATATAGAGATTAAATTATTAT	NM_001039762	RefSeq	chr10	-	127135425	127196158	FAM196A	642938	family with sequence similarity 196, member A	NA	.	NA	-	.	NA	NA	NA	NA	NA	NA	NA	NA	NA
LNCV6_117474_PI430048170	0.00223885	0.086421	5.96193	5.756	5.3743	P	P	P	9.23945	9.27457	9.23552	P	P	P	LNCV6_117474_PI430048170	mRNA	CCAAAGAGAAACGAGCAGTAAACAGTCTCAGCATGGAAAATGCCAACCAAGAAAATGAAG	NM_018476	RefSeq	chrX	-	103062652	103064240	BEX1	55859	brain expressed, X-linked 1	GO:0005667|GO:0001102|GO:0051091|GO:0005737|GO:0045944|GO:0005634|GO:0030154|GO:0007399	.	NA	-	.	NA	NA	NA	NA	NA	NA	NA	NA	NA
LNCV6_140502_PI430048170	0.00923223	0.118801	0.279564	1.14524	1.37648	A	A	A	4.16865	3.9577	4.10164	P	P	P	LNCV6_140502_PI430048170	mRNA	GATGCGCTGATAGAACATCCTCAAGACAGTTTCCTTGAAATCAATAAATACTGTGTTTTA	NM_024009	RefSeq	chr1	+	34781188	34786364	GJB3	2707	gap junction protein, beta 3, 31kDa, transcript variant 1	GO:0005737|GO:0005243|GO:0007154|GO:0007605|GO:0005921|GO:0043588|GO:0005922|GO:0016021|GO:0001890|GO:0055085|GO:0001701	.	NA	-	.	NA	NA	NA	NA	NA	NA	NA	NA	NA
LNCV6_142076_PI430048170	5.00728e-05	3.46671	8.57943	8.54433	8.44333	P	P	P	6.84631	6.69166	6.64402	P	P	P	LNCV6_142076_PI430048170	mRNA	CTGCCCAAGATATGTATTCTCTGACACTCTTATTTGGTCATAAAACAATAAATGGTGTCA	NM_002561	RefSeq	chr17	-	3673227	3696404	P2RX5	5026	purinergic receptor P2X, ligand gated ion channel, 5, transcript variant 1	GO:0035590|GO:0004931|GO:0010524|GO:0005524|GO:0050850|GO:0005639|GO:0007399|GO:0007165|GO:0034220|GO:0005887|GO:0006810|GO:0001614|GO:0005216|GO:0006812|GO:0004888	.	NA	-	.	NA	NA	NA	NA	NA	NA	NA	NA	NA
LNCV6_86077_PI430048170	1.96679e-05	0.139117	5.79824	6.0443	5.7849	P	P	P	8.80523	8.81145	8.54728	P	P	P	LNCV6_86077_PI430048170	mRNA	GCCACTCTTGAATACCATTCTCCACTATTAACATTAATTTACTCAAACCGTTCATAGCAT	NM_020156	RefSeq	chr7	+	7182614	7248649	C1GALT1	56913	core 1 synthase, glycoprotein-N-acetylgalactosamine 3-beta-galactosyltransferase 1	GO:0060576|GO:0005515|GO:0006493|GO:0000139|GO:0001822|GO:0016266|GO:0016263|GO:0016021|GO:0001525|GO:0044267|GO:0046872|GO:0043687	.	NA	-	.	NA	NA	NA	NA	NA	NA	NA	NA	NA
LNCV6_143872_PI430048170	3.68723e-06	0.39384	7.5788	7.51213	7.58935	P	P	P	8.8873	8.95757	8.86802	P	P	P	LNCV6_143872_PI430048170	mRNA	GTTCAGTAACCCTATGTGAATCAGATGTCTCCTGGATAACATTAAAGCCATGTCTTTGTC	NM_152331	RefSeq	chr14	+	73591705	73595766	ACOT4	122970	acyl-CoA thioesterase 4	GO:0052689|GO:0000038|GO:0004778|GO:0006637|GO:0001676|GO:0046459|GO:0043648|GO:0016290|GO:0043649|GO:0005102|GO:0047617|GO:0032789|GO:0032788|GO:0006104|GO:0019605|GO:0005777	.	NA	-	.	NA	NA	NA	NA	NA	NA	NA	NA	NA
LNCV6_140557_PI430048170	0.000618385	2.27429	7.54967	7.39809	7.26886	P	P	P	6.32651	6.16898	6.17294	P	P	P	LNCV6_140557_PI430048170	mRNA	ATGTGTCAGAGCCATTTGGTCCATCATCTCCTGCAATAAACCCATCGCAAGAATGACCTT	NM_001279	RefSeq	chr18	+	12254318	12277595	CIDEA	1149	cell death-inducing DFFA-like effector a, transcript variant 1	GO:0005811|GO:0006629|GO:0008219|GO:0035634|GO:0006355|GO:0050995|GO:0001659|GO:0019915|GO:0032720|GO:0006915|GO:0042981|GO:0005634|GO:0005740|GO:0050710|GO:0042803|GO:0006351|GO:0005739|GO:0005737|GO:0010890|GO:1900118|GO:0030512	.	NA	-	.	NA	NA	NA	NA	NA	NA	NA	NA	NA
LNCV6_133363_PI430048170	2.81739e-05	6.32399	15.2501	15.3099	15.1475	P	P	P	12.5915	12.6044	12.5327	P	P	P	LNCV6_133363_PI430048170	mRNA	GCTCCTTCAGACACGTGCTTGATGCTGAGCAAGTTCAATAAAGATTCTTGGAAGTTTTGA	NM_019554	RefSeq	chr1	-	153543618	153545806	S100A4	6275	S100 calcium binding protein A4, transcript variant 2	GO:0005515|GO:0043005|GO:0048471|GO:0005509|GO:0003779|GO:0005634|GO:0001837|GO:0005615|GO:0042802|GO:0050786|GO:0043123|GO:0048306|GO:0070062	.	NA	-	.	NA	NA	NA	NA	NA	NA	NA	NA	NA
LNCV6_140307_PI430048170	0.0406691	0.203618	0.78736	2.24659	2.4173	A	P	A	4.22949	4.36469	4.22158	P	P	P	LNCV6_140307_PI430048170	mRNA	ACTTGAGCTTAAACTGACAACCTGGATGTAAATAGGAGCCTTTCTACTGGTTTATTTAAT	NM_024923	RefSeq	chr3	-	13316229	13420319	NUP210	23225	nucleoporin 210kDa	GO:0007077|GO:0010467|GO:0031965|GO:0005975|GO:0019083|GO:0019221|GO:0019058|GO:0044281|GO:0005635|GO:0015031|GO:0055085|GO:0010827|GO:0008645|GO:0015758|GO:0016020|GO:0005643|GO:0046983|GO:0005789|GO:0009405|GO:0016032|GO:0051028|GO:0000278	.	NA	-	.	NA	NA	NA	NA	NA	NA	NA	NA	NA
LNCV6_142558_PI430048170	0.000593776	7.75948	3.16797	3.05047	3.3751	P	P	P	0.253822	0.283392	0.206283	A	A	A	LNCV6_142558_PI430048170	mRNA	CAGCTTAACAAACATATTAGACAGACAAAGGTCTCAAATTAAAGGGAAAGATTCAGAGGG	NM_020741	RefSeq	chr3	-	128970938	128994143	KIAA1257	57501	KIAA1257	NA	.	NA	-	.	NA	NA	NA	NA	NA	NA	NA	NA	NA
LNCV6_135811_PI430048170	0.0118904	0.3451	3.45173	4.09941	4.17623	P	P	P	5.55415	5.29084	5.57381	P	P	P	LNCV6_135811_PI430048170	mRNA	AAATAAGGAGCCAGAGGAGTTACCTGTGTCCTGCATTATGATTAAAGCCTTTTAAAGTTG	NM_145038	RefSeq	chr2	+	26401915	26456711	DRC1	92749	dynein regulatory complex subunit 1	GO:0071973|GO:0060285|GO:0005930|GO:0070286|GO:0005856	.	NA	-	.	NA	NA	NA	NA	NA	NA	NA	NA	NA
LNCV6_50120_PI430048170	4.61003e-06	0.0806458	0.210632	0.125488	0.0832303	A	A	A	3.6826	3.74771	3.88155	P	P	P	LNCV6_50120_PI430048170	mRNA	ACTGTGTGTCTCATGGTATGTAACTCTTAAAGCAAATAAATGAACTGACTTCAACTGGGA	NM_000566	RefSeq	chr1	+	149782693	149792518	FCGR1A	NA	Fc fragment of IgG, high affinity Ia, receptor (CD64)	NA	.	NA	-	.	NA	NA	NA	NA	NA	NA	NA	NA	NA
LNCV6_142362_PI430048170	0.002765	0.385005	6.32759	6.41587	5.96325	P	P	P	7.66883	7.84087	7.31894	P	P	P	LNCV6_142362_PI430048170	mRNA	GCTGCTAGACTGGTTTTCTGTGTTGGTAAATTGCCTATATAAATCTGAATAAAAAGGATC	NM_005160	RefSeq	chr22	+	25564893	25729291	ADRBK2	157	adrenergic, beta, receptor kinase 2	GO:0031623|GO:0007165|GO:0004703|GO:0004672|GO:0047696|GO:0038032|GO:0006468|GO:0005524	.	NA	-	.	NA	NA	NA	NA	NA	NA	NA	NA	NA
LNCV6_130578_PI430048170	0.0351528	0.422074	6.30193	7.13834	7.15717	P	P	P	8.26515	8.21957	7.98385	P	P	P	LNCV6_130578_PI430048170	mRNA	CTCTGTCTCTTCCTTTTCACATTTGTGCACATAAAATATACTGGTGTTTGTGTTCCAGGA	NM_182526	RefSeq	chr14	-	67470265	67515304	TMEM229B	161145	transmembrane protein 229B	GO:0016021	.	NA	-	.	NA	NA	NA	NA	NA	NA	NA	NA	NA
LNCV6_141929_PI430048170	0.000140916	0.401305	8.81247	8.68295	8.58703	P	P	P	9.98317	9.94593	10.1088	P	P	P	LNCV6_141929_PI430048170	mRNA	TTCAAAAAATCCGCTAGACATGTCATAAGTTTTAACTGTAATGCCCAGGAAAGGATATCT	NM_001278074	RefSeq	chr9	+	134641804	134844842	COL5A1	1289	collagen, type V, alpha 1, transcript variant 2	GO:0035313|GO:0048592|GO:0005588|GO:0035989|GO:0046872|GO:0022617|GO:0007411|GO:0030198|GO:0030199|GO:0030574|GO:0045112|GO:0043206|GO:0007155|GO:0008201|GO:0070062|GO:0001568|GO:0048407|GO:0043394|GO:0005576|GO:0005604|GO:0031012|GO:0003007|GO:0005178|GO	.	NA	-	.	NA	NA	NA	NA	NA	NA	NA	NA	NA
LNCV6_67437_PI430048170	0.00566282	29.8367	6.39998	6.39941	6.52638	P	P	P	1.42778	0.7638	2.12457	A	A	A	LNCV6_67437_PI430048170	mRNA	CTGCCAGGGCTGCAAAACAGCTCGAATATCAGCAATTAGAAGACGATAAACTTTCTCAGA	NM_012307	RefSeq	chr18	-	5392380	5544310	EPB41L3	23136	erythrocyte membrane protein band 4.1-like 3, transcript variant 1	GO:0005515|GO:0002175|GO:0030913|GO:0005886|GO:0044224|GO:0008360|GO:0033270|GO:0006915|GO:0003779|GO:0072659|GO:0008150|GO:0005737|GO:0030865|GO:0030866|GO:0005911|GO:0048812|GO:0005200|GO:0043217|GO:0071205|GO:0030673|GO:0005856|GO:0007016|GO:0019898	.	NA	-	.	NA	NA	NA	NA	NA	NA	NA	NA	NA
LNCV6_132379_PI430048170	0.000543516	2.8734	5.66097	5.29135	5.4954	P	P	P	3.94088	4.15314	3.78528	P	P	P	LNCV6_132379_PI430048170	mRNA	CCAAAGGTTCCGTTGCAGCTTTTTACAACCATCCGGTGTGGTTTGGAGGATTTGTTTTTT	NM_002523	RefSeq	chr7	+	98617284	98629869	NPTX2	4885	neuronal pentraxin II	GO:0003674|GO:0030246|GO:0007268|GO:0005576|GO:0005575|GO:0046872	.	NA	-	.	NA	NA	NA	NA	NA	NA	NA	NA	NA
LNCV6_93836_PI430048170	0.000497207	0.36081	7.60108	7.52253	7.50082	P	P	P	8.96315	8.92015	9.14511	P	P	P	LNCV6_93836_PI430048170	mRNA	TTGGGCTGCCTGACCTCCTTGGGTGCTTGCTATTAATTAACAGACTTTGTGGGGAAAAAA	NM_004307	RefSeq	chr4	-	40810026	41214618	APBB2	323	amyloid beta (A4) precursor protein-binding, family B, member 2, transcript variant 1	GO:0005515|GO:0043066|GO:0006355|GO:0030308|GO:0043065|GO:0045202|GO:0005634|GO:0030027|GO:0030426|GO:0035556|GO:0005737|GO:0001540|GO:0016020|GO:0007411|GO:0030198|GO:0007050|GO:0001764|GO:0008134	.	NA	-	.	NA	NA	NA	NA	NA	NA	NA	NA	NA
LNCV6_116644_PI430048170	0.00125836	0.484146	10.4868	10.3328	10.323	P	P	P	11.339	11.3359	11.5972	P	P	P	LNCV6_116644_PI430048170	mRNA	TTGCTGGAATTGTTGTGGATAAGCCACCTTCTACTATGCAATTTGAAGATGATGATCATG	NM_016824	RefSeq	chr10	+	110007952	110135565	ADD3	120	adducin 3 (gamma), transcript variant 1	GO:0005516|GO:0005737|GO:0000794|GO:0016020|GO:0005886|GO:0005911|GO:0005200|GO:0005654|GO:0003779|GO:0005856|GO:0005938	.	NA	-	.	NA	NA	NA	NA	NA	NA	NA	NA	NA
LNCV6_139499_PI430048170	0.000386568	0.313466	4.66882	4.84393	4.54671	P	P	P	6.45514	6.30694	6.32931	P	P	P	LNCV6_139499_PI430048170	mRNA	GACAGCAACCTCCTGGGTAAATCTGAATGAAAAACGTGCTAGTCTCTTTCATGCAAAAAA	NM_004933	RefSeq	chr16	+	89171754	89195492	CDH15	1013	cadherin 15, type 1, M-cadherin (myotubule)	GO:0031594|GO:0005886|GO:0034329|GO:0005509|GO:0045216|GO:0042692|GO:0051149|GO:0005901|GO:0016021|GO:0007155|GO:0007156|GO:0034332|GO:0070062	.	NA	-	.	NA	NA	NA	NA	NA	NA	NA	NA	NA
LNCV6_143377_PI430048170	0.0185771	0.238949	4.33709	5.4472	5.10227	P	P	P	7.24337	7.04453	6.99314	P	P	P	LNCV6_143377_PI430048170	mRNA	GTGTTGGTGGTATTTTATTGTTGTTTTTCTGTGTTTATGTGTCTCAGCTTTCTCCAAGGA	NM_001282400	RefSeq	chrX	-	101882287	101932066	ZMAT1	84460	zinc finger, matrin-type 1, transcript variant 2	GO:0008270|GO:0005634|GO:0003677	.	NA	-	.	NA	NA	NA	NA	NA	NA	NA	NA	NA
LNCV6_145610_PI430048170	0.000175262	3.84102	8.68097	8.52993	8.32351	P	P	P	6.55201	6.40817	6.75125	P	P	P	LNCV6_145610_PI430048170	mRNA	CCAGATGTGAAAGAAGCTGCCTGTTTACTGATCCATTGAATAAACCCATTTTAATAGAAA	NM_000740	RefSeq	chr1	+	239629072	239909417	CHRM3	1131	cholinergic receptor, muscarinic 3	GO:0005515|GO:0030054|GO:0005886|GO:0008283|GO:0044281|GO:0030425|GO:0032279|GO:0006939|GO:0016323|GO:0045987|GO:0008144|GO:0045211|GO:0042166|GO:0004872|GO:0043679|GO:0046541|GO:0007213|GO:0016907|GO:0007399|GO:0007165|GO:0006112|GO:0050796|GO:0007186|GO	.	NA	-	.	NA	NA	NA	NA	NA	NA	NA	NA	NA
LNCV6_128966_PI430048170	9.14319e-05	0.124874	3.79774	3.61845	3.6063	P	P	P	6.82794	6.7152	6.46877	P	P	P	LNCV6_128966_PI430048170	mRNA	GCATTTCCAGCTGTGCAGCACGTCTCAGAGATTCTTGAAGAATGAAGACATTTCTGCTCT	NM_004139	RefSeq	chr20	+	38346410	38377011	LBP	3929	lipopolysaccharide binding protein	GO:0005515|GO:0032755|GO:0034145|GO:0034142|GO:0070891|GO:0050830|GO:0043032|GO:0005615|GO:0032757|GO:0060265|GO:0002281|GO:0032496|GO:0044130|GO:0031663|GO:0008228|GO:0070062|GO:0009986|GO:0032760|GO:0042535|GO:0005102|GO:0032720|GO:0005576|GO:0006953|GO	.	NA	-	.	NA	NA	NA	NA	NA	NA	NA	NA	NA
LNCV6_129581_PI430048170	0.000586038	8.97117	6.98178	6.77473	6.47188	P	P	P	3.35746	3.99878	3.31506	P	P	P	LNCV6_129581_PI430048170	mRNA	GGCATAAGTTGTACTGAGGGTGTGCGCCAACTTAAACCAAAGGCTCTTTTCAGAGCCACC	NM_021018	RefSeq	chr6	-	26250141	26250607	HIST1H3F	8968	histone cluster 1, H3f	GO:0005515|GO:0010467|GO:0046982|GO:0006325|GO:0006335|GO:0005576|GO:0005634|GO:0000228|GO:0003677|GO:0032776|GO:0043234|GO:0060968|GO:0016020|GO:0000183|GO:0007596|GO:0045814|GO:0040029|GO:0005654|GO:0000786|GO:0070062	.	NA	-	.	NA	NA	NA	NA	NA	NA	NA	NA	NA
LNCV6_132811_PI430048170	0.000249044	0.0613962	2.60191	3.10876	2.49397	A	P	A	6.7595	6.9722	6.60339	P	P	P	LNCV6_132811_PI430048170	mRNA	CCTACTCGTGAAACGATGTGAACAAGCATTTTAAGGACAATAAAAAGTTAGCTGGTTGAA	NM_000444	RefSeq	chrX	+	22032443	22251310	PHEX	5251	phosphate regulating endopeptidase homolog, X-linked, transcript variant 1	GO:0048471|GO:0005794|GO:0005886|GO:0005783|GO:0007267|GO:0030282|GO:0001501|GO:0005887|GO:0004177|GO:0006508|GO:0008270|GO:0019637|GO:0004222|GO:0006464	.	NA	-	.	NA	NA	NA	NA	NA	NA	NA	NA	NA
LNCV6_136144_PI430048170	0.00370192	9.48311	5.80902	5.74805	5.24026	P	P	P	2.25492	2.91695	1.6959	A	P	A	LNCV6_136144_PI430048170	mRNA	CGGCATTAATTCACCAATGCATTTGGACAACTTGATGTAACTGACTTTATTTTATGTGAC	NM_032918	RefSeq	chr12	-	15107781	15221477	RERG	85004	RAS-like, estrogen-regulated, growth inhibitor, transcript variant 1	GO:0006184|GO:0030308|GO:0008285|GO:0016020|GO:0007264|GO:0030331|GO:0003924|GO:0005634|GO:0009725|GO:0019003|GO:0005525|GO:0005829	.	NA	-	.	NA	NA	NA	NA	NA	NA	NA	NA	NA
LNCV6_138403_PI430048170	0.0114318	0.481878	5.10169	5.09204	4.71181	P	P	P	6.00762	6.08741	6.00189	P	P	P	LNCV6_138403_PI430048170	mRNA	AGCTATTCCCTCCAGCATCTGGTTCTGTACAAAAATTAAATGCTTATTTGTTTAAGTCTC	NM_002405	RefSeq	chr22	-	37469062	37486440	MFNG	4242	MFNG O-fucosylpeptide 3-beta-N-acetylglucosaminyltransferase, transcript variant 1	GO:0045747|GO:0033829|GO:0007389|GO:0030173|GO:0008152|GO:0005615|GO:0046872|GO:0032092	.	NA	-	.	NA	NA	NA	NA	NA	NA	NA	NA	NA
LNCV6_139618_PI430048170	0.00141355	3.90108	6.88582	6.61733	6.59108	P	P	P	4.78291	4.70463	4.73278	P	P	P	LNCV6_139618_PI430048170	mRNA	GGCAGATGTCCCAATCCTGGAGGTCATCCATTAGGAATTAAATTCTCCAGCCTCAAAAAA	NM_001284286	RefSeq	chr22	+	31122922	31134697	INPP5J	27124	inositol polyphosphate-5-phosphatase J, transcript variant 2	GO:0031115|GO:0017124|GO:0052658|GO:0043647|GO:0005886|GO:0006661|GO:0052659|GO:0044281|GO:0004445|GO:0001726|GO:0034485|GO:0005829|GO:0030426|GO:0005737|GO:0043198|GO:0033137|GO:0046856|GO:0010977|GO:0006644	.	NA	-	.	NA	NA	NA	NA	NA	NA	NA	NA	NA
LNCV6_108866_PI430048170	5.25455e-05	3.54003	7.69343	7.50514	7.47521	P	P	P	5.74526	5.60391	5.85243	P	P	P	LNCV6_108866_PI430048170	mRNA	AACAATAAGCGTGTTGCAGTCAATGTATTAAGCAAAGCAAACCTGCCAGCCAGCAAATTC	NM_001170704	RefSeq	chrX	-	132369314	132489968	MBNL3	55796	muscleblind-like splicing regulator 3, transcript variant 6	GO:0008380|GO:0006397|GO:0005737|GO:0043484|GO:0007275|GO:0005634|GO:0046872|GO:0045662	.	NA	-	.	NA	NA	NA	NA	NA	NA	NA	NA	NA
LNCV6_137606_PI430048170	0.0058226	19.222	7.47627	7.16233	7.26702	P	P	P	3.68497	2.75492	2.35533	P	P	A	LNCV6_137606_PI430048170	mRNA	ATTTAATGGAAGGTTCCACAAGTCACCCTGTGATCAACAGTACCCGTATGGGACAAAGCT	NM_000641	RefSeq	chr19	-	55364381	55370463	IL11	3589	interleukin 11, transcript variant 1	GO:0008284|GO:0005142|GO:0007267|GO:0050731|GO:0005576|GO:0005125|GO:0005615|GO:0046888|GO:0005737|GO:0033138|GO:0045944|GO:0030219|GO:0030183|GO:0045444|GO:2000352|GO:0043410|GO:0008083	.	NA	-	.	NA	NA	NA	NA	NA	NA	NA	NA	NA
LNCV6_140806_PI430048170	2.39307e-05	0.0769021	5.2622	5.59332	5.40227	P	P	P	9.21683	9.14557	9.0095	P	P	P	LNCV6_140806_PI430048170	mRNA	TCTCATCTAAATATTTCCATATTCTGTATTAGGAGAAAATTACCCTCCCAGCACCAGCCC	NM_004415	RefSeq	chr6	+	7541636	7586713	DSP	1832	desmoplakin, transcript variant 1	GO:0005882|GO:0005515|GO:0030057|GO:0045109|GO:0005886|GO:0005634|GO:0086091|GO:0001533|GO:0006921|GO:0005916|GO:0005739|GO:0016323|GO:0086069|GO:0016337|GO:0003223|GO:0014704|GO:0097110|GO:0005080|GO:0030674|GO:0050839|GO:0086005|GO:0070062|GO:0006915|GO	.	NA	-	.	NA	NA	NA	NA	NA	NA	NA	NA	NA
LNCV6_142964_PI430048170	0.000104162	3.52433	7.15938	7.06228	6.86707	P	P	P	5.21929	5.08572	5.33602	P	P	P	LNCV6_142964_PI430048170	mRNA	AGTTTTGGTGTGACTGGACATACTTGCTTCAATAAAAGAATACATCACTCCCCTCAAAAA	NM_001282862	RefSeq	chr10	-	43194532	43229739	RASGEF1A	221002	RasGEF domain family, member 1A, transcript variant 1	GO:0005622|GO:0032320|GO:0016477|GO:0007264|GO:0046579|GO:0005088	.	NA	-	.	NA	NA	NA	NA	NA	NA	NA	NA	NA
LNCV6_137325_PI430048170	0.000358892	2.85049	11.8046	11.6711	11.6893	P	P	P	10.1266	10.1344	10.3615	P	P	P	LNCV6_137325_PI430048170	mRNA	ATGCCCCTTATTTATGGGAACCATTTCATTCTAACAGAATAAACCGAGAAGGAAACCAGA	NM_017870	RefSeq	chr11	+	60924440	60937159	TMEM132A	54972	transmembrane protein 132A, transcript variant 1	GO:0008150|GO:0003674|GO:0000139|GO:0005789|GO:0016021|GO:0070062	.	NA	-	.	NA	NA	NA	NA	NA	NA	NA	NA	NA
LNCV6_130088_PI430048170	0.00955488	0.471532	5.42175	4.91009	5.19681	P	P	P	6.3734	6.27815	6.16871	P	P	P	LNCV6_130088_PI430048170	mRNA	TTGTCTAAATATTTAGAAGGCGGAGAAGTTCCCAGAGGCTTCTGTACAGTCAGGTCTGCT	NM_000960	RefSeq	chr19	-	46620467	46625097	PTGIR	5739	prostaglandin I2 (prostacyclin) receptor (IP)	GO:0005886|GO:0004930|GO:0030819|GO:0007267|GO:0048662|GO:0005829|GO:0005085|GO:0043547|GO:0005887|GO:0007187|GO:0007596|GO:0032496|GO:0043950|GO:0007189|GO:0010642	.	NA	-	.	NA	NA	NA	NA	NA	NA	NA	NA	NA
LNCV6_136840_PI430048170	0.00214752	2.07999	4.63345	4.9941	4.70612	P	P	P	3.77908	3.83095	3.5662	P	P	P	LNCV6_136840_PI430048170	mRNA	GAGGAAAATCGGTAATAAAATAACATGGATTGAATGTTTACTGTGCGTCAAGCACAGTTA	NM_003828	RefSeq	chrX	+	150693363	150765103	MTMR1	8776	myotubularin related protein 1	GO:0005737|GO:0006661|GO:0005886|GO:0004438|GO:0046856|GO:0044281|GO:0006644|GO:0035335|GO:0004725|GO:0005829	.	NA	-	.	NA	NA	NA	NA	NA	NA	NA	NA	NA
LNCV6_136134_PI430048170	0.000469032	2.39799	8.0466	7.88959	7.83193	P	P	P	6.71057	6.77558	6.48985	P	P	P	LNCV6_136134_PI430048170	mRNA	TGGGTCTTGCAGTTTTTCAGGAGGCCTTGATTAAAATGCAAATACTTGTCTGAGAAAAAA	NM_153006	RefSeq	chr17	+	44004663	44009068	NAGS	162417	N-acetylglutamate synthase	GO:0034641|GO:0006536|GO:0005759|GO:0006526|GO:0000050|GO:0044281|GO:0004042	.	NA	-	.	NA	NA	NA	NA	NA	NA	NA	NA	NA
LNCV6_136197_PI430048170	0.00159281	2.00118	9.91882	9.78919	9.67983	P	P	P	8.84157	8.80858	8.74335	P	P	P	LNCV6_136197_PI430048170	mRNA	GTACATCTATGCAAAATACTTGAATGGGCCATGGTGCCTTTTTTCCTTGTTAGTATTTAA	NM_033274	RefSeq	chr5	-	157477303	157575823	ADAM19	8728	ADAM metallopeptidase domain 19	GO:0007507|GO:0017124|GO:0008270|GO:0016021|GO:0006509|GO:0004222	.	NA	-	.	NA	NA	NA	NA	NA	NA	NA	NA	NA
LNCV6_65572_PI430048170	0.00114416	0.475325	9.94083	9.74799	9.71326	P	P	P	10.861	10.8294	10.9391	P	P	P	LNCV6_65572_PI430048170	mRNA	TCACCTGGCAGCCCCTTCAGCTGCTAGTGATATCACTTGTTGGACATTTTTCCAATAAAG	NM_022823	RefSeq	chr2	-	27491882	27495259	FNDC4	64838	fibronectin type III domain containing 4	GO:0005886|GO:0005783|GO:0016021	.	NA	-	.	NA	NA	NA	NA	NA	NA	NA	NA	NA
LNCV6_140353_PI430048170	0.0013123	0.33314	4.67921	4.6804	4.56185	P	P	P	6.23452	6.38377	6.04374	P	P	P	LNCV6_140353_PI430048170	mRNA	CACGTCATGTGGATTCATTTTGAATTGGTGCTATTGGTATTTCCTCTGTTATTGCTAATA	NM_018911	RefSeq	chr5	+	140841321	141012344	PCDHA8	56140	protocadherin alpha 8, transcript variant 1	GO:0005887|GO:0005509|GO:0007155|GO:0007156|GO:0007399	.	NA	-	.	NA	NA	NA	NA	NA	NA	NA	NA	NA
LNCV6_137326_PI430048170	0.00106684	2.29149	5.63204	5.76912	5.56425	P	P	P	4.62693	4.44307	4.29493	P	P	P	LNCV6_137326_PI430048170	mRNA	TGTTGCACTTGGTTTTGACATTGCCAATGGGGTTTGAACCAGTGCTCTCTCTAAATGAAA	NM_001130966	RefSeq	chr7	+	139778247	140020325	TBXAS1	6916	thromboxane A synthase 1 (platelet), transcript variant 3	GO:0019369|GO:0019371|GO:0006805|GO:0005506|GO:0044281|GO:0006690|GO:0004497|GO:0045907|GO:0030644|GO:0005789|GO:0016021|GO:0016705|GO:0004796|GO:0055114|GO:0020037	.	NA	-	.	NA	NA	NA	NA	NA	NA	NA	NA	NA
LNCV6_127968_PI430048170	9.21808e-05	0.361637	12.7816	12.6509	12.6393	P	P	P	14.1616	14.1988	14.1167	P	P	P	LNCV6_127968_PI430048170	mRNA	CCTCGGCATGTACTGTAGTCACTCAGTATTTGTATATGTTGCTAGAATTTAGATTGTAAA	NM_080927	RefSeq	chr3	-	98795969	98901689	DCBLD2	131566	discoidin, CUB and LCCL domain containing 2	GO:0005515|GO:0030308|GO:0009986|GO:0005887|GO:0042060|GO:0030522	.	NA	-	.	NA	NA	NA	NA	NA	NA	NA	NA	NA
LNCV6_142992_PI430048170	0.000254495	3.60339	6.87158	6.99049	6.86485	P	P	P	5.21048	4.94501	5.01351	P	P	P	LNCV6_142992_PI430048170	mRNA	CCCCCAGGTGGCCACCAAGTTGTGGAAGCACATTTCTAAATAAAAACTGCTCTTAGAATG	NM_022047	RefSeq	chr6	+	35297817	35321771	DEF6	50619	differentially expressed in FDCP 6 homolog (mouse)	GO:0005737|GO:0016020|GO:0005886|GO:0005911|GO:0005634	.	NA	-	.	NA	NA	NA	NA	NA	NA	NA	NA	NA
LNCV6_144611_PI430048170	0.0060884	0.139409	3.1408	2.35295	3.21234	P	A	P	5.8124	5.9029	5.65441	P	P	P	LNCV6_144611_PI430048170	mRNA	CTTTCGGTATGGTAAAATTGAACCAATCACAGTTAAGATGAGAGATCAACCTGAGTTTTA	NM_178012	RefSeq	chr6	-	3224260	3227734	TUBB2B	347733	tubulin, beta 2B class IIb	GO:0005515|GO:0051258|GO:0005874|GO:0003924|GO:0005634|GO:0005525|GO:0055085|GO:0006184|GO:0005737|GO:0006457|GO:0005200|GO:0051084|GO:0001764|GO:0007017|GO:0044267	.	NA	-	.	NA	NA	NA	NA	NA	NA	NA	NA	NA
LNCV6_131158_PI430048170	0.00640745	0.331471	1.83725	2.45107	2.26723	A	P	A	3.74434	3.93468	3.71222	P	P	P	LNCV6_131158_PI430048170	mRNA	CAACTTTTTAGGAGTGCTTCCTCACAGTTACCAAGAATAAAGAAAGCTGGCCACCATAAA	NM_004271	RefSeq	chr6	+	6588700	6654983	LY86	9450	lymphocyte antigen 86	GO:0006954|GO:0005886|GO:0008283|GO:0045087|GO:0006959|GO:0031666|GO:0006915|GO:0005615	.	NA	-	.	NA	NA	NA	NA	NA	NA	NA	NA	NA
LNCV6_142767_PI430048170	4.0285e-05	4.94	6.09256	6.14675	6.3722	P	P	P	4.02792	3.9143	3.75864	P	P	P	LNCV6_142767_PI430048170	mRNA	GAGGGGGCGCTGGAGCTTCCAACCCGAGGCAATAAAAGAAATGTTGCGTAACTCAAAAAA	NM_002256	RefSeq	chr1	-	204190340	204196491	KISS1	3814	KiSS-1 metastasis-suppressor	GO:0005515|GO:0007010|GO:0005576	.	NA	-	.	NA	NA	NA	NA	NA	NA	NA	NA	NA
LNCV6_135563_PI430048170	9.80514e-05	15.8793	8.24278	8.07212	8.07741	P	P	P	4.25813	4.24319	3.90321	P	P	P	LNCV6_135563_PI430048170	mRNA	GAGCCTAAATTTAGTTCAGCTTACCTTTGAGAATAGCATCAATTCAGACTCTCTTTTCAT	NM_020455	RefSeq	chr6	+	142301918	142446266	ADGRG6	NA	adhesion G protein-coupled receptor G6, transcript variant a1	NA	.	NA	-	.	NA	NA	NA	NA	NA	NA	NA	NA	NA
LNCV6_128001_PI430048170	0.000341646	3.02012	8.77079	8.59323	8.41719	P	P	P	7.05168	7.1317	6.81748	P	P	P	LNCV6_128001_PI430048170	mRNA	TTTGTTGGAACAATTACACTGGCCATGCCATAATGTTGAATAAAACTCTCTTCTTATGAG	NM_016445	RefSeq	chr14	-	67386982	67412111	PLEK2	26499	pleckstrin 2	GO:0035556|GO:0005737|GO:0030036|GO:0031258|GO:0005856	.	NA	-	.	NA	NA	NA	NA	NA	NA	NA	NA	NA
LNCV6_135026_PI430048170	0.0015043	2.88665	9.33542	9.22675	8.95046	P	P	P	7.66455	7.73516	7.54516	P	P	P	LNCV6_135026_PI430048170	mRNA	CCACACCCTGTAGCAATACCAAGTGCTATTACATAATCAATGGACGATTTATACTTTTAT	NM_053279	RefSeq	chr8	-	11421463	11466767	FAM167A	83648	family with sequence similarity 167, member A	NA	.	NA	-	.	NA	NA	NA	NA	NA	NA	NA	NA	NA
LNCV6_145262_PI430048170	0.00728105	0.266438	6.9511	6.65775	6.32912	P	P	P	8.51749	8.59319	8.6164	P	P	P	LNCV6_145262_PI430048170	mRNA	GGTTAATGCTGTAGAATAGGACTGTATACCAAATGTAATCTTTCCAATGCTCCAATGAAT	NM_022114	RefSeq	chr1	+	3069177	3438621	PRDM16	63976	PR domain containing 16, transcript variant 1	GO:0005515|GO:0003713|GO:0046332|GO:0005634|GO:0000122|GO:0043457|GO:0046872|GO:0006351|GO:0043565|GO:0050872|GO:0050873|GO:0017053|GO:0060021|GO:0030853|GO:0045893|GO:0043586|GO:0045892|GO:0035019|GO:0030512|GO:0022008	.	NA	-	.	NA	NA	NA	NA	NA	NA	NA	NA	NA
LNCV6_128364_PI430048170	0.0232883	0.467335	3.54269	3.1705	3.13975	P	P	P	4.22116	4.79919	4.0504	P	P	P	LNCV6_128364_PI430048170	mRNA	GGCAAATGCTCTTTATGGGCAATAGGGTCTCATTAAATGATTGCTGAATAAATAACACAA	NM_052818	RefSeq	chr13	-	32400722	32428178	N4BP2L1	90634	NEDD4 binding protein 2-like 1, transcript variant 1	NA	.	NA	-	.	NA	NA	NA	NA	NA	NA	NA	NA	NA
LNCV6_65647_PI430048170	0.000746452	0.340116	7.56138	7.66406	7.43784	P	P	P	9.23182	9.19469	8.8895	P	P	P	LNCV6_65647_PI430048170	mRNA	GCTGTGTGGAAACATCTATCCTATAGATCATCCTATTCTTATGTGTCTTTGGTTATCAGA	NM_012413	RefSeq	chr2	+	37344609	37373322	QPCT	25797	glutaminyl-peptide cyclotransferase	GO:0016603|GO:0008270|GO:0017186|GO:0006464|GO:0070062	.	NA	-	.	NA	NA	NA	NA	NA	NA	NA	NA	NA
LNCV6_142068_PI430048170	0.0001724	0.324587	5.4597	5.22955	5.18477	P	P	P	6.93113	7.02069	6.79892	P	P	P	LNCV6_142068_PI430048170	mRNA	GCTTGAAACCAAAGCTTCAGATAAACTTGCAAGATAAGACAACTTTAAGAAACCAGTGTT	NM_003151	RefSeq	chr2	-	191029575	191151260	STAT4	6775	signal transducer and activator of transcription 4, transcript variant 1	GO:0043565|GO:0005515|GO:0005737|GO:0003700|GO:0008283|GO:0045944|GO:0019221|GO:0006468|GO:0005654|GO:0004871|GO:0007259|GO:0006351	.	NA	-	.	NA	NA	NA	NA	NA	NA	NA	NA	NA
LNCV6_128905_PI430048170	0.000978394	0.124528	1.56556	1.49483	1.58792	A	A	A	4.57199	4.739	4.32567	P	P	P	LNCV6_128905_PI430048170	mRNA	GGGTATCATTTAGATATTCCACTGTGTCTGTATTCAGACAAATGACACAATAAAACCCAA	NM_001032280	RefSeq	chr6	-	10396682	10412374	TFAP2A	7020	transcription factor AP-2 alpha (activating enhancer binding protein 2 alpha), transcript variant 2	GO:0005515|GO:0000987|GO:0044212|GO:0006366|GO:0000981|GO:0007605|GO:0000982|GO:0021559|GO:0042803|GO:0043231|GO:0009880|GO:0043524|GO:0010944|GO:0043525|GO:0014032|GO:0021623|GO:0005813|GO:0000976|GO:0001105|GO:0005794|GO:0030335|GO:0030501|GO:0042472|GO	.	NA	-	.	NA	NA	NA	NA	NA	NA	NA	NA	NA
LNCV6_142596_PI430048170	0.0130994	4.4164	5.02078	5.41445	5.22599	P	P	P	2.93019	3.60974	2.49882	P	P	P	LNCV6_142596_PI430048170	mRNA	GTGTGAAAACATGGTTATGGTAATAGGAACAGCTTTTAAAATGCTTTTGTATTTGGGCCT	NM_001242638	RefSeq	chr5	+	55851378	55922854	IL31RA	133396	interleukin 31 receptor A, transcript variant 4	GO:0043066|GO:0008284|GO:0004896|GO:0005886|GO:0019901|GO:0043031|GO:0042517|GO:0003713|GO:0019221|GO:0042523|GO:0042592|GO:0006952|GO:0007259|GO:0019955|GO:0000165|GO:0030225|GO:0030224|GO:0016021|GO:0045893|GO:0007169	.	NA	-	.	NA	NA	NA	NA	NA	NA	NA	NA	NA
LNCV6_138657_PI430048170	7.40724e-05	0.227373	6.86179	7.01257	6.79567	P	P	P	9.09704	9.00386	8.98589	P	P	P	LNCV6_138657_PI430048170	mRNA	ATTTTTGTGCAAATGAACTTCTCCTTTTGACCAGTAACCACCTTCCTTCAAGCCTTCAGC	NM_001297713	RefSeq	chr1	-	161983191	162024465	OLFML2B	25903	olfactomedin-like 2B, transcript variant 1	GO:0005576	.	NA	-	.	NA	NA	NA	NA	NA	NA	NA	NA	NA
LNCV6_111670_PI430048170	0.000244575	2.87196	10.6007	10.3425	10.4739	P	P	P	8.86415	8.99231	9.00203	P	P	P	LNCV6_111670_PI430048170	mRNA	CACCAAACCTTTCCTTACCAGCTCTGGTCTATATTGCTCCCATGCATTTAATATATTATT	NM_001431	RefSeq	chr6	-	130839347	131063322	EPB41L2	2037	erythrocyte membrane protein band 4.1-like 2, transcript variant 1	GO:0008091|GO:0030054|GO:0005886|GO:0003779|GO:0005634|GO:0008180|GO:0005198|GO:0030866|GO:0005654|GO:0042731|GO:0005925|GO:0019898|GO:0070062	.	NA	-	.	NA	NA	NA	NA	NA	NA	NA	NA	NA
LNCV6_136269_PI430048170	0.000801661	78.6173	9.79979	9.72266	9.65693	P	P	P	3.81026	3.08723	3.29665	P	P	P	LNCV6_136269_PI430048170	mRNA	CAATGGGATCTTTTAAGTACTCTTCAGTTTGTTCCAAGAAATGTGCCTACTGAAATCAAA	NM_198465	RefSeq	chrX	+	105822542	105958610	NRK	203447	Nik related kinase	GO:0035556|GO:0060721|GO:0005737|GO:0005083|GO:0008285|GO:0007567|GO:0004702|GO:0007256|GO:0006468|GO:0005524	.	NA	-	.	NA	NA	NA	NA	NA	NA	NA	NA	NA
LNCV6_141662_PI430048170	0.000947337	0.165716	5.17096	4.95366	4.78773	P	P	P	7.57161	7.51948	7.6247	P	P	P	LNCV6_141662_PI430048170	mRNA	ATTATTCCCCTAGGCTGAGCCTGCTCATGTACCTCTGATTAATAAATGCTTATGAAATGA	NM_005980	RefSeq	chr4	+	6693838	6697170	S100P	6286	S100 calcium binding protein P	GO:0005515|GO:0005737|GO:0010033|GO:0000287|GO:0050786|GO:0043542|GO:0005509|GO:0031528|GO:0005634|GO:0070062|GO:0048306	.	NA	-	.	NA	NA	NA	NA	NA	NA	NA	NA	NA
LNCV6_129020_PI430048170	0.00813327	7.53688	4.48033	4.67921	4.44203	P	P	P	2.16323	1.12534	1.36969	A	A	A	LNCV6_129020_PI430048170	mRNA	TCCCACCTGATATGCAGTGCTTTTGACTATCTTATGCATGGTTTATTCCTCTGGCTTGGA	NM_174934	RefSeq	chr11	-	118133376	118152915	SCN4B	6330	sodium channel, voltage gated, type IV beta subunit, transcript variant 1	GO:0005248|GO:0031226|GO:2000649|GO:0060307|GO:0086091|GO:0060048|GO:0044325|GO:0086067|GO:0014704|GO:0010765|GO:0086002|GO:0001518|GO:0035725|GO:0086012|GO:0006814|GO:0086006|GO:0017080	.	NA	-	.	NA	NA	NA	NA	NA	NA	NA	NA	NA
LNCV6_128241_PI430048170	0.00489407	2.07233	5.35484	5.28086	4.9744	P	P	P	4.16055	4.06577	4.25155	P	P	P	LNCV6_128241_PI430048170	mRNA	TATGGGAGAAGGGGGAGTAATGACTTGTACAAACAGTATTTCTGGTGTATATTTTAATGT	NM_001432	RefSeq	chr4	+	74365142	74388760	EREG	2069	epiregulin	GO:0005515|GO:0005154|GO:0008284|GO:0008285|GO:0042700|GO:0019221|GO:0050680|GO:0007267|GO:0043434|GO:0048146|GO:0001819|GO:0001556|GO:0005615|GO:0009653|GO:0000187|GO:0007173|GO:0045860|GO:0009887|GO:0048160|GO:0042108|GO:0045410|GO:0048011|GO:0051151|GO	.	NA	-	.	NA	NA	NA	NA	NA	NA	NA	NA	NA
LNCV6_144671_PI430048170	0.00186952	3.45015	7.22544	7.29545	7.22516	P	P	P	5.61265	5.47745	5.27757	P	P	P	LNCV6_144671_PI430048170	mRNA	ATCATTTGTTGGAATGAATTAAATAAACCCTTCCTGGGGCATCTGGCGAATCCCAAAAAA	NM_000361	RefSeq	chr20	-	23045632	23049664	THBD	7056	thrombomodulin	GO:0005515|GO:0010544|GO:0007565|GO:0005886|GO:0009986|GO:0010165|GO:0005509|GO:0051918|GO:0050900|GO:0051591|GO:0005615|GO:0007165|GO:0005887|GO:0007596|GO:0030195|GO:0032496|GO:0004872|GO:0004888	.	NA	-	.	NA	NA	NA	NA	NA	NA	NA	NA	NA
LNCV6_129773_PI430048170	7.71338e-05	19.0883	6.36988	6.54088	6.06563	P	P	P	1.96913	2.2335	2.03613	A	A	A	LNCV6_129773_PI430048170	mRNA	GTACAAGAAAATCATTAAGGAACATTTGGAGAGTTAGCTACTAGCTGCCTAAGTGTGCAC	NM_002620	RefSeq	chr4	+	73853295	73854481	PF4V1	5197	platelet factor 4 variant 1	GO:0008009|GO:0006955|GO:0070098|GO:0006954|GO:0007186|GO:0060326|GO:0042127|GO:0032496|GO:0045236|GO:0008201|GO:0005615|GO:0002690	.	NA	-	.	NA	NA	NA	NA	NA	NA	NA	NA	NA
LNCV6_142925_PI430048170	0.00375186	0.15677	0.285087	1.09586	1.13012	A	A	A	2.85339	3.93269	3.68599	P	P	P	LNCV6_142925_PI430048170	mRNA	CTGAACCATTGTGGTAAACTTTTGGAGTTGATATGGAATCACTTTAATGCTGTTTTCACA	NM_001184749	RefSeq	chrX	-	143622789	143636107	SLITRK4	139065	SLIT and NTRK-like family, member 4, transcript variant 1	GO:0016021|GO:0007409	.	NA	-	.	NA	NA	NA	NA	NA	NA	NA	NA	NA
LNCV6_127445_PI430048170	6.21429e-05	5.13046	10.3824	10.1619	10.1408	P	P	P	8.04635	7.83849	7.71611	P	P	P	LNCV6_127445_PI430048170	mRNA	CAGGACGCAGAGGACTCTAGGTTTAACATTTTGTACAAAATGGAACCTGTTAATCATATT	NM_194284	RefSeq	chr8	+	8702155	8704107	CLDN23	137075	claudin 23	GO:0016338|GO:0070830|GO:0005886|GO:0005198|GO:0034329|GO:0016021|GO:0005923|GO:0045216|GO:0042802	.	NA	-	.	NA	NA	NA	NA	NA	NA	NA	NA	NA
LNCV6_138852_PI430048170	6.37222e-05	0.432259	10.1299	10.1131	9.97087	P	P	P	11.1958	11.2927	11.3562	P	P	P	LNCV6_138852_PI430048170	mRNA	GGGGTTGTGCAGGTGTGAATAAAGAGAATAAGGAAGTTCTTGGAGATTATACTCAGAAAA	NM_001142784	RefSeq	chr9	+	34652184	34661901	IL11RA	3590	interleukin 11 receptor, alpha, transcript variant 3	GO:0032502|GO:0007165|GO:0004896|GO:0007566|GO:0005887|GO:0019221|GO:0060322|GO:0004871|GO:0004888	.	NA	-	.	NA	NA	NA	NA	NA	NA	NA	NA	NA
LNCV6_141497_PI430048170	0.0164204	9.18915	4.31315	4.43922	4.20294	P	P	P	1.78409	0.949012	0.206283	A	A	A	LNCV6_141497_PI430048170	mRNA	CACCAACAATCAGCTGTCATTTTATTAATCTATCCCTTTTGTGCATGCACCATTTCTCTC	NM_022049	RefSeq	chr1	+	100538171	100542027	GPR88	54112	G protein-coupled receptor 88	GO:0007186|GO:0005886|GO:0004930|GO:0050885|GO:0007626|GO:0016021|GO:0005575|GO:0019228	.	NA	-	.	NA	NA	NA	NA	NA	NA	NA	NA	NA
LNCV6_102642_PI430048170	0.00101066	3.25947	10.4138	10.0773	10.0094	P	P	P	8.30899	8.31234	8.75204	P	P	P	LNCV6_102642_PI430048170	mRNA	GCTAAACACTATTGCGGACATCCTTCAGGAGGAGAAGAAACAGGAAAAACAAAATGGAAA	NM_001286768	RefSeq	chr4	-	52590960	52659335	USP46	64854	ubiquitin specific peptidase 46, transcript variant 4	GO:0008343|GO:0005515|GO:0006511|GO:0016579|GO:0004843|GO:0048149|GO:0032228|GO:0001662|GO:0060013	.	NA	-	.	NA	NA	NA	NA	NA	NA	NA	NA	NA
LNCV6_142587_PI430048170	0.00980333	14.9847	5.16974	5.09004	4.85074	P	P	P	1.48247	0.112579	1.44645	A	A	A	LNCV6_142587_PI430048170	mRNA	GTACTATGTGCATGCATACTACCTATTTCTAAACTTTGCCATATTGAGGCCTTTATAAAC	NM_018557	RefSeq	chr2	-	140231426	142131701	LRP1B	53353	low density lipoprotein receptor-related protein 1B	GO:0043235|GO:0005041|GO:0005509|GO:0016021|GO:0015031|GO:0006898	.	NA	-	.	NA	NA	NA	NA	NA	NA	NA	NA	NA
LNCV6_141765_PI430048170	0.00137485	0.00241699	0.192135	0.275767	1.36505	A	A	A	9.52277	9.28527	9.40886	P	P	P	LNCV6_141765_PI430048170	mRNA	TTGTTTTAGCTGTTACACACACAGTAATACCTGAATATCCAACGGTATAGATCACAAGGG	NM_016588	RefSeq	chr6	-	5997999	6007400	NRN1	51299	neuritin 1, transcript variant 1	GO:0030054|GO:0005886|GO:0045202|GO:0031225|GO:0007399	.	NA	-	.	NA	NA	NA	NA	NA	NA	NA	NA	NA
LNCV6_133023_PI430048170	0.000351451	5.01609	10.3757	10.0901	9.95914	P	P	P	7.95836	7.78545	7.72294	P	P	P	LNCV6_133023_PI430048170	mRNA	AGCAGCCTTGGAAACCTAACCTGCCTCTTTTAGCATAATCACATTTTCTAAATGATTTTC	NM_001943	RefSeq	chr18	+	31498063	31548851	DSG2	1829	desmoglein 2	GO:0030057|GO:0005886|GO:0009986|GO:0060135|GO:0005509|GO:0006915|GO:0086091|GO:0016328|GO:0006921|GO:0086069|GO:0016324|GO:0005911|GO:0032570|GO:0016021|GO:0007155|GO:0007156|GO:0086005|GO:0070062	.	NA	-	.	NA	NA	NA	NA	NA	NA	NA	NA	NA
LNCV6_100806_PI430048170	7.23725e-05	11.4785	9.17666	9.44809	9.12999	P	P	P	5.94921	5.75612	5.46747	P	P	P	LNCV6_100806_PI430048170	mRNA	CTCGAAGCACAGCACACACTAACATCACCGTGGATGGACTTGAACCCGGGTGTTTGTATG	NM_002842	RefSeq	chr19	-	55181246	55209506	PTPRH	5794	protein tyrosine phosphatase, receptor type, H, transcript variant 1	GO:0005515|GO:0005737|GO:0006470|GO:0005887|GO:0005001|GO:0006915|GO:0035335	.	NA	-	.	NA	NA	NA	NA	NA	NA	NA	NA	NA
LNCV6_93765_PI430048170	0.000584818	0.289192	4.51713	4.19927	4.28445	P	P	P	6.03944	6.18295	6.16304	P	P	P	LNCV6_93765_PI430048170	mRNA	CAACTGGTGGTCTCTGAAGATCCAATGATGATGTCAGCAGTACCATCGGCAACATCATTA	NM_001001872	RefSeq	chr14	-	58004089	58152129	C14orf37	145407	chromosome 14 open reading frame 37	GO:0016021	.	NA	-	.	NA	NA	NA	NA	NA	NA	NA	NA	NA
LNCV6_144746_PI430048170	0.000272165	3.39701	11.7127	11.7048	11.415	P	P	P	9.94466	9.95956	9.63187	P	P	P	LNCV6_144746_PI430048170	mRNA	GTGTGTGCAAGTGCACATGTGTGTGTGTAATAACACATTGTAAAGAACAGAAATTACTTT	NM_019556	RefSeq	chrX	-	134887625	134915344	MOSPD1	56180	motile sperm domain containing 1	GO:0048471|GO:0005737|GO:0045944|GO:0005634|GO:0016021|GO:0000122	.	NA	-	.	NA	NA	NA	NA	NA	NA	NA	NA	NA
LNCV6_133443_PI430048170	0.000307028	0.286503	4.34984	4.16507	3.95695	P	P	P	6.06963	6.05027	5.76967	P	P	P	LNCV6_133443_PI430048170	mRNA	CTGAACCTTATGAAATATATGTATTTCATGGTACGTATTCTCTAGCACAGTCTGAGCAAT	NM_144646	RefSeq	chr4	-	70655540	70666631	JCHAIN	NA	immunoglobulin J polypeptide, linker protein for immunoglobulin alpha and mu polypeptides	NA	.	NA	-	.	NA	NA	NA	NA	NA	NA	NA	NA	NA
LNCV6_132452_PI430048170	0.0014699	0.0880207	4.50982	4.1108	3.78542	P	P	P	7.74287	7.73952	7.52234	P	P	P	LNCV6_132452_PI430048170	mRNA	CTGCACACATCCTTATCTTTGTTACATATGAAATATCTGTATCACGGGTATATTGAGAGA	NM_017852	RefSeq	chr19_GL949748v2_alt	+	946328	981128	NLRP2	55655	NLR family, pyrin domain containing 2, transcript variant 1	GO:0043280|GO:0005515|GO:0032090|GO:0005737|GO:0050718|GO:0005524	.	NA	-	.	NA	NA	NA	NA	NA	NA	NA	NA	NA
LNCV6_130324_PI430048170	0.000667732	0.276741	10.1674	9.89678	9.85751	P	P	P	11.8748	11.8768	11.7465	P	P	P	LNCV6_130324_PI430048170	mRNA	GACATTCTACAGTAGCCTGTGCTGAACTGATCTCTTAAATAAACTTGCTTCTGGTTAACT	NM_001624	RefSeq	chr6	+	106511854	106570449	AIM1	202	absent in melanoma 1	GO:0008150|GO:0003674|GO:0030246|GO:0005575	.	NA	-	.	NA	NA	NA	NA	NA	NA	NA	NA	NA
LNCV6_140392_PI430048170	0.000297009	17.1596	6.77341	6.80802	6.66904	P	P	P	2.49361	2.88596	2.53892	A	P	P	LNCV6_140392_PI430048170	mRNA	GCAGTGAGACTTTTATCACTGAATAGACAAATCATTTGTGCCGAAAATACATCTGGAATA	NM_001278393	RefSeq	chr12	-	95516559	95548272	USP44	84101	ubiquitin specific peptidase 44, transcript variant 3	GO:0005515|GO:0090231|GO:0016579|GO:0004843|GO:0090266|GO:0005730|GO:0060564|GO:0005634|GO:0004197|GO:0007067|GO:0015630|GO:0008270|GO:0043161|GO:0051301	.	NA	-	.	NA	NA	NA	NA	NA	NA	NA	NA	NA
LNCV6_143929_PI430048170	2.32642e-05	24.6631	5.01857	4.78796	4.94825	P	P	P	0.147595	0.510733	0.206283	A	A	A	LNCV6_143929_PI430048170	mRNA	GGACAAGTAAGTGGATAGGTCATAGAATTCCTACACAAGAATACCTGGACTAATAACTAT	NM_021954	RefSeq	chr13	-	20138255	20161044	GJA3	2700	gap junction protein, alpha 3, 46kDa	GO:0005243|GO:0007267|GO:0006810|GO:0005922|GO:0016021|GO:0055085|GO:0007601	.	NA	-	.	NA	NA	NA	NA	NA	NA	NA	NA	NA
LNCV6_98398_PI430048170	0.00028499	2.34648	8.45147	8.42025	8.21126	P	P	P	7.26842	7.06471	7.06001	P	P	P	LNCV6_98398_PI430048170	mRNA	GCACAGGTTTTTGGTTTGTTAATATGGTTGTGGTCATTCTATCTGTAATAGTGTCAACAA	NM_006210	RefSeq	chr19	-	56810076	56840726	PEG3	5178	paternally expressed 3, transcript variant 1	GO:0005737|GO:0035264|GO:0006366|GO:0006357|GO:0071514|GO:0000981|GO:0006915|GO:0005654|GO:0003676|GO:0001701|GO:0046872	.	NA	-	.	NA	NA	NA	NA	NA	NA	NA	NA	NA
LNCV6_141421_PI430048170	0.000419916	0.0188223	4.72513	4.29198	4.2976	P	P	P	10.2222	10.1979	10.1314	P	P	P	LNCV6_141421_PI430048170	mRNA	CCCTTGTGTAATTGCTTTGTGTGCGACAGGGAGGAAGTTTCAATAAAGCAGCAACAAGCT	NM_006762	RefSeq	chr1	-	30732467	30757836	LAPTM5	7805	lysosomal protein transmembrane 5	GO:0005887|GO:0006810|GO:0005765|GO:0005764	.	NA	-	.	NA	NA	NA	NA	NA	NA	NA	NA	NA
LNCV6_143825_PI430048170	5.83491e-06	0.138602	3.93619	3.73417	3.75284	P	P	P	6.77869	6.62592	6.57226	P	P	P	LNCV6_143825_PI430048170	mRNA	GTTATCTCTCCAAAACACGACCCACACGAGGACCTCGCATTAAAGTATTTTCGGAAAAAA	NM_001258018	RefSeq	chr19	-	49889655	49929539	IL4I1	259307	interleukin 4 induced 1, transcript variant 4	GO:0001716|GO:0005576|GO:0005764|GO:0055114	.	NA	-	.	NA	NA	NA	NA	NA	NA	NA	NA	NA
LNCV6_135983_PI430048170	8.02e-05	3.05219	10.6044	10.48	10.3621	P	P	P	8.9449	8.91142	8.7644	P	P	P	LNCV6_135983_PI430048170	mRNA	GCACATGCTTGAACTGTAGTAATGTTAGCTTGTTCTAAAGCTATCCATTGTGTCATATTT	NM_005923	RefSeq	chr6	-	136557048	136792518	MAP3K5	4217	mitogen-activated protein kinase kinase kinase 5	GO:0097300|GO:0005515|GO:0070301|GO:0005783|GO:0042803|GO:0005829|GO:0000186|GO:0000165|GO:0016032|GO:0004709|GO:0000287|GO:0043065|GO:0019901|GO:0006919|GO:0019903|GO:0008631|GO:0007254|GO:0007257|GO:0005524|GO:0008656|GO:0097190|GO:0043280|GO:0004672|GO	.	NA	-	.	NA	NA	NA	NA	NA	NA	NA	NA	NA
LNCV6_142606_PI430048170	0.00032196	2.12887	9.02193	8.90338	8.94674	P	P	P	7.78178	7.97757	7.83783	P	P	P	LNCV6_142606_PI430048170	mRNA	CACCTTCCTATGTTTTCATGGTTGTAAAACATAATAAAACCTCCCACGTGGAAGACTTGG	NM_001030059	RefSeq	chr10	+	120456953	120589855	PPAPDC1A	196051	phosphatidic acid phosphatase type 2 domain containing 1A	GO:0005886|GO:0046839|GO:0045087|GO:0016021|GO:0008195|GO:0038096	.	NA	-	.	NA	NA	NA	NA	NA	NA	NA	NA	NA
LNCV6_131197_PI430048170	0.00214527	0.220308	7.62823	7.56887	7.50647	P	P	P	9.87619	9.86527	9.47727	P	P	P	LNCV6_131197_PI430048170	mRNA	CTCCAGGCCTCAATTTTCCCTTCTTGTAAAATGGAATCTATATCTATAAAGGTTTCTTCA	NM_016533	RefSeq	chr12	-	564295	663741	NINJ2	4815	ninjurin 2, transcript variant 1	GO:0005887|GO:0042246|GO:0007399|GO:0007158	.	NA	-	.	NA	NA	NA	NA	NA	NA	NA	NA	NA
LNCV6_138324_PI430048170	0.000304727	0.208609	2.63111	2.24867	2.24069	P	P	A	4.8245	4.35841	4.7163	P	P	P	LNCV6_138324_PI430048170	mRNA	TCACAGCGCCACTCCTACTTTGTATGCTCATAGTTTAAATTTTTGTAGGAAACTTTCAAT	NM_001136105	RefSeq	chr11	+	111299250	111308735	COLCA2	120376	colorectal cancer associated 2, transcript variant 3	GO:0005737	.	NA	-	.	NA	NA	NA	NA	NA	NA	NA	NA	NA
LNCV6_140637_PI430048170	0.000201339	2.8177	6.80051	6.80056	6.72693	P	P	P	5.17563	5.3152	5.34906	P	P	P	LNCV6_140637_PI430048170	mRNA	AGAGGATCGACCAGTCAGAGTTCGAAGGCTTTGAGTATATCAACCCATTATTGCTGTCCA	NM_002744	RefSeq	chr1	+	2050469	2185395	PRKCZ	5590	protein kinase C, zeta, transcript variant 1	GO:2000553|GO:0005515|GO:0032753|GO:0030054|GO:0050732|GO:0015459|GO:0060291|GO:0030010|GO:0043560|GO:0018105|GO:0047496|GO:0043274|GO:0046326|GO:0007179|GO:0070374|GO:0070062|GO:0035748|GO:2000664|GO:0031584|GO:2000667|GO:2000463|GO:0007616|GO:0005815|GO	.	NA	-	.	NA	NA	NA	NA	NA	NA	NA	NA	NA
LNCV6_53744_PI430048170	0.000191365	2.41506	8.65196	8.69019	8.87848	P	P	P	7.56596	7.49555	7.34449	P	P	P	LNCV6_53744_PI430048170	mRNA	CTTCCAACTTCAAAAAAGCCAAGAGAGTCAAAACAGAGGATGAAAAAGAGAAAGACCCAG	NM_004964	RefSeq	chr1	+	32292106	32333623	HDAC1	3065	histone deacetylase 1	GO:0005515|GO:0010467|GO:0000790|GO:0006367|GO:0003700|GO:0044212|GO:0006325|GO:0010832|GO:0007219|GO:0016581|GO:0016580|GO:0007179|GO:0000785|GO:0001103|GO:0000976|GO:0001106|GO:0043044|GO:0019213|GO:0031492|GO:0060766|GO:0001047|GO:0000122|GO:0045786|GO	.	NA	-	.	NA	NA	NA	NA	NA	NA	NA	NA	NA
LNCV6_142740_PI430048170	0.000146493	0.184101	7.06783	7.08989	6.69929	P	P	P	9.48849	9.52144	9.17973	P	P	P	LNCV6_142740_PI430048170	mRNA	CACATTTTTAAAACCAAATGTTCAATCTGTATTACTCTTTGCCGTCTTGTATGTAGAGGC	NM_001142393	RefSeq	chr6	-	11183297	11382348	NEDD9	4739	neural precursor cell expressed, developmentally down-regulated 9, transcript variant 3	GO:0005515|GO:0005794|GO:0005819|GO:0005634|GO:0030027|GO:0007165|GO:0000922|GO:0005737|GO:0007067|GO:0007229|GO:0007010|GO:0007155|GO:0051017|GO:0005925|GO:0005938|GO:0040008|GO:0051301	.	NA	-	.	NA	NA	NA	NA	NA	NA	NA	NA	NA
LNCV6_130106_PI430048170	0.000971062	0.304839	5.09303	4.79748	4.71784	P	P	P	6.68599	6.48826	6.59659	P	P	P	LNCV6_130106_PI430048170	mRNA	CCTGCTGGTTTGACGTGGAGCTATCCTGTGAAATAAAACAGCTTAACTTTTCTCAAAAAA	NM_014850	RefSeq	chr3	-	8980590	9249685	SRGAP3	9901	SLIT-ROBO Rho GTPase activating protein 3, transcript variant 1	GO:0005515|GO:0051056|GO:0048365|GO:0030336|GO:0005737|GO:0007264|GO:0032855|GO:0030675|GO:0005829	.	NA	-	.	NA	NA	NA	NA	NA	NA	NA	NA	NA
LNCV6_133802_PI430048170	0.00905367	0.447789	5.77141	5.46183	5.26133	P	P	P	6.77246	6.64716	6.59255	P	P	P	LNCV6_133802_PI430048170	mRNA	CCCTCTATTTATTTTTATGTCAGGTGAACTGGCATGCTGAACATATATATATATAGGCTC	NM_145172	RefSeq	chr1	+	85062297	85133138	WDR63	126820	WD repeat domain 63, transcript variant 1	NA	.	NA	-	.	NA	NA	NA	NA	NA	NA	NA	NA	NA
LNCV6_55036_PI430048170	0.000493235	6.8425	13.2594	13.1557	13.0026	P	P	P	10.3622	10.3954	10.3477	P	P	P	LNCV6_55036_PI430048170	mRNA	GAAAAGTGTCGAGTTGTGCACATCCATTTCTTGTTTCACAATGTTTAAAAGTGACAGTAA	NM_002585	RefSeq	chr1	+	164559359	164851823	PBX1	5087	pre-B-cell leukemia homeobox 1, transcript variant 1	GO:0005515|GO:0006694|GO:0001658|GO:0008284|GO:0003700|GO:0030325|GO:0048706|GO:0048538|GO:0005634|GO:0009954|GO:0030326|GO:0048536|GO:0009952|GO:0043433|GO:0005737|GO:0030278|GO:0045944|GO:0007548|GO:0035019|GO:0035162|GO:0005667|GO:0046982|GO:0000978|GO	.	NA	-	.	NA	NA	NA	NA	NA	NA	NA	NA	NA
LNCV6_68458_PI430048170	0.00182674	2.53471	6.196	6.10263	6.04987	P	P	P	4.74191	4.95339	4.61066	P	P	P	LNCV6_68458_PI430048170	mRNA	AGGTGGAAACACTGCATGATTTTGAGGCAGCAAATTCTGATGAACTTACCTTACAAAGGG	NM_001635	RefSeq	chr7	-	38383695	38631567	AMPH	273	amphiphysin, transcript variant 1	GO:0005515|GO:0031256|GO:0030054|GO:0005543|GO:0007268|GO:0030672|GO:0048488|GO:0007612|GO:0015629|GO:0008021|GO:0006897	.	NA	-	.	NA	NA	NA	NA	NA	NA	NA	NA	NA
LNCV6_145484_PI430048170	0.00248675	0.13154	3.66385	3.82849	3.19878	P	P	P	6.61096	6.45578	6.46982	P	P	P	LNCV6_145484_PI430048170	mRNA	TTCCTGCTTCTCTAGGCAAGGTCCCGTCATAGCAATTATATTTATTATCCCTTGAAAAAA	NM_002529	RefSeq	chr1	+	156860878	156881850	NTRK1	4914	neurotrophic tyrosine kinase, receptor, type 1, transcript variant 2	GO:0005515|GO:0021553|GO:0010465|GO:0046579|GO:0048678|GO:0042803|GO:0043068|GO:0043524|GO:0060009|GO:0046777|GO:0007411|GO:0051602|GO:0007611|GO:0043025|GO:0031667|GO:0070374|GO:0005166|GO:0048406|GO:0009986|GO:0051968|GO:0007568|GO:0018108|GO:0071316|GO	.	NA	-	.	NA	NA	NA	NA	NA	NA	NA	NA	NA
LNCV6_118214_PI430048170	6.36851e-05	0.336336	7.75366	7.87414	7.7508	P	P	P	9.32834	9.47858	9.28392	P	P	P	LNCV6_118214_PI430048170	mRNA	CTCTTTTTGGTGGTGGTTAAAAGGGAACACAAAACATTTAAATAAAACTTTCCAAATATT	NM_000478	RefSeq	chr1	+	21509364	21578412	ALPL	249	alkaline phosphatase, liver/bone/kidney, transcript variant 1	GO:0005515|GO:0071529|GO:0005886|GO:0051384|GO:0033280|GO:0031225|GO:0005615|GO:0046872|GO:0001649|GO:0031012|GO:0003006|GO:0071407|GO:0001501|GO:0001958|GO:0016462|GO:0004035|GO:0016020|GO:0016311|GO:0032496|GO:0016021|GO:0046677|GO:0070062	.	NA	-	.	NA	NA	NA	NA	NA	NA	NA	NA	NA
LNCV6_136468_PI430048170	4.17311e-05	0.0819986	2.58412	2.78334	2.62077	A	P	A	6.46864	6.19417	6.13576	P	P	P	LNCV6_136468_PI430048170	mRNA	CCTGGAAGACAGTCTGCTTAACTGGTGAAAATATACTGGATTATGTTTAATTATGGTTCT	NM_030572	RefSeq	chr12	+	21526321	21531276	SPX	80763	spexin hormone	GO:0030133|GO:0010459|GO:0003084|GO:0031765|GO:0031766|GO:0045944|GO:0035814|GO:0032099|GO:0005184|GO:0044539|GO:0005615|GO:0051930	.	NA	-	.	NA	NA	NA	NA	NA	NA	NA	NA	NA
LNCV6_141450_PI430048170	2.81757e-06	7.28646	15.9095	15.9201	15.7745	P	P	P	12.9369	12.9607	13.1092	P	P	P	LNCV6_141450_PI430048170	mRNA	GGCTCCCGTTTAGCATTTTGTACTTAAGGAAATAAAAAACCAACAAAGGATCTCACATTT	NM_000599	RefSeq	chr2	-	216672104	216695549	IGFBP5	3488	insulin-like growth factor binding protein 5	GO:0017148|GO:0005515|GO:0048630|GO:0051897|GO:0031994|GO:0031995|GO:0005615|GO:0001558|GO:0014912|GO:0010906|GO:0031069|GO:0035556|GO:0044342|GO:0006006|GO:0001968|GO:0030336|GO:0060056|GO:0005576|GO:0048662|GO:0042593|GO:0016942|GO:0001649|GO:0007165|GO	.	NA	-	.	NA	NA	NA	NA	NA	NA	NA	NA	NA
LNCV6_58895_PI430048170	0.00022062	3.14588	12.5881	12.6474	12.4737	P	P	P	11.009	10.9809	10.7507	P	P	P	LNCV6_58895_PI430048170	mRNA	CACAGAGAATCATGTGTACCTAACTAAGGATGATCTAGGATAAGTAACTCCTGTTTTATA	NM_001278387	RefSeq	chr12	-	46183055	46269425	SLC38A1	81539	solute carrier family 38, member 1, transcript variant 3	GO:0005886|GO:0005283|GO:0006865|GO:0007268|GO:0003333|GO:0055085|GO:0015804|GO:0005887|GO:0001504|GO:0015175|GO:0016021|GO:0006814|GO:0070062|GO:0006811	.	NA	-	.	NA	NA	NA	NA	NA	NA	NA	NA	NA
LNCV6_135234_PI430048170	0.000162293	0.146398	1.77462	1.98807	2.13336	A	A	A	4.83605	4.64827	4.7441	P	P	P	LNCV6_135234_PI430048170	mRNA	TACTGTAATTGGCTCTTAAGGCTTGAAGTAACCTTATAGGTTACTCATAAGGCATATACA	NM_000433	RefSeq	chr1	-	183555561	183590604	NCF2	4688	neutrophil cytosolic factor 2, transcript variant 1	GO:0045730|GO:0005515|GO:0002474|GO:0006801|GO:0045777|GO:0032870|GO:0005829|GO:0005737|GO:0043525|GO:0032496|GO:0032010|GO:0090382|GO:0042554|GO:0048010|GO:0014823|GO:0051701|GO:0001669|GO:0042493|GO:0007568|GO:0005730|GO:0042590|GO:0009055|GO:0008022|GO	.	NA	-	.	NA	NA	NA	NA	NA	NA	NA	NA	NA
LNCV6_138627_PI430048170	0.000422511	3.97341	11.0421	11.077	10.8956	P	P	P	9.07264	9.15052	8.8044	P	P	P	LNCV6_138627_PI430048170	mRNA	GGAGCAAAACTGGCTATTTCTGTGAATGATATAAAACAGGGTTCTCTGTAATGGTATTGT	NM_052920	RefSeq	chr2	+	23385426	23708613	KLHL29	114818	kelch-like family member 29	NA	.	NA	-	.	NA	NA	NA	NA	NA	NA	NA	NA	NA
LNCV6_133376_PI430048170	4.9498e-06	2.49563	5.10566	5.16797	5.06972	P	P	P	3.74571	3.82695	3.81288	P	P	P	LNCV6_133376_PI430048170	mRNA	GTTAAGTGTGGGTTGTGCATCCCCAATCCAGATAATAAAGACTTTGTAAAACATGAATAA	NM_020997	RefSeq	chr1	-	225886281	225889146	LEFTY1	10637	left-right determination factor 1	GO:0007368|GO:0010862|GO:0042981|GO:0000122|GO:0060395|GO:0005125|GO:0005160|GO:0005615|GO:0003007|GO:0043408|GO:0016049|GO:0007179|GO:0048468|GO:0008083	.	NA	-	.	NA	NA	NA	NA	NA	NA	NA	NA	NA
LNCV6_145148_PI430048170	7.08361e-07	3.48166	12.1453	12.0897	12.1669	P	P	P	10.37	10.3439	10.2886	P	P	P	LNCV6_145148_PI430048170	mRNA	GAACTCTTTTTAAACTCTATGCTCCGAGTAGAGTTCATCTTTATATTAAACTTCCCCTGT	NM_001360	RefSeq	chr11	-	71434410	71448431	DHCR7	1717	7-dehydrocholesterol reductase, transcript variant 1	GO:0006695|GO:0001568|GO:0005783|GO:0030324|GO:0045540|GO:0047598|GO:0044281|GO:0009791|GO:0030154|GO:0005640|GO:0016020|GO:0035264|GO:0042127|GO:0005789|GO:0016021|GO:0055114	.	NA	-	.	NA	NA	NA	NA	NA	NA	NA	NA	NA
LNCV6_138365_PI430048170	3.72466e-07	61.1482	6.15166	6.10954	6.00901	P	P	P	0.118282	0.145219	0.206283	A	A	A	LNCV6_138365_PI430048170	mRNA	AACTCGCTCAGAAGAGGGAACTAAGCATTTTTGGCAACCAATGGCAGATATCTATGGCAG	NM_021080	RefSeq	chr1	-	56997905	58250539	DAB1	1600	Dab, reelin signal transducer, homolog 1 (Drosophila)	GO:0043005|GO:0048471|GO:0007264|GO:0021942|GO:0021517|GO:0005829|GO:0021799|GO:0045860|GO:0007628|GO:0043025|GO:0051645|GO:0042493|GO:0014069|GO:0045177|GO:0021813|GO:0016358|GO:0046426|GO:0021589|GO:0005903|GO:0048712|GO:0007162|GO:0016020|GO:0045666|GO	.	NA	-	.	NA	NA	NA	NA	NA	NA	NA	NA	NA
LNCV6_143456_PI430048170	0.000132804	0.138518	4.82997	5.1159	4.82917	P	P	P	7.74426	7.87625	7.72468	P	P	P	LNCV6_143456_PI430048170	mRNA	GCTTCTACCTTTATTGCAGTTCCCCAAATCGCCTAATAAACTTTCCTCTTGCAAAGCAGA	NM_002279	RefSeq	chr17_GL383564v2_alt	+	70460	76767	KRT33B	3884	keratin 33B, type I	GO:0005882|GO:0042633|GO:0005198|GO:0007568|GO:0005615|GO:0070062	.	NA	-	.	NA	NA	NA	NA	NA	NA	NA	NA	NA
LNCV6_132066_PI430048170	0.000129911	2.40617	7.61778	7.54064	7.44026	P	P	P	6.20823	6.3913	6.196	P	P	P	LNCV6_132066_PI430048170	mRNA	TTCCTGTTACACTGTGTTCAGCTATCTTCAGCCACCTTAAATTCCCATGGATGAGTTTTC	NM_001282437	RefSeq	chr10	-	100273277	100286712	BLOC1S2	282991	biogenesis of lysosomal organelles complex-1, subunit 2, transcript variant 4	GO:0005515|GO:0008625|GO:0048490|GO:0005813|GO:0008284|GO:0043015|GO:0032438|GO:0005634|GO:0008022|GO:0031175|GO:0005739|GO:0031083|GO:0045944|GO:0007020|GO:0000930|GO:0060155|GO:0008089|GO:0055037|GO:0045893	.	NA	-	.	NA	NA	NA	NA	NA	NA	NA	NA	NA
LNCV6_143889_PI430048170	2.72254e-05	6.85526	12.5935	12.3637	12.3127	P	P	P	9.73585	9.7416	9.45888	P	P	P	LNCV6_143889_PI430048170	mRNA	CAACCAAACCACTCCTATCTGCATGATTCTGAACATCTGGATGCCTGTTGTTTTACTGTG	NM_012329	RefSeq	chr17	-	55392612	55421980	MMD	23531	monocyte to macrophage differentiation-associated	GO:0016020|GO:0005887|GO:0031902|GO:0019835|GO:0004872|GO:0005765	.	NA	-	.	NA	NA	NA	NA	NA	NA	NA	NA	NA
LNCV6_140896_PI430048170	0.000432907	2.86711	8.59024	8.4182	8.23218	P	P	P	6.96915	7.01069	6.70559	P	P	P	LNCV6_140896_PI430048170	mRNA	CTTTATGCCAGAGTGGTTTACCCCATTCACAAAATTTCTTATGCATACATTGCTATTGAA	NM_001130675	RefSeq	chr4	-	140388452	140427661	CLGN	1047	calmegin, transcript variant 2	GO:0007338|GO:0006461|GO:0044183|GO:0006457|GO:0005783|GO:0005509|GO:0005789|GO:0051082|GO:0016021|GO:0005635|GO:0007339	.	NA	-	.	NA	NA	NA	NA	NA	NA	NA	NA	NA
LNCV6_111515_PI430048170	0.000308829	0.360105	7.25191	7.25871	7.15277	P	P	P	8.68549	8.81181	8.57966	P	P	P	LNCV6_111515_PI430048170	mRNA	TGAACGGCATCTACCAGTTCATCATGGACCGCTTCCCCTTCTACCGGGACAACAAGCAGG	NM_001453	RefSeq	chr6	+	1610445	1613894	FOXC1	2296	forkhead box C1	GO:0005515|GO:0001657|GO:0003700|GO:0055010|GO:0044212|GO:0006366|GO:0001756|GO:0001654|GO:0000981|GO:0003705|GO:0048844|GO:0005634|GO:0007507|GO:0001541|GO:0005737|GO:0050880|GO:0014032|GO:0007219|GO:0045944|GO:0030199|GO:0042475|GO:0043010|GO:0030203|GO	.	NA	-	.	NA	NA	NA	NA	NA	NA	NA	NA	NA
LNCV6_138797_PI430048170	5.41524e-06	0.398808	11.603	11.6125	11.6883	P	P	P	12.9592	12.9969	12.9271	P	P	P	LNCV6_138797_PI430048170	mRNA	GGATGCACCCGTCTTTAGAACCAAAAATATTCTCTCACAGATTTCATTCCTGTTTTTATA	NM_016463	RefSeq	chr5	+	139648715	139683095	CXXC5	51523	CXXC finger protein 5	GO:0007165|GO:0005737|GO:0008270|GO:0005654|GO:0004871|GO:0043123|GO:0003677	.	NA	-	.	NA	NA	NA	NA	NA	NA	NA	NA	NA
LNCV6_145281_PI430048170	0.0118549	5.04494	4.3986	4.56804	4.03702	P	P	P	1.59553	2.64655	1.51234	A	P	A	LNCV6_145281_PI430048170	mRNA	CCTCTTTTGGTGTCTTAAGGCTTTTTGAAGCTTATTTTACTGTGAGTTTATTGGGAGTAT	NM_152709	RefSeq	chr10	+	68827536	68893060	STOX1	219736	storkhead box 1, transcript variant 1	GO:0005737|GO:0005730|GO:0005654|GO:0005634|GO:0003677	.	NA	-	.	NA	NA	NA	NA	NA	NA	NA	NA	NA
LNCV6_142815_PI430048170	0.00659151	2.03839	11.1739	11.0963	10.8462	P	P	P	10.0559	9.97219	10.0247	P	P	P	LNCV6_142815_PI430048170	mRNA	CAAGTGTATTTTTAACTGTCTGGTTTGTACTTTTATGACTTTTGTACTACCAAAGCGGAG	NM_001085400	RefSeq	chr4	-	37610633	37686377	RELL1	768211	RELT-like 1, transcript variant 1	GO:0005886|GO:0015630|GO:0016021	.	NA	-	.	NA	NA	NA	NA	NA	NA	NA	NA	NA
LNCV6_140067_PI430048170	0.00036818	0.480878	10.5681	10.4499	10.3338	P	P	P	11.6311	11.4851	11.4047	P	P	P	LNCV6_140067_PI430048170	mRNA	GCAATATCTGTTACTAGAGAACATTCCCATGTGTTTAAACTCTTCACTTCTTAGATGCAT	NM_001193460	RefSeq	chr12	+	65278642	65466907	MSRB3	253827	methionine sulfoxide reductase B3, transcript variant 3	GO:0005739|GO:0005783|GO:0030091|GO:0033743|GO:0008270|GO:0006979|GO:0055114	.	NA	-	.	NA	NA	NA	NA	NA	NA	NA	NA	NA
LNCV6_136969_PI430048170	0.000104801	8.52546	3.13302	3.35769	3.46044	P	P	P	0.323959	0.159741	0.206283	A	A	A	LNCV6_136969_PI430048170	mRNA	GGGATGCAAAGTAGAATTGCTTTACATTGACTATATATGTGACATGTACGTTGCTGTTTT	NM_001010872	RefSeq	chr6	+	54846770	54945099	FAM83B	222584	family with sequence similarity 83, member B	NA	.	NA	-	.	NA	NA	NA	NA	NA	NA	NA	NA	NA
LNCV6_130917_PI430048170	0.000104972	0.455665	11.0812	10.9453	11.0004	P	P	P	12.1321	12.113	12.1859	P	P	P	LNCV6_130917_PI430048170	mRNA	CACTGCTGGGTTTTACATCCAGATAGTAATAAACACCATTTCATCATTTTCTCTTGGAAA	NM_001243926	RefSeq	chr3	+	50611861	50649297	MAPKAPK3	7867	mitogen-activated protein kinase-activated protein kinase 3, transcript variant 1	GO:0005515|GO:0034142|GO:0005634|GO:0007265|GO:0051403|GO:0005829|GO:0002756|GO:0000187|GO:0005737|GO:0018105|GO:0002755|GO:0032496|GO:0034097|GO:0034138|GO:0004708|GO:0048010|GO:0048011|GO:0031965|GO:0038124|GO:0038123|GO:0034134|GO:0006950|GO:0002224|GO	.	NA	-	.	NA	NA	NA	NA	NA	NA	NA	NA	NA
LNCV6_129861_PI430048170	6.68101e-07	0.0842854	3.32412	3.48704	3.40617	P	P	P	7.06195	6.93645	6.92521	P	P	P	LNCV6_129861_PI430048170	mRNA	ACGCTCAAAGCTTTTCCCAGGGAAAGGAACTCTCTAAAATAGTAATCTGATTTGATGAAA	NM_181643	RefSeq	chr1	+	111346559	111353017	PIFO	128344	primary cilia formation, transcript variant 1	GO:0005515|GO:0005802|GO:0033674|GO:0017137|GO:0019901|GO:0043015|GO:0048487|GO:0005634|GO:0036064|GO:0031344|GO:0030030|GO:0016023|GO:0019894	.	NA	-	.	NA	NA	NA	NA	NA	NA	NA	NA	NA
[truncated: 1,416 more rows]
